# Supplementary material for: SNPC-1.3 is a sex-specific transcription factor that drives male piRNA expression in C. elegans
Source: eLife. 2021 Feb 15;10:e60681. doi: 10.7554/eLife.60681 (PMC7884074; doi:10.7554/eLife.60681)
Supplement: Figure 1—source data 1. [file elife-60681-fig1-data1.xlsx]

## Sheet: Sheet1
genotype	temperature (Celsius)	time (hours)	experiment probe type	control probe type	experiment probe 1 ct	experiment probe 2 ct	control probe 1 ct	control probe 2 ct	date
gei-11::aid	20	48	21UR-2502	U18	34.0989	34.0869	25.0335	25.2475	190918
gei-11::aid;sun-1p::tir1	20	48	21UR-2502	U18	37.4122	38.5181	25.1106	25.2081	190918
gei-11::aid	20	72	21UR-2502	U18	31.6294	31.5794	24.8241	24.5967	190918
gei-11::aid;sun-1p::tir1	20	72	21UR-2502	U18	36.0044	35.8392	25.7899	25.6192	190918
gei-11::aid	20	48	21UR-1848	U18	33.0174	33.1038	25.0335	25.2475	190918
gei-11::aid;sun-1p::tir1	20	48	21UR-1848	U18	36.041	36.3388	25.1106	25.2081	190918
gei-11::aid	20	72	21UR-1848	U18	30.6609	30.6976	24.8241	24.5967	190918
gei-11::aid;sun-1p::tir1	20	72	21UR-1848	U18	35.006	34.2988	25.7899	25.6192	190918
gei-11::aid	20	48	21UR-4817	U18	35.1642	36.0407	25.0335	25.2475	190918
gei-11::aid;sun-1p::tir1	20	48	21UR-4817	U18	39.5747	37.0649	25.1106	25.2081	190918
gei-11::aid	20	72	21UR-4817	U18	33.5415	33.4873	24.8241	24.5967	190918
gei-11::aid;sun-1p::tir1	20	72	21UR-4817	U18	38.244	37.3631	25.7899	25.6192	190918
gei-11::aid	20	48	21UR-1258	U18	29.8896	29.4762	25.0335	25.2475	190918
gei-11::aid;sun-1p::tir1	20	48	21UR-1258	U18	34.4297	35.0878	25.1106	25.2081	190918
gei-11::aid	20	72	21UR-1258	U18	32.1917	31.7324	24.8241	24.5967	190918
gei-11::aid;sun-1p::tir1	20	72	21UR-1258	U18	32.3976	32.4489	25.7899	25.6192	190918
gei-11::aid	20	48	21UR-3142	U18	32.3205	32.0642	25.0335	25.2475	190918
gei-11::aid;sun-1p::tir1	20	48	21UR-3142	U18	37.4261	37.1041	25.1106	25.2081	190918
gei-11::aid	20	72	21UR-3142	U18	34.4574	33.8049	24.8241	24.5967	190918
gei-11::aid;sun-1p::tir1	20	72	21UR-3142	U18	36.1643	34.9037	25.7899	25.6192	190918
gei-11::aid	20	48	21UR-3766	U18	31.6458	31.3328	25.0335	25.2475	190918
gei-11::aid;sun-1p::tir1	20	48	21UR-3766	U18	37.2584	37.1198	25.1106	25.2081	190918
gei-11::aid	20	72	21UR-3766	U18	33.255	33.0566	24.8241	24.5967	190918
gei-11::aid;sun-1p::tir1	20	72	21UR-3766	U18	34.1675	34.295	25.7899	25.6192	190918
