# Supplementary material for: SNPC-1.3 is a sex-specific transcription factor that drives male piRNA expression in C. elegans
Source: eLife. 2021 Feb 15;10:e60681. doi: 10.7554/eLife.60681 (PMC7884074; doi:10.7554/eLife.60681)
Supplement: Figure 2—source data 1. [file elife-60681-fig2-data1.xlsx]

## Sheet: Sheet1
condition	temperature (Celsius)	time (hours)	experiment probe type	control probe type	experiment probe 1 ct	experiment probe 2 ct	control probe 1 ct	control probe 2 ct	date
EV	20	36	snpc-1.3	eft-2	26.2432	26.1952	19.9059	19.9258	201115
glp-1	20	36	snpc-1.3	eft-2	28.853	28.9649	20.1126	20.2172	201115
EV	20	72	snpc-1.3	eft-2	30.6199	30.9413	19.4113	19.8533	201115
glp-1	20	72	snpc-1.3	eft-2	29.6264	29.5077	21.8098	22.0922	201115
EV	20	36	snpc-4	eft-2	27.2601	27.0611	19.9059	19.9258	201115
glp-1	20	36	snpc-4	eft-2	28.2182	28.3161	20.1126	20.2172	201115
EV	20	72	snpc-4	eft-2	24.2901	24.5391	19.4113	19.8533	201115
glp-1	20	72	snpc-4	eft-2	28.3105	28.1395	21.8098	22.0922	201115
