# Supplementary material for: SNPC-1.3 is a sex-specific transcription factor that drives male piRNA expression in C. elegans
Source: eLife. 2021 Feb 15;10:e60681. doi: 10.7554/eLife.60681 (PMC7884074; doi:10.7554/eLife.60681)
Supplement: Figure 2—source data 2. [file elife-60681-fig2-data2.xlsx]

## Sheet: Sheet1
Channel	bio replicate	Genotype	protein	Signal	Total	Area	Bkgnd.	date
700	2	snpc-1.3::3xflag	tubulin	0.811173	1.63414	1674	0.000491619	201101
700	2	snpc-1.3::3xflag;glp-4(-)	tubulin	0.294122	1.05084	1674	0.000452042	201101
700	2	snpc-1.3(-)	tubulin	0.615087	1.49473	1674	0.000525475	201101
800	2	snpc-1.3::3xflag	snpc-1.3	0.0288721	0.107379	1344	5.84126e-05	201101
800	2	snpc-1.3::3xflag;glp-4(-)	snpc-1.3	0.00201428	0.0800401	1344	5.80549e-05	201101
800	2	snpc-1.3(-)	snpc-1.3	-0.00183976	0.0647305	1344	4.95315e-05	201101
700	1	snpc-1.3::3xflag	tubulin	0.624109	1.39144	1798	0.000426769	201020
700	1	snpc-1.3::3xflag;glp-4(-)	tubulin	0.295996	1.02303	1798	0.000404358	201020
700	1	snpc-1.3(-)	tubulin	0.507597	1.28607	1798	0.000432968	201020
800	1	snpc-1.3::3xflag	snpc-1.3	0.0547907	0.156266	2310	4.39286e-05	201020
800	1	snpc-1.3::3xflag;glp-4(-)	snpc-1.3	0.00904	0.107624	2310	4.26769e-05	201020
800	1	snpc-1.3(-)	snpc-1.3	0.000419974	0.090949	2310	3.91901e-05	201020
