# Supplementary material for: SNPC-1.3 is a sex-specific transcription factor that drives male piRNA expression in C. elegans
Source: eLife. 2021 Feb 15;10:e60681. doi: 10.7554/eLife.60681 (PMC7884074; doi:10.7554/eLife.60681)
Supplement: Figure 2—source data 3. [file elife-60681-fig2-data3.xlsx]

## Sheet: Sheet1
genotype	temperature (Celsius)	time (hours)	experiment type	control type	experiment 1 ct	experiment 2 ct	control 1 ct	control 2 ct	date
him-8	25	36hr	snpc-1.3	eft-2	26.8519	26.6906	30.8881	31.0403	200825
fem-1	25	36hr	snpc-1.3	eft-2	30.0237	30.0946	30.5779	30.4408	200825
him-8	25	48hr	snpc-1.3	eft-2	25.8362	25.5285	31.1382	30.8068	200825
fem-1	25	48hr	snpc-1.3	eft-2	26.5856	26.4674	29.3263	29.4362	200825
him-8	25	36hr	snpc-4	eft-2	29.2572	29.1434	30.8881	31.0403	200825
fem-1	25	36hr	snpc-4	eft-2	28.604	28.9582	30.5779	30.4408	200825
him-8	25	48hr	snpc-4	eft-2	28.4272	28.2507	31.1382	30.8068	200825
fem-1	25	48hr	snpc-4	eft-2	26.071	25.9742	29.3263	29.4362	200825
