# Supplementary material for: SNPC-1.3 is a sex-specific transcription factor that drives male piRNA expression in C. elegans
Source: eLife. 2021 Feb 15;10:e60681. doi: 10.7554/eLife.60681 (PMC7884074; doi:10.7554/eLife.60681)
Supplement: Figure 2—source data 4. [file elife-60681-fig2-data4.xlsx]

## Sheet: Sheet1
Channel	bio replicate	Genotype	protein	Signal	Total	Area	Bkgnd.	date
700	2	snpc-1.3::3xflag; him-8(-)	tubulin	0.857805	1.81586	1566	0.000611782	201104
700	2	snpc-1.3::3xflag;fem-1(-)	tubulin	0.946041	1.80926	1566	0.000551224	201104
800	2	snpc-1.3::3xflag; him-8(-)	snpc-1.3	0.106976	0.217676	2211	5.00679e-05	201104
800	2	snpc-1.3::3xflag;fem-1(-)	snpc-1.3	0.00218743	0.10419	2211	4.6134e-05	201104
700	1	snpc-1.3::3xflag; him-8(-)	tubulin	0.668366	1.27599	1375	0.000441909	201016
700	1	snpc-1.3::3xflag;fem-1(-)	tubulin	1.11616	1.71837	1375	0.000437975	201016
800	1	snpc-1.3::3xflag; him-8(-)	snpc-1.3	0.0490958	0.138201	2345	3.7998e-05	201016
800	1	snpc-1.3::3xflag;fem-1(-)	snpc-1.3	0.00738761	0.0895042	2345	3.50177e-05	201016
