# Supplementary material for: SNPC-1.3 is a sex-specific transcription factor that drives male piRNA expression in C. elegans
Source: eLife. 2021 Feb 15;10:e60681. doi: 10.7554/eLife.60681 (PMC7884074; doi:10.7554/eLife.60681)
Supplement: Figure 3—source data 1. [file elife-60681-fig3-data1.xlsx]

## Sheet: Sheet1
genotype	temperature (Celsius)	time (hours)	experiment probe type	control probe type	experiment probe 1 ct	experiment probe 2 ct	control probe 1 ct	control probe 2 ct
N2	20	48	21UR-2502	u18	21.66	21.37	30.95	30.8
prg-1	20	48	21UR-2502	u18	21.66	21.17	40	40
snpc-1.3	20	48	21UR-2502	u18	21.74	21.42	28.87	28.97
N2	20	72	21UR-2502	u18	21.84	21.67	29.91	29.76
prg-1	20	72	21UR-2502	u18	21.28	21.14	40	40
snpc-1.3	20	72	21UR-2502	u18	21.24	21.16	29.37	29.76
N2	20	48	21UR-1848	u18	21.66	21.37	28.26	28.17
prg-1	20	48	21UR-1848	u18	21.66	21.17	40	40
snpc-1.3	20	48	21UR-1848	u18	21.74	21.42	27.96	27.7
N2	20	72	21UR-1848	u18	21.84	21.67	27.72	27.75
prg-1	20	72	21UR-1848	u18	21.28	21.14	40	40
snpc-1.3	20	72	21UR-1848	u18	21.24	21.16	27.07	27.41
N2	20	48	21UR-1258	u18	21.66	21.37	28.61	28.48
prg-1	20	48	21UR-1258	u18	21.66	21.17	40	40
snpc-1.3	20	48	21UR-1258	u18	21.74	21.42	32.51	32.26
N2	20	72	21UR-1258	u18	21.84	21.67	32.83	32.58
prg-1	20	72	21UR-1258	u18	21.28	21.14	40	40
snpc-1.3	20	72	21UR-1258	u18	21.24	21.16	33.06	33
N2	20	48	21UR-3766	u18	21.66	21.37	29.57	29.75
prg-1	20	48	21UR-3766	u18	21.66	21.17	40	40
snpc-1.3	20	48	21UR-3766	u18	21.74	21.42	32.13	32.12
N2	20	72	21UR-3766	u18	21.84	21.67	33.07	33.11
prg-1	20	72	21UR-3766	u18	21.28	21.14	40	40
snpc-1.3	20	72	21UR-3766	u18	21.24	21.16	34.09	34
N2	20	48	21UR-3142	u18	21.66	21.37	28.78	28.91
prg-1	20	48	21UR-3142	u18	21.66	21.17	40	40
snpc-1.3	20	48	21UR-3142	u18	21.74	21.42	32.57	32.95
N2	20	72	21UR-3142	u18	21.84	21.67	31.18	31.67
prg-1	20	72	21UR-3142	u18	21.28	21.14	40	40
snpc-1.3	20	72	21UR-3142	u18	21.24	21.16	32.47	32.46
N2	20	48	21UR-4817	u18	21.44	21.09	32.59	32.26
prg-1	20	48	21UR-4817	u18	21.64	21.66	40	40
snpc-1.3	20	48	21UR-4817	u18	20.93	21.17	31.17	31.17
N2	20	72	21UR-4817	u18	19.93	20.15	30.12	30.36
prg-1	20	72	21UR-4817	u18	22.81	22.56	40	40
snpc-1.3	20	72	21UR-4817	u18	20.29	20.36	30.97	31.03
