# Supplementary material for: SNPC-1.3 is a sex-specific transcription factor that drives male piRNA expression in C. elegans
Source: eLife. 2021 Feb 15;10:e60681. doi: 10.7554/eLife.60681 (PMC7884074; doi:10.7554/eLife.60681)
Supplement: Figure 3—source data 2. [file elife-60681-fig3-data2.xlsx]

## Sheet: Sheet1
genotype	temperature (Celsius)	time (hours)	experiment probe type	control probe type	experiment probe 1 ct	experiment probe 2 ct	control probe 1 ct	control probe 2 ct
him-8, snpc-1.3	25	72	21UR-2502	u18	21.81	21.74	28.14	28.14
him-8	25	72	21UR-2502	u18	22.79	22.31	31.42	31.74
fem-1	25	72	21UR-2502	u18	23.68	23.87	31.67	31.77
fem-1, snpc-1.3	25	72	21UR-2502	u18	23.75	24.02	31.56	31.59
him-8, snpc-1.3	25	72	21UR-1258	u18	21.81	21.74	31.57	32.51
him-8	25	72	21UR-1258	u18	22.79	22.31	29.46	29.46
fem-1	25	72	21UR-1258	u18	23.68	23.87	34.91	35.96
fem-1, snpc-1.3	25	72	21UR-1258	u18	23.75	24.02	36.16	36.04
him-8, snpc-1.3	25	72	21UR-3766	u18	21.81	21.74	31.77	32.43
him-8	25	72	21UR-3766	u18	22.79	22.31	28.12	28.04
fem-1	25	72	21UR-3766	u18	23.68	23.87	35.01	35.6
fem-1, snpc-1.3	25	72	21UR-3766	u18	23.75	24.02	36.14	35
him-8	25	72	21UR-3142	u18	22.22	22.13	30.02	29.94
him-8, snpc-1.3	25	72	21UR-3142	u18	22.15	22.31	40	40
fem-1	25	72	21UR-3142	u18	21.62	21.54	32.93	32.64
fem-1, snpc-1.3	25	72	21UR-3142	u18	21.6	21.6	40	40
him-8	25	72	21UR-4817	u18	22.22	22.13	32.42	32.64
him-8, snpc-1.3	25	72	21UR-4817	u18	21.38	21.52	29.91	29.93
fem-1	25	72	21UR-4817	u18	21.62	21.54	30.58	31
fem-1, snpc-1.3	25	72	21UR-4817	u18	21.39	21.37	30.47	30.61
him-8	25	72	21UR-1848	u18	21.66	21.37	28.67	28.51
him-8, snpc-1.3	25	72	21UR-1848	u18	21.3	20.94	26.79	26.91
fem-1	25	72	21UR-1848	u18	21.83	22.01	28.17	28.1
fem-1, snpc-1.3	25	72	21UR-1848	u18	21.58	21.48	27.48	27.6
