# Supplementary material for: SNPC-1.3 is a sex-specific transcription factor that drives male piRNA expression in C. elegans
Source: eLife. 2021 Feb 15;10:e60681. doi: 10.7554/eLife.60681 (PMC7884074; doi:10.7554/eLife.60681)
Supplement: Figure 4—source data 1. [file elife-60681-fig4-data1.xlsx]

## Sheet: Sheet1
genotype	temperature (Celsius)	time (hours)	primer region	input 1 ct	input 2 ct	IP 1 ct	IP 2 ct	date
N2	20	48	21UR-2502	24.3461	24.5727	37.6881	37.1323	190712
snpc-1.3a::link::3xflag	20	48	21UR-2502	22.0017	22.214	29.1034	29.1263	190712
gei-11::aid; sun-1p::tir1; 1.3a::link::3xflag	20	48	21UR-2502	23.1759	23.1625	35.3267	35.5182	190712
N2	20	48	Small cluster	23.2433	23.4319	34.8297	34.7642	190712
snpc-1.3a::link::3xflag	20	48	Small cluster	21.2513	21.2951	29.2012	29.2474	190712
gei-11::aid; sun-1p::tir1; 1.3a::link::3xflag	20	48	Small cluster	21.9758	22.0056	33.3028	33.3866	190712
N2	20	48	Intergenic	25.0442	25.3166	38.2312	38.8211	190712
snpc-1.3a::link::3xflag	20	48	Intergenic	22.8719	22.8842	34.2995	34.5121	190712
gei-11::aid; sun-1p::tir1; 1.3a::link::3xflag	20	48	Intergenic	23.5956	23.6139	36.5015	37.1277	190712
