# Supplementary material for: SNPC-1.3 is a sex-specific transcription factor that drives male piRNA expression in C. elegans
Source: eLife. 2021 Feb 15;10:e60681. doi: 10.7554/eLife.60681 (PMC7884074; doi:10.7554/eLife.60681)
Supplement: Figure 5—source data 1. [file elife-60681-fig5-data1.xlsx]

## Sheet: Sheet1
genotype	temperature (Celsius)	time (hours)	experiment probe type	control probe type	experiment probe 1 ct	experiment probe 2 ct	control probe 1 ct	control probe 2 ct
N2	20	24	snpc-1.3	eft2	24.45	25.98	14.9	16.18
N2	20	32	snpc-1.3	eft2	24.53	25.48	15.41	16.19
N2	20	36	snpc-1.3	eft2	24.1	25.04	15.17	15.95
N2	20	40	snpc-1.3	eft2	24.93	25.48	15.58	16.13
N2	20	44	snpc-1.3	eft2	25.53	26.11	14.8	15.2
N2	20	48	snpc-1.3	eft2	29	29.32	16.11	16.28
N2	20	52	snpc-1.3	eft2	28.89	28.75	16.36	16.08
N2	20	56	snpc-1.3	eft2	28.42	28.33	16.07	15.66
N2	20	72	snpc-1.3	eft2	27.41	26.06	15.6	14.27
snpc-1.3(-)	20	24	snpc-1.3	eft2	26.24	27.58	15.49	17.06
snpc-1.3(-)	20	32	snpc-1.3	eft2	25.99	26.79	15.35	16.47
snpc-1.3(-)	20	36	snpc-1.3	eft2	26.28	27.11	15.59	16.55
snpc-1.3(-)	20	40	snpc-1.3	eft2	26.43	27.35	15.45	16.38
snpc-1.3(-)	20	44	snpc-1.3	eft2	27.11	27.7	15.29	16.13
snpc-1.3(-)	20	48	snpc-1.3	eft2	29.24	29.74	16.33	16.66
snpc-1.3(-)	20	52	snpc-1.3	eft2	29.13	29.11	16.37	16.23
snpc-1.3(-)	20	56	snpc-1.3	eft2	27.66	27.17	15.24	14.61
snpc-1.3(-)	20	72	snpc-1.3	eft2	28.85	26.36	16.02	13.89
N2	20	24	snpc-4	eft2	23.03	24.44	14.9	16.18
N2	20	32	snpc-4	eft2	23.48	24.25	15.41	16.19
N2	20	36	snpc-4	eft2	23.33	24.16	15.17	15.95
N2	20	40	snpc-4	eft2	23.91	24.39	15.58	16.13
N2	20	44	snpc-4	eft2	22.91	23.29	14.8	15.2
N2	20	48	snpc-4	eft2	23.91	24.27	16.11	16.28
N2	20	52	snpc-4	eft2	23.24	23.19	16.36	16.08
N2	20	56	snpc-4	eft2	22.08	22.01	16.07	15.66
N2	20	72	snpc-4	eft2	20.48	19.12	15.6	14.27
snpc-1.3(-)	20	24	snpc-4	eft2	23.85	25.28	15.49	17.06
snpc-1.3(-)	20	32	snpc-4	eft2	23.6	24.68	15.35	16.47
snpc-1.3(-)	20	36	snpc-4	eft2	23.78	24.76	15.59	16.55
snpc-1.3(-)	20	40	snpc-4	eft2	23.76	24.9	15.45	16.38
snpc-1.3(-)	20	44	snpc-4	eft2	23.53	24.32	15.29	16.13
snpc-1.3(-)	20	48	snpc-4	eft2	24.46	24.84	16.33	16.66
snpc-1.3(-)	20	52	snpc-4	eft2	23.5	23.65	16.37	16.23
snpc-1.3(-)	20	56	snpc-4	eft2	21.28	20.63	15.24	14.61
snpc-1.3(-)	20	72	snpc-4	eft2	21.44	19.03	16.02	13.89
N2	20	24	tra-1a	eft2	21.02	22.52	14.9	16.18
N2	20	32	tra-1a	eft2	21.58	22.72	15.41	16.19
N2	20	36	tra-1a	eft2	22.06	23.05	15.17	15.95
N2	20	40	tra-1a	eft2	22.21	23.08	15.58	16.13
N2	20	44	tra-1a	eft2	21.44	22.13	14.8	15.2
N2	20	48	tra-1a	eft2	22.24	22.56	16.11	16.28
N2	20	52	tra-1a	eft2	22.15	22.21	16.36	16.08
N2	20	56	tra-1a	eft2	21.46	21.46	16.07	15.66
N2	20	72	tra-1a	eft2	20.36	19.05	15.6	14.27
snpc-1.3(-)	20	24	tra-1a	eft2	21.68	23.34	15.49	17.06
snpc-1.3(-)	20	32	tra-1a	eft2	21.94	23.08	15.35	16.47
snpc-1.3(-)	20	36	tra-1a	eft2	22.23	23.43	15.59	16.55
snpc-1.3(-)	20	40	tra-1a	eft2	22.21	23.36	15.45	16.38
snpc-1.3(-)	20	44	tra-1a	eft2	22.08	22.94	15.29	16.13
snpc-1.3(-)	20	48	tra-1a	eft2	22.53	23.06	16.33	16.66
snpc-1.3(-)	20	52	tra-1a	eft2	22.27	22.29	16.37	16.23
snpc-1.3(-)	20	56	tra-1a	eft2	20.89	20.29	15.24	14.61
snpc-1.3(-)	20	72	tra-1a	eft2	21.29	19.1	16.02	13.89
