# Supplementary material for: SNPC-1.3 is a sex-specific transcription factor that drives male piRNA expression in C. elegans
Source: eLife. 2021 Feb 15;10:e60681. doi: 10.7554/eLife.60681 (PMC7884074; doi:10.7554/eLife.60681)
Supplement: Figure 5—source data 2. [file elife-60681-fig5-data2.xlsx]

## Sheet: Sheet1
genotype	temperature (Celsius)	time (hours)	experiment probe type	control probe type	experiment probe 1 ct	experiment probe 2 ct	control probe 1 ct	control probe 2 ct
N2	20	48	snpc-1.3	eft-2	25.35	26.9	20.47	20.35
snpc-1.3(TBS1x)	20	48	snpc-1.3	eft-2	23.06	24.62	18.49	18.68
snpc-1.3(TBS2x)	20	48	snpc-1.3	eft-2	27.13	29.32	24.13	23.89
snpc-1.3(TBS3x)	20	48	snpc-1.3	eft-2	25.47	27.5	22.42	22.83
N2	20	72	snpc-1.3	eft-2	24.26	25.27	21.49	21.35
snpc-1.3(TBS1x)	20	72	snpc-1.3	eft-2	21.99	23.11	19.47	19.69
snpc-1.3(TBS2x)	20	72	snpc-1.3	eft-2	17.4	17.7	16.3	16.53
snpc-1.3(TBS3x)	20	72	snpc-1.3	eft-2	14.47	15.73	13.91	15.05
N2	20	48	21UR-1258	u18	28	28.14	20.23	20.34
snpc-1.3(TBS1x)	20	48	21UR-1258	u18	27.36	27.88	19.86	20.15
snpc-1.3(TBS2x)	20	48	21UR-1258	u18	28.08	28.6	19.43	20.03
snpc-1.3(TBS3x)	20	48	21UR-1258	u18	30.24	30.43	20.47	21.05
N2	20	72	21UR-1258	u18	27.67	28	21.21	21.45
snpc-1.3(TBS1x)	20	72	21UR-1258	u18	27.11	27.51	20.39	20.83
snpc-1.3(TBS2x)	20	72	21UR-1258	u18	25.78	26.38	20.69	21.27
snpc-1.3(TBS3x)	20	72	21UR-1258	u18	26.57	27.1	21.22	21.85
N2	20	48	21UR-3142	u18	28	28.14	20.23	20.34
snpc-1.3(TBS1x)	20	48	21UR-3142	u18	27.36	27.88	19.86	20.15
snpc-1.3(TBS2x)	20	48	21UR-3142	u18	28.08	28.6	19.43	20.03
snpc-1.3(TBS3x)	20	48	21UR-3142	u18	30.24	30.43	20.47	21.05
N2	20	72	21UR-3142	u18	27.67	28	21.21	21.45
snpc-1.3(TBS1x)	20	72	21UR-3142	u18	27.11	27.51	20.39	20.83
snpc-1.3(TBS2x)	20	72	21UR-3142	u18	25.78	26.38	20.69	21.27
snpc-1.3(TBS3x)	20	72	21UR-3142	u18	26.54	27.1	21.22	21.85
N2	20	48	21UR-3766	u18	29.05	29.93	19.3	20.38
snpc-1.3(TBS1x)	20	48	21UR-3766	u18	29.24	30.22	19.44	20.77
snpc-1.3(TBS2x)	20	48	21UR-3766	u18	29.63	30.28	19.25	20.16
snpc-1.3(TBS3x)	20	48	21UR-3766	u18	32.24	32.21	22.47	22.24
N2	20	72	21UR-3766	u18	27.76	27.9	19.6	20.01
snpc-1.3(TBS1x)	20	72	21UR-3766	u18	29.13	29.85	21.34	21.71
snpc-1.3(TBS2x)	20	72	21UR-3766	u18	26.78	27.38	19.67	20.49
snpc-1.3(TBS3x)	20	72	21UR-3766	u18	27.2	27.7	19.93	20.6
N2	20	48	21UR-2502	u18	30.93	30.96	20.93	20.91
snpc-1.3(TBS1x)	20	48	21UR-2502	u18	30.77	31.05	21.57	21.7
snpc-1.3(TBS2x)	20	48	21UR-2502	u18	30.91	30.66	22.52	22.81
snpc-1.3(TBS3x)	20	48	21UR-2502	u18	26.11	26.11	18.73	18.82
N2	20	72	21UR-2502	u18	26.6	26.82	19	18.86
snpc-1.3(TBS1x)	20	72	21UR-2502	u18	27.04	27.18	19.43	19.44
snpc-1.3(TBS2x)	20	72	21UR-2502	u18	30.54	30.62	22.18	22.09
snpc-1.3(TBS3x)	20	72	21UR-2502	u18	30.45	30.38	20.4	20.35
N2	20	48	21UR-4817	u18	33.29	34.28	20.93	20.91
snpc-1.3(TBS1x)	20	48	21UR-4817	u18	34	34.12	21.57	21.7
snpc-1.3(TBS2x)	20	48	21UR-4817	u18	33.7	33.54	22.52	22.81
snpc-1.3(TBS3x)	20	48	21UR-4817	u18	29.73	29.98	18.73	18.82
N2	20	72	21UR-4817	u18	29.69	29.91	19	18.86
snpc-1.3(TBS1x)	20	72	21UR-4817	u18	29.94	30.23	19.43	19.44
snpc-1.3(TBS2x)	20	72	21UR-4817	u18	33.73	33.89	22.18	22.09
snpc-1.3(TBS3x)	20	72	21UR-4817	u18	33.26	33.19	20.4	20.35
N2	20	48	21UR-1848	u18	30.77	31.11	20.93	20.91
snpc-1.3(TBS1x)	20	48	21UR-1848	u18	31.07	30.99	21.57	21.7
snpc-1.3(TBS2x)	20	48	21UR-1848	u18	30.29	30.42	22.52	22.81
snpc-1.3(TBS3x)	20	48	21UR-1848	u18	26.67	26.48	18.73	18.82
N2	20	72	21UR-1848	u18	26.54	26.9	19	18.86
snpc-1.3(TBS1x)	20	72	21UR-1848	u18	27.55	27.14	19.43	19.44
snpc-1.3(TBS2x)	20	72	21UR-1848	u18	30.06	30.13	22.18	22.09
snpc-1.3(TBS3x)	20	72	21UR-1848	u18	30.21	30.18	20.4	20.35
