# Supplementary material for: SNPC-1.3 is a sex-specific transcription factor that drives male piRNA expression in C. elegans
Source: eLife. 2021 Feb 15;10:e60681. doi: 10.7554/eLife.60681 (PMC7884074; doi:10.7554/eLife.60681)
Supplement: Figure 6—source data 1. [file elife-60681-fig6-data1.xlsx]

## Sheet: 190422.Exu.Fertility.Assay.2
Progeny	Genotype
138	N2
114	N2
243	N2
195	N2
37	N2
211	N2
207	N2
212	N2
75	N2
247	N2
191	N2
76	N2
180	N2
254	N2
225	N2
53	N2
149	snpc-1.3(-)
112	snpc-1.3(-)
158	snpc-1.3(-)
86	snpc-1.3(-)
87	snpc-1.3(-)
76	snpc-1.3(-)
96	snpc-1.3(-)
151	snpc-1.3(-)
84	snpc-1.3(-)
90	snpc-1.3(-)
114	snpc-1.3(-)
107	snpc-1.3(-)
118	snpc-1.3(-)
126	snpc-1.3(-)
35	snpc-1.3(-)
52	snpc-1.3(-)
