# Supplementary material for: SNPC-1.3 is a sex-specific transcription factor that drives male piRNA expression in C. elegans
Source: eLife. 2021 Feb 15;10:e60681. doi: 10.7554/eLife.60681 (PMC7884074; doi:10.7554/eLife.60681)
Supplement: Figure 6—source data 2. [file elife-60681-fig6-data2.xlsx]

## Sheet: Sheet1
2	fem-1
2	fem-1
2	fem-1
2	fem-1
1	fem-1
2	fem-1
2	fem-1
2	fem-1
2	fem-1
2	fem-1
2	fem-1
2	fem-1
2	fem-1
2	fem-1
2	fem-1
2	fem-1
2	snpc-1.3, fem-1
2	snpc-1.3, fem-1
2	snpc-1.3, fem-1
2	snpc-1.3, fem-1
2	snpc-1.3, fem-1
2	snpc-1.3, fem-1
2	snpc-1.3, fem-1
2	snpc-1.3, fem-1
2	snpc-1.3, fem-1
2	snpc-1.3, fem-1
2	snpc-1.3, fem-1
2	snpc-1.3, fem-1
2	snpc-1.3, fem-1
2	snpc-1.3, fem-1
2	snpc-1.3, fem-1
2	snpc-1.3, fem-1
24	fem-1xhim8
28	fem-1xhim8
153	fem-1xhim8
53	fem-1xhim8
57	fem-1xhim8
134	fem-1xhim8
101	fem-1xhim8
89	fem-1xhim8
85	fem-1xhim8
116	fem-1xhim8
123	fem-1xhim8
58	fem-1xhim8
60	fem-1xhim8
146	fem-1xhim8
20	fem-1xhim8
32	fem-1xhim8
48	snpc-1.3, fem-1xhim8
103	snpc-1.3, fem-1xhim8
39	snpc-1.3, fem-1xhim8
77	snpc-1.3, fem-1xhim8
101	snpc-1.3, fem-1xhim8
131	snpc-1.3, fem-1xhim8
105	snpc-1.3, fem-1xhim8
89	snpc-1.3, fem-1xhim8
92	snpc-1.3, fem-1xhim8
102	snpc-1.3, fem-1xhim8
120	snpc-1.3, fem-1xhim8
112	snpc-1.3, fem-1xhim8
78	snpc-1.3, fem-1xhim8
38	snpc-1.3, fem-1xhim8
99	snpc-1.3, fem-1xhim8
52	snpc-1.3, fem-1xhim8
17	fem-1xhim8, snpc-1.3
16	fem-1xhim8, snpc-1.3
16	fem-1xhim8, snpc-1.3
18	fem-1xhim8, snpc-1.3
8	fem-1xhim8, snpc-1.3
15	fem-1xhim8, snpc-1.3
18	fem-1xhim8, snpc-1.3
24	fem-1xhim8, snpc-1.3
26	fem-1xhim8, snpc-1.3
24	fem-1xhim8, snpc-1.3
20	fem-1xhim8, snpc-1.3
15	fem-1xhim8, snpc-1.3
14	fem-1xhim8, snpc-1.3
10	fem-1xhim8, snpc-1.3
16	fem-1xhim8, snpc-1.3
14	fem-1xhim8, snpc-1.3
