# Supplementary material for: SNPC-1.3 is a sex-specific transcription factor that drives male piRNA expression in C. elegans
Source: eLife. 2021 Feb 15;10:e60681. doi: 10.7554/eLife.60681 (PMC7884074; doi:10.7554/eLife.60681)
Supplement: Figure 6—source data 3. [file elife-60681-fig6-data3.xlsx]

## Sheet: Sheet1
N2-07	diff		snpc-13-05	diff
153	25.5		71	20.1733			11.3333	15.1733
141	23.5		132	30.34			18.5722	18.7598
200	33.3333		111	26.84
75	12.5		99	24.84
73	12.1667		69	19.84
125	20.8333		41	15.1733
74	12.3333		46	16.0067
105	17.5		31	13.5067
152	25.3333		76	21.0067
88	14.6667		52	17.0067
74	12.3333		59	18.1733
60	10		62	18.6733
57	9.5		34	14.0067
58	9.66667		62	18.6733
43	7.16667		33	13.84
43	7.16667		68	19.6733
178	29.6667		78	21.34
99	16.5		93	23.84
99	16.5		49	16.5067
111	18.5		69	19.84
93	15.5		78	21.34
121	20.1667		37	14.5067
144	24		51	16.84
142	23.6667		63	18.84
193	32.1667		43	15.5067
98	16.3333		43	15.5067			0.636364
123	20.5		38	14.6733
157	26.1667		200	0
171	28.5		200	0
180	30		200	0
89	14.8333		200	0
100	16.6667		200	0
89	14.8333		200	0
75	12.5		200	0
63	10.5		200	0
95	15.8333		200	0
100	16.6667		200	0
132	22		200	0
158	26.3333		200	0
83	13.8333		200	0
167	27.8333		200	0
192	32		200	0
67	11.1667		200	0
172	28.6667
123	20.5
130	21.6667
139	23.1667
200	33.3333
52	8.66667
52	8.66667
66	11
90	15
109	18.1667
99	16.5
48	8
100	16.6667
176	29.3333
69	11.5
93	15.5
128	21.3333
200	0
200	0
200	0
200	0
200	0
200	0
200	0
200	0
200	0
200	0
200	0
200	0
200	0
200	0
200	0
200	0
200	0
200	0
200	0
200	0
200	0
200	0
200	0
200	0
200	0
200	0
200	0
200	0
200	0
200	0
200	0
200	0
200	0
200	0
200	0
200	0
200	0
200	0
200	0

## Sheet: Sheet5
spike growth start (frame)	spikes fuse (frame)	pseudopod start (frame)	mat pseud (frame)	motility end start (frame)	genotype	id number	spermatid stage	spindle intermediate stage	pseudopod stage	non-motile stage
16		21	110	200	N2-06	14	2.66667	0.833333	29.8333	0
15		23	67	200	N2-06	13	2.5	1.33333	29.5	0
8		21		200	N2-06	24	1.33333	2.16667	29.8333	0			average	stdev	t-test (p-value)
10	19	25	68	200	N2-06	12	1.66667	2.5	29.1667	0			spindle intermediate stage
22	38	40	91	183	N2-06	22	3.66667	3	23.8333	2.83333		wildtype	6.19136	4.46561	0.004334
4		22	55	200	N2-06	11	0.666667	3	29.6667	0		snpc-1.3(lof)	2.91071	3.67157
23	36	43		200	N2-06	8	3.83333	3.33333	26.1667	0			Pseudopod stage
18	36	40	90	200	N2-06	21	3	3.66667	26.6667	0		wildtype	23.963	6.44559	< .00001
58		82	112	200	N2-06	3	9.66667	4	19.6667	0		snpc-1.3(lof)	7.26786	3.67157
13	19	41	59	200	N2-06	10	2.16667	4.66667	26.5	0			non-motile stage
7	25	38	102	200	N2-06	25	1.16667	5.16667	27	0		wildtype	1.26543	4.64952	< .00001
11	32	43	129	200	N2-06	7	1.83333	5.33333	26.1667	0		snpc-1.3(lof)	15.4881	5.43422
5		37	85	200	N2-06	9	0.833333	5.33333	27.1667	0
4		37	94	200	N2-06	5	0.666667	5.5	27.1667	0
7		41		200	N2-06	6	1.16667	5.66667	26.5	0
14		52	86	173	N2-06	2	2.33333	6.33333	20.1667	4.5
10	45	48		200	N2-06	1	1.66667	6.33333	25.3333	0
15	44	55		57	N2-06	16	2.5	6.66667	0.333333	23.8333
3		47	79	200	N2-06	15	0.5	7.33333	25.5	0
1	37	46	72	182	N2-06	4	0.166667	7.5	22.6667	3
3		48	90	200	N2-06	23	0.5	7.5	25.3333	0
9	47	57	94	200	N2-06	20	1.5	8	23.8333	0
1	22	53	71	200	N2-06	19	0.166667	8.66667	24.5	0
24		78	132	200	N2-06	27	4	9	20.3333	0
1	15	56	96	200	N2-06	17	0.166667	9.16667	24	0
6	22	69	97	200	N2-06	18	1	10.5	21.8333	0
2	21	150	200	200	N2-06	26	0.333333	24.6667	8.33333	0
98		98	98	98	snpc13-05	24	16.3333	0	0	17
94	94	94	94	94	snpc13-05	17	15.6667	0	0	17.6667
67		67	59	67	snpc13-05	26	11.1667	0	0	22.1667
39	39	39	39	39	snpc13-05	1	6.5	0	0	26.8333
0	0	0	0	0	snpc13-05	19	0	0	0	33.3333
129		129	148	148	snpc13-05	28	21.5	0	3.16667	8.66667
105		105	106	133	snpc13-05	12	17.5	0	4.66667	11.1667
75		75	79	119	snpc13-05	13	12.5	0	7.33333	13.5
28		28	40	104	snpc13-05	11	4.66667	0	12.6667	16
32		32	44	131	snpc13-05	18	5.33333	0	16.5	11.5
28		28	155	155	snpc13-05	16	4.66667	0	21.1667	7.5
60		62	72	100	snpc13-05	25	10	0.333333	6.33333	16.6667
50		54	90	105	snpc13-05	21	8.33333	0.666667	8.5	15.8333
135	141	141	141	141	snpc13-05	20	22.5	1	0	9.83333
63		73	94	120	snpc13-05	14	10.5	1.66667	7.83333	13.3333
11	17	22	48	103	snpc13-05	5	1.83333	1.83333	13.5	16.1667
62		77		77	snpc13-05	27	10.3333	2.5	0	20.5
26		41	66	119	snpc13-05	6	4.33333	2.5	13	13.5
27		43	49	103	snpc13-05	23	4.5	2.66667	10	16.1667
31		61	67	100	snpc13-05	9	5.16667	5	6.5	16.6667
1		35	71	104	snpc13-05	10	0.166667	5.66667	11.5	16
27		62	96	141	snpc13-05	15	4.5	5.83333	13.1667	9.83333
37		74	92	109	snpc13-05	8	6.16667	6.16667	5.83333	15.1667
2		40	49	116	snpc13-05	3	0.333333	6.33333	12.6667	14
25		69	84	112	snpc13-05	2	4.16667	7.33333	7.16667	14.6667
7		62	85	104	snpc13-05	22	1.16667	9.16667	7	16
1		59	59	109	snpc13-05	4	0.166667	9.66667	8.33333	15.1667
28		107	112	147	snpc13-05	7	4.66667	13.1667	6.66667	8.83333

## Sheet: Sheet3
start	stop	start	mature	spermatid	spike int.	pseud. mat.							spermatid	spike int.	pseud. mat.
16	53	55	59	16	39	4	196	27.1186	90.6977	9.30233		N2	31.4811	69.3907	30.6093
59	76	82	88	59	23	6	194	67.0455	79.3103	20.6897		snpc-1.3	45.2648	77.8345	22.1655
12	36	43	53	12	31	10	190	22.6415	75.6098	24.3902		N2 stdev	3.95696	4.56115	4.56115
19	51	53	58	19	34	5	195	32.7586	87.1795	12.8205		snpc stdev	20.1978	4.7284	4.7284
12	44	50	59	12	38	9	191	20.339	80.8511	19.1489
15	40	46	49	15	31	3	197	30.6122	91.1765	8.82353
14	38	41	56	14	27	15	185	25	64.2857	35.7143
30	47	47	51	30	17	4	196	58.8235	80.9524	19.0476
14	37	46	59	14	32	13	187	23.7288	71.1111	28.8889
23	40	43	52	23	20	9	191	44.2308	68.9655	31.0345
17	21	21	43	17	4	22	178	39.5349	15.3846	84.6154
4	52	52	86	4	48	34	166	4.65116	58.5366	41.4634
22	27	27	35	22	5	8	192	62.8571	38.4615	61.5385
29	52	151	187	29	122	36	164	15.508	77.2152	22.7848
13	55	57	65	13	44	8	192	20	84.6154	15.3846
19	41	41	70	19	22	29	171	27.1429	43.1373	56.8627
12	69	69	91	12	57	22	178	13.1868	72.1519	27.8481
6		200	200	6	194	0	200	3	100	0
29		69	81	29	40	12	188	35.8025	76.9231	23.0769
27		59	64	27	32	5	195	42.1875	86.4865	13.5135
52		76	79	52	24	3	197	65.8228	88.8889	11.1111
76		200	200	76	124	0	200	38	100	0
136		200	200	136	64	0	200	68	100	0
94		200	200	94	106	0	200	47	100	0
30		47	57	30	17	10	190	52.6316	62.963	37.037
38		43	46	38	5	3	197	82.6087	62.5	37.5
22		61	79	22	39	18	182	27.8481	68.4211	31.5789
48		60	70	48	12	10	190	68.5714	54.5455	45.4545
66		200	200	66	134	0	200	33	100	0
24		85	88	24	61	3	197	27.2727	95.3125	4.6875
65		78	94	65	13	16	184	69.1489	44.8276	55.1724
38		59	94	38	21	35	165	40.4255	37.5	62.5
21		50	55	21	29	5	195	38.1818	85.2941	14.7059
36		86	120	36	50	34	166	30	59.5238	40.4762

## Sheet: Sheet2
27
48
38
27
37
37
150
58
28
42
21
50
63
51
62
80
168
57
