# Supplementary material for: SNPC-1.3 is a sex-specific transcription factor that drives male piRNA expression in C. elegans
Source: eLife. 2021 Feb 15;10:e60681. doi: 10.7554/eLife.60681 (PMC7884074; doi:10.7554/eLife.60681)
Supplement: Supplementary file 1. — Related to Figure 3. [file elife-60681-supp1.xlsx]

## Sheet: WT48h_vs_WT72h
gene ID	gene name	chromosome	gene start	gene end	strand	adj. pvalue (BH)	log2(fold change)	WT 48h replicate 1	WT 48h replicate 2	WT 48h replicate 3	WT 72h replicate 1	WT 72h replicate 2	WT 72h replicate 3
WBGene00045518	21ur-5153	IV	5723096	5723116	-1	0.208329	1.9661	2.82588	5.87892	2.76233	0.502747	1.79359	0.711217
WBGene00045519	21ur-4348	IV	15836817	15836837	1	0.104466	-1.58178	5.65176	4.40919	2.76233	4.52472	19.7295	14.2243
WBGene00045520	21ur-3279	IV	15576143	15576163	1	1	0	0	0	0	0	0	0
WBGene00045521	21ur-4491	IV	16545939	16545959	1	1.06811e-06	3.61182	19.7812	33.8038	35.9103	2.01099	3.13879	2.13365
WBGene00045522	21ur-1293	IV	14284757	14284777	-1	0.35088	-1.59776	0	1.46973	2.76233	4.02197	4.03559	4.97852
WBGene00045523	21ur-4900	IV	15101897	15101917	-1	0.0351706	3.5186	8.47764	5.87892	2.76233	0	1.3452	0
WBGene00045524	21ur-2872	IV	15745804	15745824	1	4.72175e-06	-1.25703	48.04	49.9709	60.7713	114.626	110.306	153.623
WBGene00045525	21ur-4886	IV	14087254	14087274	-1	1.11238e-45	3.94495	536.917	401.237	298.332	25.1373	32.2847	22.0477
WBGene00045526	21ur-3726	IV	14006014	14006034	1	0.00094983	-1.82524	8.47764	7.34866	13.8117	30.6675	29.1459	41.2506
WBGene00045527	21ur-3449	IV	15955239	15955259	-1	0.507824	-1.44395	0	1.46973	0	2.51373	3.13879	0.711217
WBGene00045528	21ur-4318	IV	5914546	5914566	-1	0.554019	2.03409	0	1.46973	0	0	0.448399	0
WBGene00045529	21ur-3987	IV	13689238	13689258	-1	4.1331e-10	1.56554	1333.82	1503.53	1903.25	491.686	471.267	639.384
WBGene00045530	21ur-770	IV	16391830	16391850	-1	2.76255e-44	4.52881	2164.63	2905.66	2414.28	85.4669	104.477	135.131
WBGene00045531	21ur-3262	IV	15774176	15774196	1	0.202956	1.32493	2.82588	13.2276	19.3363	8.54669	4.03559	1.42243
WBGene00045532	21ur-116	IV	5101205	5101225	-1	0.677385	0.962228	0	4.40919	0	0.502747	0.448399	2.13365
WBGene00045533	21ur-338	IV	16887155	16887175	-1	4.02666e-09	1.53523	158.249	149.913	110.493	56.8104	47.0819	40.5394
WBGene00045534	21ur-248	IV	17172196	17172216	-1	2.48975e-18	3.60163	110.209	82.3049	55.2467	6.03296	6.72598	7.82339
WBGene00045535	21ur-2337	IV	14055385	14055405	-1	0.279623	-1.31652	0	1.46973	8.287	6.53571	8.51957	7.11217
WBGene00045536	21ur-2148	IV	14561149	14561169	1	0.340682	2.87776	2.82588	1.46973	0	0	0.448399	0
WBGene00045537	21ur-3280	IV	5759813	5759833	1	0.132377	0.349211	155.423	173.428	185.076	145.294	132.278	125.885
WBGene00045538	21ur-783	IV	16661836	16661856	1	6.31935e-10	1.66784	316.499	407.116	287.283	93.5109	85.1957	142.955
WBGene00045539	21ur-2502	IV	15396845	15396865	1	0.0317443	-0.501951	271.285	223.399	174.027	293.101	301.772	352.764
WBGene00045540	21ur-2533	IV	14259503	14259523	1	4.56725e-29	4.09649	203.463	176.368	132.592	10.5577	13.452	4.97852
WBGene00045541	21ur-2515	IV	16346305	16346325	-1	0.855343	-0.218915	8.47764	13.2276	8.287	12.0659	14.7972	9.24582
WBGene00045542	21ur-194	IV	16062799	16062819	-1	0.0360811	0.585241	681.037	605.529	392.251	324.272	334.505	463.002
WBGene00045543	21ur-1754	IV	13631496	13631516	1	0.641729	2.98661	0	1.46973	0	0	0	0
WBGene00045544	21ur-3162	IV	6188675	6188695	1	0.0597317	0.774071	42.3882	57.3195	38.6727	32.1758	28.6975	21.3365
WBGene00045545	21ur-4859	IV	15298501	15298521	1	3.16993e-09	4.64993	22.6071	26.4552	44.1973	1.00549	1.79359	0.711217
WBGene00045546	21ur-3313	IV	16807628	16807648	-1	0.00585844	2.12141	11.3035	16.167	19.3363	5.53021	1.79359	3.55609
WBGene00045547	21ur-2522	IV	5899411	5899431	-1	4.30535e-11	3.31565	56.5176	38.213	35.9103	4.02197	3.58719	5.68974
WBGene00045548	21ur-2768	IV	16717897	16717917	1	0.000167335	2.73882	25.4329	11.7578	22.0987	1.50824	3.58719	3.55609
WBGene00045549	21ur-4660	IV	6992052	6992072	-1	#N/A	#N/A	0	0	0	0	0	0
WBGene00045550	21ur-380	IV	16891832	16891852	1	0.954007	0.284418	2.82588	0	0	1.00549	0.896797	0
WBGene00045551	21ur-127	IV	15583334	15583354	1	#N/A	#N/A	0	0	0	0	0	0
WBGene00045552	21ur-3009	IV	13839715	13839735	-1	1.44006e-07	-1.24258	87.6023	85.2444	102.206	225.23	216.128	204.119
WBGene00045553	21ur-4396	IV	14151064	14151084	1	2.78242e-15	-1.96509	169.553	155.792	113.256	487.161	522.833	710.506
WBGene00045554	21ur-3929	IV	15605848	15605868	1	0.0287221	-0.573067	104.558	121.988	113.256	168.42	149.765	192.029
WBGene00045555	21ur-4158	IV	16203925	16203945	-1	0.962017	-0.406409	0	0	0	0.502747	0.448399	0.711217
WBGene00045556	21ur-972	IV	15630784	15630804	1	0.0569069	-3.17236	0	0	0	4.52472	3.13879	3.55609
WBGene00045557	21ur-4509	IV	15655850	15655870	-1	0.0725746	1.82798	2.82588	16.167	2.76233	2.51373	2.24199	2.13365
WBGene00045558	21ur-4358	IV	13726773	13726793	-1	0.0500499	-0.629113	42.3882	44.0919	52.4843	75.412	73.5374	64.0095
WBGene00045559	21ur-4032	IV	17151826	17151846	-1	0.0664519	-0.53393	1172.74	1447.69	1022.06	1569.57	1524.56	2189.13
WBGene00045560	21ur-3396	IV	14509444	14509464	-1	0.776094	0.238204	22.6071	19.1065	22.0987	20.6126	21.5231	10.6683
WBGene00045561	21ur-4184	IV	14159840	14159860	-1	0.400471	-1.66784	0	1.46973	0	1.50824	2.69039	3.55609
WBGene00045562	21ur-231	IV	15907905	15907925	-1	0.0846499	3.1541	2.82588	2.93946	8.287	1.00549	0.448399	0
WBGene00045563	21ur-4606	IV	16898307	16898327	1	0.000234586	-0.812976	146.946	141.094	138.117	274.5	239.893	233.279
WBGene00045564	21ur-4026	IV	14432370	14432390	1	1.66542e-34	4.47372	129.991	160.201	149.166	4.52472	7.17438	8.5346
WBGene00045565	21ur-1557	IV	14342516	14342536	1	0.504313	2.06874	0	1.46973	2.76233	0.502747	0.448399	0
WBGene00045566	21ur-4925	IV	16984283	16984303	1	0.02445	2.8421	11.3035	11.7578	2.76233	0	2.24199	1.42243
WBGene00045567	21ur-4269	IV	15777866	15777886	1	2.46204e-23	3.80463	98.9059	114.639	93.9193	7.5412	5.82918	9.24582
WBGene00045568	21ur-3115	IV	14122587	14122607	-1	#N/A	#N/A	0	0	0	0	0	0
WBGene00045569	21ur-4858	IV	14039587	14039607	-1	1	-0.000199734	22.6071	39.6827	35.9103	31.673	35.8719	33.4272
WBGene00045570	21ur-422	IV	15182599	15182619	-1	0.000220133	0.813672	259.981	207.232	196.126	129.206	106.27	141.532
WBGene00045571	21ur-3283	IV	15424750	15424770	1	0.13537	-0.551545	81.9506	60.259	35.9103	104.069	86.5409	69.6993
WBGene00045572	21ur-66	IV	14979662	14979682	1	9.71845e-22	2.53833	3382.58	2805.72	2491.62	379.574	468.577	647.207
WBGene00045573	21ur-3960	IV	14977301	14977321	-1	8.21386e-10	-2.00682	28.2588	26.4552	35.9103	118.145	118.377	120.907
WBGene00045574	21ur-3455	IV	4986105	4986125	-1	9.13203e-05	3.67019	14.1294	23.5157	19.3363	1.50824	2.69039	0
WBGene00045575	21ur-3399	IV	16158130	16158150	1	2.68233e-13	-2.02636	59.3435	76.426	58.009	285.057	280.249	238.969
WBGene00045576	21ur-1907	IV	14583398	14583418	1	0.473145	0.356948	19.7812	32.3341	44.1973	21.6181	26.9039	27.0262
WBGene00045577	21ur-341	IV	13746337	13746357	-1	0.148253	-2.89359	0	0	0	2.51373	5.82918	0.711217
WBGene00045578	21ur-4400	IV	14725934	14725954	-1	3.93227e-30	3.60712	146.946	158.731	135.354	13.0714	13.452	9.24582
WBGene00045579	21ur-213	IV	13939645	13939665	-1	0.00756736	1.01343	53.6917	49.9709	44.1973	21.6181	25.5587	26.315
WBGene00045580	21ur-3922	IV	15671231	15671251	-1	0.500125	-0.203365	209.115	154.322	232.036	224.728	239.445	211.231
WBGene00045581	21ur-3683	IV	16814136	16814156	1	4.59017e-05	-1.47874	53.6917	27.9249	55.2467	122.167	148.42	94.5919
WBGene00045582	21ur-3176	IV	15623587	15623607	-1	0.0465111	-1.03125	19.7812	13.2276	11.0493	36.7005	24.6619	27.0262
WBGene00045583	21ur-4174	IV	14878399	14878419	1	0.933214	-0.355863	2.82588	0	0	1.50824	0.896797	0.711217
WBGene00045584	21ur-4213	IV	5497568	5497588	-1	0.0151157	2.36425	11.3035	5.87892	13.8117	2.01099	2.24199	1.42243
WBGene00045585	21ur-687	IV	13839712	13839732	-1	1.01697e-07	-1.25577	87.6023	85.2444	99.444	225.23	216.128	204.119
WBGene00045586	21ur-5133	IV	15779938	15779958	1	0.758824	-0.651262	0	4.40919	0	4.02197	2.24199	2.84487
WBGene00045587	21ur-4538	IV	13840064	13840084	1	1	-0.0306135	0	0	2.76233	2.01099	0.448399	0
WBGene00045588	21ur-4731	IV	6033172	6033192	-1	0.0157299	-0.88507	45.2141	30.8644	33.148	73.9037	49.7722	74.6778
WBGene00045589	21ur-1571	IV	14893381	14893401	-1	0.530828	1.59011	0	2.93946	2.76233	1.00549	0.896797	0
WBGene00045590	21ur-5440	IV	15248660	15248680	-1	1	0	0	0	0	0	0	0
WBGene00045591	21ur-3641	IV	13604366	13604386	-1	0.793745	0.621519	2.82588	1.46973	2.76233	0.502747	1.79359	2.13365
WBGene00045592	21ur-4673	IV	5336132	5336152	1	0.118021	-0.755266	19.7812	22.046	19.3363	36.1978	34.0783	34.1384
WBGene00045593	21ur-2000	IV	16109395	16109415	1	0.337399	0.156703	647.127	555.558	593.902	519.84	525.075	560.439
WBGene00045594	21ur-2563	IV	15975938	15975958	1	0.159429	-0.858595	16.9553	17.6368	33.148	42.2307	36.3203	41.9618
WBGene00045595	21ur-676	IV	5284109	5284129	-1	0.180118	0.463903	121.513	74.9563	80.1077	81.4449	63.2242	51.9188
WBGene00045596	21ur-5434	IV	16376343	16376363	1	0.00299724	5.1899	2.82588	7.34866	11.0493	0	0.448399	0
WBGene00045597	21ur-2918	IV	14639622	14639642	-1	0.0144727	-1.7342	8.47764	4.40919	5.52467	18.0989	17.4875	22.7589
WBGene00045598	21ur-3144	IV	5882012	5882032	-1	0.577077	-0.976789	0	1.46973	5.52467	6.53571	3.58719	2.84487
WBGene00045599	21ur-3790	IV	14717683	14717703	1	1.10439e-54	3.81693	779.943	753.972	701.633	54.7994	49.3238	54.7637
WBGene00045600	21ur-3069	IV	5717445	5717465	1	0.486497	0.296359	45.2141	49.9709	41.435	40.7225	36.7687	34.8496
WBGene00045601	21ur-1104	IV	14917339	14917359	1	0.678654	-0.93151	0	4.40919	0	5.02747	2.69039	2.84487
WBGene00045602	21ur-4930	IV	16838285	16838305	-1	0.0277721	-3.26941	2.82588	0	0	8.54669	8.96797	5.68974
WBGene00045603	21ur-5393	IV	15439660	15439680	-1	0.163496	2.58926	5.65176	1.46973	2.76233	1.00549	0.448399	0
WBGene00045604	21ur-4121	IV	15262572	15262592	-1	0.00065382	4.0574	5.65176	10.2881	19.3363	0	1.3452	0.711217
WBGene00045605	21ur-1446	IV	13889765	13889785	-1	2.0788e-28	3.30877	231.722	210.172	229.274	31.1703	22.4199	12.8019
WBGene00045606	21ur-4963	IV	9131636	9131656	-1	6.36917e-06	1.45222	67.8212	85.2444	88.3947	30.6675	28.2491	29.8711
WBGene00045607	21ur-3239	IV	14324699	14324719	1	0.0388986	-2.75575	0	0	5.52467	13.0714	8.51957	8.5346
WBGene00045608	21ur-4548	IV	15811661	15811681	-1	0.215297	1.75592	2.82588	2.93946	5.52467	1.00549	0.896797	1.42243
WBGene00045609	21ur-2932	IV	15233513	15233533	1	2.0076e-05	-0.751232	197.812	229.278	223.749	381.585	343.473	376.945
WBGene00045610	21ur-1584	IV	16608169	16608189	-1	2.202e-07	-1.22487	477.574	279.249	259.659	736.021	694.569	930.983
WBGene00045611	21ur-620	IV	16373091	16373111	1	0.459803	-1.00207	0	8.81839	0	7.03845	8.96797	6.40095
WBGene00045612	21ur-5367	IV	14405356	14405376	1	0.00455761	-2.97433	2.82588	0	5.52467	21.6181	13.452	17.7804
WBGene00045613	21ur-2568	IV	15841474	15841494	1	0.802009	1.30233	0	1.46973	0	0	0.896797	0
WBGene00045614	21ur-2293	IV	15670608	15670628	-1	5.81644e-05	4.19333	25.4329	5.87892	22.0987	0.502747	0.448399	2.13365
WBGene00045615	21ur-310	IV	16522239	16522259	1	5.53152e-32	4.49682	158.249	217.52	165.74	5.53021	6.72598	12.8019
WBGene00045616	21ur-344	IV	15208441	15208461	-1	0.00884207	1.76528	5.65176	20.5762	22.0987	5.02747	5.82918	3.55609
WBGene00045617	21ur-5229	IV	5967089	5967109	1	0.535617	1.48702	2.82588	0	5.52467	0	1.3452	1.42243
WBGene00045618	21ur-3525	IV	15099767	15099787	1	0.0102101	-2.41137	2.82588	4.40919	0	16.0879	15.694	12.8019
WBGene00045619	21ur-5354	IV	5614160	5614180	-1	0.996379	0.273882	0	0	0	1.00549	0	0
WBGene00045620	21ur-2363	IV	14286678	14286698	-1	0.00931251	-1.58917	8.47764	10.2881	5.52467	24.1318	27.3523	24.8926
WBGene00045621	21ur-5452	IV	15144960	15144980	-1	0.14412	-2.98665	0	0	0	2.51373	3.13879	4.2673
WBGene00045622	21ur-2954	IV	16004254	16004274	1	4.87731e-08	-1.49153	56.5176	57.3195	46.9597	153.338	139.9	163.58
WBGene00045623	21ur-3951	IV	15339112	15339132	1	1	0	0	0	0	0	0	0
WBGene00045624	21ur-3736	IV	14634033	14634053	1	0.0223116	-0.720727	73.4729	76.426	60.7713	107.085	122.861	120.196
WBGene00045625	21ur-419	IV	5178803	5178823	-1	1.64607e-51	3.76509	228.896	288.067	312.144	20.6126	21.0747	19.2029
WBGene00045626	21ur-5135	IV	15723563	15723583	1	0.735255	-0.780144	2.82588	0	2.76233	2.51373	4.03559	1.42243
WBGene00045627	21ur-4966	IV	17202418	17202438	-1	3.12379e-06	3.66004	16.9553	16.167	22.0987	1.00549	1.3452	2.13365
WBGene00045628	21ur-3440	IV	15269715	15269735	-1	0.212503	0.376768	3396.71	4125.54	3361.76	2387.04	2385.93	3614.4
WBGene00045629	21ur-2914	IV	15172097	15172117	1	1.52188e-17	2.00092	163.901	182.247	198.888	48.7664	45.7367	41.2506
WBGene00045630	21ur-2195	IV	15252554	15252574	1	#N/A	#N/A	0	0	0	0	0	0
WBGene00045631	21ur-4580	IV	14259502	14259522	1	4.56725e-29	4.09649	203.463	176.368	132.592	10.5577	13.452	4.97852
WBGene00045632	21ur-2136	IV	5435663	5435683	1	0.893016	1.09186	0	0	0	0	0.448399	0
WBGene00045633	21ur-5345	IV	14395091	14395111	-1	0.119855	-1.07545	2.82588	10.2881	11.0493	20.6126	18.8327	13.5131
WBGene00045634	21ur-3163	IV	15711282	15711302	1	0.0807775	3.99461	0	5.87892	2.76233	0.502747	0	0
WBGene00045635	21ur-98	IV	13800750	13800770	-1	0.00313104	4.51665	5.65176	11.7578	5.52467	0.502747	0.448399	0
WBGene00045636	21ur-629	IV	15340252	15340272	1	3.21355e-06	-0.956402	127.165	99.9417	107.731	215.176	217.922	207.675
WBGene00045637	21ur-3513	IV	14265051	14265071	1	8.63774e-06	-1.00221	118.687	102.881	104.969	215.176	205.815	229.723
WBGene00045638	21ur-4117	IV	13676365	13676385	-1	3.1543e-05	1.55605	45.2141	54.3801	71.8207	23.6291	16.5907	17.7804
WBGene00045639	21ur-1324	IV	14131823	14131843	1	0.000308455	-1.01196	373.016	470.314	323.193	560.562	751.964	1052.6
WBGene00045640	21ur-2876	IV	15934211	15934231	-1	0.576469	-1.48513	0	0	0	2.01099	1.3452	0
WBGene00045641	21ur-4617	IV	17237035	17237055	1	0.0124947	2.40949	14.1294	4.40919	16.574	2.01099	2.69039	1.42243
WBGene00045642	21ur-3810	IV	15314888	15314908	-1	0.597917	0.507679	5.65176	8.81839	19.3363	9.04944	7.62278	6.40095
WBGene00045643	21ur-2772	IV	15361319	15361339	1	0.000496545	2.1474	19.7812	33.8038	24.861	7.03845	3.58719	7.82339
WBGene00045644	21ur-3853	IV	5133083	5133103	-1	0.0588734	3.33823	5.65176	0	27.6233	0	1.79359	1.42243
WBGene00045645	21ur-1572	IV	14764438	14764458	1	0.345065	-0.77615	11.3035	8.81839	2.76233	12.0659	12.5552	15.6468
WBGene00045646	21ur-4784	IV	14220765	14220785	-1	0.00519001	-1.98469	2.82588	7.34866	5.52467	21.1154	21.0747	24.8926
WBGene00045647	21ur-101	IV	16002350	16002370	-1	0.00656527	2.53968	16.9553	7.34866	11.0493	1.50824	2.24199	2.13365
WBGene00045648	21ur-4235	IV	14976698	14976718	-1	0.313364	-0.798597	16.9553	4.40919	19.3363	20.1099	30.0427	14.9356
WBGene00045649	21ur-198	IV	5891934	5891954	-1	2.35578e-31	3.93414	135.642	133.746	110.493	7.03845	9.86477	7.82339
WBGene00045650	21ur-2547	IV	15251949	15251969	1	0.518865	0.48192	5.65176	20.5762	19.3363	13.5742	9.86477	10.6683
WBGene00045651	21ur-1325	IV	14233592	14233612	-1	1.21014e-05	-1.01509	76.2988	64.6682	82.87	159.873	146.178	137.265
WBGene00045652	21ur-378	IV	15694953	15694973	-1	8.22529e-05	-1.3765	737.555	1236.04	560.754	1464	2263.52	2874.03
WBGene00045653	21ur-1257	IV	5769282	5769302	-1	0.134479	1.26377	14.1294	13.2276	8.287	3.51923	4.03559	7.82339
WBGene00045654	21ur-3621	IV	16887548	16887568	-1	2.97619e-17	3.78774	62.1694	61.7287	66.296	6.53571	4.03559	2.84487
WBGene00045655	21ur-2179	IV	6042267	6042287	1	1.19137e-06	-1.43824	62.1694	88.1839	52.4843	155.349	163.217	248.926
WBGene00045656	21ur-2373	IV	14690558	14690578	1	0.463199	-1.89523	0	0	0	2.51373	1.3452	0.711217
WBGene00045657	21ur-4637	IV	15329175	15329195	-1	0.231974	-2.37356	0	0	0	1.50824	4.03559	0.711217
WBGene00045658	21ur-5357	IV	15105629	15105649	-1	0.0311774	-0.993231	11.3035	23.5157	30.3857	40.2197	49.7722	41.2506
WBGene00045659	21ur-1723	IV	14743056	14743076	1	0.627932	-1.14435	0	0	2.76233	1.50824	1.79359	2.13365
WBGene00045660	21ur-5403	IV	15245329	15245349	1	0.0905299	-3.0042	0	0	0	2.01099	3.13879	4.97852
WBGene00045661	21ur-780	IV	14027179	14027199	-1	0.13634	-2.76024	2.82588	0	0	5.02747	8.51957	2.84487
WBGene00045662	21ur-4553	IV	14372208	14372228	1	0.0226091	-1.24055	5.65176	13.2276	22.0987	36.1978	29.1459	31.2935
WBGene00045663	21ur-5087	IV	15877277	15877297	-1	0.0290406	-1.47861	14.1294	5.87892	5.52467	22.1208	20.6263	24.8926
WBGene00045664	21ur-553	IV	14650590	14650610	-1	0.000282973	3.7584	19.7812	8.81839	8.287	1.00549	0.896797	0.711217
WBGene00045665	21ur-3191	IV	16682557	16682577	1	9.2539e-13	1.87142	488.878	720.168	461.31	129.709	136.313	194.162
WBGene00045666	21ur-3306	IV	15099528	15099548	1	0.591184	0.662374	11.3035	4.40919	11.0493	5.02747	5.38078	5.68974
WBGene00045667	21ur-22	IV	5523137	5523157	1	0.00197398	2.33614	11.3035	17.6368	16.574	3.01648	2.69039	3.55609
WBGene00045668	21ur-1242	IV	5615248	5615268	1	0.698117	0.208075	138.468	104.351	49.722	65.8598	76.6762	112.372
WBGene00045669	21ur-1303	IV	16549514	16549534	1	0.825639	-0.157175	19.7812	36.7433	24.861	33.1813	36.7687	24.1814
WBGene00045670	21ur-2441	IV	4960928	4960948	1	0.0381235	-0.815668	25.4329	22.046	35.9103	50.2747	45.7367	46.2291
WBGene00045671	21ur-1935	IV	15165777	15165797	1	0.000473597	-2.69876	2.82588	4.40919	5.52467	33.684	32.7331	16.358
WBGene00045672	21ur-2786	IV	14607188	14607208	1	0.309207	-1.67568	0	1.46973	2.76233	7.03845	4.93238	1.42243
WBGene00045673	21ur-3453	IV	16089543	16089563	-1	6.22117e-06	3.05111	33.9106	48.5011	13.8117	7.03845	3.13879	1.42243
WBGene00045674	21ur-4693	IV	16003010	16003030	1	2.2164e-13	5.26574	53.6917	63.1984	27.6233	0.502747	0.896797	2.84487
WBGene00045675	21ur-2281	IV	16078374	16078394	-1	#N/A	#N/A	0	0	0	0	0	0
WBGene00045676	21ur-2712	IV	16467298	16467318	-1	5.9832e-19	2.46563	406.927	432.101	259.659	49.7719	65.0178	86.0573
WBGene00045677	21ur-5214	IV	15314218	15314238	1	0.315713	-2.06508	0	2.93946	0	7.5412	6.27758	2.13365
WBGene00045678	21ur-1078	IV	6060482	6060502	1	0.000528024	1.27058	367.365	207.232	143.641	78.4285	91.0249	128.019
WBGene00045679	21ur-3510	IV	5763845	5763865	1	0.398121	2.11824	0	0	5.52467	0.502747	0	0.711217
WBGene00045680	21ur-4163	IV	15578602	15578622	1	0.00943789	-2.21571	8.47764	2.93946	2.76233	24.6346	21.5231	14.9356
WBGene00045681	21ur-5291	IV	15288590	15288610	1	1.86241e-09	-1.03355	237.374	293.946	240.323	560.562	489.651	547.637
WBGene00045682	21ur-527	IV	13908848	13908868	-1	1.26023e-05	0.997379	305.195	329.22	295.57	144.791	144.833	178.515
WBGene00045683	21ur-5312	IV	14261634	14261654	-1	7.52202e-16	-1.9539	98.9059	104.351	44.1973	340.359	328.676	315.78
WBGene00045684	21ur-5385	IV	5498795	5498815	1	0.00324794	0.69961	257.155	295.416	193.363	144.791	143.488	176.382
WBGene00045685	21ur-1986	IV	17017613	17017633	-1	0.697909	1.05997	0	1.46973	2.76233	1.50824	0.448399	0
WBGene00045686	21ur-3553	IV	15568127	15568147	1	0.0320092	-2.15522	2.82588	4.40919	5.52467	22.1208	15.2456	19.9141
WBGene00045687	21ur-1049	IV	14364039	14364059	1	1.82418e-09	-1.69915	56.5176	39.6827	41.435	157.36	156.94	122.329
WBGene00045688	21ur-4041	IV	6179746	6179766	1	0.0370458	-0.534542	67.8212	83.7747	66.296	110.101	109.858	101.704
WBGene00045689	21ur-3409	IV	16059092	16059112	-1	0.636031	3.06976	0	0	2.76233	0	0	0
WBGene00045690	21ur-5085	IV	14415831	14415851	-1	0.994601	0.0491623	5.65176	7.34866	19.3363	12.0659	12.5552	4.97852
WBGene00045691	21ur-4812	IV	15780730	15780750	1	0.92514	0.194408	5.65176	2.93946	2.76233	2.01099	2.24199	5.68974
WBGene00045692	21ur-946	IV	16559891	16559911	-1	0.504925	-0.878882	0	8.81839	0	6.03296	7.17438	7.82339
WBGene00045693	21ur-2392	IV	16250433	16250453	-1	4.71061e-48	3.5906	469.096	520.285	665.722	57.3131	43.4947	35.5609
WBGene00045694	21ur-5223	IV	15794083	15794103	1	0.734125	0.562534	5.65176	1.46973	5.52467	3.51923	2.69039	1.42243
WBGene00045695	21ur-4519	IV	15145087	15145107	-1	0.0429912	1.35286	22.6071	14.6973	16.574	7.03845	3.58719	10.6683
WBGene00045696	21ur-2704	IV	15549833	15549853	-1	0.492264	-0.854854	2.82588	8.81839	0	5.02747	8.51957	11.3795
WBGene00045697	21ur-481	IV	14559347	14559367	1	0.144609	-0.52654	39.5623	47.0314	49.722	63.8488	62.7758	71.1217
WBGene00045698	21ur-5244	IV	13759239	13759259	1	0.731212	-0.995927	2.82588	0	0	1.00549	1.79359	2.13365
WBGene00045699	21ur-5080	IV	14680109	14680129	-1	4.39333e-17	2.52754	98.9059	102.881	118.78	18.0989	22.8683	13.5131
WBGene00045700	21ur-1137	IV	16186289	16186309	-1	0.000435209	-0.91978	76.2988	108.76	82.87	170.934	177.566	169.27
WBGene00045701	21ur-1580	IV	13718581	13718601	-1	3.85999e-05	2.22695	28.2588	29.3946	19.3363	5.53021	4.93238	6.40095
WBGene00045702	21ur-1740	IV	15904054	15904074	1	2.05975e-07	-2.17947	16.9553	17.6368	11.0493	65.8598	82.5053	63.2983
WBGene00045703	21ur-457	IV	13711639	13711659	1	0.0766807	-1.33321	5.65176	5.87892	8.287	17.5961	17.0391	14.2243
WBGene00045704	21ur-3053	IV	16105776	16105796	-1	#N/A	#N/A	0	0	0	0	0	0
WBGene00045705	21ur-3074	IV	14273692	14273712	-1	0.0139536	-0.677631	132.816	169.019	102.206	205.121	188.327	265.284
WBGene00045706	21ur-163	IV	15541886	15541906	-1	0.330508	-0.260559	322.15	335.099	254.135	350.917	330.918	416.062
WBGene00045707	21ur-1530	IV	16385416	16385436	-1	1.51405e-44	3.62822	268.459	276.309	226.511	20.1099	20.6263	22.0477
WBGene00045708	21ur-3591	IV	5495648	5495668	1	0.383223	-0.466303	31.0847	32.3341	5.52467	30.6675	32.7331	36.9833
WBGene00045709	21ur-5427	IV	14021300	14021320	-1	7.17999e-11	-1.31736	197.812	173.428	127.067	383.093	385.623	478.649
WBGene00045710	21ur-2758	IV	16198241	16198261	-1	3.10857e-30	3.39364	197.812	180.777	160.215	14.0769	18.8327	18.4916
WBGene00045711	21ur-2189	IV	5179876	5179896	-1	0.773028	0.51468	0	1.46973	11.0493	3.01648	2.24199	2.84487
WBGene00045712	21ur-877	IV	15751606	15751626	1	0.0332593	-0.894169	16.9553	27.9249	33.148	41.728	60.9822	43.3842
WBGene00045713	21ur-2188	IV	15362018	15362038	-1	0.467928	1.07325	2.82588	7.34866	2.76233	3.01648	0.896797	2.84487
WBGene00045714	21ur-895	IV	15263589	15263609	-1	0.00389789	-0.845688	189.334	204.293	113.256	280.03	280.698	359.876
WBGene00045715	21ur-764	IV	16781294	16781314	-1	0.0548673	-1.29475	11.3035	8.81839	2.76233	18.0989	23.3167	15.6468
WBGene00045716	21ur-2080	IV	15710175	15710195	-1	1	0	0	0	0	0	0	0
WBGene00045717	21ur-3347	IV	16980347	16980367	1	0.936845	-0.369715	2.82588	0	0	2.01099	0.448399	0.711217
WBGene00045718	21ur-1995	IV	16393125	16393145	-1	0.784687	-0.427938	2.82588	2.93946	8.287	7.5412	5.38078	4.97852
WBGene00045719	21ur-927	IV	14244046	14244066	1	#N/A	#N/A	0	0	0	0	0	0
WBGene00045720	21ur-1318	IV	15543266	15543286	-1	0.18653	4.52594	0	1.46973	5.52467	0	0	0
WBGene00045721	21ur-1126	IV	15151533	15151553	1	0.671536	-0.195682	81.9506	64.6682	66.296	87.9806	78.9182	74.6778
WBGene00045722	21ur-4997	IV	15621889	15621909	1	0.9358	0.31535	2.82588	1.46973	0	1.50824	1.79359	0
WBGene00045723	21ur-368	IV	14582176	14582196	1	0.221833	-1.0802	11.3035	7.34866	0	12.5687	11.6584	16.358
WBGene00045724	21ur-1377	IV	14344298	14344318	1	0.858209	-0.328963	2.82588	5.87892	2.76233	3.51923	4.48399	7.82339
WBGene00045725	21ur-4839	IV	14757137	14757157	-1	0.362566	2.63336	5.65176	1.46973	0	0	0.448399	0.711217
WBGene00045726	21ur-4151	IV	16745635	16745655	1	2.68999e-31	3.06357	308.021	216.05	270.709	36.7005	22.8683	35.5609
WBGene00045727	21ur-719	IV	14463088	14463108	-1	0.939878	-0.147375	2.82588	2.93946	19.3363	12.5687	7.62278	5.68974
WBGene00045728	21ur-2397	IV	5078646	5078666	1	1.87227e-05	3.06198	22.6071	19.1065	16.574	1.50824	2.69039	2.84487
WBGene00045729	21ur-4447	IV	14977148	14977168	1	0.989855	0.326931	0	0	0	0.502747	0.448399	0
WBGene00045730	21ur-1475	IV	15142661	15142681	-1	0.0150151	-0.752617	381.494	335.099	248.61	401.192	479.787	748.2
WBGene00045731	21ur-2329	IV	16897143	16897163	-1	0.544997	0.222583	84.7764	102.881	60.7713	66.8653	68.1566	83.9236
WBGene00045732	21ur-4317	IV	6125885	6125905	1	0.81624	0.325836	5.65176	2.93946	38.6727	16.0879	13.0036	6.40095
WBGene00045733	21ur-4254	IV	5507693	5507713	-1	0.00129143	0.822802	124.339	179.307	124.305	68.8763	85.1957	93.1694
WBGene00045734	21ur-3918	IV	16133525	16133545	1	0.0655416	3.00817	8.47764	2.93946	2.76233	0	0.448399	1.42243
WBGene00045735	21ur-3996	IV	5864841	5864861	-1	0.0361427	-3.26086	0	1.46973	0	4.52472	9.41637	9.24582
WBGene00045736	21ur-1612	IV	13992256	13992276	1	0.000145284	-1.54742	28.2588	35.2735	24.861	98.0356	105.374	59.7422
WBGene00045737	21ur-3619	IV	16063301	16063321	1	9.66222e-06	3.0933	19.7812	24.9854	22.0987	4.52472	1.79359	1.42243
WBGene00045738	21ur-4550	IV	5828590	5828610	-1	0.635422	2.98693	0	1.46973	0	0	0	0
WBGene00045739	21ur-5063	IV	13839495	13839515	-1	0.0933403	1.71041	2.82588	11.7578	8.287	2.51373	2.69039	2.13365
WBGene00045740	21ur-4575	IV	13804023	13804043	-1	0.0906553	1.37836	25.4329	7.34866	16.574	2.51373	8.51957	7.11217
WBGene00045741	21ur-157	IV	16046621	16046641	-1	1.95717e-14	3.23521	62.1694	66.1379	71.8207	7.5412	7.17438	6.40095
WBGene00045743	21ur-5073	IV	5401360	5401380	-1	0.0214266	-0.852373	53.6917	23.5157	46.9597	63.3461	77.1246	71.8329
WBGene00045744	21ur-26	IV	16604476	16604496	-1	6.11107e-44	3.81766	248.678	198.414	267.946	18.6016	17.0391	14.2243
WBGene00045745	21ur-805	IV	13959485	13959505	1	0.092678	3.33981	8.47764	1.46973	5.52467	0	1.3452	0
WBGene00045746	21ur-1219	IV	15746171	15746191	1	8.43671e-05	0.615462	1099.27	1222.82	1546.91	859.194	853.751	809.365
WBGene00045747	21ur-4706	IV	16613941	16613961	1	1.01824e-53	4.84304	237.374	220.46	254.135	9.04944	9.86477	4.97852
WBGene00045748	21ur-4832	IV	5277283	5277303	-1	5.13389e-33	3.49412	152.598	214.581	182.314	16.0879	13.9004	19.9141
WBGene00045749	21ur-2613	IV	15372663	15372683	1	0.784687	2.02482	0	1.46973	0	0.502747	0	0
WBGene00045750	21ur-3704	IV	16597076	16597096	1	1.58217e-16	1.90972	180.856	196.944	140.879	45.2472	46.6335	47.6515
WBGene00045751	21ur-2649	IV	16838056	16838076	1	4.90673e-05	-2.17474	731.903	612.878	455.785	2375.48	2522.24	3232.48
WBGene00045752	21ur-909	IV	16450631	16450651	-1	0.0748935	-1.47935	8.47764	7.34866	2.76233	16.5906	14.7972	22.0477
WBGene00045753	21ur-2356	IV	16018174	16018194	-1	0.517473	-0.740378	2.82588	4.40919	5.52467	9.55218	6.72598	4.97852
WBGene00045754	21ur-3041	IV	15780191	15780211	-1	0.443725	-0.817595	11.3035	2.93946	2.76233	8.54669	9.86477	9.24582
WBGene00045755	21ur-506	IV	5078480	5078500	1	3.72928e-24	4.48439	101.732	138.155	127.067	6.03296	5.38078	4.97852
WBGene00045756	21ur-4821	IV	14333900	14333920	-1	7.61112e-05	-1.85718	5.65176	16.167	24.861	60.8323	58.2918	51.2076
WBGene00045757	21ur-4437	IV	16690917	16690937	1	0.00869803	-0.707818	101.732	123.457	118.78	206.629	145.281	214.788
WBGene00045758	21ur-133	IV	13992564	13992584	1	0.0396896	-3.29477	0	1.46973	0	11.5632	7.62278	4.2673
WBGene00045759	21ur-5218	IV	15694253	15694273	1	0.000764126	2.58961	5.65176	20.5762	27.6233	3.51923	2.69039	2.84487
WBGene00045760	21ur-4478	IV	16444230	16444250	1	0.260725	3.55862	0	1.46973	5.52467	0	0.448399	0
WBGene00045761	21ur-3127	IV	6045302	6045322	1	0.996588	-0.169968	2.82588	0	0	0.502747	0.896797	1.42243
WBGene00045762	21ur-1620	IV	17055693	17055713	-1	0.154867	0.79299	25.4329	17.6368	44.1973	15.0824	17.0391	16.358
WBGene00045763	21ur-3601	IV	15575155	15575175	-1	5.12351e-06	-1.35875	827.983	1067.02	751.355	1982.83	2041.56	2775.88
WBGene00045764	21ur-2085	IV	14364528	14364548	-1	0.988678	0.32427	0	0	0	0.502747	0.448399	0
WBGene00045765	21ur-4567	IV	16564731	16564751	-1	0.00677242	-2.25545	2.82588	7.34866	0	26.6456	17.0391	14.9356
WBGene00045766	21ur-279	IV	14200071	14200091	-1	0.105363	0.658376	39.5623	38.213	30.3857	20.1099	24.2135	24.8926
WBGene00045767	21ur-2961	IV	14581197	14581217	1	1	0	0	0	0	0	0	0
WBGene00045768	21ur-5176	IV	13934282	13934302	-1	0.0757035	-2.78994	2.82588	0	0	6.03296	4.48399	6.40095
WBGene00045769	21ur-1922	IV	13907798	13907818	1	0.609148	2.13446	0	1.46973	2.76233	0	0.896797	0
WBGene00045770	21ur-5265	IV	15603278	15603298	1	2.39453e-11	-1.21585	158.249	163.14	146.404	387.115	361.858	342.095
WBGene00045771	21ur-237	IV	5618249	5618269	-1	0.0123756	1.75681	16.9553	14.6973	13.8117	6.03296	3.13879	4.2673
WBGene00045772	21ur-4898	IV	15480018	15480038	-1	1.03931e-08	2.37878	59.3435	58.7892	74.583	17.5961	10.3132	8.5346
WBGene00045773	21ur-5304	IV	14684860	14684880	-1	0.658332	0.131224	288.24	299.825	400.538	313.714	299.082	285.909
WBGene00045774	21ur-4765	IV	15365487	15365507	1	1.02581e-06	-1.08092	389.972	508.527	359.103	894.386	776.626	1008.51
WBGene00045775	21ur-710	IV	14367796	14367816	1	0.00222777	-1.07071	149.772	170.489	292.807	521.851	482.477	276.663
WBGene00045776	21ur-3475	IV	14587996	14588016	1	0.407203	3.06892	0	4.40919	0	0	0.448399	0
WBGene00045777	21ur-3137	IV	16359723	16359743	1	0.0867756	4.13035	5.65176	4.40919	0	0	0.448399	0
WBGene00045778	21ur-1912	IV	14996317	14996337	-1	2.58539e-25	2.94704	161.075	142.564	176.789	21.1154	20.1779	20.6253
WBGene00045779	21ur-3112	IV	15405591	15405611	-1	3.78982e-05	0.973234	115.861	142.564	118.78	67.8708	61.4306	65.432
WBGene00045780	21ur-1878	IV	14636254	14636274	-1	0.000322121	-1.29118	53.6917	66.1379	74.583	197.077	152.456	126.597
WBGene00045781	21ur-2913	IV	14630200	14630220	-1	1.53077e-10	3.01422	53.6917	47.0314	55.2467	4.02197	5.82918	9.95704
WBGene00045782	21ur-4300	IV	15540450	15540470	1	9.50154e-05	-1.90064	16.9553	10.2881	8.287	44.7444	44.3915	39.8282
WBGene00045783	21ur-447	IV	13950576	13950596	1	0.68136	0.732268	0	7.34866	5.52467	4.52472	2.24199	1.42243
WBGene00045784	21ur-1	IV	16687107	16687127	1	0.598801	-0.380218	19.7812	8.81839	16.574	18.6016	19.2811	17.0692
WBGene00045785	21ur-520	IV	13994174	13994194	1	0.673091	-0.919082	2.82588	1.46973	0	3.51923	1.79359	2.84487
WBGene00045786	21ur-1018	IV	15209109	15209129	1	1.73496e-07	-1.17596	98.9059	114.639	124.305	269.472	253.345	241.814
WBGene00045787	21ur-3818	IV	14811354	14811374	1	0.0636655	-3.16575	0	0	0	3.01648	5.82918	2.13365
WBGene00045788	21ur-3836	IV	5969707	5969727	1	0.0525292	1.74304	5.65176	10.2881	24.861	2.51373	7.62278	1.42243
WBGene00045789	21ur-5257	IV	16391154	16391174	1	0.00330402	-0.654272	1379.03	1527.05	1336.97	1938.59	2029	2717.56
WBGene00045790	21ur-4773	IV	17237868	17237888	1	9.15085e-47	4.39674	966.451	799.534	654.673	30.1648	40.3559	44.8067
WBGene00045791	21ur-1977	IV	15866626	15866646	1	0.151069	-2.20931	2.82588	1.46973	0	9.04944	3.13879	7.82339
WBGene00045792	21ur-1072	IV	14357310	14357330	-1	5.26108e-19	1.99154	234.548	192.535	218.224	51.7829	54.7046	54.7637
WBGene00045793	21ur-3911	IV	13927085	13927105	1	0.624328	0.46722	11.3035	10.2881	24.861	11.0604	12.1068	9.24582
WBGene00045794	21ur-1550	IV	15284594	15284614	-1	0.456173	-2.01614	0	0	0	2.01099	2.24199	0.711217
WBGene00045795	21ur-289	IV	16442356	16442376	-1	0.893016	1.09186	0	0	0	0	0	0.711217
WBGene00045796	21ur-3106	IV	16812997	16813017	1	0.000335341	-1.25119	53.6917	57.3195	35.9103	100.549	122.413	132.998
WBGene00045797	21ur-2624	IV	17183863	17183883	1	0.365711	1.46322	5.65176	7.34866	0	2.51373	0.448399	2.13365
WBGene00045798	21ur-5413	IV	14000578	14000598	-1	3.16253e-09	3.35611	33.9106	126.397	46.9597	4.52472	8.51957	7.82339
WBGene00045799	21ur-2826	IV	14907156	14907176	1	2.00123e-05	-1.66518	31.0847	22.046	27.6233	102.56	82.9537	63.2983
WBGene00045800	21ur-986	IV	17025982	17026002	-1	0.377824	-1.4343	0	1.46973	5.52467	6.03296	4.93238	7.11217
WBGene00045801	21ur-1539	IV	5708524	5708544	1	0.999479	-0.119443	2.82588	0	0	1.50824	0.448399	0.711217
WBGene00045802	21ur-1687	IV	15175888	15175908	1	0.000398747	0.80627	1571.19	1447.69	1069.02	674.686	719.231	946.63
WBGene00045803	21ur-1769	IV	16877127	16877147	1	2.72506e-40	3.3929	265.633	214.581	218.224	23.1263	21.0747	22.0477
WBGene00045804	21ur-1354	IV	14983710	14983730	1	0.46308	-0.799687	0	5.87892	11.0493	10.5577	11.21	7.82339
WBGene00045805	21ur-3767	IV	5496271	5496291	1	2.72977e-17	1.83378	878.849	868.611	1049.69	225.733	255.587	303.69
WBGene00045806	21ur-1413	IV	15386654	15386674	-1	1.22467e-133	4.19624	2523.51	2433.87	2792.72	141.775	119.722	162.869
WBGene00045807	21ur-2250	IV	15306027	15306047	-1	1.2734e-09	1.63531	129.991	88.1839	99.444	34.1868	30.0427	36.9833
WBGene00045808	21ur-1627	IV	16747523	16747543	-1	0.893016	-0.939549	0	0	0	1.00549	1.3452	0
WBGene00045809	21ur-630	IV	13808747	13808767	1	0.641729	2.9866	0	1.46973	0	0	0	0
WBGene00045810	21ur-3054	IV	16045647	16045667	1	0.041625	-3.19661	0	0	2.76233	8.04395	5.82918	8.5346
WBGene00045811	21ur-1502	IV	13993009	13993029	1	0.965902	0.0476116	39.5623	26.4552	63.5337	35.1923	43.9431	41.2506
WBGene00045812	21ur-3808	IV	5202386	5202406	1	0.595035	0.579248	0	13.2276	8.287	4.52472	7.62278	3.55609
WBGene00045813	21ur-3942	IV	14503606	14503626	1	8.8711e-06	-0.855526	618.868	646.682	433.686	990.411	920.562	1178.49
WBGene00045814	21ur-5079	IV	14941256	14941276	1	0.888705	0.712247	2.82588	0	0	1.00549	0.448399	0
WBGene00045815	21ur-1284	IV	15141300	15141320	1	0.0208346	-3.71964	0	0	0	3.01648	3.13879	10.6683
WBGene00045816	21ur-73	IV	15234326	15234346	1	7.06608e-06	0.670753	1209.48	1161.09	1381.17	790.82	821.915	738.954
WBGene00045817	21ur-4793	IV	14407708	14407728	1	0.039358	1.38468	16.9553	20.5762	11.0493	7.5412	5.82918	5.68974
WBGene00045818	21ur-3584	IV	16871160	16871180	1	0.00218363	0.939807	228.896	261.612	342.529	160.376	144.833	128.019
WBGene00045819	21ur-5261	IV	14022038	14022058	-1	0.813803	-0.729276	2.82588	0	0	1.00549	2.24199	0.711217
WBGene00045820	21ur-2113	IV	6499007	6499027	1	0.893016	1.09185	0	0	0	0	0.448399	0
WBGene00045821	21ur-3060	IV	16612305	16612325	1	0.897305	0.291051	0	1.46973	8.287	2.01099	4.48399	0.711217
WBGene00045822	21ur-4192	IV	15679047	15679067	1	0.0562153	-0.805503	22.6071	30.8644	19.3363	50.7774	43.9431	36.9833
WBGene00045823	21ur-1895	IV	16092737	16092757	-1	2.56726e-33	3.04276	440.838	273.37	323.193	50.7774	33.1815	41.2506
WBGene00045824	21ur-4351	IV	5155018	5155038	1	1.79551e-21	4.40604	81.9506	73.4866	69.0583	4.52472	3.58719	2.13365
WBGene00045825	21ur-2587	IV	15615471	15615491	-1	0.641729	-0.525666	2.82588	8.81839	5.52467	12.5687	6.27758	7.82339
WBGene00045826	21ur-1680	IV	15239060	15239080	-1	4.70379e-08	-1.41231	73.4729	94.0628	80.1077	244.838	223.303	199.852
WBGene00045827	21ur-1481	IV	16025398	16025418	-1	0.615603	0.73818	8.47764	1.46973	5.52467	3.51923	2.69039	2.13365
WBGene00045828	21ur-5116	IV	4942171	4942191	1	0.10281	-2.32356	2.82588	1.46973	0	8.04395	7.62278	5.68974
WBGene00045829	21ur-2034	IV	13988371	13988391	1	1.64284e-06	1.66424	87.6023	148.443	82.87	26.1428	35.8719	41.2506
WBGene00045830	21ur-4950	IV	15727463	15727483	-1	0.474033	-1.86678	0	0	0	1.50824	2.24199	0.711217
WBGene00045831	21ur-646	IV	16709731	16709751	-1	1	0.139735	0	0	0	0	0.448399	0.711217
WBGene00045832	21ur-1037	IV	15102993	15103013	1	0.893016	1.09185	0	0	0	0	0.448399	0
WBGene00045833	21ur-4327	IV	5775789	5775809	1	2.96542e-25	3.50394	234.548	246.915	320.431	21.6181	14.7972	35.5609
WBGene00045834	21ur-552	IV	15177672	15177692	1	0.866169	-0.10099	6143.47	7085.57	5168.33	5091.31	5796	8848.96
WBGene00045835	21ur-1249	IV	14163249	14163269	-1	0.000256045	-1.12109	53.6917	58.7892	69.0583	127.698	129.139	137.265
WBGene00045836	21ur-678	IV	15142846	15142866	-1	0.2418	2.02543	5.65176	4.40919	0	1.50824	0.896797	0
WBGene00045837	21ur-155	IV	13733362	13733382	-1	0.865144	-1.04659	0	0	0	0.502747	1.3452	0.711217
WBGene00045838	21ur-2719	IV	14491047	14491067	-1	0.370964	0.18693	1037.1	1059.68	806.601	842.1	806.221	908.935
WBGene00045839	21ur-4954	IV	14608420	14608440	1	3.56733e-05	-2.86459	5.65176	4.40919	8.287	44.7444	54.7046	27.0262
WBGene00045840	21ur-2725	IV	15980159	15980179	-1	6.70235e-08	-1.3281	132.816	180.777	143.641	332.818	380.242	450.2
WBGene00045841	21ur-436	IV	14047277	14047297	1	0.015341	-0.692987	84.7764	63.1984	77.3453	125.687	112.1	120.196
WBGene00045842	21ur-1438	IV	14441512	14441532	-1	0.96076	0.218877	0	4.40919	0	1.50824	1.79359	1.42243
WBGene00045843	21ur-4160	IV	15808770	15808790	-1	0.0710752	4.12829	2.82588	4.40919	2.76233	0	0	0.711217
WBGene00045844	21ur-1456	IV	15284598	15284618	-1	0.456173	-2.01614	0	0	0	2.01099	2.24199	0.711217
WBGene00045845	21ur-1701	IV	16888723	16888743	1	0.160004	-2.42372	0	1.46973	0	3.51923	4.48399	4.97852
WBGene00045846	21ur-4985	IV	15918894	15918914	1	0.000879785	0.900747	223.245	239.566	187.839	90.4944	111.651	149.356
WBGene00045847	21ur-4756	IV	5434770	5434790	1	0.702493	-0.677441	0	4.40919	2.76233	6.03296	5.82918	0.711217
WBGene00045848	21ur-2018	IV	16373842	16373862	-1	#N/A	#N/A	0	0	0	0	0	0
WBGene00045849	21ur-5274	IV	15995085	15995105	-1	0.711149	-0.946862	0	0	2.76233	1.00549	2.24199	1.42243
WBGene00045850	21ur-2286	IV	15124189	15124209	1	0.316848	0.305127	124.339	127.867	116.018	106.582	81.1601	112.372
WBGene00045851	21ur-3316	IV	14543422	14543442	-1	0.585977	-1.34901	0	1.46973	0	2.01099	1.3452	2.84487
WBGene00045852	21ur-4338	IV	14830863	14830883	1	0.100643	-0.497375	76.2988	77.8958	58.009	81.9477	101.786	120.196
WBGene00045853	21ur-1220	IV	13901804	13901824	-1	#N/A	#N/A	0	0	0	0	0	0
WBGene00045854	21ur-2975	IV	15481315	15481335	-1	0.000317893	4.05702	5.65176	17.6368	19.3363	0	1.79359	0.711217
WBGene00045855	21ur-4682	IV	5896152	5896172	1	0.0877142	-0.445872	110.209	120.518	88.3947	149.818	136.762	154.334
WBGene00045856	21ur-3638	IV	5620016	5620036	-1	1	0.123774	0	0	0	0	0.448399	0.711217
WBGene00045857	21ur-2386	IV	16259696	16259716	1	0.477061	-1.65325	0	1.46973	0	4.02197	2.69039	0.711217
WBGene00045858	21ur-5146	IV	5750724	5750744	1	0.657883	-1.4048	0	0	0	1.00549	0.896797	1.42243
WBGene00045859	21ur-5253	IV	5587619	5587639	-1	0.961045	0.173689	0	7.34866	0	1.00549	3.58719	3.55609
WBGene00045860	21ur-31	IV	15760144	15760164	1	2.34292e-15	-2.25992	36.7365	52.9103	33.148	232.269	197.744	182.072
WBGene00045861	21ur-1147	IV	15741446	15741466	1	5.25107e-35	2.95506	505.833	571.725	549.704	62.8433	72.1922	75.389
WBGene00045862	21ur-5013	IV	14305056	14305076	-1	5.31089e-10	1.02103	2382.22	2430.94	3439.11	1329.26	1379.72	1353.45
WBGene00045863	21ur-1894	IV	13701043	13701063	-1	2.85282e-05	2.59667	36.7365	14.6973	46.9597	4.52472	4.93238	6.40095
WBGene00045864	21ur-5172	IV	16148752	16148772	-1	1	-0.0159734	11.3035	8.81839	19.3363	17.5961	10.7616	9.95704
WBGene00045865	21ur-768	IV	15494935	15494955	-1	0.605496	-0.861679	0	2.93946	2.76233	2.51373	4.03559	4.97852
WBGene00045866	21ur-3690	IV	14624220	14624240	1	5.6777e-11	2.11039	110.209	132.276	104.969	29.1593	23.7651	28.4487
WBGene00045867	21ur-880	IV	15578259	15578279	-1	0.990233	0.221568	0	1.46973	0	2.01099	0	0
WBGene00045868	21ur-2141	IV	16609214	16609234	-1	4.61837e-06	-1.21638	144.12	185.186	88.3947	336.84	329.125	324.315
WBGene00045869	21ur-178	IV	5835163	5835183	1	0.773028	0.196333	28.2588	27.9249	19.3363	21.6181	25.5587	19.2029
WBGene00045870	21ur-2728	IV	15569324	15569344	-1	0.0174387	-0.679456	180.856	273.37	265.184	314.719	397.281	447.355
WBGene00045871	21ur-4340	IV	14050618	14050638	1	0.581243	-0.521814	16.9553	8.81839	2.76233	8.04395	17.4875	14.9356
WBGene00045872	21ur-906	IV	5869971	5869991	-1	1	0.032894	2.82588	0	11.0493	4.52472	4.93238	2.84487
WBGene00045873	21ur-2345	IV	14280553	14280573	1	1.11401e-29	3.30193	254.329	277.779	193.363	21.1154	24.2135	29.1599
WBGene00045874	21ur-754	IV	15674302	15674322	-1	0.266176	-0.687458	22.6071	16.167	19.3363	36.7005	33.1815	21.3365
WBGene00045875	21ur-58	IV	15168947	15168967	-1	0.00636651	-0.739512	115.861	108.76	74.583	146.299	140.797	218.344
WBGene00045876	21ur-4409	IV	5137121	5137141	1	0.00030567	-2.02955	11.3035	5.87892	11.0493	31.673	33.6299	42.673
WBGene00045877	21ur-2707	IV	6161620	6161640	-1	8.59489e-33	3.43347	138.468	157.261	176.789	13.0714	17.9359	12.0907
WBGene00045878	21ur-4669	IV	15150721	15150741	1	0.527864	-0.477406	11.3035	10.2881	13.8117	20.1099	13.9004	14.2243
WBGene00045879	21ur-4724	IV	15781118	15781138	1	1.76558e-15	1.58638	237.374	238.096	243.085	75.9147	87.8861	74.6778
WBGene00045880	21ur-3842	IV	15588820	15588840	1	0.000606145	-0.936202	62.1694	89.6536	60.7713	147.807	111.651	160.735
WBGene00045881	21ur-3422	IV	16551260	16551280	1	0.858455	-0.39836	5.65176	0	2.76233	3.01648	2.69039	3.55609
WBGene00045882	21ur-4299	IV	6069709	6069729	1	#N/A	#N/A	0	0	0	0	0	0
WBGene00045883	21ur-752	IV	15546991	15547011	1	#N/A	#N/A	0	0	0	0	0	0
WBGene00045884	21ur-250	IV	13929246	13929266	1	0.737108	0.392633	16.9553	2.93946	5.52467	6.03296	5.82918	5.68974
WBGene00045885	21ur-1674	IV	13675869	13675889	1	0.177632	1.05511	16.9553	22.046	5.52467	9.55218	4.48399	8.5346
WBGene00045886	21ur-48	IV	5823697	5823717	-1	0.000724502	-3.43054	2.82588	2.93946	0	28.1538	23.7651	16.358
WBGene00045887	21ur-5194	IV	16149479	16149499	1	7.63765e-15	2.80553	141.294	104.351	140.879	19.1044	19.7295	15.6468
WBGene00045888	21ur-3779	IV	16884670	16884690	1	0.00305818	-0.675271	209.115	192.535	151.928	304.162	271.281	311.513
WBGene00045889	21ur-4711	IV	16608547	16608567	1	2.21928e-118	4.12478	1294.25	1141.98	1196.09	73.9037	64.5694	69.6993
WBGene00045890	21ur-5113	IV	14578763	14578783	1	3.85411e-23	2.87826	161.075	186.656	201.65	20.1099	26.0071	29.1599
WBGene00045891	21ur-4772	IV	14714760	14714780	-1	9.41325e-22	-1.71492	220.419	311.583	367.39	962.76	1016.97	981.479
WBGene00045892	21ur-1005	IV	14749919	14749939	1	0.0362781	-0.844474	56.5176	45.5617	35.9103	108.593	78.9182	59.031
WBGene00045893	21ur-1904	IV	14915534	14915554	1	0.00521736	-2.67116	0	5.87892	2.76233	24.6346	27.8007	12.0907
WBGene00045894	21ur-3545	IV	16906664	16906684	-1	0.0378877	-1.01786	22.6071	11.7578	19.3363	34.6895	39.9075	27.7375
WBGene00045895	21ur-3246	IV	16138905	16138925	-1	3.10294e-06	1.04709	607.565	435.04	383.964	214.673	204.918	270.262
WBGene00045896	21ur-2957	IV	14031169	14031189	-1	1.0819e-60	3.88311	1898.99	1629.93	1439.18	97.0301	100.89	140.11
WBGene00045897	21ur-3781	IV	13760220	13760240	1	0.943987	0.199347	2.82588	10.2881	0	3.51923	6.27758	2.84487
WBGene00045898	21ur-1647	IV	14285016	14285036	-1	1.30951e-19	3.56538	81.9506	98.472	82.87	6.03296	5.82918	11.3795
WBGene00045899	21ur-3253	IV	14942540	14942560	1	0.526795	-1.71165	0	0	0	1.50824	1.79359	0.711217
WBGene00045900	21ur-3297	IV	5420409	5420429	1	0.11636	-0.489528	96.08	67.6076	77.3453	115.632	95.0605	123.041
WBGene00045901	21ur-3291	IV	14949074	14949094	1	0.0136715	-0.763852	70.647	79.3655	85.6323	156.354	130.484	113.084
WBGene00045902	21ur-793	IV	14535261	14535281	-1	5.25284e-05	3.18612	8.47764	23.5157	13.8117	2.01099	1.79359	1.42243
WBGene00045903	21ur-1351	IV	5574738	5574758	1	1	0	0	0	0	0	0	0
WBGene00045904	21ur-4662	IV	14202055	14202075	1	2.49204e-09	2.08076	104.558	67.6076	93.9193	19.1044	23.3167	19.2029
WBGene00045905	21ur-5412	IV	15281087	15281107	-1	0.0107364	3.32769	5.65176	10.2881	5.52467	0.502747	0.448399	1.42243
WBGene00045906	21ur-3674	IV	14672518	14672538	-1	0.229557	0.518737	36.7365	47.0314	41.435	30.6675	30.0427	27.7375
WBGene00045907	21ur-3257	IV	15796808	15796828	1	0.398654	-0.804123	2.82588	4.40919	11.0493	12.0659	9.86477	8.5346
WBGene00045908	21ur-2819	IV	14294285	14294305	1	0.467641	0.61339	14.1294	17.6368	8.287	8.04395	11.6584	7.11217
WBGene00045909	21ur-1395	IV	16892478	16892498	-1	0.558777	-0.260043	39.5623	41.1525	69.0583	61.3351	68.605	44.8067
WBGene00045910	21ur-3768	IV	6023958	6023978	1	0.153166	-0.760395	39.5623	27.9249	13.8117	36.1978	43.9431	58.3198
WBGene00045911	21ur-3032	IV	13751497	13751517	-1	1.01337e-09	1.36587	421.056	354.205	301.094	120.156	138.107	160.024
WBGene00045912	21ur-3577	IV	15913265	15913285	-1	0.0421244	-0.598619	67.8212	51.4406	99.444	109.096	104.028	107.394
WBGene00045913	21ur-1092	IV	13996936	13996956	-1	0.993187	0.331783	0	0	0	0.502747	0.448399	0
WBGene00045914	21ur-3731	IV	14325236	14325256	1	0.397405	0.901641	19.7812	14.6973	5.52467	7.03845	6.72598	7.82339
WBGene00045915	21ur-4477	IV	14288227	14288247	1	0.558798	0.969035	5.65176	2.93946	2.76233	2.51373	2.24199	0.711217
WBGene00045916	21ur-3434	IV	16377610	16377630	1	0.000187723	3.2075	8.47764	11.7578	24.861	2.01099	1.3452	1.42243
WBGene00045917	21ur-1067	IV	13728969	13728989	1	0.989855	0.326931	0	0	0	0.502747	0.448399	0
WBGene00045918	21ur-4420	IV	16544651	16544671	1	2.20667e-19	3.77585	93.2541	135.215	93.9193	12.0659	8.07118	2.84487
WBGene00045919	21ur-1495	IV	16701751	16701771	1	6.10684e-07	1.75206	79.1247	79.3655	93.9193	32.6785	26.0071	14.9356
WBGene00045920	21ur-3670	IV	15759942	15759962	-1	0.38967	-1.59578	0	1.46973	2.76233	2.51373	8.07118	2.13365
WBGene00045921	21ur-5228	IV	14197667	14197687	-1	0.0191113	1.03659	42.3882	39.6827	22.0987	18.6016	13.452	19.9141
WBGene00045922	21ur-4214	IV	14745294	14745314	1	0.893016	-0.261565	2.82588	2.93946	11.0493	7.5412	8.96797	2.13365
WBGene00045923	21ur-3896	IV	14591674	14591694	1	0.00443934	3.63814	8.47764	8.81839	8.287	1.00549	0.896797	0
WBGene00045924	21ur-1345	IV	14472419	14472439	-1	5.48793e-24	2.83841	206.289	239.566	160.215	27.1483	27.3523	31.2935
WBGene00045925	21ur-1172	IV	15217207	15217227	1	0.105808	-0.989069	8.47764	14.6973	8.287	20.6126	19.2811	27.0262
WBGene00045926	21ur-274	IV	16580157	16580177	1	0.442805	-0.464849	31.0847	19.1065	8.287	23.6291	25.1103	32.0048
WBGene00045927	21ur-2239	IV	5590895	5590915	-1	0.707049	0.477236	5.65176	2.93946	13.8117	7.5412	4.93238	2.13365
WBGene00045928	21ur-5209	IV	6134941	6134961	-1	0.107433	-0.932329	8.47764	13.2276	16.574	27.6511	22.4199	23.4702
WBGene00045929	21ur-257	IV	15666938	15666958	1	1.97794e-12	-1.47277	186.508	169.019	245.848	624.411	554.669	471.537
WBGene00045930	21ur-844	IV	14355701	14355721	-1	3.56611e-18	2.34247	231.722	189.595	171.265	26.6456	39.9075	51.2076
WBGene00045931	21ur-4427	IV	13683982	13684002	1	0.914389	0.41387	5.65176	0	0	1.00549	2.69039	0
WBGene00045932	21ur-1418	IV	16206721	16206741	1	0.00116371	-2.47504	0	7.34866	2.76233	23.6291	19.2811	27.0262
WBGene00045933	21ur-1134	IV	13841963	13841983	-1	1.10737e-09	2.32234	129.991	107.29	82.87	30.1648	21.5231	11.3795
WBGene00045934	21ur-500	IV	13698875	13698895	1	2.98941e-05	1.61768	73.4729	49.9709	60.7713	17.0934	18.3843	24.1814
WBGene00045935	21ur-398	IV	5815295	5815315	-1	0.16021	1.79401	2.82588	7.34866	5.52467	1.00549	2.24199	1.42243
WBGene00045936	21ur-5171	IV	13798783	13798803	-1	0.77895	-0.402498	2.82588	8.81839	0	3.51923	7.17438	7.82339
WBGene00045937	21ur-1628	IV	16213789	16213809	1	0.554019	-1.29879	2.82588	0	0	1.00549	2.24199	2.84487
WBGene00045938	21ur-4316	IV	16394278	16394298	1	0.74684	-1.30932	0	0	0	1.00549	1.3452	0.711217
WBGene00045939	21ur-488	IV	14946653	14946673	-1	3.3941e-10	2.37255	70.647	73.4866	46.9597	11.5632	13.0036	12.8019
WBGene00045940	21ur-529	IV	13828314	13828334	1	0.0554219	2.71227	8.47764	5.87892	2.76233	0.502747	1.3452	0.711217
WBGene00045941	21ur-4541	IV	14641217	14641237	-1	0.257145	3.5767	5.65176	1.46973	0	0.502747	0	0
WBGene00045942	21ur-188	IV	16453973	16453993	1	0.323702	3.3412	2.82588	2.93946	0	0.502747	0	0
WBGene00045943	21ur-1799	IV	14123737	14123757	-1	0.0246377	2.9275	5.65176	8.81839	5.52467	2.01099	0	0.711217
WBGene00045944	21ur-2825	IV	16134288	16134308	1	0.268273	3.16696	0	5.87892	2.76233	0.502747	0.448399	0
WBGene00045945	21ur-2812	IV	16140011	16140031	1	0.000135624	2.98017	16.9553	22.046	24.861	4.52472	3.13879	0
WBGene00045946	21ur-894	IV	13751756	13751776	1	1	0	0	0	0	0	0	0
WBGene00045947	21ur-3590	IV	15725560	15725580	-1	1.07429e-16	-2.15885	115.861	76.426	71.8207	444.428	368.135	350.63
WBGene00045948	21ur-4033	IV	16835645	16835665	1	0.122474	-1.13359	172.379	158.731	190.601	378.065	432.705	332.85
WBGene00045949	21ur-1113	IV	14870582	14870602	1	7.19607e-06	-1.14472	96.08	102.881	99.444	256.401	229.132	174.959
WBGene00045950	21ur-3425	IV	16381347	16381367	1	0.00695942	-1.94509	8.47764	5.87892	11.0493	42.2307	35.8719	14.9356
WBGene00045951	21ur-2421	IV	13997032	13997052	-1	1	0	0	0	0	0	0	0
WBGene00045952	21ur-2941	IV	17206616	17206636	1	0.00177005	5.3097	5.65176	4.40919	13.8117	0.502747	0	0
WBGene00045953	21ur-2023	IV	14363443	14363463	-1	0.99501	-0.198885	0	0	2.76233	1.00549	1.79359	0
WBGene00045954	21ur-2048	IV	6505803	6505823	1	0.000298481	2.37333	19.7812	23.5157	24.861	4.02197	3.13879	6.40095
WBGene00045955	21ur-5198	IV	14599144	14599164	1	7.4253e-07	2.71617	33.9106	26.4552	27.6233	5.53021	4.03559	3.55609
WBGene00045956	21ur-5048	IV	16041903	16041923	-1	3.09453e-21	3.84282	90.4282	74.9563	116.018	4.02197	7.17438	8.5346
WBGene00045957	21ur-938	IV	16225244	16225264	1	1.30231e-07	3.5522	33.9106	20.5762	27.6233	3.01648	2.24199	1.42243
WBGene00045958	21ur-4106	IV	5732525	5732545	-1	0.159046	-0.748619	19.7812	17.6368	13.8117	35.695	30.0427	19.9141
WBGene00045959	21ur-4442	IV	16875497	16875517	-1	0.714797	1.13351	2.82588	1.46973	0	0.502747	1.3452	0
WBGene00045960	21ur-4804	IV	5132389	5132409	-1	0.241545	-1.04114	5.65176	4.40919	5.52467	11.0604	10.7616	9.24582
WBGene00045961	21ur-164	IV	13623659	13623679	1	7.79941e-15	3.61771	70.647	48.5011	102.206	6.03296	5.38078	6.40095
WBGene00045962	21ur-4126	IV	16164711	16164731	-1	2.21482e-11	3.48663	48.04	47.0314	38.6727	4.02197	2.69039	5.68974
WBGene00045963	21ur-3197	IV	5519881	5519901	-1	3.63987e-05	-1.65009	25.4329	49.9709	44.1973	127.195	123.758	133.709
WBGene00045964	21ur-2594	IV	14645094	14645114	1	1.06098e-05	-1.11672	243.026	239.566	226.511	433.368	470.819	635.828
WBGene00045965	21ur-4125	IV	15615868	15615888	-1	0.84418	0.120289	93.2541	36.7433	52.4843	55.8049	47.5303	58.3198
WBGene00045966	21ur-1954	IV	16447945	16447965	-1	0.0258688	-0.725542	53.6917	85.2444	85.6323	120.156	108.961	147.933
WBGene00045967	21ur-4061	IV	14473792	14473812	-1	0.00542877	-1.99246	11.3035	4.40919	2.76233	28.1538	20.6263	20.6253
WBGene00045968	21ur-1524	IV	14455854	14455874	1	8.11177e-43	4.72786	209.115	232.218	162.978	7.5412	7.62278	7.82339
WBGene00045969	21ur-1125	IV	15550004	15550024	1	0.453222	1.02239	2.82588	5.87892	5.52467	2.51373	1.3452	3.55609
WBGene00045970	21ur-1664	IV	15678947	15678967	1	0.641729	2.98661	0	1.46973	0	0	0	0
WBGene00045971	21ur-3384	IV	16587756	16587776	-1	1.90213e-26	2.6265	440.838	474.723	651.911	92.5054	85.6441	74.6778
WBGene00045972	21ur-514	IV	17129797	17129817	-1	1.51076e-05	-2.0391	8.47764	14.6973	13.8117	54.2966	56.9466	45.5179
WBGene00045973	21ur-2657	IV	16885810	16885830	-1	1.98256e-27	2.61335	265.633	176.368	226.511	31.1703	36.7687	40.5394
WBGene00045974	21ur-804	IV	17074350	17074370	-1	0.491093	1.33915	2.82588	1.46973	2.76233	1.00549	0.896797	0.711217
WBGene00045975	21ur-2206	IV	14952960	14952980	1	0.0405206	2.74103	0	8.81839	24.861	3.01648	1.79359	0
WBGene00045976	21ur-4551	IV	16676344	16676364	-1	0.375913	1.43483	5.65176	4.40919	2.76233	1.50824	1.79359	1.42243
WBGene00045977	21ur-2859	IV	14560450	14560470	1	0.906214	-0.40498	2.82588	0	2.76233	1.50824	4.93238	0
WBGene00045978	21ur-463	IV	16616792	16616812	1	4.78607e-06	2.28576	28.2588	29.3946	46.9597	8.04395	4.93238	8.5346
WBGene00045979	21ur-544	IV	14145020	14145040	1	1.18099e-05	-1.70381	19.7812	17.6368	22.0987	64.8543	56.9466	68.988
WBGene00045980	21ur-2129	IV	14967125	14967145	1	0.000264014	-0.924514	79.1247	79.3655	58.009	149.818	122.861	143.666
WBGene00045981	21ur-992	IV	15389246	15389266	1	3.85767e-05	-0.873285	129.991	139.624	151.928	280.03	242.135	249.637
WBGene00045982	21ur-1199	IV	15813213	15813233	-1	4.41976e-11	3.11668	50.8659	47.0314	38.6727	6.03296	5.82918	3.55609
WBGene00045983	21ur-3771	IV	5492203	5492223	1	0.0865664	2.32519	2.82588	7.34866	5.52467	1.00549	0.896797	1.42243
WBGene00045984	21ur-4067	IV	16831314	16831334	-1	0.248898	-0.940899	0	11.7578	5.52467	13.5742	12.5552	12.8019
WBGene00045985	21ur-1790	IV	15723786	15723806	1	0.661869	-0.541812	5.65176	7.34866	0	5.53021	7.62278	7.82339
WBGene00045986	21ur-1165	IV	6031844	6031864	-1	2.47485e-06	2.47259	33.9106	38.213	44.1973	10.5577	4.03559	6.40095
WBGene00045987	21ur-1441	IV	16181605	16181625	-1	0.698231	-0.834085	0	1.46973	2.76233	4.02197	2.69039	0.711217
WBGene00045988	21ur-649	IV	14970213	14970233	-1	#N/A	#N/A	0	0	0	0	0	0
WBGene00045989	21ur-584	IV	16087411	16087431	-1	0.726991	0.576143	5.65176	2.93946	2.76233	2.01099	3.13879	2.13365
WBGene00045990	21ur-3373	IV	14565128	14565148	1	0.0379108	2.58502	11.3035	10.2881	2.76233	1.50824	1.79359	0.711217
WBGene00045991	21ur-533	IV	15864244	15864264	-1	0.00521126	-0.544498	183.682	163.14	157.453	267.461	219.267	246.792
WBGene00045992	21ur-2309	IV	5901148	5901168	1	4.06304e-05	-1.03328	418.23	423.283	278.996	602.29	789.182	911.069
WBGene00045993	21ur-1433	IV	13838459	13838479	1	2.06537e-08	-1.26183	87.6023	104.351	138.117	264.947	239.445	284.487
WBGene00045994	21ur-5323	IV	14166907	14166927	-1	2.10433e-06	-1.34141	644.301	912.703	513.794	1314.18	1724.54	2230.38
WBGene00045995	21ur-13	IV	13918820	13918840	-1	0.383223	1.2141	0	4.40919	8.287	1.50824	1.3452	2.84487
WBGene00045996	21ur-2495	IV	16804564	16804584	-1	0.00116025	2.43	14.1294	10.2881	44.1973	6.03296	2.69039	3.55609
WBGene00045997	21ur-3903	IV	14983713	14983733	1	0.46308	-0.799687	0	5.87892	11.0493	10.5577	11.21	7.82339
WBGene00045998	21ur-700	IV	16640675	16640695	1	8.22004e-43	3.46352	211.941	233.687	204.413	17.5961	18.8327	23.4702
WBGene00045999	21ur-4243	IV	15890737	15890757	-1	0.287513	2.20537	5.65176	1.46973	2.76233	1.50824	0.448399	0
WBGene00046000	21ur-4161	IV	5619195	5619215	-1	0.0317264	1.70152	14.1294	17.6368	8.287	3.01648	3.58719	6.40095
WBGene00046001	21ur-2801	IV	15878745	15878765	-1	#N/A	#N/A	0	0	0	0	0	0
WBGene00046002	21ur-3048	IV	4902395	4902415	1	#N/A	#N/A	0	0	0	0	0	0
WBGene00046003	21ur-2997	IV	16627585	16627605	1	0.0482858	-0.76313	42.3882	38.213	49.722	70.3845	82.0569	65.432
WBGene00046004	21ur-1621	IV	16719280	16719300	1	4.50083e-31	3.2749	1370.55	1419.76	1193.33	94.5164	134.968	183.494
WBGene00046005	21ur-3478	IV	16039005	16039025	-1	0.158453	-1.01234	5.65176	5.87892	13.8117	20.6126	11.21	17.0692
WBGene00046006	21ur-2362	IV	16107254	16107274	1	0.28797	2.36587	11.3035	0	2.76233	0.502747	1.3452	0.711217
WBGene00046007	21ur-4055	IV	15209919	15209939	1	0.00249387	-1.10159	45.2141	33.8038	19.3363	83.9587	58.7402	68.988
WBGene00046008	21ur-3360	IV	14362672	14362692	-1	1.26546e-12	-0.983835	545.395	549.679	486.171	1101.52	936.705	1098.12
WBGene00046009	21ur-2849	IV	14164864	14164884	1	9.71495e-07	-2.12634	16.9553	10.2881	19.3363	61.8378	66.8114	62.5871
WBGene00046010	21ur-2648	IV	15749455	15749475	1	0.188968	-0.721661	11.3035	22.046	52.4843	50.2747	56.4982	31.2935
WBGene00046011	21ur-5342	IV	14624634	14624654	1	0.0126427	0.689005	101.732	139.624	99.444	65.3571	79.3666	70.4105
WBGene00046012	21ur-2424	IV	14639380	14639400	-1	4.04164e-120	4.30363	1006.01	1131.69	1312.11	57.3131	61.4306	55.4749
WBGene00046013	21ur-5021	IV	15144586	15144606	-1	0.0431262	0.495662	132.816	194.005	187.839	138.758	118.377	110.95
WBGene00046014	21ur-2448	IV	5176268	5176288	-1	1	0	0	0	0	0	0	0
WBGene00046015	21ur-963	IV	15896622	15896642	1	5.37644e-08	3.53101	11.3035	54.3801	35.9103	2.51373	3.13879	3.55609
WBGene00046016	21ur-2994	IV	15406156	15406176	1	0.257827	-0.456204	39.5623	49.9709	69.0583	71.8928	70.847	73.9666
WBGene00046017	21ur-50	IV	14877377	14877397	-1	0.198183	-1.53865	5.65176	4.40919	0	4.52472	12.5552	13.5131
WBGene00046018	21ur-4221	IV	16625142	16625162	-1	0.222909	-1.91674	0	2.93946	0	2.51373	7.17438	5.68974
WBGene00046019	21ur-1857	IV	15179302	15179322	-1	0.655623	1.69104	0	2.93946	0	0	0.448399	0.711217
WBGene00046020	21ur-3185	IV	15562010	15562030	-1	0.00396934	2.42707	11.3035	13.2276	13.8117	2.51373	1.3452	3.55609
WBGene00046021	21ur-76	IV	14971569	14971589	1	5.49834e-05	-0.919148	517.136	543.801	428.162	910.474	773.936	1140.08
WBGene00046022	21ur-2945	IV	15920579	15920599	1	1	0	0	0	0	0	0	0
WBGene00046023	21ur-292	IV	15421159	15421179	1	0.0941749	-1.00186	14.1294	14.6973	22.0987	37.2032	37.2171	25.6038
WBGene00046024	21ur-2625	IV	15396919	15396939	-1	0.386006	2.1932	2.82588	4.40919	0	1.00549	0	0.711217
WBGene00046025	21ur-5231	IV	14268472	14268492	-1	0.000496545	-3.04876	0	2.93946	5.52467	23.1263	23.7651	24.1814
WBGene00046026	21ur-2556	IV	14366794	14366814	1	1.67844e-21	3.69811	76.2988	102.881	107.731	7.03845	8.51957	6.40095
WBGene00046027	21ur-2007	IV	14878244	14878264	1	0.256521	-0.968884	2.82588	7.34866	11.0493	17.5961	12.1068	12.0907
WBGene00046028	21ur-1881	IV	16479682	16479702	1	0.236023	1.62908	2.82588	5.87892	5.52467	1.00549	2.24199	1.42243
WBGene00046029	21ur-505	IV	16042244	16042264	-1	9.24095e-12	-1.86624	56.5176	88.1839	58.009	289.582	238.996	233.99
WBGene00046030	21ur-3209	IV	6176712	6176732	-1	#N/A	#N/A	0	0	0	0	0	0
WBGene00046031	21ur-1747	IV	14749614	14749634	-1	7.54668e-05	-1.40256	31.0847	17.6368	38.6727	68.3735	75.331	73.2554
WBGene00046032	21ur-4085	IV	14999879	14999899	1	8.59842e-08	-1.33474	90.4282	120.518	116.018	278.019	255.139	300.134
WBGene00046033	21ur-4741	IV	16574038	16574058	1	#N/A	#N/A	0	0	0	0	0	0
WBGene00046034	21ur-4381	IV	17186777	17186797	-1	0.399124	2.21573	5.65176	1.46973	0	0.502747	0.896797	0
WBGene00046035	21ur-3101	IV	5902664	5902684	1	0.550763	-0.528051	5.65176	7.34866	8.287	9.04944	11.21	10.6683
WBGene00046036	21ur-4419	IV	5197143	5197163	1	0.631446	2.03032	0	1.46973	0	0.502747	0	0
WBGene00046037	21ur-1690	IV	14602638	14602658	1	0.352881	-0.475793	64.9953	24.9854	16.574	51.2801	47.0819	44.8067
WBGene00046038	21ur-729	IV	14345619	14345639	-1	0.241955	-1.08989	11.3035	1.46973	5.52467	12.0659	13.9004	7.82339
WBGene00046039	21ur-1340	IV	17185756	17185776	-1	0.0153507	5.63765	2.82588	1.46973	11.0493	0	0	0
WBGene00046040	21ur-1659	IV	14301372	14301392	1	1.32155e-06	-1.35534	79.1247	58.7892	63.5337	205.623	162.769	138.687
WBGene00046041	21ur-2213	IV	15216501	15216521	-1	0.895698	0.375539	2.82588	0	2.76233	2.01099	0.896797	0.711217
WBGene00046042	21ur-2163	IV	14274093	14274113	1	1.83349e-07	-2.00967	28.2588	17.6368	13.8117	81.9477	79.815	73.2554
WBGene00046043	21ur-2794	IV	15897358	15897378	-1	5.27086e-05	-1.97303	11.3035	17.6368	11.0493	56.3076	64.5694	43.3842
WBGene00046044	21ur-3565	IV	15832687	15832707	-1	0.491064	0.687556	8.47764	7.34866	13.8117	5.53021	5.38078	7.11217
WBGene00046045	21ur-3761	IV	16687491	16687511	1	2.02919e-09	1.43018	955.148	728.987	582.852	237.799	262.762	341.384
WBGene00046046	21ur-1920	IV	15482966	15482986	1	6.37533e-21	1.59987	322.15	405.646	414.35	135.239	120.619	122.329
WBGene00046047	21ur-2923	IV	14751839	14751859	1	0.0295018	-1.0149	22.6071	16.167	41.435	52.2856	57.8434	44.0955
WBGene00046048	21ur-869	IV	13722850	13722870	-1	0.128043	-2.68994	0	0	0	2.51373	2.69039	2.84487
WBGene00046049	21ur-5303	IV	16033325	16033345	1	0.000665094	-0.718057	322.15	217.52	198.888	382.087	366.79	458.024
WBGene00046050	21ur-1865	IV	5584089	5584109	1	0.0132987	-2.29081	2.82588	4.40919	2.76233	16.5906	23.3167	11.3795
WBGene00046051	21ur-631	IV	13726217	13726237	-1	0.637697	-0.159886	96.08	98.472	99.444	112.615	108.512	107.394
WBGene00046052	21ur-825	IV	15724658	15724678	1	0.289597	-2.51161	0	0	0	0	3.58719	3.55609
WBGene00046053	21ur-3599	IV	16357771	16357791	-1	0.170881	-1.75406	2.82588	1.46973	2.76233	8.54669	7.17438	6.40095
WBGene00046054	21ur-5208	IV	14751836	14751856	1	0.0295018	-1.0149	22.6071	16.167	41.435	52.2856	57.8434	44.0955
WBGene00046055	21ur-1934	IV	14555659	14555679	-1	4.03997e-08	-1.11011	129.991	98.472	113.256	261.428	237.651	225.456
WBGene00046056	21ur-3544	IV	15624379	15624399	1	0.776094	1.06467	0	1.46973	0	0.502747	0	0.711217
WBGene00046057	21ur-1696	IV	15989519	15989539	1	2.77071e-07	-1.62877	33.9106	23.5157	44.1973	95.5218	109.409	93.8806
WBGene00046058	21ur-1274	IV	5425097	5425117	1	0.500125	-0.561865	19.7812	2.93946	24.861	19.6071	23.3167	21.3365
WBGene00046059	21ur-1837	IV	15986317	15986337	-1	8.74421e-06	-1.42509	93.2541	67.6076	52.4843	184.005	216.128	169.27
WBGene00046060	21ur-2661	IV	14966689	14966709	1	0.378759	-1.44249	2.82588	0	2.76233	4.52472	3.58719	4.2673
WBGene00046061	21ur-919	IV	6042100	6042120	-1	0.871585	1.3188	0	1.46973	0	0	0.896797	0
WBGene00046062	21ur-3336	IV	15102451	15102471	-1	1.00567e-14	-1.51106	226.071	324.811	207.175	692.282	684.256	822.878
WBGene00046063	21ur-3570	IV	15978663	15978683	-1	0.000231613	-0.895794	254.329	233.687	174.027	425.826	346.612	463.713
WBGene00046064	21ur-5051	IV	6494022	6494042	1	#N/A	#N/A	0	0	0	0	0	0
WBGene00046065	21ur-1383	IV	17261548	17261568	-1	4.53571e-15	3.37243	73.4729	70.5471	143.641	9.55218	9.86477	7.82339
WBGene00046066	21ur-391	IV	14284599	14284619	1	4.57477e-05	-0.922458	486.052	486.481	439.211	843.609	742.548	1093.85
WBGene00046067	21ur-4480	IV	16544405	16544425	1	0.169213	-1.37566	5.65176	5.87892	0	11.5632	12.1068	8.5346
WBGene00046068	21ur-1845	IV	15727512	15727532	1	0.913733	0.0732975	28.2588	51.4406	27.6233	37.706	39.4591	29.8711
WBGene00046069	21ur-3010	IV	15262354	15262374	-1	0.00102556	-2.03304	14.1294	1.46973	11.0493	28.1538	31.3879	33.4272
WBGene00046070	21ur-3871	IV	13761158	13761178	1	0.423501	-0.568243	25.4329	14.6973	5.52467	24.6346	25.1103	17.0692
WBGene00046071	21ur-2883	IV	16248785	16248805	-1	0.0132734	-0.9374	42.3882	79.3655	63.5337	103.566	123.758	135.842
WBGene00046072	21ur-727	IV	14038024	14038044	1	0.507122	-1.79991	0	0	0	1.50824	2.69039	0
WBGene00046073	21ur-1591	IV	13719446	13719466	1	5.48712e-05	-1.626	31.0847	39.6827	27.6233	119.151	110.306	80.3675
WBGene00046074	21ur-1918	IV	14554517	14554537	-1	0.749161	1.11528	0	1.46973	0	0	0.448399	0.711217
WBGene00046075	21ur-4616	IV	6481968	6481988	1	0.208653	0.584967	36.7365	27.9249	33.148	23.1263	16.5907	24.8926
WBGene00046076	21ur-5404	IV	16623031	16623051	1	4.85455e-62	3.97956	313.673	367.433	298.332	18.0989	22.4199	22.0477
WBGene00046077	21ur-5213	IV	6178898	6178918	-1	0.974826	0.0227418	627.346	487.951	378.44	461.019	476.648	531.99
WBGene00046078	21ur-299	IV	5775507	5775527	1	0.250321	2.11282	5.65176	1.46973	2.76233	1.00549	0.448399	0.711217
WBGene00046079	21ur-1001	IV	14830288	14830308	1	2.2355e-82	4.11868	607.565	574.665	767.929	36.7005	43.4947	30.5823
WBGene00046080	21ur-1426	IV	14156786	14156806	-1	0.00994787	-3.38221	0	2.93946	0	16.0879	8.96797	18.4916
WBGene00046081	21ur-4624	IV	15286231	15286251	-1	0.70093	-0.249799	36.7365	19.1065	13.8117	34.6895	24.2135	21.3365
WBGene00046082	21ur-912	IV	15063352	15063372	-1	0.891224	1.09188	0	0	0	0	0.448399	0
WBGene00046083	21ur-2734	IV	14435857	14435877	1	0.558295	1.35624	0	1.46973	5.52467	1.00549	0.896797	0.711217
WBGene00046084	21ur-1042	IV	5830666	5830686	-1	0.396579	2.5932	0	2.93946	2.76233	0	0.896797	0
WBGene00046085	21ur-23	IV	16206597	16206617	-1	0.0468259	4.57381	0	10.2881	2.76233	0	0	0.711217
WBGene00046086	21ur-325	IV	5213902	5213922	1	#N/A	#N/A	0	0	0	0	0	0
WBGene00046087	21ur-734	IV	16678764	16678784	1	0.00599444	3.8889	8.47764	4.40919	11.0493	1.00549	0.448399	0
WBGene00046088	21ur-409	IV	15697656	15697676	1	0.0255547	-1.15164	22.6071	8.81839	16.574	31.673	34.0783	33.4272
WBGene00046089	21ur-2171	IV	15206003	15206023	-1	0.294484	-1.66796	2.82588	1.46973	0	3.01648	6.27758	4.2673
WBGene00046090	21ur-5053	IV	15247743	15247763	1	0.0141872	-1.84144	5.65176	4.40919	5.52467	16.5906	21.0747	16.358
WBGene00046091	21ur-1566	IV	15253964	15253984	1	0.641729	0.143501	435.186	358.614	292.807	289.582	300.427	394.725
WBGene00046092	21ur-41	IV	17038557	17038577	1	0.764817	0.959857	0	1.46973	2.76233	1.50824	0	0.711217
WBGene00046093	21ur-2297	IV	15307844	15307864	-1	7.87976e-12	3.26365	70.647	136.685	132.592	9.04944	12.5552	14.2243
WBGene00046094	21ur-265	IV	5787504	5787524	1	0.249593	-0.583338	53.6917	23.5157	8.287	40.2197	36.3203	49.074
WBGene00046095	21ur-2391	IV	16059521	16059541	1	1.47769e-15	-1.28645	161.075	185.186	193.363	459.51	427.772	433.842
WBGene00046096	21ur-1686	IV	14932050	14932070	1	0.00227904	-1.88787	2.82588	8.81839	13.8117	42.7335	29.1459	22.7589
WBGene00046097	21ur-971	IV	5506448	5506468	1	0.72819	1.65224	0	2.93946	0	0	0.448399	0.711217
WBGene00046098	21ur-4091	IV	13679205	13679225	-1	0.913261	-0.0969799	19.7812	13.2276	30.3857	21.1154	21.9715	21.3365
WBGene00046099	21ur-2017	IV	13765183	13765203	1	0.025475	3.06706	5.65176	2.93946	13.8117	1.50824	0.896797	0
WBGene00046100	21ur-2779	IV	13863695	13863715	1	4.30983e-05	-2.14489	8.47764	13.2276	8.287	41.2252	52.4626	46.2291
WBGene00046101	21ur-146	IV	14584885	14584905	1	0.00292069	1.88001	19.7812	14.6973	24.861	6.03296	5.82918	3.55609
WBGene00046102	21ur-4653	IV	16108380	16108400	1	0.893016	1.09186	0	0	0	0	0.448399	0
WBGene00046103	21ur-3464	IV	16471543	16471563	1	0.0101984	3.03174	8.47764	4.40919	24.861	0	1.79359	2.84487
WBGene00046104	21ur-4454	IV	5769501	5769521	1	0.349411	-2.3208	0	0	0	2.51373	2.24199	1.42243
WBGene00046105	21ur-191	IV	15699348	15699368	1	0.0157197	-1.36053	8.47764	10.2881	16.574	39.2142	26.0071	23.4702
WBGene00046106	21ur-480	IV	16806009	16806029	-1	1.67497e-19	2.99013	115.861	116.109	77.3453	14.5797	10.7616	14.2243
WBGene00046107	21ur-400	IV	14460683	14460703	-1	0.66732	-0.212631	36.7365	45.5617	46.9597	39.717	53.3594	58.3198
WBGene00046108	21ur-4846	IV	14090917	14090937	-1	2.72183e-18	3.19972	146.946	132.276	243.085	26.1428	15.694	14.2243
WBGene00046109	21ur-2935	IV	5974848	5974868	-1	1.05867e-07	-1.33296	96.08	94.0628	151.928	301.145	304.911	242.525
WBGene00046110	21ur-1289	IV	15678948	15678968	1	0.641729	2.98661	0	1.46973	0	0	0	0
WBGene00046111	21ur-4116	IV	15426410	15426430	-1	0.893016	0.332719	2.82588	5.87892	0	1.00549	4.48399	2.13365
WBGene00046112	21ur-2751	IV	5907385	5907405	1	0.775691	-0.193964	14.1294	23.5157	41.435	21.1154	36.3203	32.0048
WBGene00046113	21ur-1190	IV	14405962	14405982	-1	8.96295e-05	0.884756	234.548	274.84	273.471	133.228	136.313	156.468
WBGene00046114	21ur-2298	IV	14224784	14224804	-1	6.6919e-15	2.22815	211.941	189.595	149.166	48.7664	33.1815	35.5609
WBGene00046115	21ur-2939	IV	15547845	15547865	1	0.0281343	-1.98335	2.82588	2.93946	5.52467	8.04395	17.9359	17.0692
WBGene00046116	21ur-2746	IV	16567650	16567670	-1	0.00966511	1.9343	8.47764	30.8644	35.9103	5.53021	9.86477	4.2673
WBGene00046117	21ur-2479	IV	14401109	14401129	1	0.000254361	-1.25768	67.8212	74.9563	52.4843	122.67	147.523	203.408
WBGene00046118	21ur-3327	IV	16088869	16088889	-1	0.00479957	-1.20628	22.6071	73.4866	33.148	130.211	84.7473	100.282
WBGene00046119	21ur-2409	IV	14718182	14718202	-1	3.45365e-05	1.43986	113.035	105.821	71.8207	24.1318	32.2847	52.6301
WBGene00046120	21ur-3797	IV	15939725	15939745	1	0.988678	0.230717	2.82588	0	0	0.502747	0.896797	0.711217
WBGene00046121	21ur-3554	IV	16146294	16146314	1	1.1004e-73	4.46926	398.449	476.193	530.368	19.1044	24.6619	19.2029
WBGene00046122	21ur-4738	IV	15207231	15207251	1	0.303762	2.01312	2.82588	2.93946	2.76233	0.502747	0.896797	0.711217
WBGene00046123	21ur-4521	IV	14047698	14047718	1	0.319422	0.984743	8.47764	13.2276	11.0493	10.0549	3.13879	3.55609
WBGene00046124	21ur-2672	IV	16551072	16551092	1	1.04845e-13	-2.11492	25.4329	51.4406	35.9103	159.371	167.253	190.606
WBGene00046125	21ur-1236	IV	16543188	16543208	1	0.917897	-0.24866	0	2.93946	5.52467	6.53571	2.69039	0.711217
WBGene00046126	21ur-2837	IV	16537820	16537840	-1	0.0972378	-1.8936	2.82588	4.40919	0	14.5797	9.41637	6.40095
WBGene00046127	21ur-3884	IV	15073346	15073366	-1	0.010199	-4.1198	0	0	0	7.5412	8.96797	4.97852
WBGene00046128	21ur-305	IV	14924270	14924290	1	1	0.0708187	0	0	0	0.502747	0	0.711217
WBGene00046129	21ur-4457	IV	14803672	14803692	-1	0.000104844	4.83739	5.65176	24.9854	13.8117	0.502747	0.448399	0.711217
WBGene00046130	21ur-3376	IV	15629866	15629886	-1	0.654063	0.381305	8.47764	10.2881	33.148	14.0769	10.7616	13.5131
WBGene00046131	21ur-2193	IV	13873398	13873418	-1	1.02701e-05	-1.67101	39.5623	16.167	27.6233	85.4669	89.2313	73.9666
WBGene00046132	21ur-4375	IV	14126024	14126044	-1	6.8609e-14	-1.24895	714.948	833.338	883.947	1702.3	2094.47	1989.27
WBGene00046133	21ur-2638	IV	13956565	13956585	-1	2.06591e-09	-1.55738	141.294	94.0628	85.6323	307.178	317.915	309.379
WBGene00046134	21ur-3999	IV	14899529	14899549	-1	0.00811392	-1.87877	5.65176	2.93946	11.0493	26.6456	17.9359	20.6253
WBGene00046135	21ur-1264	IV	16547563	16547583	1	9.24986e-05	-1.36672	39.5623	117.578	129.83	277.516	284.733	187.05
WBGene00046136	21ur-888	IV	16817129	16817149	1	0.273934	-0.291857	418.23	355.675	248.61	379.071	356.477	519.9
WBGene00046137	21ur-1033	IV	15660597	15660617	1	0.641729	2.9867	0	1.46973	0	0	0	0
WBGene00046138	21ur-2220	IV	13830698	13830718	1	0.0348749	-0.370347	1752.05	1743.1	2267.88	2410.17	2658.11	2371.91
WBGene00046139	21ur-86	IV	5787751	5787771	-1	0.364476	4.19014	5.65176	0	0	0	0	0
WBGene00046140	21ur-3206	IV	13964184	13964204	-1	1	0	0	0	0	0	0	0
WBGene00046141	21ur-487	IV	14170702	14170722	-1	0.791857	0.566685	0	5.87892	8.287	3.51923	4.03559	2.13365
WBGene00046142	21ur-983	IV	16396588	16396608	1	3.2361e-12	3.62525	64.9953	149.913	118.78	9.55218	3.58719	14.9356
WBGene00046143	21ur-4973	IV	5974965	5974985	-1	#N/A	#N/A	0	0	0	0	0	0
WBGene00046144	21ur-3756	IV	15841816	15841836	-1	2.00239e-05	-1.3696	70.647	55.8498	110.493	188.53	215.231	194.873
WBGene00046145	21ur-3658	IV	17173943	17173963	1	0.337134	-2.1406	0	0	0	1.50824	3.13879	0.711217
WBGene00046146	21ur-3158	IV	15997223	15997243	-1	6.52791e-08	-1.49478	421.056	462.965	259.659	908.463	921.459	1409.63
WBGene00046147	21ur-3223	IV	16353004	16353024	1	4.61563e-11	1.62263	149.772	121.988	146.404	38.7115	42.1495	54.7637
WBGene00046148	21ur-2402	IV	5807934	5807954	-1	0.898781	-0.361484	5.65176	0	0	1.50824	3.13879	1.42243
WBGene00046149	21ur-225	IV	14981339	14981359	1	0.000889716	0.558332	398.449	392.418	516.556	312.206	272.626	298.711
WBGene00046150	21ur-4885	IV	14096118	14096138	1	0.0116575	3.92264	2.82588	2.93946	19.3363	0	0.896797	0.711217
WBGene00046151	21ur-2319	IV	15947649	15947669	1	0.893016	1.09186	0	0	0	0.502747	0	0
WBGene00046152	21ur-4143	IV	14973613	14973633	-1	0.311406	-2.23927	0	0	0	1.50824	2.24199	2.13365
WBGene00046153	21ur-4749	IV	14945727	14945747	-1	5.26545e-06	1.79205	53.6917	60.259	33.148	17.0934	12.1068	14.2243
WBGene00046154	21ur-4599	IV	15436626	15436646	-1	0.000164109	1.12388	3153.68	3658.16	2795.48	1062.81	1294.08	2054.71
WBGene00046155	21ur-5377	IV	14972383	14972403	-1	3.73844e-06	-1.05549	206.289	136.685	116.018	294.609	290.562	361.298
WBGene00046156	21ur-1546	IV	16452202	16452222	1	1	0	0	0	0	0	0	0
WBGene00046157	21ur-2076	IV	5797784	5797804	1	0.583655	0.292017	45.2141	45.5617	46.9597	30.1648	45.7367	36.2721
WBGene00046158	21ur-1153	IV	16359636	16359656	1	0.831399	1.09188	0	0	0	0	0.448399	0
WBGene00046159	21ur-5181	IV	15243053	15243073	-1	0.74929	-1.33113	0	0	0	1.50824	0.896797	0.711217
WBGene00046160	21ur-1718	IV	15751727	15751747	1	1.70269e-16	2.55694	209.115	364.493	212.7	32.1758	49.3238	54.0525
WBGene00046161	21ur-816	IV	5914403	5914423	1	0.00622232	2.30145	11.3035	11.7578	11.0493	3.01648	1.79359	2.13365
WBGene00046162	21ur-1402	IV	15699453	15699473	1	0.0501645	-1.12236	8.47764	26.4552	11.0493	29.662	43.0463	36.2721
WBGene00046163	21ur-361	IV	15275397	15275417	1	0.786215	-0.27541	11.3035	11.7578	24.861	22.6236	26.0071	7.11217
WBGene00046164	21ur-5001	IV	15148572	15148592	-1	1.80362e-24	3.12906	107.383	111.7	162.978	15.0824	13.452	14.9356
WBGene00046165	21ur-410	IV	16618040	16618060	1	0.835053	0.619568	2.82588	0	2.76233	1.00549	1.3452	0.711217
WBGene00046166	21ur-2455	IV	16545177	16545197	1	1.69514e-06	-1.20237	183.682	220.46	116.018	363.486	399.972	452.334
WBGene00046167	21ur-2338	IV	16640905	16640925	1	1	-0.029805	0	1.46973	5.52467	4.02197	1.3452	1.42243
WBGene00046168	21ur-2603	IV	14693529	14693549	-1	0.45792	-1.05762	8.47764	2.93946	0	9.04944	10.7616	2.84487
WBGene00046169	21ur-4763	IV	15310569	15310589	1	0.307212	-1.01788	5.65176	4.40919	2.76233	9.04944	10.3132	6.40095
WBGene00046170	21ur-1512	IV	6187712	6187732	1	0.554987	-0.413073	25.4329	10.2881	19.3363	26.6456	25.5587	16.358
WBGene00046171	21ur-51	IV	16835240	16835260	-1	0.72819	-0.210331	42.3882	33.8038	19.3363	34.1868	35.4235	41.9618
WBGene00046172	21ur-1279	IV	16887952	16887972	-1	0.0120977	-3.84649	0	0	0	8.04395	6.72598	2.84487
WBGene00046173	21ur-3233	IV	15869032	15869052	1	0.212385	-1.37115	0	10.2881	0	12.5687	14.7972	6.40095
WBGene00046174	21ur-653	IV	14051949	14051969	-1	0.624328	-1.40077	0	0	0	1.00549	0.896797	1.42243
WBGene00046175	21ur-745	IV	14051794	14051814	1	0.909981	0.258766	8.47764	1.46973	2.76233	4.02197	3.58719	2.13365
WBGene00046176	21ur-3971	IV	14470642	14470662	1	9.14053e-43	3.68399	322.15	352.735	325.955	22.6236	24.2135	32.0048
WBGene00046177	21ur-2344	IV	17074903	17074923	1	0.872442	1.09188	0	0	0	0	0.448399	0
WBGene00046178	21ur-1872	IV	14525197	14525217	-1	0.466089	-2.23226	0	0	0	3.51923	0.896797	1.42243
WBGene00046179	21ur-663	IV	15330774	15330794	1	4.7189e-16	4.22223	56.5176	55.8498	55.2467	3.01648	3.58719	2.13365
WBGene00046180	21ur-498	IV	15867721	15867741	-1	0.328437	2.36745	2.82588	4.40919	0	0.502747	0.896797	0
WBGene00046181	21ur-1650	IV	16700757	16700777	1	0.46731	-2.25029	0	0	0	2.01099	3.13879	0.711217
WBGene00046182	21ur-3294	IV	14812662	14812682	1	0.0762894	-3.07387	2.82588	0	0	10.5577	8.96797	0.711217
WBGene00046183	21ur-4540	IV	14811017	14811037	1	0.367464	-1.74909	0	1.46973	2.76233	6.03296	6.72598	1.42243
WBGene00046184	21ur-491	IV	14380555	14380575	-1	0.899589	0.701286	0	0	2.76233	1.50824	0	0
WBGene00046185	21ur-546	IV	15429297	15429317	1	0.641729	2.98662	0	1.46973	0	0	0	0
WBGene00046186	21ur-1420	IV	14306167	14306187	-1	7.4945e-05	-0.978426	84.7764	86.7141	85.6323	192.552	161.872	152.2
WBGene00046187	21ur-4	IV	13730709	13730729	-1	0.766337	-0.741965	5.65176	0	0	4.02197	3.13879	0.711217
WBGene00046188	21ur-2647	IV	17226436	17226456	-1	0.0116474	2.73814	11.3035	20.5762	5.52467	1.00549	0.896797	4.2673
WBGene00046189	21ur-2354	IV	6054944	6054964	1	3.76233e-06	-1.59691	39.5623	44.0919	24.861	113.621	100.89	123.041
WBGene00046190	21ur-3976	IV	15777728	15777748	1	0.328511	-0.845947	8.47764	7.34866	5.52467	13.0714	18.3843	6.40095
WBGene00046191	21ur-3788	IV	13992301	13992321	-1	0.0384909	-0.724553	194.986	465.905	243.085	403.705	533.146	574.663
WBGene00046192	21ur-3682	IV	5890035	5890055	-1	0.76847	2.0253	0	1.46973	0	0	0.448399	0
WBGene00046193	21ur-3287	IV	16251565	16251585	1	1.04693e-74	4.98829	1989.42	2076.73	2801.01	69.379	65.0178	82.5012
WBGene00046194	21ur-2435	IV	15724101	15724121	-1	8.185e-10	1.46889	172.379	199.883	157.453	51.2801	62.7758	80.3675
WBGene00046195	21ur-3526	IV	15721508	15721528	-1	0.000571117	2.32871	33.9106	13.2276	27.6233	8.04395	2.69039	3.55609
WBGene00046196	21ur-1266	IV	13725890	13725910	-1	0.841317	1.09188	0	0	0	0	0.448399	0
WBGene00046197	21ur-1841	IV	5442930	5442950	-1	0.318754	1.79496	5.65176	1.46973	2.76233	1.50824	0.448399	0.711217
WBGene00046198	21ur-1812	IV	17180868	17180888	-1	0.286354	-2.22454	0	0	0	3.01648	1.3452	1.42243
WBGene00046199	21ur-3654	IV	17049123	17049143	-1	5.22087e-09	3.72233	33.9106	30.8644	60.7713	3.01648	1.79359	4.97852
WBGene00046200	21ur-2225	IV	16367944	16367964	-1	9.24598e-07	3.82268	28.2588	20.5762	52.4843	4.52472	0.448399	2.13365
WBGene00046201	21ur-5313	IV	14347724	14347744	-1	0.480688	-1.50867	2.82588	0	0	3.01648	1.79359	2.13365
WBGene00046202	21ur-4236	IV	14564008	14564028	-1	0.22997	-2.2161	2.82588	0	0	5.02747	4.03559	2.13365
WBGene00046203	21ur-1177	IV	15495046	15495066	-1	3.12974e-06	3.09646	31.0847	29.3946	11.0493	2.51373	3.13879	2.84487
WBGene00046204	21ur-1120	IV	16208486	16208506	1	0.0128322	-0.973499	36.7365	27.9249	24.861	72.3955	48.8754	52.6301
WBGene00046205	21ur-5165	IV	17032902	17032922	-1	3.29387e-36	3.43658	245.852	173.428	185.076	15.0824	21.0747	19.2029
WBGene00046206	21ur-2890	IV	15883990	15884010	1	0.000824516	4.83552	8.47764	10.2881	11.0493	0.502747	0.448399	0
WBGene00046207	21ur-3238	IV	14995803	14995823	-1	6.03685e-18	3.35583	115.861	102.881	82.87	7.5412	10.7616	11.3795
WBGene00046208	21ur-1304	IV	14711385	14711405	-1	2.16626e-08	-2.10705	28.2588	39.6827	8.287	137.753	111.651	103.126
WBGene00046209	21ur-333	IV	14269555	14269575	1	3.0288e-06	-1.07613	96.08	119.048	107.731	251.876	212.989	223.322
WBGene00046210	21ur-5266	IV	13940535	13940555	1	0.893016	1.09185	0	0	0	0	0.448399	0
WBGene00046211	21ur-3035	IV	16986551	16986571	1	1.65537e-06	3.83436	11.3035	22.046	52.4843	1.00549	2.24199	2.84487
WBGene00046212	21ur-2987	IV	6080137	6080157	1	0.335385	2.18472	2.82588	1.46973	5.52467	0	1.3452	0.711217
WBGene00046213	21ur-4622	IV	5105257	5105277	-1	0.406072	-0.259068	76.2988	114.639	129.83	133.228	126.897	126.597
WBGene00046214	21ur-3184	IV	17027431	17027451	-1	5.83691e-07	-0.944085	305.195	295.416	198.888	450.461	532.698	566.129
WBGene00046215	21ur-377	IV	14682817	14682837	1	0.179941	-2.35605	0	0	2.76233	5.02747	4.48399	2.84487
WBGene00046216	21ur-3528	IV	14103645	14103665	-1	3.06966e-06	3.34109	28.2588	11.7578	46.9597	2.51373	4.03559	1.42243
WBGene00046217	21ur-3408	IV	16980062	16980082	1	0.999479	-0.20331	0	0	0	0.502747	0.896797	0
WBGene00046218	21ur-2688	IV	15387098	15387118	1	1.91044e-30	1.94474	827.983	845.095	908.808	204.618	201.331	266.706
WBGene00046219	21ur-38	IV	16789030	16789050	1	0.000588877	-0.888811	73.4729	72.0168	58.009	134.736	111.203	134.42
WBGene00046220	21ur-3131	IV	5770496	5770516	-1	0.055518	-1.49801	11.3035	7.34866	5.52467	25.1373	25.5587	16.358
WBGene00046221	21ur-3061	IV	15755887	15755907	1	0.235436	-1.21766	5.65176	0	11.0493	13.5742	13.452	5.68974
WBGene00046222	21ur-5453	IV	14910568	14910588	-1	0.00982081	-0.923329	33.9106	29.3946	44.1973	56.3076	64.5694	78.9451
WBGene00046223	21ur-5217	IV	15763871	15763891	-1	4.57822e-17	5.19775	127.165	188.126	52.4843	3.01648	5.82918	0.711217
WBGene00046224	21ur-4164	IV	15210872	15210892	-1	0.566127	-0.310313	11.3035	33.8038	46.9597	40.2197	43.0463	32.0048
WBGene00046225	21ur-2035	IV	13960652	13960672	-1	0.00156509	-2.27227	2.82588	10.2881	2.76233	37.2032	34.5267	16.358
WBGene00046226	21ur-3271	IV	16118282	16118302	-1	0.0668244	-2.12327	2.82588	1.46973	2.76233	8.54669	9.41637	10.6683
WBGene00046227	21ur-1936	IV	13957711	13957731	-1	0.00146399	4.40314	2.82588	14.6973	13.8117	0	1.3452	0
WBGene00046228	21ur-692	IV	15973139	15973159	1	0.00372013	-1.29332	11.3035	14.6973	33.148	52.7884	40.8043	46.2291
WBGene00046229	21ur-4699	IV	15161495	15161515	1	1.49743e-29	2.5472	265.633	299.825	312.144	46.2527	52.911	51.2076
WBGene00046230	21ur-1835	IV	15912426	15912446	-1	0.0016739	-1.82485	8.47764	7.34866	8.287	28.6566	28.2491	27.0262
WBGene00046231	21ur-102	IV	14265720	14265740	1	7.64828e-06	1.08361	689.515	853.914	607.713	314.217	330.47	374.1
WBGene00046232	21ur-1053	IV	14481731	14481751	1	2.59136e-05	3.48328	16.9553	16.167	24.861	2.51373	2.24199	0
WBGene00046233	21ur-4845	IV	14951696	14951716	1	9.76082e-06	-1.68393	31.0847	20.5762	19.3363	74.9092	78.9182	68.988
WBGene00046234	21ur-2303	IV	15627048	15627068	-1	0.814555	0.60503	2.82588	0	5.52467	3.01648	0.448399	1.42243
WBGene00046235	21ur-3441	IV	15360101	15360121	1	0.488282	3.03535	0	4.40919	0	0.502747	0	0
WBGene00046236	21ur-4426	IV	16825885	16825905	1	0.000934567	-1.4776	11.3035	32.3341	19.3363	70.8873	60.5338	56.1861
WBGene00046237	21ur-1968	IV	14493147	14493167	-1	0.972529	0.0700752	16.9553	16.167	16.574	22.1208	13.452	11.3795
WBGene00046238	21ur-5086	IV	15258834	15258854	1	0.346129	-0.228155	299.543	238.096	240.323	354.436	286.078	264.573
WBGene00046239	21ur-881	IV	16191948	16191968	-1	0.000192566	-4.95073	0	1.46973	0	29.1593	26.0071	19.2029
WBGene00046240	21ur-4792	IV	14987901	14987921	1	0.000757067	-0.8976	81.9506	69.0774	63.5337	140.769	108.961	149.356
WBGene00046241	21ur-3516	IV	16085325	16085345	1	0.332502	-1.97634	0	0	2.76233	4.52472	2.24199	2.84487
WBGene00046242	21ur-4291	IV	15477247	15477267	1	0.266942	0.648032	22.6071	20.5762	22.0987	16.0879	11.21	14.2243
WBGene00046243	21ur-4581	IV	16072440	16072460	-1	#N/A	#N/A	0	0	0	0	0	0
WBGene00046244	21ur-4326	IV	14226366	14226386	-1	2.57557e-30	3.09038	440.838	276.309	428.162	60.3296	34.5267	38.4057
WBGene00046245	21ur-4965	IV	5419651	5419671	1	1.91788e-11	3.6298	33.9106	42.6222	46.9597	2.01099	4.93238	2.84487
WBGene00046246	21ur-4605	IV	14674166	14674186	-1	2.05339e-30	1.8633	658.43	530.573	580.09	141.775	162.32	181.36
WBGene00046247	21ur-572	IV	16898438	16898458	-1	0.769974	0.154249	84.7764	105.821	63.5337	76.9202	94.6121	59.7422
WBGene00046248	21ur-197	IV	17051044	17051064	-1	2.08754e-13	-1.05469	1381.86	1841.57	1825.9	3485.54	3384.96	3638.59
WBGene00046249	21ur-1283	IV	14423518	14423538	1	1.50858e-44	4.06462	1353.6	1607.89	1593.87	80.4395	89.2313	103.126
WBGene00046250	21ur-2119	IV	6183393	6183413	-1	0.0526423	1.05937	19.7812	22.046	30.3857	10.0549	11.6584	12.8019
WBGene00046251	21ur-579	IV	14322337	14322357	-1	0.266724	-1.42252	2.82588	0	8.287	11.5632	9.41637	4.2673
WBGene00046252	21ur-390	IV	5181672	5181692	1	0.640551	1.71421	0	1.46973	2.76233	0	0	1.42243
WBGene00046253	21ur-5384	IV	15101237	15101257	1	8.82799e-07	-1.0454	243.026	227.808	196.126	434.373	389.21	556.883
WBGene00046254	21ur-1273	IV	15869521	15869541	1	0.808941	-0.0692934	539.743	530.573	533.13	545.48	541.217	596
WBGene00046255	21ur-1038	IV	14997273	14997293	-1	6.12219e-11	2.2136	67.8212	69.0774	71.8207	15.5851	13.9004	15.6468
WBGene00046256	21ur-3196	IV	15544982	15545002	1	1.38074e-102	4.09834	844.939	949.446	806.601	51.7829	51.1174	49.074
WBGene00046257	21ur-4577	IV	6185415	6185435	1	6.9632e-06	1.90035	48.04	45.5617	80.1077	20.6126	11.6584	13.5131
WBGene00046258	21ur-654	IV	15146595	15146615	-1	0.450922	1.24028	8.47764	0	2.76233	1.50824	1.79359	0.711217
WBGene00046259	21ur-4511	IV	14890805	14890825	-1	0.000100789	-1.50055	16.9553	26.4552	24.861	65.8598	68.1566	64.0095
WBGene00046260	21ur-2695	IV	15655042	15655062	-1	1	-0.195935	0	0	0	0.502747	0.896797	0
WBGene00046261	21ur-4114	IV	5612254	5612274	-1	0.569208	0.628407	16.9553	7.34866	11.0493	11.0604	7.17438	3.55609
WBGene00046262	21ur-21	IV	6186929	6186949	1	0.284416	2.33317	5.65176	4.40919	0	1.50824	0.448399	0
WBGene00046263	21ur-3635	IV	15945883	15945903	1	0.733032	-0.750424	2.82588	1.46973	0	2.51373	3.13879	1.42243
WBGene00046264	21ur-1258	IV	14392623	14392643	1	1.85822e-58	3.22962	449.315	429.161	408.825	44.7444	40.3559	53.3413
WBGene00046265	21ur-2903	IV	16384155	16384175	-1	0.0410652	-0.40068	1189.7	1249.27	1046.92	1526.34	1360.44	1722.57
WBGene00046266	21ur-4849	IV	15772384	15772404	-1	3.40273e-07	4.11087	31.0847	26.4552	13.8117	2.51373	1.3452	0
WBGene00046267	21ur-297	IV	6195544	6195564	1	0.162817	-2.78782	0	0	0	3.01648	4.03559	1.42243
WBGene00046268	21ur-416	IV	14871549	14871569	1	0.693174	-1.69812	0	0	0	1.50824	1.79359	0.711217
WBGene00046269	21ur-4638	IV	14508127	14508147	-1	0.308661	-0.594147	16.9553	35.2735	16.574	32.6785	39.4591	37.6945
WBGene00046270	21ur-2058	IV	5072747	5072767	-1	3.53839e-28	4.20149	98.9059	120.518	138.117	6.03296	5.38078	8.5346
WBGene00046271	21ur-1762	IV	15171426	15171446	1	0.103628	-0.471912	67.8212	94.0628	63.5337	105.577	92.8185	124.463
WBGene00046272	21ur-4915	IV	5342519	5342539	-1	1.05943e-16	4.30588	53.6917	64.6682	66.296	4.02197	4.03559	0.711217
WBGene00046273	21ur-4134	IV	14475277	14475297	-1	0.0680632	-0.609206	96.08	76.426	82.87	147.807	141.246	96.0143
WBGene00046274	21ur-597	IV	16207352	16207372	1	0.156189	-0.891555	8.47764	17.6368	8.287	27.1483	22.8683	18.4916
WBGene00046275	21ur-1241	IV	13609342	13609362	-1	0.613032	1.44146	0	0	8.287	0.502747	2.24199	0
WBGene00046276	21ur-3809	IV	16705110	16705130	1	0.40885	0.215755	847.764	670.197	566.278	534.922	588.299	670.678
WBGene00046277	21ur-2131	IV	14590598	14590618	1	0.69168	0.293632	22.6071	13.2276	33.148	20.1099	17.0391	16.358
WBGene00046278	21ur-610	IV	16112671	16112691	-1	0.481506	1.00475	11.3035	0	11.0493	5.02747	3.58719	1.42243
WBGene00046279	21ur-2442	IV	15921889	15921909	-1	6.86299e-14	3.61042	48.04	64.6682	71.8207	8.04395	4.48399	2.13365
WBGene00046280	21ur-3189	IV	17202863	17202883	-1	5.1281e-15	2.89424	101.732	121.988	104.969	21.1154	8.07118	15.6468
WBGene00046281	21ur-606	IV	16020311	16020331	-1	0.731212	-0.378776	11.3035	7.34866	11.0493	17.5961	13.0036	6.40095
WBGene00046282	21ur-1640	IV	17050724	17050744	1	0.697947	0.724719	8.47764	1.46973	0	1.50824	1.3452	2.84487
WBGene00046283	21ur-499	IV	15747709	15747729	1	0.555205	1.45254	0	5.87892	0	2.01099	0.448399	0
WBGene00046284	21ur-5242	IV	14526835	14526855	1	3.9726e-06	2.22351	36.7365	63.1984	30.3857	11.0604	6.72598	11.3795
WBGene00046285	21ur-311	IV	16838685	16838705	1	0.351788	-0.738452	299.543	349.796	309.381	587.208	515.21	497.852
WBGene00046286	21ur-5233	IV	14354650	14354670	-1	0.0024792	-1.39253	11.3035	20.5762	13.8117	45.7499	43.0463	37.6945
WBGene00046287	21ur-4694	IV	14244607	14244627	-1	7.37907e-11	3.1193	79.1247	105.821	33.148	6.53571	9.86477	9.24582
WBGene00046288	21ur-2915	IV	16733050	16733070	1	0.993187	0.331791	0	0	0	0.502747	0.448399	0
WBGene00046289	21ur-5066	IV	17238857	17238877	1	0.893016	0.345975	5.65176	1.46973	2.76233	2.51373	3.13879	1.42243
WBGene00046290	21ur-5038	IV	15657510	15657530	-1	1.13512e-54	3.93436	339.106	273.37	406.063	22.1208	21.9715	22.0477
WBGene00046291	21ur-337	IV	13754641	13754661	1	4.28405e-12	3.97519	45.2141	42.6222	46.9597	3.01648	2.69039	2.84487
WBGene00046292	21ur-1079	IV	16175955	16175975	-1	7.9289e-05	-1.06278	149.772	169.019	96.6817	286.063	268.591	325.737
WBGene00046293	21ur-1702	IV	16838691	16838711	-1	1.41168e-22	3.23935	570.828	377.721	284.52	32.6785	37.6655	61.1647
WBGene00046294	21ur-2380	IV	5957514	5957534	-1	1	0	0	0	0	0	0	0
WBGene00046295	21ur-1206	IV	15278052	15278072	-1	2.05526e-09	-1.69333	39.5623	38.213	33.148	125.687	107.616	128.019
WBGene00046296	21ur-2530	IV	16183242	16183262	-1	0.000403213	-1.50316	25.4329	20.5762	8.287	59.8268	52.4626	44.0955
WBGene00046297	21ur-1234	IV	14239635	14239655	1	0.120547	-0.67477	25.4329	45.5617	16.574	48.7664	40.3559	61.1647
WBGene00046298	21ur-2468	IV	14881563	14881583	1	0.321499	-1.83977	0	0	2.76233	3.51923	3.58719	1.42243
WBGene00046299	21ur-1867	IV	15697322	15697342	1	0.0551164	3.46762	0	5.87892	11.0493	1.00549	0.448399	0
WBGene00046300	21ur-554	IV	14669639	14669659	1	0.00110751	-1.1222	2142.02	2701.37	1745.79	3077.31	4074.15	7202.49
WBGene00046301	21ur-4813	IV	15628232	15628252	-1	0.0440753	1.14721	22.6071	22.046	22.0987	6.53571	8.07118	16.358
WBGene00046302	21ur-2374	IV	15164703	15164723	1	1.13513e-07	-0.957456	466.27	461.496	348.054	909.469	720.128	857.728
WBGene00046303	21ur-4759	IV	15820813	15820833	-1	0.207181	-2.36641	0	1.46973	0	5.02747	3.13879	4.2673
WBGene00046304	21ur-5112	IV	13615765	13615785	-1	1.26797e-12	3.43566	67.8212	63.1984	44.1973	5.02747	4.48399	7.11217
WBGene00046305	21ur-3997	IV	16092545	16092565	1	0.00590112	3.99584	8.47764	4.40919	13.8117	0.502747	0.448399	0.711217
WBGene00046306	21ur-1913	IV	16718714	16718734	1	#N/A	#N/A	0	0	0	0	0	0
WBGene00046307	21ur-648	IV	15864182	15864202	-1	1.14951e-09	-1.40676	223.245	255.733	162.978	597.263	506.242	616.625
WBGene00046308	21ur-362	IV	15245736	15245756	-1	7.18402e-19	5.65812	104.558	76.426	58.009	1.00549	2.69039	0.711217
WBGene00046309	21ur-2727	IV	16069473	16069493	-1	0.0468435	2.90171	19.7812	1.46973	2.76233	2.01099	0.896797	0
WBGene00046310	21ur-4644	IV	14009393	14009413	1	0.12973	-1.41597	2.82588	7.34866	0	12.5687	10.7616	9.24582
WBGene00046311	21ur-245	IV	16699591	16699611	-1	0.0166551	0.490521	469.096	573.195	483.408	326.283	331.367	435.265
WBGene00046312	21ur-2870	IV	16252310	16252330	-1	0.264749	-0.558678	22.6071	23.5157	35.9103	41.2252	51.5658	24.8926
WBGene00046313	21ur-3912	IV	5820979	5820999	1	0.000154192	3.14854	8.47764	16.167	22.0987	2.01099	1.79359	1.42243
WBGene00046314	21ur-5435	IV	16254982	16255002	-1	0.0139051	1.99561	36.7365	10.2881	5.52467	3.51923	4.93238	4.2673
WBGene00046315	21ur-4869	IV	14976397	14976417	1	3.25136e-22	2.37314	339.106	405.646	375.677	56.8104	66.363	95.3031
WBGene00046316	21ur-5262	IV	13824165	13824185	1	8.32396e-07	-0.941298	172.379	202.823	171.265	337.846	321.502	402.549
WBGene00046317	21ur-3509	IV	15660307	15660327	1	0.000169534	-1.24719	19.7812	45.5617	30.3857	82.4504	74.4342	85.346
WBGene00046318	21ur-4870	IV	5099574	5099594	1	0.738428	-1.39227	0	0	0	0.502747	2.69039	0
WBGene00046319	21ur-193	IV	4845245	4845265	1	0.534472	2.03518	0	1.46973	0	0.502747	0	0
WBGene00046320	21ur-2840	IV	14747096	14747116	1	0.000175004	4.59588	22.6071	5.87892	13.8117	0.502747	0	1.42243
WBGene00046321	21ur-3611	IV	5925397	5925417	1	#N/A	#N/A	0	0	0	0	0	0
WBGene00046322	21ur-3919	IV	16239449	16239469	1	0.522303	-0.276516	121.513	107.29	63.5337	106.582	106.719	143.666
WBGene00046323	21ur-3143	IV	17015779	17015799	-1	0.00195996	-1.80355	5.65176	11.7578	5.52467	28.6566	30.0427	29.1599
WBGene00046324	21ur-2168	IV	15220415	15220435	-1	0.307212	-0.391376	36.7365	39.6827	63.5337	56.3076	59.637	64.7207
WBGene00046325	21ur-2449	IV	15732697	15732717	1	0.00300522	5.07545	8.47764	5.87892	5.52467	0	0	0.711217
WBGene00046326	21ur-585	IV	15214367	15214387	-1	3.79448e-05	1.67004	45.2141	41.1525	44.1973	11.0604	14.3488	15.6468
WBGene00046327	21ur-67	IV	5505629	5505649	-1	0.977797	-0.455508	0	0	0	1.00549	0	0.711217
WBGene00046328	21ur-456	IV	15118472	15118492	-1	0.0324457	-0.735328	31.0847	41.1525	30.3857	63.3461	58.2918	54.0525
WBGene00046329	21ur-2278	IV	15066797	15066817	-1	0.893016	1.09186	0	0	0	0	0.448399	0
WBGene00046330	21ur-4031	IV	15810938	15810958	1	8.62965e-06	3.21995	19.7812	27.9249	19.3363	1.00549	4.03559	2.13365
WBGene00046331	21ur-4971	IV	15393157	15393177	-1	2.24449e-36	2.59874	254.329	304.234	270.709	48.7664	45.2883	43.3842
WBGene00046332	21ur-3261	IV	15115332	15115352	1	0.964817	-0.569617	0	0	0	0	0.448399	1.42243
WBGene00046333	21ur-4319	IV	16732810	16732830	1	1.96426e-06	-1.52119	1186.87	1153.74	776.216	2467.48	2485.92	3999.88
WBGene00046334	21ur-4629	IV	16799770	16799790	-1	0.00442562	-1.14829	19.7812	20.5762	35.9103	49.2692	65.0178	49.7852
WBGene00046335	21ur-2814	IV	16167638	16167658	1	0.00162085	-0.689301	443.663	476.193	395.014	643.516	593.231	891.866
WBGene00046336	21ur-1248	IV	5932726	5932746	-1	0.695261	-1.08641	0	0	2.76233	1.50824	2.24199	1.42243
WBGene00046337	21ur-2162	IV	5833693	5833713	-1	0.86141	1.31648	0	1.46973	0	0	0.896797	0
WBGene00046338	21ur-5002	IV	13699915	13699935	-1	0.893016	1.09186	0	0	0	0	0.448399	0
WBGene00046339	21ur-3454	IV	14382935	14382955	-1	1.75643e-20	-1.76819	118.687	146.973	171.265	516.823	549.288	422.463
WBGene00046340	21ur-5029	IV	15495936	15495956	-1	0.000192426	2.74411	25.4329	14.6973	13.8117	2.51373	3.13879	2.13365
WBGene00046341	21ur-1154	IV	16562186	16562206	-1	4.31316e-05	-1.47298	28.2588	42.6222	33.148	80.4395	105.374	111.661
WBGene00046342	21ur-2871	IV	16593668	16593688	1	0.127965	-1.697	2.82588	2.93946	2.76233	13.0714	9.41637	4.97852
WBGene00046343	21ur-2955	IV	15089824	15089844	1	3.63352e-56	2.96509	582.132	562.907	665.722	76.9202	66.363	89.6133
WBGene00046344	21ur-4309	IV	15662439	15662459	1	0.478041	-1.13852	2.82588	4.40919	0	7.5412	4.48399	5.68974
WBGene00046345	21ur-3647	IV	15815227	15815247	1	2.73429e-05	-1.03139	76.2988	63.1984	74.583	158.868	145.73	125.174
WBGene00046346	21ur-4399	IV	13987340	13987360	-1	9.7982e-07	2.93669	16.9553	41.1525	55.2467	4.52472	5.38078	4.97852
WBGene00046347	21ur-1187	IV	15904582	15904602	1	9.07529e-05	-2.3901	8.47764	8.81839	2.76233	39.717	39.0107	32.0048
WBGene00046348	21ur-342	IV	15160810	15160830	1	3.32787e-20	-1.52373	347.583	421.813	444.736	1141.23	1211.12	1147.19
WBGene00046349	21ur-1886	IV	14159715	14159735	1	0.0138512	-1.67369	11.3035	8.81839	5.52467	36.1978	29.5943	15.6468
WBGene00046350	21ur-3314	IV	13701023	13701043	1	0.512359	1.66927	0	7.34866	2.76233	2.01099	0	1.42243
WBGene00046351	21ur-3150	IV	15399455	15399475	1	0.394452	-1.13942	2.82588	0	11.0493	10.0549	7.62278	9.24582
WBGene00046352	21ur-3433	IV	5761176	5761196	-1	3.44848e-06	3.15564	16.9553	22.046	41.435	3.01648	3.58719	2.13365
WBGene00046353	21ur-2960	IV	14125770	14125790	1	0.0688287	3.07048	2.82588	4.40919	5.52467	0.502747	0.896797	0
WBGene00046354	21ur-4268	IV	14895171	14895191	1	2.27482e-10	3.02676	53.6917	52.9103	60.7713	9.55218	6.27758	4.2673
WBGene00046355	21ur-4549	IV	5803585	5803605	1	#N/A	#N/A	0	0	0	0	0	0
WBGene00046356	21ur-4831	IV	14368459	14368479	1	1	0.00110761	76.2988	72.0168	55.2467	76.4175	62.7758	65.432
WBGene00046357	21ur-2820	IV	15366573	15366593	-1	7.25028e-13	2.20037	163.901	119.048	127.067	28.6566	30.0427	29.8711
WBGene00046358	21ur-4185	IV	14569218	14569238	-1	1.62889e-07	-1.34786	146.946	176.368	129.83	319.244	353.338	494.296
WBGene00046359	21ur-1750	IV	4961243	4961263	-1	0.255203	3.35203	2.82588	2.93946	0	0	0.448399	0
WBGene00046360	21ur-4712	IV	14564280	14564300	1	0.255723	0.661695	22.6071	29.3946	52.4843	29.662	22.8683	12.0907
WBGene00046361	21ur-5450	IV	14495784	14495804	1	0.658821	0.247677	76.2988	217.52	88.3947	85.9697	118.826	125.174
WBGene00046362	21ur-3114	IV	14489179	14489199	1	0.0152298	-0.943255	36.7365	83.7747	30.3857	86.9752	111.651	108.105
WBGene00046363	21ur-4436	IV	15422228	15422248	1	4.12487e-63	2.69997	1150.13	1050.86	1356.31	168.42	202.676	174.248
WBGene00046364	21ur-4924	IV	16253668	16253688	1	0.593206	1.15105	0	1.46973	8.287	0.502747	2.24199	1.42243
WBGene00046365	21ur-532	IV	16782419	16782439	-1	2.33008e-06	3.06751	25.4329	16.167	46.9597	2.51373	3.58719	4.2673
WBGene00046366	21ur-673	IV	16177805	16177825	-1	0.0765566	-2.43032	0	2.93946	0	7.03845	9.41637	5.68974
WBGene00046367	21ur-3062	IV	16718183	16718203	-1	0.0140674	3.16518	2.82588	13.2276	5.52467	1.50824	0.896797	0
WBGene00046368	21ur-920	IV	14267967	14267987	-1	0.00202912	-2.5096	5.65176	7.34866	0	35.695	31.8363	14.2243
WBGene00046369	21ur-4717	IV	14969969	14969989	-1	0.352556	-1.01749	5.65176	0	11.0493	9.04944	12.5552	7.11217
WBGene00046370	21ur-3175	IV	14741860	14741880	1	0.0122397	-0.948415	90.4282	80.8352	35.9103	104.069	114.342	187.05
WBGene00046371	21ur-1570	IV	15961111	15961131	1	0.988544	0.386921	0	0	0	0	0.896797	0
WBGene00046372	21ur-4897	IV	15273825	15273845	1	0.99772	0.120711	0	0	2.76233	0.502747	0.448399	1.42243
WBGene00046373	21ur-4857	IV	16107311	16107331	1	9.2786e-05	-1.00345	511.485	509.997	309.381	708.873	849.267	1120.17
WBGene00046374	21ur-4539	IV	14976503	14976523	1	0.00189547	-1.04516	39.5623	24.9854	30.3857	66.8653	64.121	57.6086
WBGene00046375	21ur-3397	IV	16112451	16112471	-1	1	0	0	0	0	0	0	0
WBGene00046376	21ur-81	IV	17173257	17173277	-1	0.504313	-0.940531	5.65176	2.93946	0	6.53571	4.93238	4.97852
WBGene00046377	21ur-3921	IV	16792626	16792646	-1	0.893016	-0.471755	5.65176	0	0	5.02747	1.79359	0
WBGene00046378	21ur-1103	IV	4840702	4840722	-1	1	0	0	0	0	0	0	0
WBGene00046379	21ur-147	IV	14395216	14395236	-1	0.000572325	-1.09094	33.9106	38.213	71.8207	103.063	101.338	94.5919
WBGene00046380	21ur-3107	IV	16281978	16281998	1	0.893016	1.09187	0	0	0	0	0.448399	0
WBGene00046381	21ur-4508	IV	16557825	16557845	-1	0.0888122	0.696485	67.8212	64.6682	55.2467	26.1428	43.4947	46.9403
WBGene00046382	21ur-5258	IV	14457023	14457043	-1	1	0	0	0	0	0	0	0
WBGene00046383	21ur-3174	IV	14250081	14250101	-1	0.998188	0.149122	0	2.93946	0	0.502747	2.69039	0
WBGene00046384	21ur-4931	IV	15821329	15821349	-1	1.24822e-05	-1.08864	152.598	101.411	116.018	289.079	265.9	219.055
WBGene00046385	21ur-5441	IV	14735127	14735147	-1	0.630271	2.09239	2.82588	0	0	0	0.448399	0
WBGene00046386	21ur-1119	IV	15483473	15483493	1	0.959443	-0.285162	0	1.46973	0	1.00549	1.79359	0
WBGene00046387	21ur-350	IV	15719723	15719743	1	0.305519	0.427727	48.04	39.6827	55.2467	37.706	38.1139	27.7375
WBGene00046388	21ur-5106	IV	15180632	15180652	1	9.56079e-09	3.02981	62.1694	70.5471	22.0987	9.55218	5.82918	3.55609
WBGene00046389	21ur-492	IV	15389512	15389532	1	0.0038219	-0.830463	921.237	1042.04	776.216	1251.34	1422.32	2206.2
WBGene00046390	21ur-1602	IV	14249986	14250006	1	2.82292e-31	3.03709	268.459	258.673	262.422	33.1813	29.1459	34.1384
WBGene00046391	21ur-2720	IV	16728095	16728115	1	0.00362695	-0.634585	336.28	451.207	566.278	767.191	745.687	588.176
WBGene00046392	21ur-2453	IV	14908748	14908768	-1	0.592241	0.961704	8.47764	1.46973	2.76233	2.51373	2.69039	0.711217
WBGene00046393	21ur-5287	IV	16605821	16605841	1	0.0127795	3.08209	14.1294	13.2276	0	2.01099	0	1.42243
WBGene00046394	21ur-1503	IV	15421668	15421688	1	5.61131e-07	-1.91733	36.7365	16.167	33.148	108.593	99.5445	97.4367
WBGene00046395	21ur-4681	IV	13727066	13727086	-1	0.626979	-0.670529	0	8.81839	2.76233	3.01648	6.27758	12.8019
WBGene00046396	21ur-5414	IV	15687820	15687840	1	0.0284125	4.5572	2.82588	2.93946	8.287	0.502747	0	0
WBGene00046397	21ur-1460	IV	15914825	15914845	1	1	-0.190534	0	0	0	0.502747	0.896797	0
WBGene00046398	21ur-2584	IV	13762282	13762302	-1	0.00607299	-1.49641	14.1294	69.0774	19.3363	73.9037	139.452	94.5919
WBGene00046399	21ur-2750	IV	16244086	16244106	1	8.599e-05	3.7072	19.7812	10.2881	13.8117	0	1.3452	2.13365
WBGene00046400	21ur-769	IV	17156745	17156765	1	4.69128e-05	-1.49573	31.0847	26.4552	13.8117	60.8323	66.8114	77.5227
WBGene00046401	21ur-2251	IV	15555447	15555467	-1	0.235834	-2.64291	0	0	0	2.01099	3.58719	2.13365
WBGene00046402	21ur-954	IV	5438539	5438559	1	3.90799e-05	-1.11379	70.647	63.1984	55.2467	136.244	141.694	130.864
WBGene00046403	21ur-3642	IV	16716264	16716284	-1	0.0223736	-0.755835	322.15	493.83	436.449	601.285	621.032	900.401
WBGene00046404	21ur-4955	IV	5193423	5193443	-1	1.26504e-14	3.42143	50.8659	70.5471	66.296	4.02197	6.72598	7.11217
WBGene00046405	21ur-1198	IV	6180344	6180364	-1	0.952011	-0.0971046	11.3035	10.2881	8.287	9.04944	14.7972	7.82339
WBGene00046406	21ur-5338	IV	14369172	14369192	-1	3.00596e-05	-0.957086	129.991	149.913	129.83	237.296	253.345	312.935
WBGene00046407	21ur-1897	IV	15678016	15678036	1	0.750672	0.244553	39.5623	26.4552	44.1973	35.1923	31.3879	24.1814
WBGene00046408	21ur-1525	IV	15433612	15433632	-1	0.374334	1.93609	2.82588	2.93946	0	0	0.896797	0.711217
WBGene00046409	21ur-241	IV	14624948	14624968	-1	0.00172258	-1.93989	2.82588	11.7578	5.52467	32.1758	34.0783	20.6253
WBGene00046410	21ur-645	IV	13706049	13706069	-1	7.94689e-79	4.53972	587.783	584.953	480.646	21.1154	22.4199	28.4487
WBGene00046411	21ur-4453	IV	16897545	16897565	1	3.37431e-45	4.67832	186.508	182.247	220.987	9.55218	6.27758	7.11217
WBGene00046412	21ur-3834	IV	15087132	15087152	-1	0.701917	2.02726	0	1.46973	0	0	0.448399	0
WBGene00046413	21ur-4212	IV	15232644	15232664	1	0.0656364	3.71175	5.65176	7.34866	2.76233	0	0	1.42243
WBGene00046414	21ur-4330	IV	15981548	15981568	1	3.47135e-05	2.24777	36.7365	27.9249	30.3857	4.02197	8.07118	7.82339
WBGene00046415	21ur-1906	IV	15707250	15707270	-1	0.621754	0.180191	887.327	918.582	809.364	675.189	636.278	999.971
WBGene00046416	21ur-3796	IV	5614621	5614641	-1	0.944535	-0.365968	2.82588	0	0	2.01099	0.448399	0.711217
WBGene00046417	21ur-1212	IV	4876800	4876820	1	0.716441	-0.699972	5.65176	0	2.76233	3.01648	7.62278	0.711217
WBGene00046418	21ur-1310	IV	15413573	15413593	-1	0.29139	3.03583	2.82588	2.93946	2.76233	1.00549	0	0
WBGene00046419	21ur-1228	IV	16363632	16363652	1	1.24428e-08	3.30878	25.4329	42.6222	41.435	4.02197	3.58719	3.55609
WBGene00046420	21ur-403	IV	15621476	15621496	-1	#N/A	#N/A	0	0	0	0	0	0
WBGene00046421	21ur-281	IV	5721217	5721237	1	1	0	0	0	0	0	0	0
WBGene00046422	21ur-5358	IV	14668197	14668217	1	0.000373939	-1.19145	31.0847	36.7433	41.435	87.4779	90.5765	71.1217
WBGene00046423	21ur-4341	IV	14587486	14587506	1	0.0657296	0.707584	104.558	117.578	74.583	50.7774	53.3594	80.3675
WBGene00046424	21ur-1084	IV	5119729	5119749	1	#N/A	#N/A	0	0	0	0	0	0
WBGene00046425	21ur-3843	IV	5896155	5896175	1	0.0877142	-0.445872	110.209	120.518	88.3947	149.818	136.762	154.334
WBGene00046426	21ur-3120	IV	14408847	14408867	-1	0.827253	-0.0947262	406.927	457.086	281.758	443.422	381.587	405.394
WBGene00046427	21ur-5254	IV	16799356	16799376	-1	0.990701	0.260646	0	1.46973	0	1.50824	0.448399	0
WBGene00046428	21ur-2285	IV	16069992	16070012	-1	2.62156e-19	2.07189	254.329	214.581	287.283	71.8928	56.0498	49.7852
WBGene00046429	21ur-5109	IV	15997222	15997242	-1	6.52791e-08	-1.49478	421.056	462.965	259.659	908.463	921.459	1409.63
WBGene00046430	21ur-4986	IV	14568960	14568980	1	0.00136579	-0.81777	59.3435	83.7747	80.1077	143.786	127.794	128.019
WBGene00046431	21ur-3927	IV	14704960	14704980	-1	0.834727	0.431424	5.65176	4.40919	0	1.00549	4.48399	2.13365
WBGene00046432	21ur-2097	IV	14728245	14728265	1	0.710173	2.1022	2.82588	0	0	0.502747	0	0
WBGene00046433	21ur-3008	IV	15273585	15273605	1	0.740474	0.405355	5.65176	5.87892	16.574	7.03845	6.27758	7.11217
WBGene00046434	21ur-755	IV	13874671	13874691	1	0.792875	1.37023	0	0	2.76233	0	0.896797	0
WBGene00046435	21ur-1626	IV	5035214	5035234	-1	0.0275133	-1.01838	33.9106	8.81839	24.861	46.2527	42.5979	35.5609
WBGene00046436	21ur-4588	IV	5099218	5099238	1	0.893016	1.09186	0	0	0	0.502747	0	0
WBGene00046437	21ur-1146	IV	5149287	5149307	-1	5.16419e-32	3.56819	505.833	367.433	265.184	22.6236	34.0783	39.8282
WBGene00046438	21ur-2159	IV	15346684	15346704	1	0.908124	0.0739891	59.3435	49.9709	60.7713	38.7115	58.2918	63.2983
WBGene00046439	21ur-2711	IV	17046023	17046043	1	0.290137	-1.51385	2.82588	2.93946	0	7.5412	4.03559	6.40095
WBGene00046440	21ur-1703	IV	14234237	14234257	1	0.139071	-0.612317	56.5176	89.6536	91.157	141.272	137.658	86.0573
WBGene00046441	21ur-2888	IV	5335354	5335374	1	2.73429e-05	4.14659	19.7812	22.046	13.8117	1.50824	0.896797	0.711217
WBGene00046442	21ur-4458	IV	15609485	15609505	1	0.0862512	-0.554516	56.5176	80.8352	60.7713	109.599	91.4733	96.7255
WBGene00046443	21ur-2030	IV	15967787	15967807	-1	9.31394e-05	-2.15438	2.82588	13.2276	5.52467	36.1978	36.3203	39.1169
WBGene00046444	21ur-2920	IV	15245179	15245199	-1	0.641729	2.98662	0	1.46973	0	0	0	0
WBGene00046445	21ur-2974	IV	14144752	14144772	-1	1.58694e-12	-2.43924	28.2588	14.6973	24.861	108.091	118.377	118.062
WBGene00046446	21ur-4004	IV	15918086	15918106	-1	1.1013e-15	2.55261	96.08	80.8352	80.1077	15.0824	12.5552	16.358
WBGene00046447	21ur-701	IV	16122701	16122721	1	0.0323443	-1.74343	11.3035	1.46973	2.76233	16.0879	15.694	12.8019
WBGene00046448	21ur-1423	IV	4942507	4942527	-1	0.893016	-0.505976	2.82588	0	0	1.50824	1.79359	0
WBGene00046449	21ur-4410	IV	15486615	15486635	-1	0.893016	1.09186	0	0	0	0.502747	0	0
WBGene00046450	21ur-2410	IV	16380638	16380658	1	1.67893e-20	3.20199	172.379	104.351	93.9193	13.5742	13.452	12.8019
WBGene00046451	21ur-3016	IV	15835924	15835944	-1	1.32675e-05	1.05724	118.687	155.792	176.789	76.9202	65.0178	76.1002
WBGene00046452	21ur-5355	IV	15532638	15532658	-1	0.475151	-1.54205	0	1.46973	0	1.50824	2.69039	2.84487
WBGene00046453	21ur-5040	IV	14635051	14635071	-1	#N/A	#N/A	0	0	0	0	0	0
WBGene00046454	21ur-1439	IV	13612687	13612707	1	4.38708e-05	3.68016	11.3035	22.046	16.574	0.502747	0.448399	3.55609
WBGene00046455	21ur-156	IV	15592496	15592516	-1	0.400889	-0.28322	144.12	174.898	118.78	169.426	150.662	220.477
WBGene00046456	21ur-234	IV	14681084	14681104	1	0.111953	-1.94104	0	4.40919	0	8.04395	7.62278	7.82339
WBGene00046457	21ur-4951	IV	13828642	13828662	1	6.21496e-13	-2.09892	53.6917	72.0168	35.9103	234.28	252	231.857
WBGene00046458	21ur-753	IV	15793319	15793339	1	0.00132227	4.93423	5.65176	19.1065	5.52467	0.502747	0.448399	0
WBGene00046459	21ur-5280	IV	16529118	16529138	-1	0.636031	3.06977	2.82588	0	0	0	0	0
WBGene00046460	21ur-2847	IV	5213742	5213762	1	0.000342492	2.59534	48.04	11.7578	30.3857	4.02197	1.79359	9.24582
WBGene00046461	21ur-2142	IV	16387132	16387152	1	0.0072617	-2.12659	8.47764	1.46973	5.52467	18.0989	16.5907	24.1814
WBGene00046462	21ur-4554	IV	14502715	14502735	-1	0.820026	0.0618571	4453.59	5210.2	4740.16	4361.33	4475.02	4971.41
WBGene00046463	21ur-83	IV	5979490	5979510	1	0.80881	0.213033	16.9553	33.8038	16.574	13.5742	27.3523	19.9141
WBGene00046464	21ur-1768	IV	15664760	15664780	-1	0.00656565	3.05453	8.47764	11.7578	8.287	0.502747	2.69039	0
WBGene00046465	21ur-871	IV	15314222	15314242	1	0.315713	-2.06508	0	2.93946	0	7.5412	6.27758	2.13365
WBGene00046466	21ur-158	IV	13807551	13807571	1	0.893016	1.09185	0	0	0	0.502747	0	0
WBGene00046467	21ur-1494	IV	16887948	16887968	-1	0.0120977	-3.84649	0	0	0	8.04395	6.72598	2.84487
WBGene00046468	21ur-2203	IV	14011651	14011671	1	0.0141719	1.20114	25.4329	23.5157	38.6727	15.5851	10.3132	11.3795
WBGene00046469	21ur-1141	IV	13842496	13842516	-1	0.607794	2.08973	0	0	2.76233	0.502747	0	0
WBGene00046470	21ur-4814	IV	15098667	15098687	1	2.1473e-05	-1.02935	268.459	301.295	232.036	584.192	519.694	541.236
WBGene00046471	21ur-115	IV	16909225	16909245	-1	0.000913186	-2.01467	2.82588	8.81839	8.287	22.6236	26.9039	36.9833
WBGene00046472	21ur-4852	IV	15267467	15267487	1	0.0292776	-0.951531	39.5623	24.9854	22.0987	52.2856	66.8114	44.8067
WBGene00046473	21ur-2731	IV	15922059	15922079	-1	0.000298595	3.08107	16.9553	20.5762	16.574	3.01648	1.3452	2.13365
WBGene00046474	21ur-2169	IV	16449251	16449271	-1	1	0	0	0	0	0	0	0
WBGene00046475	21ur-4430	IV	6039092	6039112	1	0.26662	-2.17484	0	0	0	2.51373	2.24199	0.711217
WBGene00046476	21ur-1163	IV	5499090	5499110	1	0.414448	4.57137	8.47764	0	5.52467	0	0.448399	0
WBGene00046477	21ur-2396	IV	15229392	15229412	-1	0.823442	1.38395	0	0	2.76233	0	0.896797	0
WBGene00046478	21ur-905	IV	5141919	5141939	-1	0.220039	2.08071	0	2.93946	8.287	0.502747	1.3452	0.711217
WBGene00046479	21ur-5125	IV	15864621	15864641	-1	0.0482271	1.43671	22.6071	23.5157	22.0987	12.5687	8.07118	4.2673
WBGene00046480	21ur-5361	IV	14049246	14049266	1	0.195113	-1.45195	0	1.46973	11.0493	17.0934	9.41637	4.2673
WBGene00046481	21ur-3075	IV	16990872	16990892	1	0.410015	3.05239	0	0	2.76233	0	0	0
WBGene00046482	21ur-97	IV	5952891	5952911	-1	0.000409049	2.71673	19.7812	17.6368	8.287	3.01648	1.3452	2.84487
WBGene00046483	21ur-4349	IV	14589710	14589730	-1	6.09659e-19	3.76457	115.861	92.5931	71.8207	5.53021	6.27758	9.24582
WBGene00046484	21ur-3812	IV	16985629	16985649	1	0.167465	2.495	2.82588	1.46973	8.287	0.502747	0.896797	0.711217
WBGene00046485	21ur-1976	IV	16044323	16044343	1	0.439253	3.19697	2.82588	0	2.76233	0	0	0.711217
WBGene00046486	21ur-561	IV	15659478	15659498	-1	1	0	0	0	0	0	0	0
WBGene00046487	21ur-4518	IV	14832270	14832290	1	0.0161632	2.03127	14.1294	8.81839	11.0493	2.01099	2.69039	3.55609
WBGene00046488	21ur-351	IV	14646740	14646760	-1	0.939156	-0.596622	0	0	0	0.502747	0	1.42243
WBGene00046489	21ur-2187	IV	15273246	15273266	-1	3.00853e-12	2.24579	121.513	77.8958	132.592	21.1154	19.2811	29.1599
WBGene00046490	21ur-4475	IV	16563995	16564015	-1	0.000248355	-0.845397	166.727	132.276	107.731	263.942	204.021	261.728
WBGene00046491	21ur-1317	IV	14269698	14269718	1	0.0235047	-0.877445	48.04	33.8038	60.7713	93.5109	90.1281	70.4105
WBGene00046492	21ur-876	IV	15965746	15965766	-1	0.375913	-1.01835	2.82588	7.34866	0	8.54669	9.86477	5.68974
WBGene00046493	21ur-1996	IV	15590012	15590032	-1	1	0	0	0	0	0	0	0
WBGene00046494	21ur-4824	IV	14811539	14811559	-1	1	0	0	0	0	0	0	0
WBGene00046495	21ur-765	IV	16459561	16459581	-1	2.055e-10	1.30987	412.579	620.227	629.812	248.357	202.228	222.611
WBGene00046496	21ur-4253	IV	5418442	5418462	-1	0.0877142	-0.695307	56.5176	92.5931	46.9597	74.9092	117.929	134.42
WBGene00046497	21ur-3346	IV	14087433	14087453	-1	0.00983614	2.44118	11.3035	10.2881	8.287	2.01099	0.896797	2.84487
WBGene00046498	21ur-3866	IV	14289900	14289920	-1	2.62242e-12	1.77612	141.294	127.867	146.404	46.2527	34.0783	40.5394
WBGene00046499	21ur-3052	IV	14960988	14961008	1	0.242175	-0.500199	25.4329	27.9249	35.9103	49.2692	43.0463	32.0048
WBGene00046500	21ur-396	IV	15137752	15137772	1	0.00730452	-1.79932	8.47764	10.2881	5.52467	35.695	31.8363	19.9141
WBGene00046501	21ur-4401	IV	16696722	16696742	1	0.157941	-2.15448	0	0	5.52467	11.0604	4.93238	4.2673
WBGene00046502	21ur-4310	IV	15957046	15957066	-1	2.59367e-41	4.63323	310.847	364.493	273.471	15.0824	9.41637	14.2243
WBGene00046503	21ur-25	IV	14891432	14891452	1	0.000230936	0.766994	1056.88	1011.18	986.153	642.007	563.637	588.888
WBGene00046504	21ur-2355	IV	15867089	15867109	-1	0.80881	0.274042	8.47764	7.34866	60.7713	28.1538	18.8327	13.5131
WBGene00046505	21ur-1775	IV	14731632	14731652	-1	0.636023	3.06949	2.82588	0	0	0	0	0
WBGene00046506	21ur-1726	IV	16096237	16096257	-1	0.784987	1.10018	0	0	2.76233	0.502747	0	0.711217
WBGene00046507	21ur-204	IV	14856606	14856626	-1	0.893016	1.09185	0	0	0	0	0.448399	0
WBGene00046508	21ur-2708	IV	15872575	15872595	-1	0.150386	0.521704	81.9506	105.821	60.7713	49.7719	52.0142	76.1002
WBGene00046509	21ur-718	IV	5171322	5171342	-1	9.17983e-10	4.1859	48.04	42.6222	38.6727	4.02197	0.448399	2.84487
WBGene00046510	21ur-5088	IV	16886580	16886600	1	4.84787e-24	3.03719	146.946	111.7	121.543	13.0714	16.5907	16.358
WBGene00046511	21ur-5074	IV	5771392	5771412	-1	0.0224403	4.15169	2.82588	4.40919	11.0493	0	0.896797	0
WBGene00046512	21ur-4359	IV	16562712	16562732	-1	0.00531964	-1.9287	8.47764	5.87892	2.76233	24.1318	19.2811	22.0477
WBGene00046513	21ur-9	IV	14403686	14403706	1	0.00063272	-0.952777	48.04	92.5931	58.009	130.714	147.523	123.041
WBGene00046514	21ur-2087	IV	6991825	6991845	-1	6.86805e-08	3.10138	50.8659	42.6222	19.3363	3.51923	3.13879	7.11217
WBGene00046515	21ur-3136	IV	15811496	15811516	-1	0.482089	1.18053	0	14.6973	0	2.51373	4.03559	0.711217
WBGene00046516	21ur-212	IV	16794922	16794942	1	0.754029	-0.239096	25.4329	14.6973	22.0987	24.1318	23.7651	22.7589
WBGene00046517	21ur-5064	IV	17037586	17037606	1	4.11728e-07	3.67786	36.7365	14.6973	33.148	2.01099	2.24199	2.13365
WBGene00046518	21ur-1461	IV	15923720	15923740	1	1.66249e-12	3.85692	45.2141	51.4406	71.8207	6.03296	3.13879	2.13365
WBGene00046519	21ur-3531	IV	13956059	13956079	-1	1.79086e-06	-3.06888	2.82588	8.81839	2.76233	48.7664	52.911	38.4057
WBGene00046520	21ur-4566	IV	14534557	14534577	1	1.3585e-06	4.77194	14.1294	20.5762	22.0987	1.00549	0.896797	0
WBGene00046521	21ur-3755	IV	17154907	17154927	1	1.03876e-05	2.46784	25.4329	32.3341	22.0987	3.51923	6.72598	4.2673
WBGene00046522	21ur-5324	IV	5106850	5106870	-1	3.62179e-15	3.75787	87.6023	86.7141	33.148	5.02747	4.93238	5.68974
WBGene00046523	21ur-4766	IV	15281916	15281936	1	0.0807087	-2.87704	2.82588	0	0	8.54669	6.27758	2.84487
WBGene00046524	21ur-823	IV	13945668	13945688	1	3.61939e-11	-1.96905	53.6917	27.9249	35.9103	146.802	124.206	169.981
WBGene00046525	21ur-3001	IV	14683913	14683933	-1	0.327461	-2.26186	0	0	0	2.51373	1.3452	2.13365
WBGene00046526	21ur-1326	IV	14343120	14343140	1	8.39886e-15	2.75179	3891.24	3934.47	2748.52	349.912	438.534	783.05
WBGene00046527	21ur-4795	IV	14367228	14367248	-1	9.24754e-48	3.03849	406.927	365.963	356.341	55.3021	42.1495	39.1169
WBGene00046528	21ur-1581	IV	14372539	14372559	1	0.235844	-0.283317	141.294	116.109	129.83	158.868	142.142	165.714
WBGene00046529	21ur-1465	IV	16462203	16462223	1	1	0.0936805	0	0	5.52467	0.502747	1.3452	2.84487
WBGene00046530	21ur-5175	IV	6075215	6075235	-1	8.00122e-05	3.85208	14.1294	11.7578	19.3363	1.00549	1.79359	0
WBGene00046531	21ur-699	IV	14275852	14275872	1	0.787768	-1.26935	0	0	0	2.51373	0.448399	0
WBGene00046532	21ur-1585	IV	16003007	16003027	1	2.2164e-13	5.26574	53.6917	63.1984	27.6233	0.502747	0.896797	2.84487
WBGene00046533	21ur-3089	IV	5747179	5747199	-1	0.0021003	3.14978	11.3035	7.34866	16.574	1.00549	0.896797	2.13365
WBGene00046534	21ur-807	IV	15866991	15867011	1	4.8214e-11	-1.11197	378.668	343.917	240.323	736.021	674.392	679.212
WBGene00046535	21ur-1127	IV	13826078	13826098	1	0.678051	0.470868	11.3035	7.34866	5.52467	8.04395	5.38078	3.55609
WBGene00046536	21ur-2153	IV	14340303	14340323	-1	0.090757	-3.15897	0	0	0	1.50824	4.03559	5.68974
WBGene00046537	21ur-4574	IV	14604654	14604674	1	0.41911	1.54224	5.65176	1.46973	2.76233	0	1.79359	1.42243
WBGene00046538	21ur-1019	IV	14224018	14224038	-1	0.499532	1.01005	8.47764	7.34866	2.76233	5.02747	4.03559	0
WBGene00046539	21ur-3381	IV	16367493	16367513	1	0.000749536	0.770823	3492.79	3431.82	3828.59	1901.89	1840.68	2560.38
WBGene00046540	21ur-3819	IV	15410497	15410517	1	0.0147274	-0.428094	2266.36	2419.18	2477.81	2966.71	2916.38	3758.78
WBGene00046541	21ur-2417	IV	5803166	5803186	-1	0.867438	0.437913	0	1.46973	11.0493	4.52472	2.69039	1.42243
WBGene00046542	21ur-4463	IV	14830661	14830681	1	0.893016	0.626923	0	0	2.76233	0	0.896797	0.711217
WBGene00046543	21ur-619	IV	14982801	14982821	-1	0.0133801	-1.23873	5.65176	17.6368	22.0987	38.2087	40.8043	30.5823
WBGene00046544	21ur-1489	IV	15793080	15793100	1	0.985787	-0.265055	0	0	0	1.00549	0.448399	0
WBGene00046545	21ur-10	IV	16888197	16888217	-1	2.17433e-05	-1.22038	90.4282	70.5471	35.9103	161.884	131.381	169.27
WBGene00046546	21ur-583	IV	14560115	14560135	1	2.76901e-05	4.30796	14.1294	19.1065	16.574	0	2.24199	0
WBGene00046547	21ur-1688	IV	5124603	5124623	-1	0.000162947	-1.46963	67.8212	36.7433	80.1077	205.623	181.601	108.816
WBGene00046548	21ur-2743	IV	14230405	14230425	-1	0.618991	-1.29805	0	0	2.76233	2.51373	2.69039	0.711217
WBGene00046549	21ur-2149	IV	14297081	14297101	1	0.266526	-0.934552	5.65176	5.87892	13.8117	20.1099	13.452	12.8019
WBGene00046550	21ur-4356	IV	14600534	14600554	-1	0.397941	-0.313946	56.5176	80.8352	52.4843	94.0136	75.331	73.2554
WBGene00046551	21ur-2090	IV	13825040	13825060	1	0.000758082	-1.51228	19.7812	22.046	11.0493	44.2417	47.5303	65.432
WBGene00046552	21ur-3850	IV	15360777	15360797	1	0.00134481	-0.700187	220.419	170.489	138.117	262.434	259.623	336.406
WBGene00046553	21ur-1368	IV	16023875	16023895	-1	0.00116025	1.35896	56.5176	61.7287	52.4843	26.6456	24.6619	14.9356
WBGene00046554	21ur-1693	IV	16467302	16467322	-1	5.9832e-19	2.46563	406.927	432.101	259.659	49.7719	65.0178	86.0573
WBGene00046555	21ur-14	IV	16025550	16025570	-1	3.58523e-06	-1.05353	118.687	124.927	91.157	208.64	233.616	261.728
WBGene00046556	21ur-3338	IV	13600849	13600869	1	0.407196	1.14391	8.47764	4.40919	2.76233	3.01648	1.79359	2.13365
WBGene00046557	21ur-4736	IV	5594652	5594672	-1	0.407485	1.92247	0	2.93946	2.76233	0	0.896797	0.711217
WBGene00046558	21ur-1746	IV	17210623	17210643	-1	0.571873	-1.74778	0	0	0	0.502747	2.24199	1.42243
WBGene00046559	21ur-4068	IV	6048982	6049002	-1	1.73022e-07	3.38797	48.04	29.3946	19.3363	3.51923	2.24199	3.55609
WBGene00046560	21ur-2143	IV	15179130	15179150	-1	0.773028	1.24378	0	1.46973	0	0.502747	0.448399	0
WBGene00046561	21ur-3749	IV	15084091	15084111	1	0.541964	-0.640907	0	8.81839	11.0493	12.5687	11.21	8.5346
WBGene00046562	21ur-462	IV	14042459	14042479	-1	4.00646e-05	-1.39791	16.9553	57.3195	41.435	106.08	120.619	96.0143
WBGene00046563	21ur-4142	IV	13715593	13715613	-1	0.893016	1.09185	0	0	0	0.502747	0	0
WBGene00046564	21ur-1600	IV	13646753	13646773	1	0.811598	-1.12745	0	0	0	2.01099	0	0.711217
WBGene00046565	21ur-1195	IV	15268510	15268530	-1	3.17175e-14	3.78166	59.3435	57.3195	41.435	3.01648	5.38078	2.84487
WBGene00046566	21ur-3772	IV	14830744	14830764	1	1	0	0	0	0	0	0	0
WBGene00046567	21ur-937	IV	16612113	16612133	-1	0.00034065	-0.888502	887.327	912.703	745.83	1335.8	1426.8	1956.56
WBGene00046568	21ur-4380	IV	16192625	16192645	-1	0.0878188	-0.397541	146.946	158.731	223.749	254.893	219.267	217.632
WBGene00046569	21ur-4805	IV	15309942	15309962	1	0.000389982	1.67661	22.6071	38.213	44.1973	9.04944	13.9004	9.95704
WBGene00046570	21ur-1715	IV	13759730	13759750	-1	0.235512	-2.45368	0	1.46973	0	5.53021	4.03559	3.55609
WBGene00046571	21ur-4610	IV	16104395	16104415	1	1	0.0903586	0	0	0	0.502747	0	0.711217
WBGene00046572	21ur-4027	IV	14862211	14862231	-1	1.02815e-16	2.40999	124.339	245.445	182.314	28.1538	34.0783	44.0955
WBGene00046573	21ur-4289	IV	15898909	15898929	-1	0.250919	-1.22739	0	13.2276	2.76233	12.0659	18.8327	12.8019
WBGene00046574	21ur-266	IV	15845754	15845774	1	0.550825	2.08244	0	0	2.76233	0	0	0.711217
WBGene00046575	21ur-4086	IV	14364038	14364058	1	1.82418e-09	-1.69915	56.5176	39.6827	41.435	157.36	156.94	122.329
WBGene00046576	21ur-680	IV	16164877	16164897	1	0.210304	-0.663137	19.7812	17.6368	16.574	32.6785	27.3523	24.8926
WBGene00046577	21ur-4193	IV	16211364	16211384	1	3.1573e-05	3.39274	25.4329	13.2276	13.8117	2.01099	0.896797	2.13365
WBGene00046578	21ur-4464	IV	14503331	14503351	1	0.411866	-1.47621	0	0	5.52467	7.5412	3.13879	2.13365
WBGene00046579	21ur-4014	IV	15137220	15137240	-1	0.00730592	-1.62221	8.47764	8.81839	5.52467	24.1318	26.4555	21.3365
WBGene00046580	21ur-4244	IV	15371967	15371987	-1	0.748644	0.902	5.65176	0	0	1.00549	0.896797	0.711217
WBGene00046581	21ur-1201	IV	16357434	16357454	1	0.0479095	-1.45518	8.47764	8.81839	2.76233	18.6016	12.1068	27.7375
WBGene00046582	21ur-973	IV	14046590	14046610	1	#N/A	#N/A	0	0	0	0	0	0
WBGene00046583	21ur-2809	IV	14745714	14745734	1	1.05867e-07	-1.53788	104.558	117.578	55.2467	281.035	282.043	258.172
WBGene00046584	21ur-205	IV	14506800	14506820	-1	9.20868e-10	1.15488	726.252	655.5	814.888	310.697	280.698	394.725
WBGene00046585	21ur-1545	IV	16593501	16593521	1	8.01681e-32	2.78641	907.108	981.78	740.305	111.107	128.242	142.955
WBGene00046586	21ur-4372	IV	16016527	16016547	-1	0.391039	-0.297547	146.946	169.019	113.256	184.005	182.947	165.714
WBGene00046587	21ur-2040	IV	14561431	14561451	1	0.841394	1.20437	0	1.46973	0	1.00549	0	0
WBGene00046588	21ur-3215	IV	15537031	15537051	1	0.0877142	0.388032	1121.87	1300.71	1328.68	897.403	869.893	1102.39
WBGene00046589	21ur-2999	IV	5719805	5719825	1	3.76816e-29	3.34287	884.501	1064.09	745.83	54.2966	94.6121	118.062
WBGene00046590	21ur-1663	IV	5605864	5605884	1	0.228026	-2.32846	2.82588	0	0	5.53021	4.48399	2.13365
WBGene00046591	21ur-3157	IV	14183190	14183210	-1	1.98723e-14	3.39998	87.6023	69.0774	44.1973	4.52472	5.82918	9.24582
WBGene00046592	21ur-2525	IV	15342077	15342097	1	1.07055e-18	2.00756	183.682	208.702	154.691	45.2472	48.4271	43.3842
WBGene00046593	21ur-4443	IV	14592575	14592595	1	0.106023	0.755769	36.7365	30.8644	22.0987	16.5906	15.2456	22.0477
WBGene00046594	21ur-3902	IV	15348127	15348147	1	0.0747386	0.52184	231.722	273.37	193.363	158.365	130.932	201.986
WBGene00046595	21ur-4109	IV	6083760	6083780	1	0.893016	1.09188	0	0	0	0.502747	0	0
WBGene00046596	21ur-1412	IV	15122730	15122750	-1	6.5064e-11	-1.39177	180.856	191.065	124.305	386.612	469.922	460.869
WBGene00046597	21ur-1508	IV	15535733	15535753	1	0.0469174	3.13657	2.82588	2.93946	13.8117	1.00549	0.448399	0.711217
WBGene00046598	21ur-2555	IV	16616334	16616354	1	8.86837e-46	4.08311	712.122	886.248	665.722	42.7335	43.0463	48.3628
WBGene00046599	21ur-4015	IV	16221710	16221730	-1	0.062268	3.6394	5.65176	4.40919	2.76233	0.502747	0.448399	0
WBGene00046600	21ur-4062	IV	15916585	15916605	-1	3.73218e-35	4.74971	144.12	166.08	116.018	4.02197	6.27758	5.68974
WBGene00046601	21ur-397	IV	16831313	16831333	-1	0.248898	-0.940899	0	11.7578	5.52467	13.5742	12.5552	12.8019
WBGene00046602	21ur-2860	IV	16684683	16684703	-1	1.77919e-27	3.54093	138.468	170.489	140.879	12.5687	8.96797	18.4916
WBGene00046603	21ur-2595	IV	14819461	14819481	1	0.00025722	4.38731	11.3035	19.1065	13.8117	1.00549	0.448399	0.711217
WBGene00046604	21ur-2996	IV	5268540	5268560	-1	#N/A	#N/A	0	0	0	0	0	0
WBGene00046605	21ur-4823	IV	14817796	14817816	1	0.00439384	-1.07558	22.6071	24.9854	30.3857	60.8323	44.8399	58.3198
WBGene00046606	21ur-4329	IV	15314092	15314112	1	2.79287e-05	-1.44148	56.5176	45.5617	33.148	144.288	115.238	107.394
WBGene00046607	21ur-2944	IV	13906388	13906408	1	1.95237e-07	-1.38618	166.727	220.46	270.709	734.01	573.502	411.795
WBGene00046608	21ur-2501	IV	6130039	6130059	-1	0.962347	0.0505884	31.0847	33.8038	49.722	44.7444	33.6299	30.5823
WBGene00046609	21ur-5299	IV	16086370	16086390	-1	0.0150564	-2.58655	5.65176	1.46973	0	13.0714	13.9004	12.0907
WBGene00046610	21ur-2995	IV	14122316	14122336	-1	1.1527e-16	2.44903	113.035	92.5931	129.83	16.5906	19.2811	25.6038
WBGene00046611	21ur-2081	IV	5194049	5194069	-1	0.151925	-0.463883	110.209	146.973	160.215	232.269	192.363	152.2
WBGene00046612	21ur-3076	IV	13962739	13962759	-1	0.773028	2.02515	0	1.46973	0	0	0.448399	0
WBGene00046613	21ur-1430	IV	5566428	5566448	1	2.29156e-22	3.56698	11119.8	13359.9	7334	516.321	574.399	1595.97
WBGene00046614	21ur-4150	IV	16818302	16818322	1	0.00833961	2.19617	16.9553	7.34866	13.8117	3.51923	2.24199	2.13365
WBGene00046615	21ur-5343	IV	14658508	14658528	-1	7.89077e-26	4.09675	121.513	136.685	127.067	8.04395	11.21	2.13365
WBGene00046616	21ur-2418	IV	15583405	15583425	-1	0.462811	-0.5242	14.1294	8.81839	16.574	22.1208	16.1424	15.6468
WBGene00046617	21ur-3723	IV	14398349	14398369	-1	0.0523579	-0.911787	22.6071	19.1065	24.861	50.7774	34.9751	36.9833
WBGene00046618	21ur-3479	IV	14609436	14609456	-1	4.0923e-10	3.7667	48.04	38.213	69.0583	5.53021	4.48399	0.711217
WBGene00046619	21ur-3712	IV	15367508	15367528	-1	0.000194577	3.50877	19.7812	7.34866	16.574	1.50824	1.3452	0.711217
WBGene00046620	21ur-1691	IV	13706619	13706639	-1	8.86561e-05	-1.03827	203.463	142.564	110.493	299.134	296.84	337.828
WBGene00046621	21ur-3543	IV	14312672	14312692	1	0.011446	3.29073	5.65176	8.81839	11.0493	0.502747	1.3452	0.711217
WBGene00046622	21ur-726	IV	14458526	14458546	-1	1.52616e-15	-1.28653	373.016	329.22	353.579	824.504	789.63	952.32
WBGene00046623	21ur-3854	IV	15565137	15565157	-1	0.594976	-0.391683	8.47764	14.6973	16.574	15.5851	21.5231	15.6468
WBGene00046624	21ur-517	IV	15567476	15567496	-1	1.74603e-08	3.15453	36.7365	32.3341	30.3857	5.02747	3.13879	2.84487
WBGene00046625	21ur-728	IV	14138784	14138804	-1	2.07167e-05	2.59244	31.0847	29.3946	19.3363	3.01648	5.38078	4.97852
WBGene00046626	21ur-5397	IV	16113213	16113233	-1	0.00635579	-0.661656	203.463	180.777	143.641	258.412	268.591	310.091
WBGene00046627	21ur-2802	IV	14993066	14993086	1	0.00317598	3.55942	22.6071	11.7578	2.76233	1.00549	1.3452	0.711217
WBGene00046628	21ur-2353	IV	14482080	14482100	-1	0.636031	0.392983	22.6071	8.81839	13.8117	9.55218	11.6584	11.3795
WBGene00046629	21ur-2084	IV	14288864	14288884	1	0.501572	-0.901339	16.9553	0	2.76233	12.0659	15.694	4.97852
WBGene00046630	21ur-1825	IV	17052315	17052335	-1	0.316281	-0.470432	132.816	198.414	69.0583	120.659	189.673	253.904
WBGene00046631	21ur-515	IV	15487158	15487178	-1	9.3809e-10	2.63654	64.9953	47.0314	41.435	6.53571	9.41637	8.5346
WBGene00046632	21ur-3963	IV	16726444	16726464	-1	0.324209	0.380036	36.7365	52.9103	52.4843	40.2197	38.1139	32.0048
WBGene00046633	21ur-2487	IV	16256895	16256915	-1	0.528224	-0.239969	59.3435	88.1839	93.9193	94.0136	108.512	84.6348
WBGene00046634	21ur-1785	IV	13714108	13714128	1	0.893016	-0.394563	0	2.93946	0	2.51373	1.79359	0.711217
WBGene00046635	21ur-5016	IV	5854809	5854829	-1	0.273676	-1.76777	2.82588	0	2.76233	5.53021	4.48399	5.68974
WBGene00046636	21ur-4153	IV	4889933	4889953	-1	0.150522	-2.11885	2.82588	0	2.76233	4.02197	5.38078	10.6683
WBGene00046637	21ur-3258	IV	13833653	13833673	1	0.569735	3.53621	0	2.93946	0	0	0	0
WBGene00046638	21ur-833	IV	15296404	15296424	1	1.5196e-36	3.34608	237.374	208.702	218.224	18.6016	21.5231	25.6038
WBGene00046639	21ur-3332	IV	17161772	17161792	-1	0.066833	1.73798	5.65176	8.81839	33.148	3.01648	7.17438	3.55609
WBGene00046640	21ur-2811	IV	14028400	14028420	-1	0.0131496	2.17686	8.47764	8.81839	13.8117	2.01099	3.13879	1.42243
WBGene00046641	21ur-4906	IV	15610508	15610528	-1	0.000179387	-1.68681	16.9553	10.2881	19.3363	49.7719	43.9431	47.6515
WBGene00046642	21ur-3382	IV	14459648	14459668	1	0.00755009	-2.22115	0	4.40919	11.0493	34.1868	24.6619	11.3795
WBGene00046643	21ur-4222	IV	15592988	15593008	1	0.00902685	-2.05419	8.47764	2.93946	2.76233	24.1318	17.0391	12.8019
WBGene00046644	21ur-2216	IV	14606071	14606091	-1	0.181495	-2.47221	0	0	0	2.51373	2.24199	2.13365
WBGene00046645	21ur-3208	IV	15125779	15125799	-1	4.66034e-20	4.78455	93.2541	67.6076	60.7713	2.01099	3.13879	2.84487
WBGene00046646	21ur-508	IV	15587310	15587330	-1	4.19547e-72	3.68738	545.395	436.51	494.458	44.2417	35.8719	33.4272
WBGene00046647	21ur-1836	IV	15934779	15934799	1	1.25347e-86	4.72539	709.296	683.425	743.068	25.6401	29.1459	25.6038
WBGene00046648	21ur-3389	IV	4849314	4849334	1	1	0	0	0	0	0	0	0
WBGene00046649	21ur-2	IV	16435595	16435615	-1	1.65354e-05	1.28671	118.687	145.503	198.888	44.2417	67.7082	78.2339
WBGene00046650	21ur-1925	IV	13955566	13955586	1	0.36433	1.18119	0	7.34866	8.287	2.51373	3.13879	1.42243
WBGene00046651	21ur-2245	IV	6162942	6162962	1	1.34398e-23	2.67112	265.633	311.583	284.52	38.7115	39.9075	58.3198
WBGene00046652	21ur-187	IV	5815839	5815859	1	0.518224	-1.69795	0	0	0	1.00549	2.24199	0.711217
WBGene00046653	21ur-3546	IV	15919055	15919075	1	0.000307173	1.98137	59.3435	39.6827	16.574	11.5632	10.3132	7.11217
WBGene00046654	21ur-3780	IV	6025772	6025792	1	0.34717	-2.25519	0	0	0	4.02197	1.79359	0
WBGene00046655	21ur-182	IV	15928268	15928288	1	0.00231528	1.43958	28.2588	42.6222	30.3857	11.0604	12.5552	14.9356
WBGene00046656	21ur-1556	IV	5161675	5161695	-1	0.226257	0.49408	64.9953	47.0314	27.6233	32.1758	32.2847	34.8496
WBGene00046657	21ur-3481	IV	14554443	14554463	-1	0.202751	-0.901666	8.47764	13.2276	2.76233	14.0769	15.2456	21.3365
WBGene00046658	21ur-4771	IV	5918874	5918894	1	0.198398	-1.15912	8.47764	5.87892	0	10.0549	13.0036	9.95704
WBGene00046659	21ur-1987	IV	15834128	15834148	-1	0.00748421	-2.85129	5.65176	0	2.76233	18.6016	15.694	14.2243
WBGene00046660	21ur-5424	IV	15772780	15772800	1	1.51956e-13	3.86618	28.2588	83.7747	63.5337	5.02747	3.13879	4.2673
WBGene00046661	21ur-4494	IV	15780188	15780208	-1	0.443725	-0.817595	11.3035	2.93946	2.76233	8.54669	9.86477	9.24582
WBGene00046662	21ur-4261	IV	16135135	16135155	1	0.49964	-1.38067	0	1.46973	0	2.51373	2.24199	1.42243
WBGene00046663	21ur-885	IV	13904779	13904799	1	0.0170722	3.10008	5.65176	10.2881	5.52467	0	1.79359	0.711217
WBGene00046664	21ur-1093	IV	16604058	16604078	1	0.157128	1.83705	2.82588	8.81839	5.52467	1.50824	0.896797	2.84487
WBGene00046665	21ur-4620	IV	6066041	6066061	-1	1.44493e-18	3.83165	59.3435	72.0168	82.87	4.02197	4.93238	6.40095
WBGene00046666	21ur-4277	IV	16839036	16839056	-1	0.0766807	-0.782386	42.3882	26.4552	13.8117	39.2142	58.7402	42.673
WBGene00046667	21ur-3778	IV	17194749	17194769	-1	#N/A	#N/A	0	0	0	0	0	0
WBGene00046668	21ur-4944	IV	13714515	13714535	1	0.999479	-0.242475	0	0	0	1.00549	0.448399	0
WBGene00046669	21ur-3673	IV	14992863	14992883	1	1.23732e-10	3.9296	28.2588	51.4406	38.6727	4.52472	1.79359	1.42243
WBGene00046670	21ur-5395	IV	16607787	16607807	-1	7.56965e-21	-1.66004	146.946	127.867	118.78	386.109	407.146	447.355
WBGene00046671	21ur-3566	IV	16051924	16051944	-1	0.990233	-0.257582	0	0	0	1.00549	0.448399	0
WBGene00046672	21ur-1252	IV	15549417	15549437	-1	0.214807	-2.40631	0	0	0	1.00549	4.03559	1.42243
WBGene00046673	21ur-4099	IV	5600776	5600796	-1	0.000363229	-2.08392	5.65176	11.7578	2.76233	31.1703	32.2847	34.1384
WBGene00046674	21ur-3404	IV	17015530	17015550	-1	0.200322	3.55946	2.82588	1.46973	2.76233	0	0.448399	0
WBGene00046675	21ur-3769	IV	5113614	5113634	1	0.0753687	-3.02154	0	0	0	2.51373	4.03559	3.55609
WBGene00046676	21ur-4203	IV	15399073	15399093	-1	2.95473e-28	3.65092	132.816	151.382	209.937	17.0934	13.452	7.82339
WBGene00046677	21ur-2228	IV	16019139	16019159	1	0.566814	-1.08958	0	4.40919	0	7.03845	2.24199	2.84487
WBGene00046678	21ur-4936	IV	14692106	14692126	1	3.28022e-10	3.62104	33.9106	47.0314	52.4843	4.52472	4.48399	1.42243
WBGene00046679	21ur-1316	IV	17049689	17049709	1	0.0410652	-3.09566	2.82588	0	0	6.03296	7.62278	7.11217
WBGene00046680	21ur-57	IV	17217670	17217690	-1	0.00341571	0.96852	158.249	167.549	132.592	81.4449	77.573	76.1002
WBGene00046681	21ur-4860	IV	14038775	14038795	-1	1.15934e-05	-1.88928	16.9553	16.167	19.3363	74.4065	66.363	50.4964
WBGene00046682	21ur-2109	IV	16564215	16564235	-1	3.78286e-29	2.63026	361.713	377.721	533.13	72.3955	69.5018	62.5871
WBGene00046683	21ur-3369	IV	16178567	16178587	1	0.71193	2.10237	0	0	2.76233	0.502747	0	0
WBGene00046684	21ur-797	IV	15795112	15795132	-1	6.44722e-06	-2.60491	2.82588	8.81839	8.287	43.2362	49.7722	35.5609
WBGene00046685	21ur-2403	IV	5976934	5976954	-1	0.487604	3.82289	0	1.46973	2.76233	0	0	0
WBGene00046686	21ur-1066	IV	16669345	16669365	-1	0.00864153	-4.09727	0	0	0	10.0549	9.41637	1.42243
WBGene00046687	21ur-3049	IV	14176971	14176991	-1	3.8004e-17	3.5545	67.8212	64.6682	91.157	6.03296	8.07118	4.2673
WBGene00046688	21ur-5193	IV	16534326	16534346	-1	0.72078	-0.671432	0	1.46973	8.287	6.03296	3.58719	4.97852
WBGene00046689	21ur-4331	IV	15345677	15345697	1	1	0	0	0	0	0	0	0
WBGene00046690	21ur-256	IV	16716154	16716174	1	0.747298	-0.352144	28.2588	4.40919	2.76233	14.5797	15.694	11.3795
WBGene00046691	21ur-4654	IV	14417634	14417654	1	0.118228	1.31379	11.3035	5.87892	16.574	5.02747	3.58719	4.2673
WBGene00046692	21ur-2123	IV	14713082	14713102	1	5.1753e-10	1.39575	1025.79	1265.44	1254.1	376.557	412.527	561.15
WBGene00046693	21ur-3249	IV	15166094	15166114	1	0.123272	0.81989	42.3882	23.5157	27.6233	21.6181	17.4875	12.0907
WBGene00046694	21ur-5138	IV	14620182	14620202	1	0.488853	-1.85108	0	0	0	1.00549	2.69039	0.711217
WBGene00046695	21ur-2096	IV	15090048	15090068	1	0.00218363	-0.906358	50.8659	39.6827	52.4843	76.4175	92.3701	93.1694
WBGene00046696	21ur-964	IV	16130415	16130435	1	0.245099	1.66022	8.47764	4.40919	0	0.502747	2.69039	0.711217
WBGene00046697	21ur-3410	IV	14273943	14273963	1	0.0010913	3.85847	14.1294	8.81839	8.287	0.502747	0.896797	0.711217
WBGene00046698	21ur-328	IV	16613398	16613418	-1	0.79571	1.30315	0	2.93946	0	0.502747	0.896797	0
WBGene00046699	21ur-1396	IV	15180209	15180229	1	0.880476	0.533165	0	0	5.52467	2.01099	0	1.42243
WBGene00046700	21ur-1798	IV	16635030	16635050	1	1.33645e-12	3.68535	45.2141	45.5617	69.0583	4.52472	3.58719	4.2673
WBGene00046701	21ur-1171	IV	16747881	16747901	1	1.62907e-05	6.33597	16.9553	11.7578	19.3363	0.502747	0	0
WBGene00046702	21ur-3424	IV	16381897	16381917	1	0.000499205	2.96871	19.7812	13.2276	8.287	3.01648	1.3452	0.711217
WBGene00046703	21ur-897	IV	15351850	15351870	1	2.46991e-49	4.2276	339.106	468.844	720.969	26.1428	26.4555	29.1599
WBGene00046704	21ur-666	IV	13945623	13945643	1	0.161129	-1.27063	11.3035	4.40919	2.76233	12.5687	18.3843	11.3795
WBGene00046705	21ur-5045	IV	16540737	16540757	1	0.00516461	-1.91141	8.47764	2.93946	13.8117	34.1868	27.3523	23.4702
WBGene00046706	21ur-2940	IV	14162140	14162160	1	0.185518	-1.03837	11.3035	4.40919	8.287	14.0769	19.2811	12.0907
WBGene00046707	21ur-1948	IV	5865880	5865900	-1	0.399764	2.99299	0	1.46973	0	0	0	0
WBGene00046708	21ur-4092	IV	16691068	16691088	-1	0.039358	-0.977441	16.9553	16.167	16.574	34.6895	37.6655	24.1814
WBGene00046709	21ur-2043	IV	14287833	14287853	-1	0.00101644	-2.02358	16.9553	8.81839	8.287	61.3351	45.7367	26.315
WBGene00046710	21ur-1209	IV	15955708	15955728	-1	0.109409	-0.810551	22.6071	22.046	13.8117	39.717	42.1495	21.3365
WBGene00046711	21ur-3245	IV	15287986	15288006	1	4.66496e-28	2.87113	350.409	385.07	254.135	40.2197	44.3915	51.9188
WBGene00046712	21ur-1004	IV	6993931	6993951	-1	1	0	0	0	0	0	0	0
WBGene00046713	21ur-5197	IV	14748180	14748200	-1	0.0156729	-0.547622	163.901	235.157	160.215	308.686	254.69	269.551
WBGene00046714	21ur-3254	IV	14852554	14852574	1	0.0190221	-2.99262	2.82588	1.46973	0	12.0659	10.7616	11.3795
WBGene00046715	21ur-843	IV	17184417	17184437	1	0.382198	4.17889	2.82588	0	2.76233	0	0	0
WBGene00046716	21ur-2016	IV	16041601	16041621	-1	0.00621742	-0.75562	248.678	343.917	301.094	434.876	457.815	625.16
WBGene00046717	21ur-4785	IV	15573892	15573912	1	0.00946263	0.512338	438.012	482.072	685.059	371.53	391.9	357.742
WBGene00046718	21ur-4667	IV	15487292	15487312	-1	0.202345	-1.0836	14.1294	2.93946	5.52467	15.0824	19.2811	8.5346
WBGene00046719	21ur-3472	IV	14441919	14441939	-1	0.00149669	3.26966	16.9553	17.6368	5.52467	3.01648	0.448399	0.711217
WBGene00046720	21ur-3217	IV	17190929	17190949	1	0.46582	3.55097	0	2.93946	0	0	0	0
WBGene00046721	21ur-2513	IV	14615349	14615369	1	3.26756e-29	3.51104	200.638	230.748	168.502	15.5851	14.7972	23.4702
WBGene00046722	21ur-4914	IV	15107123	15107143	-1	2.63911e-05	3.52675	11.3035	16.167	44.1973	3.51923	2.24199	0
WBGene00046723	21ur-2531	IV	15095301	15095321	1	0.175181	-2.17857	0	2.93946	0	7.03845	8.07118	2.84487
WBGene00046724	21ur-486	IV	16888988	16889008	-1	7.40848e-05	3.09663	19.7812	17.6368	11.0493	2.01099	2.69039	0.711217
WBGene00046725	21ur-4120	IV	15987662	15987682	1	4.65227e-07	4.50286	19.7812	16.167	49.722	2.01099	0.896797	0.711217
WBGene00046726	21ur-2422	IV	13716652	13716672	1	0.310163	0.289628	96.08	110.23	91.157	82.4504	75.7794	88.9021
WBGene00046727	21ur-3375	IV	15959629	15959649	1	0.69168	0.139468	251.503	264.552	190.601	197.077	239.445	208.387
WBGene00046728	21ur-3977	IV	16635235	16635255	1	0.194487	-0.446918	141.294	107.29	80.1077	183	139.004	124.463
WBGene00046729	21ur-3629	IV	13725032	13725052	1	3.55486e-38	3.77171	627.346	686.364	519.319	38.7115	41.7011	54.7637
WBGene00046730	21ur-224	IV	5861273	5861293	1	3.3292e-05	1.3617	84.7764	73.4866	58.009	31.673	20.6263	32.716
WBGene00046731	21ur-1030	IV	14533350	14533370	1	0.657883	-0.487459	5.65176	11.7578	0	12.0659	9.86477	5.68974
WBGene00046732	21ur-4591	IV	16207023	16207043	-1	9.06375e-45	4.32279	296.718	340.978	281.758	16.5906	15.694	13.5131
WBGene00046733	21ur-372	IV	13646531	13646551	-1	0.000234989	-1.8584	14.1294	14.6973	8.287	44.7444	47.5303	46.2291
WBGene00046734	21ur-298	IV	6381765	6381785	1	0.641729	2.9866	0	1.46973	0	0	0	0
WBGene00046735	21ur-744	IV	15664507	15664527	-1	0.328155	0.25225	449.315	515.876	499.982	325.78	406.249	502.119
WBGene00046736	21ur-3465	IV	6166487	6166507	-1	0.893016	0.591927	2.82588	0	0	0.502747	0.448399	0.711217
WBGene00046737	21ur-4175	IV	4918437	4918457	1	0.00476648	5.50144	2.82588	7.34866	2.76233	0	0	0
WBGene00046738	21ur-2667	IV	15477978	15477998	1	3.96134e-10	3.19428	76.2988	33.8038	38.6727	4.52472	6.27758	4.97852
WBGene00046739	21ur-2470	IV	14044625	14044645	1	0.133093	1.55534	16.9553	5.87892	5.52467	4.52472	3.13879	1.42243
WBGene00046740	21ur-1447	IV	16052166	16052186	-1	0.00105164	0.840763	531.266	642.273	499.982	245.34	279.801	413.928
WBGene00046741	21ur-1887	IV	16818305	16818325	1	0.00833961	2.19617	16.9553	7.34866	13.8117	3.51923	2.24199	2.13365
WBGene00046742	21ur-4643	IV	14315942	14315962	1	0.091545	-1.15662	8.47764	10.2881	5.52467	21.6181	17.0391	17.7804
WBGene00046743	21ur-5271	IV	16103522	16103542	1	0.0111302	1.32428	48.04	24.9854	27.6233	12.5687	10.7616	16.358
WBGene00046744	21ur-2411	IV	13624881	13624901	1	0.211811	-2.29887	0	1.46973	0	4.02197	3.58719	4.2673
WBGene00046745	21ur-4974	IV	14104562	14104582	-1	0.284807	0.272078	1042.75	1214	1201.62	877.293	944.776	1044.78
WBGene00046746	21ur-3293	IV	16035819	16035839	1	0.343313	-1.8621	2.82588	0	0	3.51923	3.13879	2.13365
WBGene00046747	21ur-1263	IV	15271869	15271889	1	0.236954	1.11279	8.47764	5.87892	16.574	5.53021	6.27758	1.42243
WBGene00046748	21ur-5059	IV	15809339	15809359	-1	4.57287e-86	4.43769	918.411	974.432	941.956	41.728	42.5979	46.9403
WBGene00046749	21ur-3224	IV	14431402	14431422	-1	0.000119001	-1.08999	87.6023	139.624	69.0583	199.088	200.883	251.771
WBGene00046750	21ur-3604	IV	14750086	14750106	1	0.00664401	-0.919424	98.9059	85.2444	30.3857	137.753	150.214	123.041
WBGene00046751	21ur-3578	IV	13995193	13995213	1	1	0	0	0	0	0	0	0
WBGene00046752	21ur-4398	IV	15974615	15974635	-1	3.06645e-05	-1.81914	16.9553	24.9854	16.574	89.4889	67.7082	56.8974
WBGene00046753	21ur-1180	IV	5824387	5824407	-1	0.0194894	0.695792	64.9953	67.6076	80.1077	49.7719	42.5979	37.6945
WBGene00046754	21ur-3657	IV	15569086	15569106	-1	4.66954e-08	-1.27574	64.9953	70.5471	91.157	169.928	167.701	208.387
WBGene00046755	21ur-4054	IV	15623971	15623991	1	0.89778	-0.47489	2.82588	0	0	1.50824	1.79359	0
WBGene00046756	21ur-114	IV	17203490	17203510	1	0.0685088	4.12893	2.82588	4.40919	2.76233	0	0.448399	0
WBGene00046757	21ur-2882	IV	14644034	14644054	1	0.000242046	2.22846	28.2588	35.2735	33.148	8.04395	6.27758	6.40095
WBGene00046758	21ur-4748	IV	14494642	14494662	1	0.000197121	0.734609	921.237	989.129	881.184	526.376	497.274	657.876
WBGene00046759	21ur-531	IV	15334003	15334023	-1	1.2152e-08	-1.33558	104.558	142.564	88.3947	281.035	285.182	302.267
WBGene00046760	21ur-2623	IV	16536115	16536135	-1	1.63703e-10	1.51839	2515.03	2976.21	2704.32	845.62	910.698	1106.65
WBGene00046761	21ur-5282	IV	5047836	5047856	-1	3.5881e-22	3.40166	313.673	302.765	198.888	22.6236	26.4555	28.4487
WBGene00046762	21ur-1513	IV	14702666	14702686	-1	0.893016	-0.764184	0	0	0	0.502747	0.896797	0.711217
WBGene00046763	21ur-140	IV	14391426	14391446	1	0.0632118	-1.00608	8.47764	22.046	24.861	46.7554	44.3915	22.0477
WBGene00046764	21ur-126	IV	5927883	5927903	1	0.567526	0.246637	87.6023	82.3049	71.8207	53.2911	56.4982	96.0143
WBGene00046765	21ur-3337	IV	15542243	15542263	-1	0.0285309	0.704273	62.1694	70.5471	63.5337	37.706	44.3915	39.1169
WBGene00046766	21ur-1028	IV	9132124	9132144	-1	0.915245	-0.707387	0	0	0	2.01099	0	0
WBGene00046767	21ur-444	IV	15661813	15661833	1	1.27964e-15	-1.20751	330.628	399.767	395.014	860.199	883.345	867.685
WBGene00046768	21ur-1840	IV	6498732	6498752	1	1	0	0	0	0	0	0	0
WBGene00046769	21ur-3272	IV	16793446	16793466	-1	7.48806e-14	1.68305	299.543	266.021	270.709	86.4724	76.2278	98.1479
WBGene00046770	21ur-1651	IV	13906385	13906405	1	1.96564e-07	-1.3858	166.727	220.46	270.709	734.01	573.053	411.795
WBGene00046771	21ur-2361	IV	15571743	15571763	1	0.261909	-0.340246	313.673	252.794	278.996	392.645	351.545	321.47
WBGene00046772	21ur-1346	IV	14092027	14092047	-1	0.0340665	-1.35534	8.47764	11.7578	8.287	30.1648	27.8007	17.0692
WBGene00046773	21ur-453	IV	14998088	14998108	1	1.05047e-30	2.63324	819.506	1403.59	1022.06	158.868	166.356	200.563
WBGene00046774	21ur-4722	IV	16522053	16522073	1	0.466713	2.01797	2.82588	2.93946	0	0.502747	0.896797	0
WBGene00046775	21ur-2066	IV	15277255	15277275	-1	0.0670964	-1.24645	5.65176	7.34866	11.0493	23.6291	17.4875	14.9356
WBGene00046776	21ur-3653	IV	14575782	14575802	-1	0.988678	0.389125	0	0	0	0	0.896797	0
WBGene00046777	21ur-189	IV	16178841	16178861	1	0.549228	-0.860776	0	1.46973	11.0493	9.04944	8.07118	3.55609
WBGene00046778	21ur-411	IV	14429515	14429535	1	0.526598	2.61293	0	2.93946	0	0.502747	0	0
WBGene00046779	21ur-4069	IV	15881160	15881180	1	8.37452e-06	2.79635	36.7365	19.1065	19.3363	4.02197	3.58719	2.84487
WBGene00046780	21ur-5224	IV	15106948	15106968	1	0.0403703	-1.69042	5.65176	5.87892	2.76233	18.6016	14.3488	14.9356
WBGene00046781	21ur-2614	IV	14244229	14244249	-1	5.63455e-06	3.39079	14.1294	30.8644	19.3363	1.00549	3.13879	2.13365
WBGene00046782	21ur-773	IV	15318201	15318221	-1	0.126112	-0.770575	11.3035	17.6368	22.0987	34.1868	25.1103	28.4487
WBGene00046783	21ur-47	IV	14383780	14383800	-1	2.15762e-15	-1.5138	813.854	886.248	596.664	1999.42	2024.52	2558.96
WBGene00046784	21ur-3681	IV	13988049	13988069	1	0.289436	-0.292734	84.7764	89.6536	102.206	108.593	116.135	113.084
WBGene00046785	21ur-664	IV	5970039	5970059	-1	0.541405	2.08115	0	0	2.76233	0.502747	0	0
WBGene00046786	21ur-2992	IV	15240252	15240272	-1	0.0120496	4.08847	8.47764	7.34866	2.76233	0.502747	0	0.711217
WBGene00046787	21ur-611	IV	16563807	16563827	-1	0.237952	1.49446	0	4.40919	11.0493	2.01099	1.3452	2.13365
WBGene00046788	21ur-5448	IV	15662930	15662950	1	1	0.118484	0	0	0	0	0.448399	0.711217
WBGene00046789	21ur-5127	IV	15354975	15354995	-1	6.08558e-18	3.5511	70.647	74.9563	99.444	6.53571	7.17438	7.11217
WBGene00046790	21ur-2639	IV	15174576	15174596	1	9.57278e-05	-0.814333	251.503	242.506	143.641	397.673	355.58	378.367
WBGene00046791	21ur-3288	IV	16191949	16191969	-1	0.000192566	-4.95073	0	1.46973	0	29.1593	26.0071	19.2029
WBGene00046792	21ur-1265	IV	15160807	15160827	1	3.32787e-20	-1.52373	347.583	421.813	444.736	1141.23	1211.12	1147.19
WBGene00046793	21ur-479	IV	14170960	14170980	1	#N/A	#N/A	0	0	0	0	0	0
WBGene00046794	21ur-4270	IV	5872488	5872508	1	#N/A	#N/A	0	0	0	0	0	0
WBGene00046795	21ur-428	IV	16830052	16830072	1	0.563621	-0.292922	279.762	233.687	259.659	273.494	290.562	381.924
WBGene00046796	21ur-2343	IV	14474434	14474454	1	1.77411e-06	3.16506	19.7812	27.9249	38.6727	2.51373	3.58719	3.55609
WBGene00046797	21ur-889	IV	16531098	16531118	1	0.206246	2.81595	8.47764	0	2.76233	0.502747	0.896797	0
WBGene00046798	21ur-3100	IV	13961570	13961590	-1	0.00944379	2.29789	14.1294	5.87892	11.0493	2.01099	1.3452	2.84487
WBGene00046799	21ur-4740	IV	16703282	16703302	1	0.0478183	-3.51288	0	0	0	6.53571	5.38078	2.13365
WBGene00046800	21ur-2752	IV	15818283	15818303	1	0.131593	0.684889	45.2141	88.1839	30.3857	30.6675	36.7687	39.1169
WBGene00046801	21ur-5227	IV	14495919	14495939	1	1.03829e-46	2.93081	2023.33	1962.09	1991.64	271.483	241.687	270.974
WBGene00046802	21ur-4520	IV	5194537	5194557	-1	#N/A	#N/A	0	0	0	0	0	0
WBGene00046803	21ur-5302	IV	5330320	5330340	-1	#N/A	#N/A	0	0	0	0	0	0
WBGene00046804	21ur-3011	IV	5522811	5522831	1	0.0318377	3.03378	5.65176	8.81839	2.76233	0	0.896797	1.42243
WBGene00046805	21ur-2703	IV	15978206	15978226	-1	0.0361427	-2.0451	8.47764	2.93946	0	18.6016	18.8327	7.11217
WBGene00046806	21ur-526	IV	6489717	6489737	1	0.27462	-0.441008	418.23	665.788	439.211	563.076	615.203	898.267
WBGene00046807	21ur-369	IV	5481027	5481047	1	0.8732	-0.519262	0	2.93946	0	1.50824	1.3452	2.84487
WBGene00046808	21ur-4826	IV	14965714	14965734	1	4.0862e-28	3.20496	268.459	226.339	240.323	21.1154	23.3167	36.2721
WBGene00046809	21ur-306	IV	15425195	15425215	1	#N/A	#N/A	0	0	0	0	0	0
WBGene00046810	21ur-1048	IV	5757986	5758006	-1	1	0	0	0	0	0	0	0
WBGene00046811	21ur-2687	IV	16250693	16250713	-1	0.0230964	-1.46256	8.47764	13.2276	5.52467	35.695	22.8683	21.3365
WBGene00046812	21ur-4994	IV	16274867	16274887	1	0.00636651	0.618423	152.598	145.503	212.7	117.14	106.27	105.26
WBGene00046813	21ur-591	IV	15302717	15302737	1	0.0265858	-2.58041	2.82588	0	5.52467	19.6071	14.7972	6.40095
WBGene00046814	21ur-2282	IV	15542639	15542659	-1	0.893016	1.09186	0	0	0	0	0.448399	0
WBGene00046815	21ur-2662	IV	14321652	14321672	1	1.48993e-10	-1.60274	113.035	108.76	110.493	276.008	317.915	415.351
WBGene00046816	21ur-3571	IV	14132514	14132534	1	0.000377056	-2.50259	8.47764	4.40919	2.76233	28.1538	34.9751	22.0477
WBGene00046817	21ur-2192	IV	15219426	15219446	-1	3.75255e-08	-1.44669	59.3435	48.5011	58.009	146.802	143.488	154.334
WBGene00046818	21ur-1864	IV	16252791	16252811	1	0.525835	2.98923	0	1.46973	0	0	0	0
WBGene00046819	21ur-2490	IV	15279422	15279442	1	0.566541	0.686383	0	11.7578	5.52467	4.52472	2.24199	5.68974
WBGene00046820	21ur-5207	IV	15875293	15875313	1	0.00192909	-0.647908	245.852	191.065	146.404	322.763	277.559	312.224
WBGene00046821	21ur-2640	IV	16461070	16461090	-1	0.0803466	5.17923	8.47764	0	2.76233	0	0	0
WBGene00046822	21ur-4727	IV	16625590	16625610	1	1.81487e-06	1.04969	570.828	476.193	563.516	231.263	215.231	331.427
WBGene00046823	21ur-3237	IV	14638070	14638090	1	0.0542403	2.63178	11.3035	2.93946	5.52467	1.50824	1.3452	0
WBGene00046824	21ur-2423	IV	14805483	14805503	1	0.00539639	-0.882348	53.6917	45.5617	49.722	99.0411	92.3701	79.6563
WBGene00046825	21ur-1590	IV	15363959	15363979	1	3.10243e-05	-1.14059	42.3882	55.8498	63.5337	135.239	114.79	108.105
WBGene00046826	21ur-3729	IV	14433171	14433191	-1	0.642031	-0.167906	214.767	174.898	185.076	256.401	223.303	161.446
WBGene00046827	21ur-3452	IV	16794723	16794743	1	0.435909	-0.150629	469.096	504.118	444.736	567.098	516.555	495.718
WBGene00046828	21ur-578	IV	16786607	16786627	1	5.33316e-25	3.11777	135.642	108.76	132.592	14.0769	13.0036	16.358
WBGene00046829	21ur-4186	IV	5337359	5337379	-1	0.564259	-0.238199	163.901	267.491	113.256	203.612	186.534	265.284
WBGene00046830	21ur-3732	IV	15536062	15536082	1	0.0205707	-0.769552	81.9506	67.6076	107.731	172.442	142.591	115.928
WBGene00046831	21ur-1873	IV	14716806	14716826	-1	1.13647e-11	4.03088	48.04	60.259	55.2467	3.51923	3.58719	2.84487
WBGene00046832	21ur-534	IV	16005042	16005062	1	1	0	0	0	0	0	0	0
WBGene00046833	21ur-3984	IV	13646547	13646567	1	0.0468839	3.15669	0	5.87892	16.574	1.00549	1.3452	0
WBGene00046834	21ur-2702	IV	14921635	14921655	1	0.227522	2.05263	5.65176	2.93946	2.76233	1.50824	0.448399	0.711217
WBGene00046835	21ur-3169	IV	15714592	15714612	-1	0.827244	-0.698883	0	2.93946	0	2.01099	2.69039	1.42243
WBGene00046836	21ur-794	IV	15561773	15561793	-1	9.66783e-44	3.42335	268.459	314.522	397.776	37.706	26.9039	26.315
WBGene00046837	21ur-2132	IV	15392573	15392593	-1	0.97769	-0.0230179	505.833	514.406	386.727	443.925	415.666	576.086
WBGene00046838	21ur-1000	IV	14721565	14721585	-1	1.34306e-26	2.4797	794.073	781.897	544.18	127.698	121.068	132.286
WBGene00046839	21ur-3284	IV	15350531	15350551	1	0.662479	-0.653915	2.82588	4.40919	2.76233	6.53571	4.93238	4.97852
WBGene00046840	21ur-4542	IV	4956233	4956253	-1	0.893016	1.09186	0	0	0	0	0.448399	0
WBGene00046841	21ur-1860	IV	5565661	5565681	-1	1.50991e-86	3.63821	1138.83	1152.27	1127.03	90.9971	78.4698	106.683
WBGene00046842	21ur-3354	IV	14485452	14485472	1	0.796371	-0.77927	0	2.93946	0	3.01648	2.69039	0.711217
WBGene00046843	21ur-2968	IV	5440347	5440367	-1	0.297094	-1.73023	0	1.46973	2.76233	3.51923	7.62278	2.84487
WBGene00046844	21ur-2024	IV	15711614	15711634	-1	0.293785	-0.889155	14.1294	7.34866	5.52467	17.0934	16.5907	14.9356
WBGene00046845	21ur-3897	IV	15616639	15616659	-1	1.08389e-07	-0.970064	211.941	283.658	229.274	481.128	425.082	534.124
WBGene00046846	21ur-423	IV	16099705	16099725	-1	0.00148052	-1.49149	31.0847	7.34866	19.3363	60.3296	42.1495	44.8067
WBGene00046847	21ur-3887	IV	14405014	14405034	1	0.285741	-1.15067	5.65176	4.40919	2.76233	13.5742	10.3132	4.2673
WBGene00046848	21ur-68	IV	15183020	15183040	-1	2.95916e-38	3.49296	1859.43	2767.5	2347.98	194.563	195.502	230.434
WBGene00046849	21ur-273	IV	5802348	5802368	-1	1	0	0	0	0	0	0	0
WBGene00046850	21ur-3740	IV	6078416	6078436	1	2.36631e-08	-1.07781	101.732	155.792	135.354	279.527	282.94	285.198
WBGene00046851	21ur-1919	IV	16194036	16194056	-1	0.00081172	-1.34325	16.9553	22.046	24.861	51.7829	46.1851	66.1432
WBGene00046852	21ur-4705	IV	6444658	6444678	-1	2.02616e-07	3.01415	53.6917	29.3946	30.3857	7.03845	3.13879	3.55609
WBGene00046853	21ur-2934	IV	13948777	13948797	-1	0.00293122	-0.510442	2051.59	2125.23	1524.81	2550.43	2581.43	3003.47
WBGene00046854	21ur-1164	IV	15817413	15817433	-1	0.882079	-0.944285	0	0	0	1.00549	1.3452	0
WBGene00046855	21ur-2296	IV	14874511	14874531	-1	0.337047	2.02788	2.82588	1.46973	2.76233	1.00549	0	0.711217
WBGene00046856	21ur-4592	IV	14512325	14512345	1	0.00572409	5.68049	0	4.40919	11.0493	0	0	0
WBGene00046857	21ur-2680	IV	14716285	14716305	1	0.911299	0.432178	0	1.46973	2.76233	0.502747	0	2.84487
WBGene00046858	21ur-628	IV	14690413	14690433	-1	0.000110684	-1.16734	409.753	520.285	312.144	720.436	926.84	1156.44
WBGene00046859	21ur-4615	IV	13877232	13877252	-1	0.0430772	0.466377	206.289	191.065	209.937	146.299	143.039	148.644
WBGene00046860	21ur-4388	IV	16364994	16365014	1	3.52581e-18	2.86352	90.4282	121.988	116.018	13.5742	15.694	16.358
WBGene00046861	21ur-40	IV	15487971	15487991	-1	2.21735e-21	2.9058	98.9059	120.518	154.691	16.5906	15.694	17.7804
WBGene00046862	21ur-2875	IV	15362983	15363003	-1	0.23495	-0.339035	454.967	418.873	267.946	394.656	463.196	591.733
WBGene00046863	21ur-1844	IV	15396239	15396259	1	0.347357	-1.63505	0	0	5.52467	6.53571	4.93238	2.84487
WBGene00046864	21ur-5052	IV	15845751	15845771	1	0.550825	2.08244	0	0	2.76233	0	0	0.711217
WBGene00046865	21ur-999	IV	16213863	16213883	1	1.47112e-05	-1.57144	33.9106	44.0919	24.861	121.162	111.651	82.5012
WBGene00046866	21ur-1235	IV	5888787	5888807	-1	7.52483e-09	1.86358	96.08	107.29	146.404	37.706	31.8363	25.6038
WBGene00046867	21ur-408	IV	14848763	14848783	-1	1	0	0	0	0	0	0	0
WBGene00046868	21ur-3027	IV	14176647	14176667	1	2.85797e-40	3.4812	395.623	430.631	301.094	29.662	28.2491	44.8067
WBGene00046869	21ur-2938	IV	5797001	5797021	-1	0.926765	-0.705183	0	0	0	2.01099	0	0
WBGene00046870	21ur-2236	IV	5592162	5592182	-1	0.999738	-0.0597046	8.47764	1.46973	2.76233	5.53021	5.38078	0.711217
WBGene00046871	21ur-2658	IV	16884222	16884242	-1	1	0	0	0	0	0	0	0
WBGene00046872	21ur-4739	IV	15899893	15899913	1	0.105909	-1.04904	25.4329	4.40919	13.8117	40.2197	21.0747	20.6253
WBGene00046873	21ur-3952	IV	17034816	17034836	-1	0.641729	0.657565	0	8.81839	8.287	3.51923	3.13879	4.97852
WBGene00046874	21ur-3492	IV	15216338	15216358	-1	0.0260251	-2.32886	2.82588	4.40919	0	17.5961	13.9004	9.95704
WBGene00046875	21ur-103	IV	4835169	4835189	1	0.000114283	-1.27524	70.647	70.5471	80.1077	193.055	182.498	157.89
WBGene00046876	21ur-3941	IV	16077023	16077043	1	5.45185e-07	1.75104	70.647	98.472	52.4843	27.1483	18.3843	22.0477
WBGene00046877	21ur-1673	IV	14997272	14997292	-1	6.12219e-11	2.2136	67.8212	69.0774	71.8207	15.5851	13.9004	15.6468
WBGene00046878	21ur-1225	IV	16260008	16260028	-1	0.092678	0.599567	64.9953	72.0168	116.018	48.2637	69.9502	46.2291
WBGene00046879	21ur-2172	IV	14885188	14885208	1	1.23523e-49	3.39685	302.369	371.842	378.44	34.6895	32.7331	32.716
WBGene00046880	21ur-5054	IV	15267023	15267043	1	0.488884	-0.422034	22.6071	23.5157	11.0493	32.6785	26.4555	19.2029
WBGene00046881	21ur-969	IV	14048154	14048174	-1	5.01182e-07	0.899178	876.023	977.371	759.642	420.296	424.633	562.573
WBGene00046882	21ur-5234	IV	15614141	15614161	-1	0.291954	0.901403	8.47764	7.34866	13.8117	6.03296	4.93238	4.2673
WBGene00046883	21ur-1135	IV	14707515	14707535	-1	0.203699	-1.03879	5.65176	2.93946	13.8117	17.5961	12.5552	11.3795
WBGene00046884	21ur-1681	IV	14412658	14412678	-1	2.55551e-39	3.80708	686.689	1114.06	991.678	55.8049	69.0534	75.389
WBGene00046885	21ur-2292	IV	15703316	15703336	1	3.47025e-06	-1.1793	223.245	288.067	220.987	524.867	542.562	603.823
WBGene00046886	21ur-2427	IV	5600999	5601019	1	0.893016	1.09185	0	0	0	0	0.448399	0
WBGene00046887	21ur-2678	IV	14685608	14685628	1	0.374954	0.655613	8.47764	35.2735	30.3857	17.0934	21.0747	9.95704
WBGene00046888	21ur-1342	IV	13989627	13989647	1	0.000272412	-1.58154	19.7812	19.1065	11.0493	56.3076	57.8434	37.6945
WBGene00046889	21ur-215	IV	15072828	15072848	-1	0.0518844	-1.19717	16.9553	13.2276	0	24.6346	28.6975	18.4916
WBGene00046890	21ur-5250	IV	14852193	14852213	-1	#N/A	#N/A	0	0	0	0	0	0
WBGene00046891	21ur-5089	IV	16908390	16908410	1	4.35008e-13	2.55223	129.991	95.5325	74.583	18.6016	16.5907	15.6468
WBGene00046892	21ur-4249	IV	15985969	15985989	1	7.86678e-42	3.99417	293.892	335.099	464.072	23.1263	20.1779	25.6038
WBGene00046893	21ur-2160	IV	15308805	15308825	-1	0.0803739	-2.86985	2.82588	0	0	3.51923	8.51957	5.68974
WBGene00046894	21ur-2831	IV	14031540	14031560	-1	9.1477e-12	3.07779	98.9059	49.9709	69.0583	4.52472	8.07118	13.5131
WBGene00046895	21ur-4302	IV	5956169	5956189	-1	0.00151139	-0.739451	901.456	809.822	643.624	1061.8	1199.91	1673.49
WBGene00046896	21ur-870	IV	6993583	6993603	-1	0.706554	2.02709	0	1.46973	0	0	0.448399	0
WBGene00046897	21ur-2262	IV	6164139	6164159	-1	0.00100725	2.76534	16.9553	24.9854	8.287	2.01099	2.24199	3.55609
WBGene00046898	21ur-4987	IV	16014564	16014584	-1	4.27293e-07	-1.57341	39.5623	30.8644	24.861	93.5109	86.0925	103.126
WBGene00046899	21ur-1070	IV	15568697	15568717	-1	3.0039e-10	3.00005	56.5176	80.8352	35.9103	5.02747	9.86477	7.11217
WBGene00046900	21ur-235	IV	16980480	16980500	-1	0.00170973	-1.28146	73.4729	41.1525	19.3363	112.112	115.687	94.5919
WBGene00046901	21ur-3612	IV	14867071	14867091	1	0.0690373	2.26188	11.3035	4.40919	8.287	2.51373	0.896797	1.42243
WBGene00046902	21ur-1689	IV	16093040	16093060	-1	0.198215	-0.490811	115.861	91.1233	234.798	225.733	198.192	187.05
WBGene00046903	21ur-1292	IV	16617145	16617165	1	5.84491e-54	3.25774	754.51	918.582	908.808	76.4175	88.3345	106.683
WBGene00046904	21ur-3828	IV	5766033	5766053	-1	1.08188e-19	3.37958	79.1247	85.2444	104.969	11.0604	8.51957	5.68974
WBGene00046905	21ur-1397	IV	15180636	15180656	1	9.56079e-09	3.02981	62.1694	70.5471	22.0987	9.55218	5.82918	3.55609
WBGene00046906	21ur-4851	IV	13694512	13694532	-1	0.691008	0.306444	22.6071	17.6368	27.6233	19.6071	18.8327	14.9356
WBGene00046907	21ur-3868	IV	5578593	5578613	-1	0.0786625	-3.23496	0	0	0	4.52472	4.93238	2.13365
WBGene00046908	21ur-5174	IV	15126422	15126442	1	0.135428	0.541207	67.8212	49.9709	46.9597	31.1703	36.7687	44.8067
WBGene00046909	21ur-175	IV	14381738	14381758	1	1.38402e-06	3.18469	25.4329	23.5157	22.0987	2.01099	4.03559	1.42243
WBGene00046910	21ur-557	IV	14053460	14053480	-1	0.000167562	0.810076	291.066	318.932	353.579	178.978	177.566	193.451
WBGene00046911	21ur-4274	IV	14928047	14928067	1	8.05396e-37	3.65001	341.932	439.45	229.274	24.6346	25.1103	32.0048
WBGene00046912	21ur-582	IV	16040612	16040632	-1	0.248833	1.00923	5.65176	11.7578	11.0493	4.52472	4.48399	5.68974
WBGene00046913	21ur-725	IV	16789550	16789570	1	0.561413	2.00604	2.82588	0	2.76233	0	0	1.42243
WBGene00046914	21ur-821	IV	16120310	16120330	-1	0.63072	-1.19288	0	1.46973	0	3.51923	1.79359	0
WBGene00046915	21ur-2420	IV	14816894	14816914	-1	0.0372649	-2.14779	0	5.87892	0	10.0549	15.694	9.95704
WBGene00046916	21ur-1505	IV	15279790	15279810	1	0.893016	-0.631042	2.82588	0	0	1.50824	2.24199	0
WBGene00046917	21ur-4569	IV	16662196	16662216	-1	0.64333	-0.334438	22.6071	11.7578	22.0987	22.6236	28.2491	16.358
WBGene00046918	21ur-1099	IV	15679229	15679249	1	0.0447079	-1.37103	5.65176	5.87892	13.8117	19.6071	17.0391	26.315
WBGene00046919	21ur-2395	IV	14868451	14868471	-1	4.60184e-07	-2.32311	14.1294	27.9249	22.0987	110.604	116.135	105.971
WBGene00046920	21ur-603	IV	16541430	16541450	-1	0.452001	-0.239907	2404.83	2020.88	1635.3	2149.74	2054.56	2954.4
WBGene00046921	21ur-2645	IV	16789244	16789264	1	0.893016	1.09185	0	0	0	0	0	0.711217
WBGene00046922	21ur-1477	IV	14036297	14036317	-1	1.53142e-24	2.92077	146.946	157.261	179.552	23.6291	24.2135	14.9356
WBGene00046923	21ur-4292	IV	13818023	13818043	1	0.0506699	-0.757554	50.8659	70.5471	38.6727	67.368	97.7509	113.795
WBGene00046924	21ur-358	IV	14908543	14908563	-1	2.01536e-05	2.3229	28.2588	35.2735	44.1973	11.0604	7.62278	2.13365
WBGene00046925	21ur-1462	IV	16115543	16115563	1	4.9689e-05	-2.52624	5.65176	8.81839	2.76233	37.706	39.9075	31.2935
WBGene00046926	21ur-4407	IV	13873770	13873790	-1	0.0258688	1.89279	8.47764	14.6973	13.8117	3.01648	3.58719	3.55609
WBGene00046927	21ur-3260	IV	14979888	14979908	1	0.00690137	-0.592462	265.633	349.796	276.233	471.576	402.662	482.916
WBGene00046928	21ur-2154	IV	14695984	14696004	1	0.0736635	-3.25445	0	0	0	3.51923	6.72598	1.42243
WBGene00046929	21ur-4576	IV	16605152	16605172	-1	0.583411	0.465465	19.7812	7.34866	19.3363	12.5687	10.3132	8.5346
WBGene00046930	21ur-1751	IV	16196100	16196120	-1	7.34243e-13	3.39528	104.558	86.7141	52.4843	7.03845	7.17438	9.24582
WBGene00046931	21ur-3195	IV	15788295	15788315	1	3.55928e-51	3.86795	697.993	895.066	593.902	37.2032	53.3594	60.4534
WBGene00046932	21ur-2928	IV	16205483	16205503	1	2.90517e-11	3.36681	36.7365	45.5617	60.7713	3.01648	5.82918	4.97852
WBGene00046933	21ur-3607	IV	5430087	5430107	1	0.33106	-0.837514	11.3035	5.87892	5.52467	10.5577	15.694	12.8019
WBGene00046934	21ur-5178	IV	16129948	16129968	-1	0.10563	-2.98875	0	0	0	4.52472	3.13879	2.13365
WBGene00046935	21ur-3088	IV	14730360	14730380	-1	0.893016	1.09185	0	0	0	0	0.448399	0
WBGene00046936	21ur-169	IV	14177689	14177709	-1	0.0265331	-3.72226	0	0	0	8.04395	5.38078	2.84487
WBGene00046937	21ur-4751	IV	6389520	6389540	-1	0.207677	2.90288	5.65176	0	2.76233	0.502747	0.448399	0
WBGene00046938	21ur-2126	IV	16528011	16528031	-1	1	-0.0373961	14.1294	4.40919	8.287	7.03845	11.6584	6.40095
WBGene00046939	21ur-4834	IV	15743682	15743702	1	2.88585e-07	1.49514	3057.6	3174.62	2693.28	910.474	882.897	1374.78
WBGene00046940	21ur-2538	IV	15536065	15536085	1	0.0204039	-0.771197	81.9506	67.6076	107.731	172.945	142.591	115.928
WBGene00046941	21ur-3572	IV	13758483	13758503	-1	4.75336e-18	2.68422	101.732	119.048	104.969	12.5687	20.6263	17.7804
WBGene00046942	21ur-1910	IV	14982276	14982296	1	0.0155543	0.663117	206.289	204.293	124.305	112.112	86.9893	142.955
WBGene00046943	21ur-750	IV	14486519	14486539	1	0.242175	-2.62427	0	0	0	3.51923	1.3452	2.84487
WBGene00046944	21ur-1483	IV	14704386	14704406	-1	0.00396044	-1.19463	39.5623	35.2735	41.435	111.107	98.1993	53.3413
WBGene00046945	21ur-4452	IV	16006060	16006080	-1	8.5592e-05	2.85441	31.0847	13.2276	24.861	3.01648	4.48399	1.42243
WBGene00046946	21ur-2756	IV	13712624	13712644	1	0.41858	-2.09909	0	0	0	2.51373	2.69039	0
WBGene00046947	21ur-3940	IV	16026135	16026155	-1	0.250408	-0.253478	203.463	201.353	207.175	235.285	236.754	257.461
WBGene00046948	21ur-2252	IV	15604944	15604964	-1	0.000530427	-1.47154	25.4329	23.5157	19.3363	80.9422	65.4662	42.673
WBGene00046949	21ur-1102	IV	14737763	14737783	1	0.0852948	-2.44312	2.82588	1.46973	0	8.04395	9.41637	5.68974
WBGene00046950	21ur-1993	IV	5482674	5482694	1	0.641729	2.98661	0	1.46973	0	0	0	0
WBGene00046951	21ur-762	IV	6196117	6196137	1	3.11389e-40	2.44151	350.409	396.827	359.103	59.8268	71.2954	73.9666
WBGene00046952	21ur-3936	IV	16691442	16691462	1	0.665426	-1.10304	0	1.46973	0	3.01648	1.3452	0.711217
WBGene00046953	21ur-1484	IV	14886425	14886445	-1	0.928577	0.114662	14.1294	13.2276	8.287	8.54669	10.3132	14.9356
WBGene00046954	21ur-4524	IV	14565961	14565981	-1	0.177821	2.08076	2.82588	4.40919	5.52467	1.50824	1.3452	0
WBGene00046955	21ur-5105	IV	13954115	13954135	1	1.08316e-05	-0.879912	935.367	1003.83	828.7	1497.18	1581.5	2024.83
WBGene00046956	21ur-260	IV	14856368	14856388	1	0.0122152	-3.25477	0	2.93946	0	14.0769	13.452	12.0907
WBGene00046957	21ur-4680	IV	13819066	13819086	1	5.32061e-09	1.31128	319.325	255.733	301.094	128.2	124.206	97.4367
WBGene00046958	21ur-3108	IV	5784988	5785008	1	2.1598e-20	2.35493	169.553	180.777	182.314	30.6675	34.9751	39.1169
WBGene00046959	21ur-607	IV	15099164	15099184	-1	0.0341853	-0.641061	84.7764	70.5471	82.87	122.67	100.89	145.088
WBGene00046960	21ur-3816	IV	16150815	16150835	-1	0.018605	-1.33383	5.65176	10.2881	16.574	32.1758	25.5587	23.4702
WBGene00046961	21ur-1564	IV	13721461	13721481	-1	0.00635415	1.23024	36.7365	41.1525	24.861	17.5961	11.6584	15.6468
WBGene00046962	21ur-2611	IV	14412346	14412366	-1	1	0	0	0	0	0	0	0
WBGene00046963	21ur-1367	IV	16891847	16891867	-1	9.66996e-06	-1.44276	39.5623	42.6222	19.3363	108.091	86.0925	91.747
WBGene00046964	21ur-2086	IV	15625722	15625742	1	0.00166815	-1.74066	11.3035	11.7578	8.287	38.2087	39.0107	29.1599
WBGene00046965	21ur-3665	IV	14609030	14609050	1	0.0164216	2.866	8.47764	10.2881	2.76233	1.50824	1.3452	0
WBGene00046966	21ur-4063	IV	15960756	15960776	-1	1.82428e-22	4.17992	135.642	130.806	63.5337	5.02747	5.82918	7.82339
WBGene00046967	21ur-1466	IV	14227013	14227033	1	3.29844e-10	-1.84307	53.6917	80.8352	41.435	198.082	205.367	253.904
WBGene00046968	21ur-201	IV	16024537	16024557	-1	0.817815	0.516691	5.65176	0	5.52467	0.502747	3.58719	2.84487
WBGene00046969	21ur-868	IV	14662649	14662669	-1	0.0575362	2.31812	5.65176	5.87892	13.8117	2.01099	2.69039	0
WBGene00046970	21ur-1899	IV	15397446	15397466	1	0.163512	-1.12067	11.3035	4.40919	8.287	19.1044	15.2456	14.2243
WBGene00046971	21ur-452	IV	15786745	15786765	1	0.0130675	-0.49761	276.936	298.355	196.126	396.164	336.299	368.41
WBGene00046972	21ur-3094	IV	13920645	13920665	-1	0.00749415	3.04542	11.3035	2.93946	13.8117	2.01099	0.448399	0.711217
WBGene00046973	21ur-1682	IV	15613706	15613726	-1	0.484025	0.689128	11.3035	11.7578	2.76233	7.5412	5.38078	3.55609
WBGene00046974	21ur-469	IV	14571278	14571298	-1	0.0356803	-3.68217	0	0	0	8.54669	3.13879	4.2673
WBGene00046975	21ur-4501	IV	16554058	16554078	1	0.459845	-0.878453	0	5.87892	5.52467	11.5632	6.72598	4.2673
WBGene00046976	21ur-1400	IV	15422381	15422401	1	3.45519e-34	2.27045	367.365	295.416	372.915	71.39	70.3986	71.1217
WBGene00046977	21ur-698	IV	16054337	16054357	1	0.013936	-3.84944	0	0	0	5.02747	7.17438	5.68974
WBGene00046978	21ur-75	IV	14813729	14813749	1	5.51422e-52	4.25953	406.927	424.752	337.005	21.6181	20.1779	19.2029
WBGene00046979	21ur-1522	IV	14914002	14914022	-1	0.569735	-0.717837	0	1.46973	19.3363	11.5632	11.21	8.5346
WBGene00046980	21ur-1619	IV	16247111	16247131	-1	0.00561625	-1.56703	19.7812	14.6973	11.0493	57.8159	52.0142	23.4702
WBGene00046981	21ur-3003	IV	5829425	5829445	-1	0.872291	0.159019	45.2141	39.6827	19.3363	28.6566	25.5587	40.5394
WBGene00046982	21ur-5339	IV	16673604	16673624	-1	0.0897442	4.52186	2.82588	1.46973	2.76233	0	0	0
WBGene00046983	21ur-4353	IV	14887960	14887980	-1	0.0806155	2.67958	0	11.7578	5.52467	0.502747	0.448399	2.13365
WBGene00046984	21ur-3121	IV	16727323	16727343	1	0.309478	-2.20208	0	0	0	2.01099	2.24199	1.42243
WBGene00046985	21ur-1176	IV	15425349	15425369	-1	8.26993e-06	3.47412	14.1294	14.6973	46.9597	2.01099	3.58719	0.711217
WBGene00046986	21ur-2685	IV	15541081	15541101	-1	0.522558	-0.441668	14.1294	23.5157	8.287	23.1263	22.8683	20.6253
WBGene00046987	21ur-1312	IV	16550925	16550945	1	7.72301e-26	3.5921	104.558	117.578	132.592	9.55218	12.1068	7.11217
WBGene00046988	21ur-4190	IV	15777865	15777885	1	2.46204e-23	3.80463	98.9059	114.639	93.9193	7.5412	5.82918	9.24582
WBGene00046989	21ur-3349	IV	13625974	13625994	-1	0.0139369	-1.24812	16.9553	24.9854	8.287	45.7499	52.0142	28.4487
WBGene00046990	21ur-5236	IV	15976781	15976801	-1	0.0139369	-1.23881	8.47764	16.167	13.8117	32.1758	34.5267	27.7375
WBGene00046991	21ur-2787	IV	15848479	15848499	1	0.905353	0.593794	2.82588	0	0	0.502747	0.448399	0.711217
WBGene00046992	21ur-3586	IV	16555049	16555069	1	#N/A	#N/A	0	0	0	0	0	0
WBGene00046993	21ur-5144	IV	16006585	16006605	-1	8.11789e-23	3.17483	110.209	135.215	149.166	17.5961	10.3132	16.358
WBGene00046994	21ur-2977	IV	13824087	13824107	1	6.16835e-09	3.67654	42.3882	29.3946	33.148	2.51373	2.24199	3.55609
WBGene00046995	21ur-3473	IV	14486992	14487012	1	0.279656	-0.618148	16.9553	14.6973	19.3363	34.6895	17.9359	24.1814
WBGene00046996	21ur-52	IV	16902981	16903001	1	1.23474e-33	2.89534	308.021	439.45	245.848	46.2527	45.2883	43.3842
WBGene00046997	21ur-153	IV	16163472	16163492	1	4.24872e-24	3.16643	302.369	263.082	218.224	22.6236	27.8007	37.6945
WBGene00046998	21ur-4466	IV	16543448	16543468	1	1.64291e-14	3.00989	50.8659	154.322	165.74	17.0934	15.694	13.5131
WBGene00046999	21ur-2828	IV	16878859	16878879	1	0.616441	0.622004	5.65176	7.34866	5.52467	4.52472	5.38078	2.13365
WBGene00047000	21ur-5259	IV	13731968	13731988	-1	0.0105255	-2.29891	2.82588	4.40919	2.76233	19.1044	23.7651	8.5346
WBGene00047001	21ur-681	IV	14179762	14179782	1	3.20787e-12	3.87576	36.7365	38.213	52.4843	3.01648	2.24199	3.55609
WBGene00047002	21ur-1450	IV	15087584	15087604	-1	2.06597e-08	3.31705	31.0847	44.0919	27.6233	3.01648	4.48399	2.84487
WBGene00047003	21ur-988	IV	14961570	14961590	1	0.207203	3.56907	5.65176	1.46973	0	0	0.448399	0
WBGene00047004	21ur-2567	IV	6031396	6031416	-1	0.00159991	-1.00566	48.04	35.2735	55.2467	96.0246	74.8826	99.5704
WBGene00047005	21ur-571	IV	14568057	14568077	1	5.98057e-28	3.71955	135.642	126.397	209.937	12.0659	12.5552	10.6683
WBGene00047006	21ur-3783	IV	16689910	16689930	1	2.9291e-16	3.17774	90.4282	95.5325	58.009	9.55218	8.51957	9.24582
WBGene00047007	21ur-284	IV	14274094	14274114	1	1.83349e-07	-2.00967	28.2588	17.6368	13.8117	81.9477	79.815	73.2554
WBGene00047008	21ur-2358	IV	14190706	14190726	1	2.0576e-08	5.94832	56.5176	24.9854	19.3363	0.502747	0.448399	0.711217
WBGene00047009	21ur-24	IV	14306368	14306388	1	0.71881	0.277881	31.0847	16.167	22.0987	22.1208	14.7972	18.4916
WBGene00047010	21ur-3593	IV	15341421	15341441	-1	0.0497645	4.1349	2.82588	4.40919	2.76233	0	0	0.711217
WBGene00047011	21ur-4337	IV	14296454	14296474	-1	2.47765e-08	3.47427	53.6917	26.4552	30.3857	3.01648	2.69039	4.2673
WBGene00047012	21ur-5364	IV	14310457	14310477	-1	0.00588549	-1.93616	0	8.81839	8.287	22.6236	32.2847	16.358
WBGene00047013	21ur-4684	IV	17205944	17205964	1	0.131313	-0.440362	96.08	169.019	182.314	181.492	212.541	219.055
WBGene00047014	21ur-4589	IV	15256167	15256187	1	5.67496e-08	-1.05736	1540.11	1728.4	1850.76	3171.83	3411.42	4073.85
WBGene00047015	21ur-438	IV	14732559	14732579	-1	0.292329	0.768454	14.1294	17.6368	46.9597	14.0769	17.4875	13.5131
WBGene00047016	21ur-4664	IV	5712071	5712091	1	0.0419635	4.5273	5.65176	7.34866	0	0.502747	0	0
WBGene00047017	21ur-3636	IV	13886176	13886196	1	2.46328e-09	4.1007	36.7365	48.5011	24.861	1.00549	2.24199	3.55609
WBGene00047018	21ur-854	IV	16447035	16447055	1	0.961577	0.246115	0	4.40919	0	1.00549	2.69039	0.711217
WBGene00047019	21ur-2902	IV	15727963	15727983	-1	5.89189e-19	1.97367	333.454	283.658	325.955	59.8268	85.6441	94.5919
WBGene00047020	21ur-4325	IV	14709749	14709769	-1	3.74456e-08	3.64551	33.9106	22.046	55.2467	1.50824	3.13879	4.2673
WBGene00047021	21ur-108	IV	14097002	14097022	-1	6.89065e-46	2.65133	392.798	399.767	317.668	57.8159	56.9466	63.2983
WBGene00047022	21ur-4342	IV	15160544	15160564	1	0.893016	1.09185	0	0	0	0.502747	0	0
WBGene00047023	21ur-908	IV	16137301	16137321	-1	1.34624e-08	-1.22908	576.48	496.769	433.686	1091.46	1053.29	1387.58
WBGene00047024	21ur-3958	IV	6410389	6410409	1	1.29018e-34	4.01065	206.289	201.353	174.027	12.0659	12.5552	11.3795
WBGene00047025	21ur-4391	IV	14041478	14041498	-1	0.294757	-2.06777	0	1.46973	0	4.52472	2.69039	2.84487
WBGene00047026	21ur-2415	IV	14976914	14976934	-1	0.0425912	-2.0943	2.82588	2.93946	2.76233	15.5851	10.3132	10.6683
WBGene00047027	21ur-3600	IV	5838088	5838108	1	2.01566e-10	3.79366	39.5623	36.7433	33.148	3.51923	2.69039	1.42243
WBGene00047028	21ur-4825	IV	14972330	14972350	1	1	-0.00403797	5.65176	4.40919	8.287	8.04395	4.03559	5.68974
WBGene00047029	21ur-1375	IV	15684063	15684083	-1	0.00134523	-0.84731	79.1247	79.3655	96.6817	128.703	137.21	192.029
WBGene00047030	21ur-2167	IV	14092272	14092292	-1	0.833725	0.459415	0	4.40919	5.52467	3.01648	3.58719	0.711217
WBGene00047031	21ur-1039	IV	15248478	15248498	-1	0.636031	-0.573783	5.65176	5.87892	2.76233	7.5412	6.72598	7.82339
WBGene00047032	21ur-3924	IV	14695110	14695130	-1	6.8117e-05	1.67088	39.5623	36.7433	58.009	15.5851	14.7972	10.6683
WBGene00047033	21ur-5110	IV	17205987	17206007	-1	0.0654088	3.14749	11.3035	1.46973	2.76233	1.00549	0	0.711217
WBGene00047034	21ur-5279	IV	5334389	5334409	-1	0.187704	-0.55938	259.981	376.251	179.552	358.961	360.064	492.162
WBGene00047035	21ur-2591	IV	6444655	6444675	-1	2.02616e-07	3.01415	53.6917	29.3946	30.3857	7.03845	3.13879	3.55609
WBGene00047036	21ur-2578	IV	16447477	16447497	-1	0.434277	1.98327	0	0	8.287	0.502747	1.3452	0
WBGene00047037	21ur-5166	IV	15891999	15892019	1	1.88517e-05	-2.61081	14.1294	8.81839	0	54.7994	52.911	34.8496
WBGene00047038	21ur-2182	IV	6403760	6403780	-1	0.0281395	4.66545	5.65176	1.46973	8.287	0.502747	0	0
WBGene00047039	21ur-1767	IV	16038059	16038079	-1	0.532108	2.15937	0	4.40919	0	0	0.448399	0.711217
WBGene00047040	21ur-5420	IV	16634120	16634140	1	0.000486218	3.0241	8.47764	20.5762	11.0493	1.50824	2.69039	0.711217
WBGene00047041	21ur-4815	IV	14599774	14599794	1	#N/A	#N/A	0	0	0	0	0	0
WBGene00047042	21ur-3530	IV	13603904	13603924	1	0.28797	0.952302	8.47764	14.6973	8.287	3.51923	4.03559	9.95704
WBGene00047043	21ur-1043	IV	15606134	15606154	1	0.000392608	3.76314	14.1294	14.6973	13.8117	1.00549	1.3452	0.711217
WBGene00047044	21ur-4758	IV	5610789	5610809	-1	2.58212e-09	2.96698	42.3882	32.3341	44.1973	5.53021	4.48399	4.97852
WBGene00047045	21ur-196	IV	16018632	16018652	1	0.90834	-0.400563	0	2.93946	0	1.50824	2.69039	0.711217
WBGene00047046	21ur-775	IV	16820706	16820726	-1	1.47517e-05	-1.51378	28.2588	39.6827	55.2467	143.786	100.89	105.971
WBGene00047047	21ur-3067	IV	15267812	15267832	-1	0.319563	3.33211	0	2.93946	2.76233	0	0.448399	0
WBGene00047048	21ur-1608	IV	13818368	13818388	1	0.629091	-0.962176	2.82588	2.93946	0	5.02747	5.38078	1.42243
WBGene00047049	21ur-4608	IV	15426853	15426873	1	3.87385e-11	3.85444	59.3435	49.9709	46.9597	5.53021	1.79359	3.55609
WBGene00047050	21ur-1046	IV	15613539	15613559	-1	1	-0.0374643	0	4.40919	0	3.01648	2.24199	0
WBGene00047051	21ur-1319	IV	15925652	15925672	1	0.00403907	2.80745	14.1294	13.2276	8.287	3.51923	1.3452	0
WBGene00047052	21ur-2215	IV	14706785	14706805	-1	0.163557	-2.96747	0	0	0	5.53021	4.03559	0
WBGene00047053	21ur-594	IV	5821540	5821560	1	0.80881	0.0906149	175.205	116.109	127.067	130.714	123.758	132.286
WBGene00047054	21ur-4030	IV	13924307	13924327	-1	0.000132375	3.10444	36.7365	10.2881	16.574	2.01099	1.79359	3.55609
WBGene00047055	21ur-5432	IV	13998335	13998355	-1	8.55048e-06	-1.18764	1147.31	1424.17	1013.78	2350.84	2292.21	3537.59
WBGene00047056	21ur-1732	IV	15177767	15177787	-1	0.0460151	3.82162	11.3035	5.87892	0	0	0	1.42243
WBGene00047057	21ur-1244	IV	14608265	14608285	1	0.00347999	2.8546	25.4329	16.167	0	2.51373	1.79359	1.42243
WBGene00047058	21ur-5111	IV	15126994	15127014	1	0.158167	-2.64814	0	0	0	2.01099	3.58719	2.13365
WBGene00047059	21ur-4945	IV	15715031	15715051	1	0.70659	-0.997336	2.82588	0	0	1.00549	1.79359	2.13365
WBGene00047060	21ur-4182	IV	14435217	14435237	1	0.602335	1.82005	0	4.40919	0	0	1.3452	0
WBGene00047061	21ur-818	IV	6494083	6494103	1	0.746695	0.755643	0	2.93946	2.76233	1.50824	1.3452	0.711217
WBGene00047062	21ur-2774	IV	15602251	15602271	-1	0.160926	0.301271	223.245	282.188	243.085	224.728	186.085	202.697
WBGene00047063	21ur-3537	IV	16209232	16209252	1	0.0242233	-1.76517	5.65176	5.87892	8.287	30.1648	22.8683	12.8019
WBGene00047064	21ur-5019	IV	14475696	14475716	1	9.44512e-13	-1.76678	73.4729	121.988	82.87	316.228	282.043	379.079
WBGene00047065	21ur-503	IV	15068604	15068624	1	0.344662	-0.360907	186.508	208.702	116.018	180.989	198.641	283.776
WBGene00047066	21ur-3146	IV	14904903	14904923	-1	0.567829	-1.95594	0	0	0	2.51373	2.24199	0
WBGene00047067	21ur-123	IV	16474023	16474043	-1	0.957877	-0.186504	2.82588	0	5.52467	3.51923	3.13879	1.42243
WBGene00047068	21ur-808	IV	15438538	15438558	-1	0.542174	-0.529486	5.65176	17.6368	27.6233	33.684	25.5587	14.2243
WBGene00047069	21ur-1131	IV	14250926	14250946	1	1	0.0803379	0	1.46973	0	0	0.896797	1.42243
WBGene00047070	21ur-2012	IV	15701559	15701579	1	#N/A	#N/A	0	0	0	0	0	0
WBGene00047071	21ur-3973	IV	16801182	16801202	-1	3.77922e-05	-1.14661	93.2541	82.3049	60.7713	172.945	136.313	217.632
WBGene00047072	21ur-994	IV	14683633	14683653	-1	6.21874e-12	1.13493	627.346	606.999	792.79	302.151	283.388	335.694
WBGene00047073	21ur-5037	IV	17056274	17056294	1	0.296028	-1.43739	0	1.46973	5.52467	7.03845	7.62278	2.84487
WBGene00047074	21ur-2714	IV	16120735	16120755	1	4.81806e-07	-1.35067	64.9953	79.3655	69.0583	166.409	171.288	214.788
WBGene00047075	21ur-1362	IV	14183831	14183851	1	6.96331e-35	3.88637	214.767	310.113	215.462	12.0659	18.8327	19.9141
WBGene00047076	21ur-596	IV	16660139	16660159	-1	0.691451	-0.848991	0	1.46973	2.76233	5.02747	1.79359	0.711217
WBGene00047077	21ur-4670	IV	16123419	16123439	-1	0.0214082	-1.20693	5.65176	24.9854	13.8117	35.695	34.5267	42.673
WBGene00047078	21ur-1497	IV	16392892	16392912	-1	0.337134	-0.672172	2.82588	11.7578	13.8117	14.5797	15.694	17.0692
WBGene00047079	21ur-4902	IV	6190169	6190189	1	8.29852e-45	3.77292	336.28	268.961	223.749	20.6126	22.8683	16.358
WBGene00047080	21ur-3981	IV	14714440	14714460	-1	0.00198761	-0.827397	59.3435	79.3655	55.2467	104.571	116.135	134.42
WBGene00047081	21ur-4209	IV	16196421	16196441	-1	1	0.118484	0	0	0	0	0.448399	0.711217
WBGene00047082	21ur-2161	IV	13610116	13610136	-1	3.54284e-30	3.69507	178.031	213.111	176.789	10.0549	12.5552	22.7589
WBGene00047083	21ur-5196	IV	5840485	5840505	-1	0.496973	-1.51307	0	1.46973	0	1.00549	4.93238	0.711217
WBGene00047084	21ur-5028	IV	5809473	5809493	-1	6.60589e-09	2.76629	36.7365	41.1525	49.722	8.54669	4.48399	5.68974
WBGene00047085	21ur-3311	IV	14866776	14866796	1	0.227034	-0.909346	8.47764	14.6973	5.52467	16.0879	21.0747	20.6253
WBGene00047086	21ur-4536	IV	14931035	14931055	1	0.00232921	-0.90901	127.165	177.837	118.78	212.662	245.722	349.919
WBGene00047087	21ur-382	IV	16217542	16217562	-1	0.0161362	-1.4173	5.65176	17.6368	5.52467	31.1703	28.6975	27.0262
WBGene00047088	21ur-5263	IV	15503822	15503842	1	0.00228093	4.20235	8.47764	4.40919	16.574	0.502747	0.896797	0
WBGene00047089	21ur-1360	IV	15711337	15711357	-1	0.898866	0.260217	8.47764	1.46973	2.76233	4.52472	3.58719	1.42243
WBGene00047090	21ur-3447	IV	15177093	15177113	-1	0.000662842	3.36718	19.7812	11.7578	8.287	0.502747	1.3452	2.13365
WBGene00047091	21ur-1352	IV	16582437	16582457	-1	0.145127	-1.23193	8.47764	4.40919	5.52467	14.5797	15.694	10.6683
WBGene00047092	21ur-2909	IV	16801420	16801440	-1	2.52464e-49	4.17311	237.374	238.096	223.749	15.0824	14.7972	7.82339
WBGene00047093	21ur-4786	IV	14450836	14450856	1	0.932215	-0.0982346	2.82588	17.6368	30.3857	21.6181	20.6263	12.0907
WBGene00047094	21ur-3432	IV	15713344	15713364	1	0.000235746	1.83521	28.2588	26.4552	24.861	6.53571	6.27758	9.95704
WBGene00047095	21ur-2304	IV	16783103	16783123	1	0.000573276	3.92261	11.3035	8.81839	13.8117	0.502747	0.448399	1.42243
WBGene00047096	21ur-2892	IV	13840377	13840397	-1	0.0339079	-1.37721	2.82588	14.6973	8.287	20.1099	27.3523	27.0262
WBGene00047097	21ur-836	IV	16143088	16143108	1	6.67094e-06	7.25481	8.47764	10.2881	27.6233	0	0	0
WBGene00047098	21ur-1937	IV	16175842	16175862	-1	0.884981	0.748299	2.82588	1.46973	0	2.51373	0	0
WBGene00047099	21ur-2541	IV	5918050	5918070	1	0.35086	-0.455347	39.5623	22.046	30.3857	48.7664	42.1495	29.8711
WBGene00047100	21ur-4513	IV	15844269	15844289	1	0.795738	-0.414958	2.82588	2.93946	5.52467	6.53571	4.93238	2.84487
WBGene00047101	21ur-2874	IV	15140446	15140466	-1	0.242175	1.09427	14.1294	7.34866	8.287	1.00549	4.48399	8.5346
WBGene00047102	21ur-5094	IV	5735630	5735650	-1	1.0435e-09	4.02631	22.6071	49.9709	30.3857	1.00549	2.24199	3.55609
WBGene00047103	21ur-4888	IV	17228313	17228333	1	8.13246e-18	2.97987	104.558	105.821	69.0583	11.5632	12.1068	12.0907
WBGene00047104	21ur-4043	IV	14900180	14900200	1	0.809718	-0.339784	8.47764	7.34866	5.52467	13.0714	9.41637	4.2673
WBGene00047105	21ur-1118	IV	16083731	16083751	1	0.281291	-1.1019	5.65176	2.93946	5.52467	10.0549	11.6584	6.40095
WBGene00047106	21ur-3073	IV	16670183	16670203	1	0.629025	2.98705	0	1.46973	0	0	0	0
WBGene00047107	21ur-5446	IV	13898672	13898692	1	0.760628	0.688556	2.82588	7.34866	0	4.52472	2.24199	0
WBGene00047108	21ur-2117	IV	13726636	13726656	1	0.0607718	1.57411	11.3035	8.81839	19.3363	5.02747	5.38078	2.13365
WBGene00047109	21ur-564	IV	16873768	16873788	1	0.108506	2.78562	5.65176	2.93946	8.287	0	0.448399	2.13365
WBGene00047110	21ur-2598	IV	13749309	13749329	-1	0.443365	-2.04302	0	0	0	3.01648	1.3452	0.711217
WBGene00047111	21ur-2984	IV	5745366	5745386	1	4.43104e-16	3.65994	67.8212	72.0168	80.1077	5.53021	4.48399	7.82339
WBGene00047112	21ur-5325	IV	15884514	15884534	1	0.502816	1.57222	0	4.40919	2.76233	0.502747	1.3452	0.711217
WBGene00047113	21ur-1555	IV	15071971	15071991	-1	0.277274	0.473401	79.1247	74.9563	104.969	69.379	66.8114	48.3628
WBGene00047114	21ur-1204	IV	5930555	5930575	1	0.726491	0.380231	14.1294	11.7578	5.52467	13.5742	6.27758	4.2673
WBGene00047115	21ur-4794	IV	14136624	14136644	1	0.0354246	-3.63809	0	0	0	6.03296	4.48399	4.97852
WBGene00047116	21ur-3173	IV	14161969	14161989	-1	7.42926e-17	2.0064	178.031	158.731	201.65	39.717	43.4947	50.4964
WBGene00047117	21ur-20	IV	16631999	16632019	1	9.34146e-20	3.54204	81.9506	91.1233	80.1077	9.55218	5.82918	6.40095
WBGene00047118	21ur-1210	IV	14126405	14126425	-1	1.10882e-15	3.68098	56.5176	60.259	107.731	5.53021	7.17438	4.2673
WBGene00047119	21ur-3457	IV	16383213	16383233	-1	5.16573e-24	3.77113	115.861	86.7141	110.493	8.04395	8.51957	5.68974
WBGene00047120	21ur-892	IV	16015411	16015431	1	9.47296e-22	3.80348	347.583	301.295	276.233	17.0934	23.7651	25.6038
WBGene00047121	21ur-2517	IV	15358216	15358236	-1	0.637779	-0.682239	2.82588	4.40919	2.76233	8.54669	5.82918	2.13365
WBGene00047122	21ur-4144	IV	5587414	5587434	-1	0.00276323	4.55444	28.2588	10.2881	0	0.502747	0.448399	0.711217
WBGene00047123	21ur-1327	IV	16357142	16357162	1	0.567587	-0.896865	2.82588	2.93946	2.76233	7.5412	5.38078	2.84487
WBGene00047124	21ur-5008	IV	15089492	15089512	1	2.42559e-06	1.441	449.315	380.66	856.323	200.093	229.58	188.473
WBGene00047125	21ur-1871	IV	14441329	14441349	-1	6.10617e-05	-0.86302	96.08	124.927	82.87	200.093	191.018	176.382
WBGene00047126	21ur-4172	IV	14602881	14602901	1	0.636395	2.09362	0	0	2.76233	0	0.448399	0
WBGene00047127	21ur-3000	IV	16225247	16225267	1	1.30231e-07	3.5522	33.9106	20.5762	27.6233	3.01648	2.24199	1.42243
WBGene00047128	21ur-365	IV	16611465	16611485	-1	7.44519e-08	-0.9477	409.753	455.617	433.686	858.691	818.327	834.969
WBGene00047129	21ur-3282	IV	16215567	16215587	-1	8.03498e-10	2.83233	48.04	35.2735	55.2467	6.03296	7.17438	5.68974
WBGene00047130	21ur-1301	IV	14483678	14483698	-1	0.885932	0.708404	0	0	2.76233	1.00549	0.448399	0
WBGene00047131	21ur-5401	IV	16137118	16137138	1	0.0131637	-1.65732	8.47764	22.046	0	36.1978	50.2206	22.7589
WBGene00047132	21ur-1601	IV	5751017	5751037	-1	0.597733	0.534863	11.3035	10.2881	5.52467	6.03296	5.38078	7.82339
WBGene00047133	21ur-1054	IV	16220680	16220700	-1	0.842156	0.82953	0	2.93946	0	0	1.3452	0.711217
WBGene00047134	21ur-11	IV	17035805	17035825	-1	3.32522e-08	3.43903	42.3882	36.7433	22.0987	1.50824	2.69039	5.68974
WBGene00047135	21ur-3183	IV	14399897	14399917	1	0.00188275	2.35016	5.65176	19.1065	19.3363	3.01648	3.58719	2.13365
WBGene00047136	21ur-3656	IV	16798834	16798854	-1	0.188326	1.49652	2.82588	7.34866	13.8117	4.02197	2.24199	2.13365
WBGene00047137	21ur-2098	IV	15314039	15314059	1	0.000125266	3.69858	16.9553	26.4552	11.0493	2.01099	0.896797	1.42243
WBGene00047138	21ur-1770	IV	13820102	13820122	-1	0.00869435	-0.699735	84.7764	121.988	110.493	175.961	181.153	165.002
WBGene00047139	21ur-647	IV	13762729	13762749	1	0.785654	-1.05299	0	0	0	0.502747	1.3452	0.711217
WBGene00047140	21ur-3860	IV	14829889	14829909	1	0.000116202	-1.46072	31.0847	22.046	16.574	70.3845	60.9822	58.3198
WBGene00047141	21ur-2369	IV	16171215	16171235	1	0.108713	2.51677	5.65176	5.87892	2.76233	1.50824	0.896797	0
WBGene00047142	21ur-2005	IV	14587076	14587096	1	0.337075	0.375731	132.816	195.474	80.1077	94.0136	125.103	101.704
WBGene00047143	21ur-1905	IV	15974975	15974995	-1	0.99195	-0.223655	0	0	2.76233	1.50824	1.3452	0
WBGene00047144	21ur-1109	IV	16452010	16452030	1	7.75689e-05	-1.47373	19.7812	22.046	27.6233	55.3021	63.6726	73.2554
WBGene00047145	21ur-4215	IV	16600396	16600416	-1	0.848474	-0.198493	14.1294	27.9249	11.0493	20.1099	23.7651	20.6253
WBGene00047146	21ur-4133	IV	16133251	16133271	-1	1.84023e-09	2.96661	59.3435	64.6682	24.861	5.53021	6.27758	7.82339
WBGene00047147	21ur-3371	IV	14538531	14538551	1	0.893016	0.284092	0	7.34866	2.76233	3.01648	3.58719	2.84487
WBGene00047148	21ur-2930	IV	16605367	16605387	1	0.99772	0.170065	2.82588	0	0	1.50824	0	0.711217
WBGene00047149	21ur-4546	IV	15774000	15774020	-1	0.939813	-0.750129	0	0	0	0	0	2.13365
WBGene00047150	21ur-3833	IV	14027510	14027530	-1	0.368884	0.375466	36.7365	49.9709	38.6727	28.1538	36.7687	34.1384
WBGene00047151	21ur-2390	IV	13811720	13811740	1	0.00119711	3.71645	11.3035	11.7578	11.0493	0	1.79359	0.711217
WBGene00047152	21ur-2956	IV	16258620	16258640	-1	0.00927024	1.53721	31.0847	11.7578	38.6727	9.04944	10.3132	7.11217
WBGene00047153	21ur-2744	IV	14294792	14294812	-1	2.90498e-25	3.56688	129.991	167.549	121.543	11.5632	14.3488	9.24582
WBGene00047154	21ur-3648	IV	4836613	4836633	-1	0.247273	-1.96982	2.82588	1.46973	0	9.55218	4.93238	2.13365
WBGene00047155	21ur-1984	IV	14413907	14413927	-1	1.41448e-06	-1.82674	31.0847	14.6973	24.861	92.5054	75.331	66.8544
WBGene00047156	21ur-3081	IV	17157980	17158000	1	0.518865	0.242367	84.7764	72.0168	71.8207	56.8104	67.2598	68.2768
WBGene00047157	21ur-925	IV	14972386	14972406	-1	3.73844e-06	-1.05549	206.289	136.685	116.018	294.609	290.562	361.298
WBGene00047158	21ur-3515	IV	15664124	15664144	-1	7.55912e-25	3.33087	90.4282	126.397	140.879	11.0604	12.5552	12.0907
WBGene00047159	21ur-4968	IV	16368992	16369012	-1	0.988678	0.389136	0	0	0	0	0.896797	0
WBGene00047160	21ur-5314	IV	15779929	15779949	-1	0.279737	-2.59396	0	0	0	4.02197	2.69039	0.711217
WBGene00047161	21ur-3305	IV	14927231	14927251	-1	0.00120725	-1.00981	59.3435	47.0314	30.3857	89.4889	85.6441	101.704
WBGene00047162	21ur-5454	IV	14743903	14743923	-1	0.108526	-2.35763	0	1.46973	2.76233	10.0549	8.07118	3.55609
WBGene00047163	21ur-2554	IV	13954271	13954291	1	0.450104	-0.897714	5.65176	0	11.0493	11.5632	9.41637	5.68974
WBGene00047164	21ur-5275	IV	14404217	14404237	1	1.23279e-26	4.13066	186.508	149.913	93.9193	8.04395	10.3132	5.68974
WBGene00047165	21ur-1085	IV	14120833	14120853	1	0.641729	2.09484	0	0	2.76233	0	0.448399	0
WBGene00047166	21ur-376	IV	14863583	14863603	-1	0.981261	0.315116	0	0	0	0.502747	0.448399	0
WBGene00047167	21ur-3130	IV	15212192	15212212	1	0.531794	1.81241	0	4.40919	0	0.502747	0.896797	0
WBGene00047168	21ur-1598	IV	13810184	13810204	1	3.20189e-26	5.23645	144.12	121.988	74.583	1.50824	4.03559	3.55609
WBGene00047169	21ur-2158	IV	5329348	5329368	1	1	0	0	0	0	0	0	0
WBGene00047170	21ur-1761	IV	15727515	15727535	1	0.893016	0.0899121	28.2588	51.4406	27.6233	37.706	39.4591	28.4487
WBGene00047171	21ur-1369	IV	14721048	14721068	-1	0.641729	2.9866	0	1.46973	0	0	0	0
WBGene00047172	21ur-3620	IV	17032691	17032711	1	0.00875992	-3.27326	2.82588	0	2.76233	13.5742	13.0036	16.358
WBGene00047173	21ur-623	IV	6174272	6174292	1	0.0328817	-3.47893	0	0	0	5.02747	5.82918	2.84487
WBGene00047174	21ur-4801	IV	16078258	16078278	1	0.0746381	1.86124	14.1294	2.93946	13.8117	2.01099	3.13879	2.84487
WBGene00047175	21ur-4927	IV	15880204	15880224	1	1.283e-06	-3.01898	2.82588	10.2881	8.287	75.9147	67.2598	42.673
WBGene00047176	21ur-991	IV	16543828	16543848	1	1.06185e-24	3.38941	146.946	161.67	129.83	15.5851	11.21	15.6468
WBGene00047177	21ur-1704	IV	16696700	16696720	-1	0.577077	1.62812	2.82588	0	2.76233	0.502747	0.448399	0.711217
WBGene00047178	21ur-702	IV	16571635	16571655	-1	0.795811	-0.218913	14.1294	13.2276	13.8117	14.5797	17.9359	14.9356
WBGene00047179	21ur-689	IV	5284106	5284126	-1	0.180118	0.463903	121.513	74.9563	80.1077	81.4449	63.2242	51.9188
WBGene00047180	21ur-2921	IV	14757962	14757982	1	0.0123122	-1.78336	11.3035	1.46973	8.287	17.0934	22.4199	22.7589
WBGene00047181	21ur-5156	IV	16176738	16176758	-1	1.76648e-20	3.26827	169.553	183.716	93.9193	16.5906	9.86477	21.3365
WBGene00047182	21ur-4003	IV	15885074	15885094	-1	0.111469	1.15966	11.3035	17.6368	8.287	5.53021	4.48399	7.82339
WBGene00047183	21ur-3855	IV	15483813	15483833	-1	0.760597	1.27068	0	2.93946	0	1.00549	0.448399	0
WBGene00047184	21ur-1259	IV	13889092	13889112	-1	0.175827	-2.07937	2.82588	1.46973	0	8.04395	7.62278	2.13365
WBGene00047185	21ur-336	IV	16011237	16011257	-1	0.7433	-0.621782	0	4.40919	0	3.01648	2.69039	3.55609
WBGene00047186	21ur-312	IV	16122123	16122143	1	3.13093e-09	1.96711	110.209	86.7141	66.296	26.1428	21.5231	19.2029
WBGene00047187	21ur-5430	IV	5103112	5103132	1	2.56323e-05	4.13354	16.9553	17.6368	13.8117	0.502747	0.448399	2.13365
WBGene00047188	21ur-622	IV	6174615	6174635	-1	0.566814	2.08461	0	0	2.76233	0.502747	0	0
WBGene00047189	21ur-2255	IV	16601240	16601260	-1	0.895425	-0.933419	0	0	0	1.00549	1.3452	0
WBGene00047190	21ur-2710	IV	15334521	15334541	-1	0.641729	0.131459	1523.15	1325.7	1038.64	1201.06	1111.58	1237.52
WBGene00047191	21ur-615	IV	6047945	6047965	1	0.0284191	-1.13114	8.47764	11.7578	24.861	37.2032	29.1459	29.1599
WBGene00047192	21ur-1276	IV	16520746	16520766	-1	8.06916e-76	4.24946	601.913	609.938	809.364	33.684	31.3879	41.9618
WBGene00047193	21ur-1076	IV	13606514	13606534	-1	0.354175	-1.6226	5.65176	0	0	4.52472	4.93238	4.97852
WBGene00047194	21ur-4307	IV	16279147	16279167	1	0.00331318	-0.58991	211.941	282.188	245.848	386.612	345.715	393.303
WBGene00047195	21ur-5293	IV	14104281	14104301	-1	0.344662	-2.52765	0	0	0	3.01648	1.3452	2.84487
WBGene00047196	21ur-294	IV	14887062	14887082	1	0.0189843	-0.664472	169.553	117.578	135.354	189.535	203.125	270.974
WBGene00047197	21ur-5335	IV	15174994	15175014	1	0.000260663	-1.44774	33.9106	38.213	24.861	99.5438	89.6797	80.3675
WBGene00047198	21ur-1742	IV	16096595	16096615	-1	7.7763e-25	3.42828	113.035	116.109	118.78	8.54669	10.7616	13.5131
WBGene00047199	21ur-3699	IV	16042507	16042527	1	0.000993852	-2.4617	8.47764	4.40919	0	18.0989	27.3523	25.6038
WBGene00047200	21ur-5212	IV	16079841	16079861	1	0.945107	-0.207264	0	4.40919	2.76233	1.00549	4.03559	4.2673
WBGene00047201	21ur-2205	IV	15864545	15864565	1	0.00421748	-4.29561	0	0	0	10.0549	8.51957	5.68974
WBGene00047202	21ur-4714	IV	14971774	14971794	-1	3.25957e-17	2.68087	161.075	179.307	140.879	19.1044	21.9715	35.5609
WBGene00047203	21ur-228	IV	16558450	16558470	1	0.161692	0.631677	28.2588	36.7433	38.6727	21.6181	20.6263	25.6038
WBGene00047204	21ur-2371	IV	14983174	14983194	-1	0.930164	0.0722252	76.2988	55.8498	127.067	110.101	73.9858	57.6086
WBGene00047205	21ur-1749	IV	5981472	5981492	-1	0.932706	0.0846218	16.9553	38.213	71.8207	36.7005	37.2171	45.5179
WBGene00047206	21ur-2698	IV	13946067	13946087	1	3.70569e-11	-1.60972	101.732	108.76	99.444	319.747	291.459	339.962
WBGene00047207	21ur-3512	IV	16688964	16688984	1	0.636031	1.18614	2.82588	2.93946	0	1.50824	0.448399	0.711217
WBGene00047208	21ur-320	IV	14305745	14305765	-1	0.00807839	-0.748866	70.647	74.9563	74.583	130.714	139.9	98.8592
WBGene00047209	21ur-267	IV	6397494	6397514	-1	0.804276	-1.16797	0	0	0	0.502747	0.896797	1.42243
WBGene00047210	21ur-1431	IV	14686579	14686599	-1	0.776964	-1.1393	0	0	0	0	1.3452	1.42243
WBGene00047211	21ur-785	IV	14403915	14403935	1	0.000614918	-1.99727	16.9553	14.6973	2.76233	50.2747	57.395	34.1384
WBGene00047212	21ur-655	IV	16683319	16683339	1	0.102795	-1.18548	2.82588	10.2881	11.0493	22.6236	20.1779	14.2243
WBGene00047213	21ur-4233	IV	14338850	14338870	1	6.47578e-20	2.02363	989.059	1068.49	831.462	210.148	201.779	301.556
WBGene00047214	21ur-1309	IV	15990337	15990357	-1	0.939878	0.157637	8.47764	4.40919	5.52467	5.53021	2.24199	8.5346
WBGene00047215	21ur-2360	IV	15321383	15321403	1	0.746071	-0.141543	144.12	129.336	138.117	139.764	109.858	204.83
WBGene00047216	21ur-1692	IV	13761626	13761646	-1	0.0362262	1.438	16.9553	22.046	27.6233	9.04944	5.82918	9.95704
WBGene00047217	21ur-2060	IV	14977860	14977880	1	0.116948	-1.54454	2.82588	2.93946	5.52467	13.0714	11.21	7.11217
WBGene00047218	21ur-3330	IV	16356106	16356126	-1	2.94197e-19	3.8898	118.687	66.1379	63.5337	5.02747	5.82918	5.68974
WBGene00047219	21ur-5383	IV	15753829	15753849	-1	0.893016	-0.509665	0	0	2.76233	2.51373	0.896797	0
WBGene00047220	21ur-5187	IV	5861524	5861544	-1	0.073035	2.72288	2.82588	8.81839	11.0493	1.50824	1.79359	0
WBGene00047221	21ur-3216	IV	5970439	5970459	-1	0.0798899	-0.551326	56.5176	48.5011	35.9103	72.8983	62.3274	72.5441
WBGene00047222	21ur-1975	IV	16587495	16587515	-1	1.99037e-36	2.28928	469.096	604.06	480.646	99.5438	102.683	118.773
WBGene00047223	21ur-230	IV	14883005	14883025	1	1.37078e-27	3.53637	234.548	277.779	256.897	27.1483	26.0071	12.0907
WBGene00047224	21ur-496	IV	14047175	14047195	1	0.000823067	4.16379	19.7812	19.1065	0	0.502747	0.448399	1.42243
WBGene00047225	21ur-3043	IV	5969462	5969482	1	2.69558e-28	4.84303	84.7764	126.397	140.879	5.02747	3.13879	4.2673
WBGene00047226	21ur-3322	IV	14359645	14359665	-1	4.01536e-26	3.11683	113.035	121.988	129.83	12.5687	15.2456	14.2243
WBGene00047227	21ur-4482	IV	16221001	16221021	-1	0.902643	-0.729907	0	0	0	0	1.3452	0.711217
WBGene00047228	21ur-4700	IV	14292641	14292661	-1	0.0541868	-3.29308	0	0	0	5.02747	3.58719	3.55609
WBGene00047229	21ur-4421	IV	15755948	15755968	-1	0.111958	0.372024	175.205	132.276	162.978	117.643	118.377	122.329
WBGene00047230	21ur-5071	IV	15282223	15282243	1	1	0	0	0	0	0	0	0
WBGene00047231	21ur-4228	IV	13941867	13941887	1	0.763155	0.29597	14.1294	13.2276	8.287	10.5577	8.96797	9.95704
WBGene00047232	21ur-5184	IV	15768231	15768251	-1	0.0754158	0.587858	245.852	216.05	162.978	126.692	126	164.291
WBGene00047233	21ur-4118	IV	5128074	5128094	-1	0.735377	0.540639	0	2.93946	11.0493	3.51923	4.03559	1.42243
WBGene00047234	21ur-4874	IV	15566610	15566630	1	1.22617e-09	-1.18111	220.419	254.263	165.74	496.714	472.164	503.542
WBGene00047235	21ur-2295	IV	15340012	15340032	-1	0.0139536	0.677909	344.758	246.915	464.072	258.914	227.786	166.425
WBGene00047236	21ur-3882	IV	4961787	4961807	-1	9.38726e-17	3.93464	76.2988	80.8352	46.9597	2.51373	4.93238	6.40095
WBGene00047237	21ur-1040	IV	17199155	17199175	-1	#N/A	#N/A	0	0	0	0	0	0
WBGene00047238	21ur-5206	IV	16547814	16547834	1	0.00090205	3.65444	14.1294	8.81839	11.0493	1.00549	0.896797	0.711217
WBGene00047239	21ur-2261	IV	16783873	16783893	1	0.870814	-0.208361	2.82588	13.2276	13.8117	14.5797	10.7616	10.6683
WBGene00047240	21ur-4523	IV	14671877	14671897	-1	0.673955	0.277362	64.9953	36.7433	127.067	67.368	75.331	41.2506
WBGene00047241	21ur-2284	IV	16137415	16137435	-1	0.0345748	-2.10152	5.65176	1.46973	2.76233	14.5797	11.21	12.0907
WBGene00047242	21ur-109	IV	15759319	15759339	-1	1	0	0	0	0	0	0	0
WBGene00047243	21ur-3706	IV	16381019	16381039	1	4.78662e-18	4.06679	70.647	117.578	58.009	2.51373	6.27758	6.40095
WBGene00047244	21ur-2622	IV	16070775	16070795	-1	0.0405406	2.18684	5.65176	13.2276	5.52467	2.51373	2.24199	0.711217
WBGene00047245	21ur-2933	IV	6062774	6062794	-1	1.86072e-17	2.7402	141.294	174.898	146.404	14.0769	25.1103	31.2935
WBGene00047246	21ur-4090	IV	15749851	15749871	-1	0.81766	0.205277	16.9553	27.9249	13.8117	22.1208	19.2811	11.3795
WBGene00047247	21ur-2699	IV	16212391	16212411	-1	6.38196e-08	1.79274	84.7764	98.472	82.87	23.6291	28.6975	24.8926
WBGene00047248	21ur-5419	IV	14092024	14092044	-1	0.0340665	-1.35534	8.47764	11.7578	8.287	30.1648	27.8007	17.0692
WBGene00047249	21ur-2270	IV	14403788	14403808	-1	0.541881	-0.386245	28.2588	22.046	22.0987	42.7335	30.9395	19.2029
WBGene00047250	21ur-33	IV	15818597	15818617	-1	0.289597	-1.93556	0	1.46973	2.76233	10.0549	4.03559	2.13365
WBGene00047251	21ur-4284	IV	14906161	14906181	1	0.644321	-0.84458	2.82588	0	5.52467	3.51923	4.48399	4.97852
WBGene00047252	21ur-3353	IV	14054533	14054553	-1	0.00192627	2.72356	8.47764	11.7578	22.0987	3.01648	1.79359	1.42243
WBGene00047253	21ur-3232	IV	16977914	16977934	-1	2.02251e-06	-2.37349	19.7812	8.81839	5.52467	57.3131	60.9822	50.4964
WBGene00047254	21ur-1230	IV	5443633	5443653	-1	0.964027	-0.105513	2.82588	8.81839	5.52467	7.03845	5.82918	7.11217
WBGene00047255	21ur-216	IV	15806516	15806536	1	0.636031	-0.320559	25.4329	14.6973	19.3363	30.1648	20.6263	20.6253
WBGene00047256	21ur-2691	IV	14270029	14270049	-1	0.893016	1.09186	0	0	0	0	0.448399	0
WBGene00047257	21ur-1965	IV	16728285	16728305	-1	0.00885854	2.81483	2.82588	10.2881	16.574	1.00549	1.79359	1.42243
WBGene00047258	21ur-1075	IV	15706678	15706698	-1	0.469205	-0.946498	0	1.46973	11.0493	10.0549	9.41637	2.13365
WBGene00047259	21ur-3329	IV	5565484	5565504	-1	0.0100295	-1.65385	2.82588	5.87892	19.3363	32.6785	33.6299	16.358
WBGene00047260	21ur-346	IV	14490146	14490166	1	0.06048	2.78439	5.65176	4.40919	5.52467	0.502747	0.448399	1.42243
WBGene00047261	21ur-4926	IV	15403495	15403515	-1	0.0132978	1.90181	19.7812	11.7578	19.3363	6.03296	5.38078	1.42243
WBGene00047262	21ur-2078	IV	15755953	15755973	-1	0.111958	0.372024	175.205	132.276	162.978	117.643	118.377	122.329
WBGene00047263	21ur-1158	IV	15605529	15605549	1	4.29337e-05	2.41957	19.7812	27.9249	46.9597	7.5412	6.72598	2.84487
WBGene00047264	21ur-406	IV	13889751	13889771	-1	7.50491e-28	3.28816	231.722	210.172	229.274	31.673	22.8683	12.8019
WBGene00047265	21ur-1694	IV	14675220	14675240	-1	1.27069e-16	2.60553	98.9059	114.639	91.157	14.5797	14.7972	22.0477
WBGene00047266	21ur-327	IV	14982117	14982137	-1	0.337134	2.81106	2.82588	1.46973	2.76233	0	0.896797	0
WBGene00047267	21ur-2173	IV	14393939	14393959	1	4.02897e-07	-1.42102	84.7764	120.518	55.2467	258.412	217.473	244.659
WBGene00047268	21ur-1810	IV	13828448	13828468	1	0.0719463	-2.19738	0	1.46973	5.52467	12.5687	8.96797	8.5346
WBGene00047269	21ur-2559	IV	14904205	14904225	1	0.286818	-1.75841	0	2.93946	0	6.03296	4.03559	3.55609
WBGene00047270	21ur-2736	IV	17184635	17184655	-1	0.636031	-0.383754	19.7812	19.1065	8.287	20.1099	30.0427	12.0907
WBGene00047271	21ur-3225	IV	15889050	15889070	1	4.30067e-05	-2.1482	19.7812	7.34866	5.52467	51.7829	39.4591	44.8067
WBGene00047272	21ur-1217	IV	15211948	15211968	1	0.417099	-0.198447	760.162	582.014	693.346	932.092	715.644	677.79
WBGene00047273	21ur-4848	IV	15690034	15690054	1	0.435715	-0.266372	79.1247	88.1839	66.296	111.107	83.4021	90.3246
WBGene00047274	21ur-3493	IV	15884846	15884866	1	0.893016	1.09186	0	0	0	0.502747	0	0
WBGene00047275	21ur-4093	IV	16688711	16688731	1	0.00389194	-1.32063	14.1294	16.167	16.574	43.2362	41.2527	32.716
WBGene00047276	21ur-1448	IV	17035628	17035648	1	0.000565953	-2.4956	8.47764	11.7578	2.76233	53.2911	51.5658	33.4272
WBGene00047277	21ur-3218	IV	16553616	16553636	-1	0.518067	-0.792288	5.65176	8.81839	0	8.04395	11.6584	7.82339
WBGene00047278	21ur-4260	IV	6164480	6164500	1	0.893016	1.09185	0	0	0	0.502747	0	0
WBGene00047279	21ur-985	IV	15680618	15680638	1	0.344806	3.0458	2.82588	0	0	0	0	0
WBGene00047280	21ur-5216	IV	14904658	14904678	1	0.118228	-1.04444	5.65176	10.2881	16.574	25.6401	26.9039	13.5131
WBGene00047281	21ur-5334	IV	15389736	15389756	-1	0.000144235	-0.904953	192.16	199.883	212.7	368.513	353.787	410.372
WBGene00047282	21ur-1444	IV	15974097	15974117	-1	0.00514047	0.608291	901.456	1159.62	1165.7	582.683	725.509	812.21
WBGene00047283	21ur-2911	IV	17156959	17156979	1	2.68753e-11	2.93016	87.6023	66.1379	44.1973	8.54669	5.38078	12.8019
WBGene00047284	21ur-4917	IV	13728843	13728863	1	0.996379	0.273882	0	0	0	1.00549	0	0
WBGene00047285	21ur-143	IV	15655489	15655509	1	0.636031	-0.336055	33.9106	16.167	22.0987	37.706	30.9395	18.4916
WBGene00047286	21ur-2967	IV	16182013	16182033	-1	0.294757	1.87928	0	5.87892	2.76233	0.502747	1.3452	0.711217
WBGene00047287	21ur-5374	IV	14984468	14984488	1	0.000249554	-0.894326	536.917	649.621	422.637	893.883	910.698	1201.25
WBGene00047288	21ur-1243	IV	16341706	16341726	-1	0.893016	1.09186	0	0	0	0	0	0.711217
WBGene00047289	21ur-2636	IV	14967271	14967291	1	0.5069	-0.435899	11.3035	23.5157	30.3857	35.695	30.9395	22.0477
WBGene00047290	21ur-993	IV	16572843	16572863	-1	0.893016	-0.209006	11.3035	4.40919	5.52467	10.5577	6.72598	5.68974
WBGene00047291	21ur-1756	IV	15868448	15868468	1	1.05716e-14	3.3071	84.7764	77.8958	44.1973	7.03845	5.82918	8.5346
WBGene00047292	21ur-1716	IV	14242028	14242048	1	2.94715e-30	3.45622	149.772	173.428	196.126	21.1154	14.7972	10.6683
WBGene00047293	21ur-4028	IV	15544729	15544749	1	0.000152497	3.73977	16.9553	17.6368	8.287	1.50824	0.448399	1.42243
WBGene00047294	21ur-1603	IV	14567471	14567491	1	0.000651375	4.93929	14.1294	7.34866	11.0493	0	0.896797	0
WBGene00047295	21ur-4073	IV	14888216	14888236	-1	4.99454e-14	2.90711	163.901	82.3049	69.0583	12.0659	13.452	16.358
WBGene00047296	21ur-4531	IV	14748896	14748916	1	3.86754e-08	-1.31067	76.2988	76.426	49.722	181.492	154.249	175.671
WBGene00047297	21ur-3462	IV	16804366	16804386	-1	1.67601e-05	3.15631	33.9106	22.046	13.8117	3.01648	0.896797	4.2673
WBGene00047298	21ur-2064	IV	14134497	14134517	-1	0.755897	1.29667	0	0	2.76233	0.502747	0.448399	0
WBGene00047299	21ur-3652	IV	16083245	16083265	1	0.915192	-0.411192	0	1.46973	0	2.01099	0.448399	0.711217
WBGene00047300	21ur-1514	IV	15603279	15603299	1	2.39453e-11	-1.21585	158.249	163.14	146.404	387.115	361.858	342.095
WBGene00047301	21ur-3021	IV	14507530	14507550	1	0.0776064	-2.43939	0	1.46973	2.76233	11.0604	7.62278	4.2673
WBGene00047302	21ur-3390	IV	15072995	15073015	-1	#N/A	#N/A	0	0	0	0	0	0
WBGene00047303	21ur-2757	IV	14806408	14806428	1	0.824484	-0.295991	5.65176	19.1065	0	8.04395	9.41637	17.7804
WBGene00047304	21ur-3273	IV	13717736	13717756	-1	4.79578e-06	1.3375	110.209	72.0168	85.6323	30.1648	35.8719	38.4057
WBGene00047305	21ur-4774	IV	16630378	16630398	1	1.0823e-13	-1.08023	528.44	576.135	447.498	1156.82	1023.25	1122.3
WBGene00047306	21ur-286	IV	14388974	14388994	-1	3.15111e-11	2.58248	48.04	82.3049	77.3453	11.0604	10.3132	14.2243
WBGene00047307	21ur-1411	IV	5051517	5051537	1	0.0279511	2.02179	14.1294	8.81839	5.52467	3.01648	1.79359	2.13365
WBGene00047308	21ur-1268	IV	14040280	14040300	-1	0.138533	-2.52106	0	1.46973	0	4.52472	6.27758	2.84487
WBGene00047309	21ur-1183	IV	15756326	15756346	1	#N/A	#N/A	0	0	0	0	0	0
WBGene00047310	21ur-2019	IV	14850147	14850167	1	0.641729	-0.459783	11.3035	1.46973	35.9103	20.6126	27.3523	13.5131
WBGene00047311	21ur-743	IV	13646066	13646086	1	1.29224e-24	2.16649	435.186	518.815	599.426	97.5328	127.794	120.907
WBGene00047312	21ur-4445	IV	5199840	5199860	-1	2.04285e-06	3.04602	19.7812	26.4552	35.9103	2.01099	2.69039	5.68974
WBGene00047313	21ur-2601	IV	16530178	16530198	-1	1.07917e-25	2.56067	209.115	270.431	251.372	40.7225	39.4591	44.8067
WBGene00047314	21ur-483	IV	15397130	15397150	-1	8.29852e-45	4.64279	180.856	241.036	243.085	7.03845	9.86477	9.95704
WBGene00047315	21ur-835	IV	14642462	14642482	-1	0.191579	-0.921158	14.1294	4.40919	11.0493	19.6071	15.694	15.6468
WBGene00047316	21ur-1237	IV	16027064	16027084	1	1.32193e-07	-1.57782	1828.35	1829.82	1756.84	4282.4	4029.76	7855.39
WBGene00047317	21ur-3056	IV	14407546	14407566	-1	0.0051707	-1.85548	8.47764	7.34866	2.76233	25.6401	24.2135	19.2029
WBGene00047318	21ur-4723	IV	15237444	15237464	1	0.0106551	-1.66874	2.82588	11.7578	2.76233	21.6181	21.9715	22.0477
WBGene00047319	21ur-1474	IV	13946600	13946620	1	0.000300956	-1.56376	14.1294	19.1065	16.574	49.2692	42.1495	60.4534
WBGene00047320	21ur-1536	IV	16698565	16698585	-1	0.629399	-0.366854	16.9553	30.8644	13.8117	31.673	34.0783	17.0692
WBGene00047321	21ur-3418	IV	14628161	14628181	-1	0.064766	-2.58299	0	1.46973	2.76233	12.0659	10.3132	2.84487
WBGene00047322	21ur-4373	IV	16977373	16977393	1	2.88205e-74	3.90004	514.31	576.135	599.426	35.1923	33.1815	46.2291
WBGene00047323	21ur-953	IV	14975221	14975241	-1	0.854687	0.464551	2.82588	1.46973	2.76233	2.51373	0.896797	1.42243
WBGene00047324	21ur-2339	IV	16747706	16747726	-1	0.666563	-1.23742	0	0	0	1.00549	1.79359	0
WBGene00047325	21ur-2679	IV	15296717	15296737	-1	0.000525233	-1.69258	19.7812	17.6368	2.76233	36.7005	41.2527	59.031
WBGene00047326	21ur-4876	IV	17200621	17200641	-1	5.15991e-14	3.29198	127.165	179.307	132.592	9.55218	8.51957	28.4487
WBGene00047327	21ur-53	IV	16774947	16774967	1	0.953053	0.265951	5.65176	0	0	2.01099	1.3452	0.711217
WBGene00047328	21ur-3017	IV	15291167	15291187	1	0.570052	-1.1181	0	1.46973	2.76233	2.01099	3.13879	4.2673
WBGene00047329	21ur-4601	IV	16438574	16438594	-1	6.52113e-06	-1.95763	14.1294	13.2276	30.3857	73.9037	86.5409	52.6301
WBGene00047330	21ur-1112	IV	13833948	13833968	-1	0.0618045	-0.905981	25.4329	20.5762	16.574	41.728	38.1139	36.9833
WBGene00047331	21ur-2998	IV	14287105	14287125	1	3.69735e-13	2.31484	124.339	95.5325	82.87	18.6016	20.1779	22.0477
WBGene00047332	21ur-88	IV	14328832	14328852	-1	3.62434e-06	-1.14258	237.374	299.825	223.749	471.576	547.495	674.945
WBGene00047333	21ur-974	IV	15879095	15879115	-1	3.50367e-06	3.15458	39.5623	27.9249	22.0987	5.02747	2.69039	2.13365
WBGene00047334	21ur-1870	IV	15768841	15768861	1	1.41943e-08	2.34216	48.04	49.9709	82.87	13.0714	12.5552	9.24582
WBGene00047335	21ur-867	IV	15216970	15216990	-1	4.42395e-07	1.62816	166.727	255.733	165.74	48.2637	70.3986	73.9666
WBGene00047336	21ur-2993	IV	14920659	14920679	1	0.215796	2.32502	2.82588	4.40919	2.76233	1.50824	0.448399	0
WBGene00047337	21ur-3289	IV	17056010	17056030	1	4.76197e-11	2.21488	121.513	74.9563	74.583	19.6071	20.6263	17.0692
WBGene00047338	21ur-2291	IV	17158015	17158035	-1	0.00128088	-1.36782	16.9553	17.6368	13.8117	42.2307	43.9431	40.5394
WBGene00047339	21ur-3628	IV	14506799	14506819	-1	9.20868e-10	1.15488	726.252	655.5	814.888	310.697	280.698	394.725
WBGene00047340	21ur-429	IV	13732433	13732453	1	0.000193219	3.01294	22.6071	10.2881	27.6233	4.02197	2.24199	0.711217
WBGene00047341	21ur-5283	IV	15566414	15566434	1	0.000219587	-1.88759	8.47764	14.6973	13.8117	50.2747	49.3238	41.2506
WBGene00047342	21ur-3754	IV	16272794	16272814	-1	7.069e-12	4.2517	31.0847	39.6827	55.2467	1.50824	1.3452	4.2673
WBGene00047343	21ur-1181	IV	13627029	13627049	-1	0.00125029	-3.92697	2.82588	1.46973	0	27.6511	18.3843	19.2029
WBGene00047344	21ur-3285	IV	16023759	16023779	-1	0.308577	-0.840709	5.65176	5.87892	19.3363	23.1263	21.5231	7.11217
WBGene00047345	21ur-5309	IV	16176140	16176160	-1	0.978422	0.309598	0	0	0	0.502747	0.448399	0
WBGene00047346	21ur-2264	IV	16457823	16457843	-1	1.70862e-08	-1.04567	293.892	327.75	339.767	709.878	672.15	604.534
WBGene00047347	21ur-2246	IV	16115580	16115600	-1	1.45129e-57	3.96626	409.753	436.51	378.44	24.1318	30.9395	22.7589
WBGene00047348	21ur-3320	IV	16375191	16375211	-1	0.712224	-0.142328	381.494	534.982	812.126	735.518	668.562	500.697
WBGene00047349	21ur-420	IV	15061274	15061294	1	0.0775695	-0.913523	25.4329	24.9854	33.148	59.3241	62.3274	33.4272
WBGene00047350	21ur-3962	IV	5603867	5603887	-1	0.589156	-1.20709	2.82588	1.46973	0	4.52472	4.48399	0.711217
WBGene00047351	21ur-2310	IV	15408444	15408464	-1	0.92664	-0.637759	0	0	0	1.00549	0.896797	0
WBGene00047352	21ur-3805	IV	17166436	17166456	-1	2.81564e-08	-1.3999	90.4282	66.1379	46.9597	172.442	162.769	200.563
WBGene00047353	21ur-1879	IV	14016931	14016951	-1	0.398121	-1.93106	0	0	0	1.50824	1.79359	1.42243
WBGene00047354	21ur-478	IV	16273671	16273691	-1	0.326631	1.4382	5.65176	4.40919	5.52467	1.00549	3.13879	1.42243
WBGene00047355	21ur-886	IV	5518665	5518685	-1	1.03732e-05	-0.945934	138.468	135.215	121.543	234.28	228.683	302.267
WBGene00047356	21ur-4472	IV	15608923	15608943	1	5.27569e-09	-1.40529	336.28	282.188	218.224	600.279	648.833	969.389
WBGene00047357	21ur-665	IV	5422742	5422762	-1	0.0881864	-1.66441	2.82588	4.40919	2.76233	12.0659	10.7616	10.6683
WBGene00047358	21ur-1739	IV	14853439	14853459	1	6.78774e-09	2.72332	48.04	67.6076	71.8207	5.02747	9.86477	14.2243
WBGene00047359	21ur-2635	IV	14869442	14869462	-1	4.11477e-19	2.43635	124.339	120.518	179.552	28.1538	25.1103	24.1814
WBGene00047360	21ur-2332	IV	16598681	16598701	1	3.71012e-16	1.68973	2102.46	1851.86	1693.31	508.277	540.32	703.394
WBGene00047361	21ur-4145	IV	15717048	15717068	1	1.27178e-08	1.3483	618.868	546.74	417.112	195.568	180.256	247.504
WBGene00047362	21ur-124	IV	15097953	15097973	1	1.07329e-08	-1.58537	39.5623	49.9709	71.8207	182.497	158.285	138.687
WBGene00047363	21ur-1347	IV	5214660	5214680	1	0.344435	-1.01672	5.65176	5.87892	2.76233	10.5577	13.9004	4.97852
WBGene00047364	21ur-4975	IV	4985802	4985822	-1	0.487941	-1.18368	2.82588	0	5.52467	7.5412	8.51957	0
WBGene00047365	21ur-3724	IV	16216656	16216676	1	1.36035e-15	3.3671	79.1247	58.7892	63.5337	7.03845	5.38078	7.11217
WBGene00047366	21ur-3168	IV	16773735	16773755	1	0.81624	0.161819	59.3435	55.8498	16.574	37.2032	34.0783	49.7852
WBGene00047367	21ur-928	IV	14649446	14649466	1	0.00357529	-0.763471	421.056	411.525	278.996	570.617	545.253	778.071
WBGene00047368	21ur-4726	IV	16104755	16104775	-1	0.993187	0.331783	0	0	0	0.502747	0.448399	0
WBGene00047369	21ur-4191	IV	14515432	14515452	-1	0.988678	0.26442	0	0	0	1.00549	0	0
WBGene00047370	21ur-3368	IV	6498286	6498306	1	0.000538086	4.405	14.1294	11.7578	8.287	0.502747	0.448399	0.711217
WBGene00047371	21ur-1927	IV	15956448	15956468	-1	0.0416593	2.70996	0	8.81839	13.8117	0.502747	0.448399	2.84487
WBGene00047372	21ur-4650	IV	4969308	4969328	1	0.0273559	-1.36259	11.3035	14.6973	0	21.6181	23.7651	29.1599
WBGene00047373	21ur-246	IV	15758556	15758576	1	1.03284e-19	2.57152	1229.26	918.582	690.583	133.228	136.313	209.098
WBGene00047374	21ur-1223	IV	15247907	15247927	-1	1	-0.037925	0	1.46973	0	1.00549	1.3452	0
WBGene00047375	21ur-4202	IV	16606772	16606792	1	0.122834	-2.9668	0	0	0	3.01648	4.48399	2.13365
WBGene00047376	21ur-1065	IV	14972050	14972070	-1	0.233619	-0.537197	45.2141	38.213	16.574	48.7664	40.3559	59.031
WBGene00047377	21ur-3405	IV	6021565	6021585	1	0.229178	-0.37027	118.687	161.67	149.166	180.486	162.32	218.344
WBGene00047378	21ur-2481	IV	5079651	5079671	-1	0.000446772	1.23299	59.3435	70.5471	38.6727	21.6181	25.1103	27.0262
WBGene00047379	21ur-465	IV	14011090	14011110	1	1.0699e-06	2.10342	64.9953	70.5471	55.2467	15.0824	13.452	16.358
WBGene00047380	21ur-539	IV	14355456	14355476	1	#N/A	#N/A	0	0	0	0	0	0
WBGene00047381	21ur-2041	IV	15898597	15898617	-1	0.674586	-0.900236	2.82588	0	2.76233	2.51373	4.03559	2.13365
WBGene00047382	21ur-254	IV	6131197	6131217	-1	0.000707394	-1.06811	36.7365	48.5011	33.148	87.9806	90.1281	77.5227
WBGene00047383	21ur-4493	IV	16616602	16616622	1	6.59938e-07	2.61057	31.0847	33.8038	38.6727	5.53021	6.27758	4.97852
WBGene00047384	21ur-2790	IV	15337843	15337863	-1	2.32395e-52	3.24882	562.35	580.544	499.982	54.2966	51.1174	68.988
WBGene00047385	21ur-2111	IV	14680336	14680356	1	6.68384e-16	3.46062	59.3435	67.6076	77.3453	7.5412	5.82918	4.97852
WBGene00047386	21ur-1855	IV	4843081	4843101	-1	0.893016	1.09186	0	0	0	0	0.448399	0
WBGene00047387	21ur-1943	IV	14572574	14572594	1	2.71813e-18	1.62824	299.543	246.915	254.135	84.9642	83.4021	89.6133
WBGene00047388	21ur-2404	IV	5714189	5714209	1	0.254165	-0.367079	59.3435	66.1379	69.0583	78.9312	74.4342	99.5704
WBGene00047389	21ur-4324	IV	15690402	15690422	1	1.67074e-25	2.20305	528.44	574.665	477.884	93.5109	110.754	141.532
WBGene00047390	21ur-2959	IV	16532473	16532493	-1	0.463368	-0.832108	2.82588	2.93946	8.287	11.5632	8.07118	3.55609
WBGene00047391	21ur-1902	IV	14266262	14266282	1	0.277274	0.465255	53.6917	86.7141	69.0583	41.2252	45.2883	68.988
WBGene00047392	21ur-5402	IV	5497739	5497759	1	5.78147e-28	3.64153	517.136	664.318	698.87	37.2032	52.911	61.1647
WBGene00047393	21ur-3318	IV	6496145	6496165	1	1.80154e-07	3.80939	31.0847	23.5157	27.6233	4.02197	0.896797	0.711217
WBGene00047394	21ur-255	IV	6131753	6131773	1	0.893016	1.09186	0	0	0	0	0.448399	0
WBGene00047395	21ur-3348	IV	16190285	16190305	1	5.00594e-12	3.86145	48.04	35.2735	55.2467	5.02747	3.13879	0.711217
WBGene00047396	21ur-525	IV	5514405	5514425	1	0.0610181	0.724429	53.6917	55.8498	33.148	25.1373	26.0071	37.6945
WBGene00047397	21ur-3733	IV	13629642	13629662	-1	2.1541e-16	-2.51457	45.2141	24.9854	13.8117	163.895	143.936	162.157
WBGene00047398	21ur-2766	IV	13995662	13995682	1	0.804857	-0.762721	0	1.46973	0	0.502747	0.896797	2.84487
WBGene00047399	21ur-3672	IV	15272925	15272945	-1	0.000346202	2.89515	1042.75	213.111	1367.36	107.085	99.5445	145.799
WBGene00047400	21ur-4952	IV	16246907	16246927	-1	0.511784	-1.45045	0	1.46973	0	2.01099	1.79359	2.84487
WBGene00047401	21ur-1911	IV	16105130	16105150	-1	0.000526066	-1.31592	22.6071	23.5157	27.6233	52.7884	61.879	68.2768
WBGene00047402	21ur-4242	IV	15064994	15065014	-1	1.51863e-05	-1.43269	45.2141	32.3341	16.574	81.4449	80.7118	93.1694
WBGene00047403	21ur-4111	IV	16619747	16619767	-1	1	-0.00391416	36.7365	38.213	38.6727	40.7225	39.4591	33.4272
WBGene00047404	21ur-3579	IV	16705054	16705074	1	0.712499	0.724987	8.47764	2.93946	0	1.50824	1.79359	3.55609
WBGene00047405	21ur-639	IV	13959123	13959143	1	0.865743	-0.975637	0	0	0	1.50824	0.896797	0
WBGene00047406	21ur-4593	IV	15093741	15093761	1	0.943919	0.308025	0	2.93946	0	0.502747	1.79359	0.711217
WBGene00047407	21ur-2830	IV	14355243	14355263	-1	0.804857	-0.181872	33.9106	33.8038	44.1973	62.8433	35.4235	27.0262
WBGene00047408	21ur-4016	IV	14539451	14539471	1	5.53634e-16	3.96186	67.8212	57.3195	46.9597	4.02197	4.48399	2.13365
WBGene00047409	21ur-2451	IV	14757099	14757119	1	1	0	0	0	0	0	0	0
WBGene00047410	21ur-3710	IV	16715797	16715817	1	0.638637	-0.407842	11.3035	5.87892	13.8117	12.5687	13.0036	12.8019
WBGene00047411	21ur-1124	IV	15569423	15569443	-1	0.000155462	-0.956694	169.553	173.428	102.206	259.417	273.075	342.095
WBGene00047412	21ur-695	IV	16558238	16558258	1	0.00624573	5.62572	5.65176	1.46973	8.287	0	0	0
WBGene00047413	21ur-4267	IV	13632908	13632928	1	0.0125043	2.35106	8.47764	14.6973	8.287	2.01099	2.24199	2.13365
WBGene00047414	21ur-4479	IV	14924883	14924903	1	0.446995	2.6376	0	2.93946	0	0	0	0.711217
WBGene00047415	21ur-3204	IV	13639937	13639957	-1	0.000342448	-1.78539	14.1294	11.7578	8.287	42.7335	40.3559	34.8496
WBGene00047416	21ur-2042	IV	14008217	14008237	1	3.20569e-06	2.16371	64.9953	38.213	38.6727	10.5577	9.41637	11.3795
WBGene00047417	21ur-3356	IV	14149060	14149080	-1	1.20173e-08	3.26867	28.2588	38.213	44.1973	5.02747	4.03559	2.13365
WBGene00047418	21ur-160	IV	14692398	14692418	-1	7.06617e-10	-1.56106	98.9059	82.3049	85.6323	248.357	217.473	317.203
WBGene00047419	21ur-4390	IV	16149734	16149754	1	0.0318644	-2.42341	2.82588	0	5.52467	18.0989	10.3132	7.82339
WBGene00047420	21ur-3251	IV	17051947	17051967	1	0.209574	0.712687	53.6917	20.5762	55.2467	32.1758	27.8007	15.6468
WBGene00047421	21ur-3248	IV	15117048	15117068	1	0.044172	-3.12564	2.82588	0	0	11.0604	3.13879	7.11217
WBGene00047422	21ur-5192	IV	14970752	14970772	1	0.585977	-0.705254	2.82588	13.2276	0	10.5577	11.21	8.5346
WBGene00047423	21ur-3411	IV	5777190	5777210	-1	0.00166152	-1.83238	2.82588	13.2276	13.8117	45.2472	38.5623	27.7375
WBGene00047424	21ur-2208	IV	15575844	15575864	-1	0.221489	2.01608	5.65176	5.87892	0	1.00549	1.79359	0
WBGene00047425	21ur-3034	IV	15239983	15240003	-1	0.866941	0.73049	2.82588	0	0	0.502747	0.896797	0
WBGene00047426	21ur-2328	IV	13899128	13899148	-1	0.848977	-1.31896	0	0	0	1.00549	0	2.13365
WBGene00047427	21ur-3744	IV	14030822	14030842	-1	1	0.0565584	0	0	0	0.502747	0	0.711217
WBGene00047428	21ur-5046	IV	15055571	15055591	-1	0.636031	3.06977	2.82588	0	0	0	0	0
WBGene00047429	21ur-1797	IV	14394498	14394518	-1	0.893016	-0.0967875	98.9059	88.1839	49.722	66.8653	104.028	83.9236
WBGene00047430	21ur-181	IV	13983432	13983452	1	1	0	0	0	0	0	0	0
WBGene00047431	21ur-1170	IV	17019021	17019041	1	1.98351e-39	3.60099	457.793	476.193	350.816	35.1923	29.1459	42.673
WBGene00047432	21ur-2655	IV	14544895	14544915	-1	0.993187	0.331757	0	0	0	0.502747	0.448399	0
WBGene00047433	21ur-3567	IV	5876806	5876826	1	0.732086	-1.17353	2.82588	0	0	3.01648	1.79359	0.711217
WBGene00047434	21ur-2807	IV	15104858	15104878	-1	1	0	0	0	0	0	0	0
WBGene00047435	21ur-2976	IV	14239631	14239651	1	0.120547	-0.67477	25.4329	45.5617	16.574	48.7664	40.3559	61.1647
WBGene00047436	21ur-936	IV	14220194	14220214	1	0.211844	3.24187	0	0	11.0493	0	0.448399	0.711217
WBGene00047437	21ur-1299	IV	14702301	14702321	1	0.0287975	1.60657	28.2588	8.81839	11.0493	4.52472	6.72598	3.55609
WBGene00047438	21ur-2589	IV	13704775	13704795	-1	1.00587e-11	2.29741	141.294	114.639	102.206	15.5851	26.4555	31.2935
WBGene00047439	21ur-387	IV	16802116	16802136	1	7.02127e-28	4.65049	152.598	139.624	110.493	5.53021	4.93238	5.68974
WBGene00047440	21ur-468	IV	14312259	14312279	-1	0.000152693	-1.19997	45.2141	48.5011	46.9597	124.681	109.409	89.6133
WBGene00047441	21ur-2592	IV	16047459	16047479	1	2.75677e-92	4.73631	3181.94	3320.12	3521.98	110.101	127.794	138.687
WBGene00047442	21ur-3244	IV	14940483	14940503	1	0.000487177	-0.840994	237.374	198.414	146.404	333.824	357.822	352.052
WBGene00047443	21ur-3829	IV	15890587	15890607	1	0.0352495	-3.17574	0	0	2.76233	7.03845	10.3132	4.2673
WBGene00047444	21ur-3953	IV	5105590	5105610	-1	1	0	0	0	0	0	0	0
WBGene00047445	21ur-1336	IV	6390377	6390397	1	9.75528e-13	3.40446	33.9106	63.1984	63.5337	4.02197	6.27758	4.97852
WBGene00047446	21ur-2780	IV	16911760	16911780	1	2.51147e-05	-0.883735	169.553	160.201	151.928	278.019	294.598	316.492
WBGene00047447	21ur-471	IV	15569637	15569657	-1	4.78417e-37	2.66859	276.936	289.537	265.184	52.2856	39.9075	38.4057
WBGene00047448	21ur-4646	IV	6164919	6164939	1	1.87556e-09	3.82151	39.5623	42.6222	27.6233	1.00549	4.48399	2.13365
WBGene00047449	21ur-413	IV	15698781	15698801	1	4.66612e-07	1.70457	50.8659	88.1839	121.543	26.6456	29.5943	23.4702
WBGene00047450	21ur-3773	IV	15582979	15582999	1	0.345323	-0.814329	16.9553	4.40919	16.574	26.6456	26.4555	8.5346
WBGene00047451	21ur-4108	IV	14179283	14179303	1	5.02533e-08	-1.32394	183.682	188.126	132.592	374.043	374.413	524.878
WBGene00047452	21ur-3738	IV	14939384	14939404	1	3.86077e-57	4.09757	296.718	377.721	320.431	20.6126	17.4875	20.6253
WBGene00047453	21ur-802	IV	14857042	14857062	1	0.848203	0.0897602	73.4729	77.8958	88.3947	74.9092	71.2954	78.9451
WBGene00047454	21ur-4671	IV	14809271	14809291	1	0.000128347	-1.08985	67.8212	48.5011	66.296	131.72	118.826	128.73
WBGene00047455	21ur-3386	IV	6057117	6057137	-1	1	0.0692646	2.82588	0	2.76233	2.51373	1.79359	0
WBGene00047456	21ur-1721	IV	15597170	15597190	1	1	0.028999	2.82588	2.93946	0	3.51923	0.448399	2.13365
WBGene00047457	21ur-961	IV	14398613	14398633	-1	1.12617e-07	3.67237	28.2588	26.4552	27.6233	3.01648	1.3452	2.13365
WBGene00047458	21ur-3026	IV	5795426	5795446	1	7.90118e-06	-1.42066	36.7365	39.6827	22.0987	85.9697	96.8541	88.9021
WBGene00047459	21ur-2465	IV	14582841	14582861	-1	0.869112	0.735079	0	0	2.76233	0.502747	0.896797	0
WBGene00047460	21ur-4467	IV	14338847	14338867	1	6.47578e-20	2.02363	989.059	1068.49	831.462	210.148	201.779	301.556
WBGene00047461	21ur-1665	IV	15054811	15054831	-1	0.168709	-0.700893	14.1294	16.167	24.861	31.1703	21.5231	36.2721
WBGene00047462	21ur-2795	IV	17225880	17225900	1	0.425693	-1.09072	5.65176	2.93946	0	8.04395	5.82918	4.2673
WBGene00047463	21ur-4614	IV	14931491	14931511	-1	0.00851646	-0.73327	45.2141	70.5471	71.8207	91.4999	104.477	122.329
WBGene00047464	21ur-4383	IV	16186121	16186141	1	1	-0.00125519	0	0	5.52467	3.01648	0.448399	1.42243
WBGene00047465	21ur-1956	IV	14749615	14749635	-1	7.54668e-05	-1.40256	31.0847	17.6368	38.6727	68.3735	75.331	73.2554
WBGene00047466	21ur-1676	IV	13750862	13750882	-1	1.4606e-06	-1.09371	647.127	654.03	527.606	1164.86	1170.77	1574.63
WBGene00047467	21ur-2426	IV	5528804	5528824	-1	4.1718e-40	3.76196	197.812	273.37	259.659	19.6071	17.9359	16.358
WBGene00047468	21ur-29	IV	13925921	13925941	1	0.773028	2.10799	2.82588	0	0	0.502747	0	0
WBGene00047469	21ur-5292	IV	14560449	14560469	1	0.906214	-0.40498	2.82588	0	2.76233	1.50824	4.93238	0
WBGene00047470	21ur-4435	IV	14363369	14363389	-1	3.45259e-09	-1.20422	152.598	152.852	91.157	276.511	318.363	333.561
WBGene00047471	21ur-990	IV	14743675	14743695	1	0.52338	0.791196	2.82588	11.7578	11.0493	8.54669	3.13879	3.55609
WBGene00047472	21ur-3129	IV	13946211	13946231	1	1.55028e-08	-1.39238	104.558	76.426	110.493	283.549	246.171	218.344
WBGene00047473	21ur-135	IV	15777129	15777149	1	0.865144	-0.647658	0	0	2.76233	1.00549	2.69039	0
WBGene00047474	21ur-4101	IV	13692200	13692220	1	0.000357017	2.09132	31.0847	16.167	38.6727	4.02197	5.38078	10.6683
WBGene00047475	21ur-4440	IV	16178838	16178858	1	0.549228	-0.860776	0	1.46973	11.0493	9.04944	8.07118	3.55609
WBGene00047476	21ur-1644	IV	14378439	14378459	-1	0.0561028	1.02021	16.9553	35.2735	13.8117	10.0549	12.1068	12.8019
WBGene00047477	21ur-4314	IV	14124072	14124092	-1	3.74215e-38	3.04397	3444.75	3123.18	2635.27	294.609	328.228	495.007
WBGene00047478	21ur-69	IV	15902148	15902168	-1	0.893016	1.09185	0	0	0	0	0.448399	0
WBGene00047479	21ur-4123	IV	16993915	16993935	-1	#N/A	#N/A	0	0	0	0	0	0
WBGene00047480	21ur-2514	IV	16698976	16698996	-1	1.08253e-35	3.69494	197.812	199.883	149.166	12.5687	13.9004	16.358
WBGene00047481	21ur-1924	IV	15602022	15602042	-1	0.037333	-0.706226	45.2141	47.0314	82.87	105.074	90.1281	84.6348
WBGene00047482	21ur-4152	IV	4886776	4886796	1	1.0426e-32	2.85663	180.856	198.414	190.601	27.6511	23.3167	28.4487
WBGene00047483	21ur-1370	IV	16986835	16986855	1	1.56096e-05	5.07491	8.47764	14.6973	30.3857	1.00549	0.448399	0
WBGene00047484	21ur-3711	IV	16187999	16188019	-1	5.80664e-13	3.78848	64.9953	42.6222	60.7713	2.51373	6.27758	2.84487
WBGene00047485	21ur-3445	IV	16716455	16716475	1	0.893016	0.790091	0	2.93946	0	0	1.3452	0.711217
WBGene00047486	21ur-4802	IV	14401748	14401768	1	0.0900205	-2.43426	2.82588	1.46973	0	11.0604	7.62278	4.2673
WBGene00047487	21ur-913	IV	15387749	15387769	-1	4.62462e-21	-1.9164	228.896	194.005	129.83	694.293	606.683	793.718
WBGene00047488	21ur-5449	IV	15858875	15858895	-1	0.198326	-2.6981	0	0	0	2.51373	4.03559	1.42243
WBGene00047489	21ur-2493	IV	14730357	14730377	-1	0.893016	1.09185	0	0	0	0	0.448399	0
WBGene00047490	21ur-3688	IV	14457400	14457420	-1	1.5344e-05	1.73263	42.3882	49.9709	33.148	10.5577	13.9004	14.2243
WBGene00047491	21ur-5396	IV	16148140	16148160	-1	3.58105e-11	2.59435	98.9059	79.3655	96.6817	21.1154	14.7972	8.5346
WBGene00047492	21ur-772	IV	16112080	16112100	-1	0.788336	0.241558	22.6071	16.167	30.3857	18.6016	26.9039	10.6683
WBGene00047493	21ur-2146	IV	14565446	14565466	-1	1.38099e-07	2.78965	31.0847	30.8644	80.1077	8.04395	6.27758	5.68974
WBGene00047494	21ur-433	IV	16590138	16590158	-1	0.944838	0.256413	2.82588	2.93946	0	1.50824	0.896797	2.84487
WBGene00047495	21ur-78	IV	16614150	16614170	1	4.51367e-24	5.04259	93.2541	133.746	104.969	3.51923	3.13879	3.55609
WBGene00047496	21ur-3664	IV	15817624	15817644	-1	0.907829	0.251667	5.65176	1.46973	5.52467	4.52472	1.79359	3.55609
WBGene00047497	21ur-4053	IV	16089311	16089331	-1	0.893016	0.717998	0	1.46973	0	0.502747	0.896797	0
WBGene00047498	21ur-1090	IV	15346784	15346804	1	1.47605e-05	-1.43537	124.339	91.1233	35.9103	191.546	205.815	286.62
WBGene00047499	21ur-3762	IV	14913878	14913898	-1	0.300051	2.17977	5.65176	1.46973	2.76233	0	1.3452	0.711217
WBGene00047500	21ur-4510	IV	15701663	15701683	1	0.87092	-0.0973136	412.579	473.253	502.745	444.428	418.356	624.449
WBGene00047501	21ur-751	IV	6023954	6023974	1	0.157835	-0.755092	39.5623	27.9249	13.8117	35.695	43.9431	58.3198
WBGene00047502	21ur-2650	IV	5495645	5495665	1	0.383223	-0.466303	31.0847	32.3341	5.52467	30.6675	32.7331	36.9833
WBGene00047503	21ur-3906	IV	16725283	16725303	1	0.00573759	-1.50624	16.9553	4.40919	30.3857	58.3186	40.8043	33.4272
WBGene00047504	21ur-1824	IV	4960014	4960034	-1	5.10502e-05	5.47846	16.9553	20.5762	8.287	0.502747	0.448399	0
WBGene00047505	21ur-4000	IV	16475766	16475786	-1	3.28966e-22	2.5908	124.339	121.988	121.543	19.1044	22.4199	19.2029
WBGene00047506	21ur-850	IV	15412161	15412181	1	0.00334915	-0.757464	859.068	845.095	627.05	1118.61	1273.9	1554.01
WBGene00047507	21ur-125	IV	17158376	17158396	1	0.0119637	3.08791	19.7812	7.34866	0	1.00549	1.3452	0.711217
WBGene00047508	21ur-1253	IV	14662131	14662151	-1	0.819652	-0.480379	2.82588	1.46973	2.76233	3.51923	2.24199	3.55609
WBGene00047509	21ur-542	IV	6044470	6044490	1	0.349624	1.06867	2.82588	5.87892	16.574	1.50824	7.17438	2.84487
WBGene00047510	21ur-2800	IV	17235436	17235456	-1	0.191759	1.68214	5.65176	2.93946	5.52467	2.01099	1.3452	0.711217
WBGene00047511	21ur-518	IV	14265312	14265332	1	1.2229e-06	-0.925973	370.19	293.946	328.718	686.752	602.199	585.332
WBGene00047512	21ur-2253	IV	14039457	14039477	1	0.277342	-2.37324	0	0	0	2.01099	3.58719	0.711217
WBGene00047513	21ur-1884	IV	15758263	15758283	1	0.585977	-0.17644	259.981	251.324	143.641	258.914	226.441	261.017
WBGene00047514	21ur-1589	IV	16166988	16167008	-1	0.000290459	-1.02823	64.9953	58.7892	44.1973	112.615	109.409	123.041
WBGene00047515	21ur-1786	IV	13711413	13711433	1	1.13802e-12	3.6266	39.5623	41.1525	44.1973	4.02197	3.13879	2.84487
WBGene00047516	21ur-4743	IV	15135100	15135120	1	1.24179e-15	3.30297	90.4282	102.881	157.453	17.5961	10.7616	6.40095
WBGene00047517	21ur-575	IV	15225453	15225473	1	0.000169995	-0.806938	96.08	107.29	121.543	175.459	179.359	214.788
[truncated: 12,715 more rows]
