# Supplementary material for: SNPC-1.3 is a sex-specific transcription factor that drives male piRNA expression in C. elegans
Source: eLife. 2021 Feb 15;10:e60681. doi: 10.7554/eLife.60681 (PMC7884074; doi:10.7554/eLife.60681)
Supplement: Supplementary file 2. — Related to Figure 3. [file elife-60681-supp2.xlsx]

## Sheet: snpc-1.3(-)48h_vs_WT48h
gene ID	gene name	chromosome	gene start	gene end	strand	adj. pvalue (BH)	log2(fold change)	WT 48h replicate 1	WT 48h replicate 2	WT 48h replicate 3	snpc-1.3(-) 48h replicate 1	snpc-1.3(-) 48h replicate 2
WBGene00045518	21ur-5153	IV	5723096	5723116	-1	0.101662	-3.74057	2.82588	5.87892	2.76233	0	0
WBGene00045519	21ur-4348	IV	15836817	15836837	1	0.514374	0.935907	5.65176	4.40919	2.76233	11.1462	6.03809
WBGene00045520	21ur-3279	IV	15576143	15576163	1	1	0	0	0	0	0	0
WBGene00045521	21ur-4491	IV	16545939	16545959	1	0.00207847	-3.54287	19.7812	33.8038	35.9103	6.68774	0
WBGene00045522	21ur-1293	IV	14284757	14284777	-1	0.459071	1.5642	0	1.46973	2.76233	6.68774	2.41524
WBGene00045523	21ur-4900	IV	15101897	15101917	-1	0.233684	-2.86507	8.47764	5.87892	2.76233	0	1.20762
WBGene00045524	21ur-2872	IV	15745804	15745824	1	0.0345347	0.749031	48.04	49.9709	60.7713	86.9406	89.3637
WBGene00045525	21ur-4886	IV	14087254	14087274	-1	6.0997e-10	-9.00614	536.917	401.237	298.332	0	1.20762
WBGene00045526	21ur-3726	IV	14006014	14006034	1	0.347005	0.778855	8.47764	7.34866	13.8117	13.3755	18.1143
WBGene00045527	21ur-3449	IV	15955239	15955259	-1	1	-0.0276528	0	1.46973	0	0	1.20762
WBGene00045528	21ur-4318	IV	5914546	5914566	-1	0.914588	0.756751	0	1.46973	0	0	2.41524
WBGene00045529	21ur-3987	IV	13689238	13689258	-1	1.5324e-06	-1.41163	1333.82	1503.53	1903.25	510.497	673.851
WBGene00045530	21ur-770	IV	16391830	16391850	-1	2.64733e-44	-8.32744	2164.63	2905.66	2414.28	6.68774	8.45333
WBGene00045531	21ur-3262	IV	15774176	15774196	1	0.399615	-1.22446	2.82588	13.2276	19.3363	2.22925	7.24571
WBGene00045532	21ur-116	IV	5101205	5101225	-1	0.340565	-2.63328	0	4.40919	0	0	0
WBGene00045533	21ur-338	IV	16887155	16887175	-1	3.40374e-05	-1.41352	158.249	149.913	110.493	60.1896	47.0971
WBGene00045534	21ur-248	IV	17172196	17172216	-1	5.19631e-08	-4.70458	110.209	82.3049	55.2467	4.45849	2.41524
WBGene00045535	21ur-2337	IV	14055385	14055405	-1	0.683778	0.79784	0	1.46973	8.287	2.22925	7.24571
WBGene00045536	21ur-2148	IV	14561149	14561169	1	0.583029	-2.2449	2.82588	1.46973	0	0	0
WBGene00045537	21ur-3280	IV	5759813	5759833	1	0.892113	-0.0821799	155.423	173.428	185.076	138.213	181.143
WBGene00045538	21ur-783	IV	16661836	16661856	1	8.58736e-07	-1.62482	316.499	407.116	287.283	91.3991	125.592
WBGene00045539	21ur-2502	IV	15396845	15396865	1	5.31871e-06	1.13152	271.285	223.399	174.027	532.79	446.819
WBGene00045540	21ur-2533	IV	14259503	14259523	1	1.13618e-10	-6.20903	203.463	176.368	132.592	0	3.62285
WBGene00045541	21ur-2515	IV	16346305	16346325	-1	1	0.0081049	8.47764	13.2276	8.287	13.3755	8.45333
WBGene00045542	21ur-194	IV	16062799	16062819	-1	0.195296	-0.45499	681.037	605.529	392.251	363.367	451.649
WBGene00045543	21ur-1754	IV	13631496	13631516	1	0.914588	-1.39197	0	1.46973	0	0	0
WBGene00045544	21ur-3162	IV	6188675	6188695	1	0.74344	-0.258632	42.3882	57.3195	38.6727	46.8142	33.8133
WBGene00045545	21ur-4859	IV	15298501	15298521	1	0.00114017	-5.27145	22.6071	26.4552	44.1973	0	1.20762
WBGene00045546	21ur-3313	IV	16807628	16807648	-1	0.0124291	-4.29891	11.3035	16.167	19.3363	0	1.20762
WBGene00045547	21ur-2522	IV	5899411	5899431	-1	0.000203983	-2.64033	56.5176	38.213	35.9103	4.45849	8.45333
WBGene00045548	21ur-2768	IV	16717897	16717917	1	0.00636675	-4.58167	25.4329	11.7578	22.0987	0	1.20762
WBGene00045549	21ur-4660	IV	6992052	6992072	-1	#N/A	#N/A	0	0	0	0	0
WBGene00045550	21ur-380	IV	16891832	16891852	1	0.643387	1.51353	2.82588	0	0	2.22925	2.41524
WBGene00045551	21ur-127	IV	15583334	15583354	1	#N/A	#N/A	0	0	0	0	0
WBGene00045552	21ur-3009	IV	13839715	13839735	-1	1.87675e-05	1.18555	87.6023	85.2444	102.206	242.988	176.312
WBGene00045553	21ur-4396	IV	14151064	14151084	1	1.26592e-07	1.53439	169.553	155.792	113.256	372.284	474.594
WBGene00045554	21ur-3929	IV	15605848	15605868	1	0.00156504	0.920336	104.558	121.988	113.256	185.027	242.731
WBGene00045555	21ur-4158	IV	16203925	16203945	-1	1	0	0	0	0	0	0
WBGene00045556	21ur-972	IV	15630784	15630804	1	0.221992	2.60747	0	0	0	4.45849	1.20762
WBGene00045557	21ur-4509	IV	15655850	15655870	-1	0.379562	-1.33659	2.82588	16.167	2.76233	4.45849	2.41524
WBGene00045558	21ur-4358	IV	13726773	13726793	-1	0.434761	0.367811	42.3882	44.0919	52.4843	64.6481	55.5504
WBGene00045559	21ur-4032	IV	17151826	17151846	-1	0.00259825	0.942553	1172.74	1447.69	1022.06	1999.63	2671.25
WBGene00045560	21ur-3396	IV	14509444	14509464	-1	0.901202	-0.204085	22.6071	19.1065	22.0987	20.0632	16.9067
WBGene00045561	21ur-4184	IV	14159840	14159860	-1	0.5591	1.54297	0	1.46973	0	2.22925	2.41524
WBGene00045562	21ur-231	IV	15907905	15907925	-1	0.114134	-3.91992	2.82588	2.93946	8.287	0	0
WBGene00045563	21ur-4606	IV	16898307	16898327	1	0.0828228	0.496502	146.946	141.094	138.117	247.446	160.613
WBGene00045564	21ur-4026	IV	14432370	14432390	1	8.37418e-09	-6.54873	129.991	160.201	149.166	2.22925	1.20762
WBGene00045565	21ur-1557	IV	14342516	14342536	1	0.572789	-2.23554	0	1.46973	2.76233	0	0
WBGene00045566	21ur-4925	IV	16984283	16984303	1	0.0184782	-4.86704	11.3035	11.7578	2.76233	0	0
WBGene00045567	21ur-4269	IV	15777866	15777886	1	5.74386e-10	-4.41977	98.9059	114.639	93.9193	8.91698	2.41524
WBGene00045568	21ur-3115	IV	14122587	14122607	-1	#N/A	#N/A	0	0	0	0	0
WBGene00045569	21ur-4858	IV	14039587	14039607	-1	0.399053	0.466741	22.6071	39.6827	35.9103	60.1896	36.2285
WBGene00045570	21ur-422	IV	15182599	15182619	-1	0.00079111	-0.922101	259.981	207.232	196.126	122.609	111.101
WBGene00045571	21ur-3283	IV	15424750	15424770	1	0.0897935	0.721342	81.9506	60.259	35.9103	113.692	84.5333
WBGene00045572	21ur-66	IV	14979662	14979682	1	6.45469e-20	-2.79345	3382.58	2805.72	2491.62	325.47	504.784
WBGene00045573	21ur-3960	IV	14977301	14977321	-1	3.01475e-06	1.76913	28.2588	26.4552	35.9103	73.5651	123.177
WBGene00045574	21ur-3455	IV	4986105	4986125	-1	0.00107346	-5.99556	14.1294	23.5157	19.3363	0	0
WBGene00045575	21ur-3399	IV	16158130	16158150	1	1.30383e-07	1.7	59.3435	76.426	58.009	193.944	231.863
WBGene00045576	21ur-1907	IV	14583398	14583418	1	0.862114	-0.184458	19.7812	32.3341	44.1973	22.2925	32.6057
WBGene00045577	21ur-341	IV	13746337	13746357	-1	0.333963	2.4927	0	0	0	2.22925	2.41524
WBGene00045578	21ur-4400	IV	14725934	14725954	-1	1.41523e-08	-8.93462	146.946	158.731	135.354	0	0
WBGene00045579	21ur-213	IV	13939645	13939665	-1	0.0416549	-1.0393	53.6917	49.9709	44.1973	28.9802	20.5295
WBGene00045580	21ur-3922	IV	15671231	15671251	-1	0.0331633	0.604299	209.115	154.322	232.036	334.387	264.468
WBGene00045581	21ur-3683	IV	16814136	16814156	1	0.318676	0.53159	53.6917	27.9249	55.2467	66.8774	60.3809
WBGene00045582	21ur-3176	IV	15623587	15623607	-1	0.0828228	1.07738	19.7812	13.2276	11.0493	35.6679	26.5676
WBGene00045583	21ur-4174	IV	14878399	14878419	1	0.75352	-1.44094	2.82588	0	0	0	0
WBGene00045584	21ur-4213	IV	5497568	5497588	-1	0.274997	-1.53402	11.3035	5.87892	13.8117	6.68774	1.20762
WBGene00045585	21ur-687	IV	13839712	13839732	-1	1.45159e-05	1.19863	87.6023	85.2444	99.444	242.988	176.312
WBGene00045586	21ur-5133	IV	15779938	15779958	1	0.475766	1.44647	0	4.40919	0	8.91698	2.41524
WBGene00045587	21ur-4538	IV	13840064	13840084	1	1	-0.0923952	0	0	2.76233	0	1.20762
WBGene00045588	21ur-4731	IV	6033172	6033192	-1	0.205204	0.61658	45.2141	30.8644	33.148	53.5019	55.5504
WBGene00045589	21ur-1571	IV	14893381	14893401	-1	0.792528	-1.19238	0	2.93946	2.76233	2.22925	0
WBGene00045590	21ur-5440	IV	15248660	15248680	-1	1	0	0	0	0	0	0
WBGene00045591	21ur-3641	IV	13604366	13604386	-1	0.25974	-2.88745	2.82588	1.46973	2.76233	0	0
WBGene00045592	21ur-4673	IV	5336132	5336152	1	0.0332365	1.14062	19.7812	22.046	19.3363	55.7311	37.4362
WBGene00045593	21ur-2000	IV	16109395	16109415	1	0.269935	0.207005	647.127	555.558	593.902	693.295	683.512
WBGene00045594	21ur-2563	IV	15975938	15975958	1	0.118743	1.08617	16.9553	17.6368	33.148	57.9604	37.4362
WBGene00045595	21ur-676	IV	5284109	5284129	-1	0.950477	-0.0774649	121.513	74.9563	80.1077	102.545	72.4571
WBGene00045596	21ur-5434	IV	16376343	16376363	1	0.0360352	-4.55704	2.82588	7.34866	11.0493	0	0
WBGene00045597	21ur-2918	IV	14639622	14639642	-1	0.175706	1.2402	8.47764	4.40919	5.52467	17.834	10.8686
WBGene00045598	21ur-3144	IV	5882012	5882032	-1	1	0.0798488	0	1.46973	5.52467	2.22925	2.41524
WBGene00045599	21ur-3790	IV	14717683	14717703	1	1.16455e-39	-5.51717	779.943	753.972	701.633	13.3755	18.1143
WBGene00045600	21ur-3069	IV	5717445	5717465	1	0.885051	-0.139823	45.2141	49.9709	41.435	51.2727	35.0209
WBGene00045601	21ur-1104	IV	14917339	14917359	1	0.971296	-0.379345	0	4.40919	0	0	2.41524
WBGene00045602	21ur-4930	IV	16838285	16838305	-1	0.00792368	4.10686	2.82588	0	0	22.2925	7.24571
WBGene00045603	21ur-5393	IV	15439660	15439680	-1	0.180155	-3.36162	5.65176	1.46973	2.76233	0	0
WBGene00045604	21ur-4121	IV	15262572	15262592	-1	0.0410658	-3.88298	5.65176	10.2881	19.3363	0	1.20762
WBGene00045605	21ur-1446	IV	13889765	13889785	-1	1.10402e-17	-4.36082	231.722	210.172	229.274	8.91698	12.0762
WBGene00045606	21ur-4963	IV	9131636	9131656	-1	0.219837	0.517577	67.8212	85.2444	88.3947	153.818	83.3256
WBGene00045607	21ur-3239	IV	14324699	14324719	1	0.0393139	2.99622	0	0	5.52467	17.834	7.24571
WBGene00045608	21ur-4548	IV	15811661	15811681	-1	1	0.0332858	2.82588	2.93946	5.52467	2.22925	4.83047
WBGene00045609	21ur-2932	IV	15233513	15233533	1	9.35031e-10	1.20461	197.812	229.278	223.749	494.893	509.615
WBGene00045610	21ur-1584	IV	16608169	16608189	-1	0.000133497	1.05781	477.574	279.249	259.659	624.189	774.083
WBGene00045611	21ur-620	IV	16373091	16373111	1	0.363409	1.36983	0	8.81839	0	15.6047	4.83047
WBGene00045612	21ur-5367	IV	14405356	14405376	1	0.185666	1.7888	2.82588	0	5.52467	6.68774	8.45333
WBGene00045613	21ur-2568	IV	15841474	15841494	1	1	0.289755	0	1.46973	0	2.22925	0
WBGene00045614	21ur-2293	IV	15670608	15670628	-1	0.00168194	-5.82295	25.4329	5.87892	22.0987	0	0
WBGene00045615	21ur-310	IV	16522239	16522259	1	8.24177e-13	-5.55361	158.249	217.52	165.74	2.22925	4.83047
WBGene00045616	21ur-344	IV	15208441	15208461	-1	0.0163224	-2.8242	5.65176	20.5762	22.0987	2.22925	2.41524
WBGene00045617	21ur-5229	IV	5967089	5967109	1	0.293761	-3.07631	2.82588	0	5.52467	0	0
WBGene00045618	21ur-3525	IV	15099767	15099787	1	0.0617258	2.05829	2.82588	4.40919	0	11.1462	12.0762
WBGene00045619	21ur-5354	IV	5614160	5614180	-1	0.968964	0.871475	0	0	0	0	1.20762
WBGene00045620	21ur-2363	IV	14286678	14286698	-1	0.451864	0.709044	8.47764	10.2881	5.52467	11.1462	15.699
WBGene00045621	21ur-5452	IV	15144960	15144980	-1	1	0	0	0	0	0	0
WBGene00045622	21ur-2954	IV	16004254	16004274	1	0.000356733	1.17249	56.5176	57.3195	46.9597	151.589	97.8171
WBGene00045623	21ur-3951	IV	15339112	15339132	1	1	0	0	0	0	0	0
WBGene00045624	21ur-3736	IV	14634033	14634053	1	0.362685	0.405463	73.4729	76.426	60.7713	57.9604	123.177
WBGene00045625	21ur-419	IV	5178803	5178823	-1	3.90876e-14	-6.88186	228.896	288.067	312.144	2.22925	2.41524
WBGene00045626	21ur-5135	IV	15723563	15723583	1	1	0.0414043	2.82588	0	2.76233	2.22925	1.20762
WBGene00045627	21ur-4966	IV	17202418	17202438	-1	0.0188893	-2.5091	16.9553	16.167	22.0987	4.45849	2.41524
WBGene00045628	21ur-3440	IV	15269715	15269735	-1	0.410843	-0.314386	3396.71	4125.54	3361.76	2318.42	3514.17
WBGene00045629	21ur-2914	IV	15172097	15172117	1	1.17221e-11	-2.21759	163.901	182.247	198.888	46.8142	33.8133
WBGene00045630	21ur-2195	IV	15252554	15252574	1	#N/A	#N/A	0	0	0	0	0
WBGene00045631	21ur-4580	IV	14259502	14259522	1	1.13618e-10	-6.20903	203.463	176.368	132.592	0	3.62285
WBGene00045632	21ur-2136	IV	5435663	5435683	1	0.97873	0.868413	0	0	0	0	1.20762
WBGene00045633	21ur-5345	IV	14395091	14395111	-1	0.0428092	1.53769	2.82588	10.2881	11.0493	31.2094	19.3219
WBGene00045634	21ur-3163	IV	15711282	15711302	1	0.2444	-3.36175	0	5.87892	2.76233	0	0
WBGene00045635	21ur-98	IV	13800750	13800770	-1	0.0204782	-4.72266	5.65176	11.7578	5.52467	0	0
WBGene00045636	21ur-629	IV	15340252	15340272	1	2.08228e-08	1.30323	127.165	99.9417	107.731	292.031	254.807
WBGene00045637	21ur-3513	IV	14265051	14265071	1	0.199523	0.406874	118.687	102.881	104.969	167.193	124.385
WBGene00045638	21ur-4117	IV	13676365	13676385	-1	0.00169408	-1.61721	45.2141	54.3801	71.8207	24.5217	14.4914
WBGene00045639	21ur-1324	IV	14131823	14131843	1	2.95745e-05	1.32201	373.016	470.314	323.193	827.05	1123.08
WBGene00045640	21ur-2876	IV	15934211	15934231	-1	0.26999	2.85293	0	0	0	2.22925	3.62285
WBGene00045641	21ur-4617	IV	17237035	17237055	1	0.0395611	-3.80474	14.1294	4.40919	16.574	0	1.20762
WBGene00045642	21ur-3810	IV	15314888	15314908	-1	0.796431	0.397742	5.65176	8.81839	19.3363	22.2925	8.45333
WBGene00045643	21ur-2772	IV	15361319	15361339	1	0.00189071	-5.04021	19.7812	33.8038	24.861	2.22925	0
WBGene00045644	21ur-3853	IV	5133083	5133103	-1	0.0381704	-5.16065	5.65176	0	27.6233	0	0
WBGene00045645	21ur-1572	IV	14764438	14764458	1	0.838258	0.356721	11.3035	8.81839	2.76233	15.6047	6.03809
WBGene00045646	21ur-4784	IV	14220765	14220785	-1	0.00291549	2.32566	2.82588	7.34866	5.52467	33.4387	24.1524
WBGene00045647	21ur-101	IV	16002350	16002370	-1	0.0349685	-3.84092	16.9553	7.34866	11.0493	0	1.20762
WBGene00045648	21ur-4235	IV	14976698	14976718	-1	0.891768	-0.276927	16.9553	4.40919	19.3363	17.834	4.83047
WBGene00045649	21ur-198	IV	5891934	5891954	-1	2.10618e-08	-6.32184	135.642	133.746	110.493	4.45849	0
WBGene00045650	21ur-2547	IV	15251949	15251969	1	1	-0.0638666	5.65176	20.5762	19.3363	17.834	13.2838
WBGene00045651	21ur-1325	IV	14233592	14233612	-1	1.59166e-05	1.16103	76.2988	64.6682	82.87	178.34	152.16
WBGene00045652	21ur-378	IV	15694953	15694973	-1	1.46647e-05	1.71333	737.555	1236.04	560.754	2010.78	3543.15
WBGene00045653	21ur-1257	IV	5769282	5769302	-1	0.0264643	-3.91564	14.1294	13.2276	8.287	0	1.20762
WBGene00045654	21ur-3621	IV	16887548	16887568	-1	3.26558e-05	-6.30511	62.1694	61.7287	66.296	0	1.20762
WBGene00045655	21ur-2179	IV	6042267	6042287	1	0.0556176	0.73432	62.1694	88.1839	52.4843	107.004	123.177
WBGene00045656	21ur-2373	IV	14690558	14690578	1	0.883554	0.906246	0	0	0	0	1.20762
WBGene00045657	21ur-4637	IV	15329175	15329195	-1	0.30201	2.4938	0	0	0	2.22925	2.41524
WBGene00045658	21ur-5357	IV	15105629	15105649	-1	0.0010206	1.63542	11.3035	23.5157	30.3857	53.5019	80.9104
WBGene00045659	21ur-1723	IV	14743056	14743076	1	0.798376	0.993818	0	0	2.76233	2.22925	1.20762
WBGene00045660	21ur-5403	IV	15245329	15245349	1	0.0654383	3.59928	0	0	0	2.22925	7.24571
WBGene00045661	21ur-780	IV	14027179	14027199	-1	0.862114	0.818764	2.82588	0	0	0	2.41524
WBGene00045662	21ur-4553	IV	14372208	14372228	1	0.0308185	1.3657	5.65176	13.2276	22.0987	49.0434	24.1524
WBGene00045663	21ur-5087	IV	15877277	15877297	-1	0.145167	1.2311	14.1294	5.87892	5.52467	31.2094	9.66094
WBGene00045664	21ur-553	IV	14650590	14650610	-1	0.0955734	-2.27069	19.7812	8.81839	8.287	4.45849	1.20762
WBGene00045665	21ur-3191	IV	16682557	16682577	1	0.000354443	-1.13653	488.878	720.168	461.31	260.822	248.769
WBGene00045666	21ur-3306	IV	15099528	15099548	1	0.431593	-1.21388	11.3035	4.40919	11.0493	8.91698	0
WBGene00045667	21ur-22	IV	5523137	5523157	1	0.0185862	-3.27931	11.3035	17.6368	16.574	2.22925	1.20762
WBGene00045668	21ur-1242	IV	5615248	5615268	1	0.929286	0.103136	138.468	104.351	49.722	91.3991	117.139
WBGene00045669	21ur-1303	IV	16549514	16549534	1	0.098606	0.862012	19.7812	36.7433	24.861	60.1896	44.6819
WBGene00045670	21ur-2441	IV	4960928	4960948	1	0.00652402	1.19635	25.4329	22.046	35.9103	55.7311	66.419
WBGene00045671	21ur-1935	IV	15165777	15165797	1	0.0270828	2.03293	2.82588	4.40919	5.52467	20.0632	15.699
WBGene00045672	21ur-2786	IV	14607188	14607208	1	0.144783	2.48235	0	1.46973	2.76233	8.91698	7.24571
WBGene00045673	21ur-3453	IV	16089543	16089563	-1	0.000954101	-4.37485	33.9106	48.5011	13.8117	2.22925	1.20762
WBGene00045674	21ur-4693	IV	16003010	16003030	1	2.90264e-05	-3.98437	53.6917	63.1984	27.6233	2.22925	3.62285
WBGene00045675	21ur-2281	IV	16078374	16078394	-1	#N/A	#N/A	0	0	0	0	0
WBGene00045676	21ur-2712	IV	16467298	16467318	-1	7.23443e-21	-3.6545	406.927	432.101	259.659	31.2094	27.7752
WBGene00045677	21ur-5214	IV	15314218	15314238	1	0.650903	1.37769	0	2.93946	0	4.45849	2.41524
WBGene00045678	21ur-1078	IV	6060482	6060502	1	0.00259734	-1.32864	367.365	207.232	143.641	64.6481	121.969
WBGene00045679	21ur-3510	IV	5763845	5763865	1	1	0.0105976	0	0	5.52467	2.22925	1.20762
WBGene00045680	21ur-4163	IV	15578602	15578622	1	0.298137	1.2232	8.47764	2.93946	2.76233	11.1462	9.66094
WBGene00045681	21ur-5291	IV	15288590	15288610	1	0.00992651	0.558162	237.374	293.946	240.323	345.533	415.421
WBGene00045682	21ur-527	IV	13908848	13908868	-1	9.92641e-08	-1.49795	305.195	329.22	295.57	84.7113	130.423
WBGene00045683	21ur-5312	IV	14261634	14261654	-1	2.13495e-08	1.58213	98.9059	104.351	44.1973	260.822	247.562
WBGene00045684	21ur-5385	IV	5498795	5498815	1	0.0235918	-0.666153	257.155	295.416	193.363	173.881	144.914
WBGene00045685	21ur-1986	IV	17017613	17017633	-1	0.487786	-2.23911	0	1.46973	2.76233	0	0
WBGene00045686	21ur-3553	IV	15568127	15568147	1	0.684606	0.73775	2.82588	4.40919	5.52467	13.3755	2.41524
WBGene00045687	21ur-1049	IV	14364039	14364059	1	4.38992e-06	1.51645	56.5176	39.6827	41.435	138.213	120.762
WBGene00045688	21ur-4041	IV	6179746	6179766	1	0.000853882	0.943425	67.8212	83.7747	66.296	142.672	142.499
WBGene00045689	21ur-3409	IV	16059092	16059112	-1	0.913471	-1.47512	0	0	2.76233	0	0
WBGene00045690	21ur-5085	IV	14415831	14415851	-1	1	0.0222676	5.65176	7.34866	19.3363	13.3755	8.45333
WBGene00045691	21ur-4812	IV	15780730	15780750	1	0.737075	0.678598	5.65176	2.93946	2.76233	2.22925	8.45333
WBGene00045692	21ur-946	IV	16559891	16559911	-1	0.820252	0.551558	0	8.81839	0	0	9.66094
WBGene00045693	21ur-2392	IV	16250433	16250453	-1	6.67355e-34	-5.11462	469.096	520.285	665.722	20.0632	13.2838
WBGene00045694	21ur-5223	IV	15794083	15794103	1	0.944631	0.285102	5.65176	1.46973	5.52467	4.45849	4.83047
WBGene00045695	21ur-4519	IV	15145087	15145107	-1	0.00717353	-4.46502	22.6071	14.6973	16.574	0	1.20762
WBGene00045696	21ur-2704	IV	15549833	15549853	-1	0.911667	0.351789	2.82588	8.81839	0	2.22925	8.45333
WBGene00045697	21ur-481	IV	14559347	14559367	1	0.000335194	1.31872	39.5623	47.0314	49.722	111.462	115.931
WBGene00045698	21ur-5244	IV	13759239	13759259	1	0.743523	-1.43884	2.82588	0	0	0	0
WBGene00045699	21ur-5080	IV	14680109	14680129	-1	1.68227e-08	-2.43105	98.9059	102.881	118.78	22.2925	18.1143
WBGene00045700	21ur-1137	IV	16186289	16186309	-1	3.97885e-05	1.21953	76.2988	108.76	82.87	162.735	256.015
WBGene00045701	21ur-1580	IV	13718581	13718601	-1	0.00157307	-5.02582	28.2588	29.3946	19.3363	0	1.20762
WBGene00045702	21ur-1740	IV	15904054	15904074	1	0.000121185	1.87242	16.9553	17.6368	11.0493	46.8142	65.2114
WBGene00045703	21ur-457	IV	13711639	13711659	1	0.427487	0.849138	5.65176	5.87892	8.287	11.1462	12.0762
WBGene00045704	21ur-3053	IV	16105776	16105796	-1	#N/A	#N/A	0	0	0	0	0
WBGene00045705	21ur-3074	IV	14273692	14273712	-1	0.173687	0.481207	132.816	169.019	102.206	156.047	222.202
WBGene00045706	21ur-163	IV	15541886	15541906	-1	0.150549	0.417736	322.15	335.099	254.135	405.723	409.383
WBGene00045707	21ur-1530	IV	16385416	16385436	-1	6.51961e-17	-6.05022	268.459	276.309	226.511	2.22925	4.83047
WBGene00045708	21ur-3591	IV	5495648	5495668	1	0.40307	0.547718	31.0847	32.3341	5.52467	35.6679	35.0209
WBGene00045709	21ur-5427	IV	14021300	14021320	-1	0.000162616	0.919766	197.812	173.428	127.067	298.719	329.68
WBGene00045710	21ur-2758	IV	16198241	16198261	-1	2.42717e-15	-3.62605	197.812	180.777	160.215	8.91698	18.1143
WBGene00045711	21ur-2189	IV	5179876	5179896	-1	0.700202	0.786333	0	1.46973	11.0493	8.91698	4.83047
WBGene00045712	21ur-877	IV	15751606	15751626	1	0.0722402	0.911032	16.9553	27.9249	33.148	40.1264	56.7581
WBGene00045713	21ur-2188	IV	15362018	15362038	-1	0.250864	-2.55772	2.82588	7.34866	2.76233	0	1.20762
WBGene00045714	21ur-895	IV	15263589	15263609	-1	0.00578745	0.933559	189.334	204.293	113.256	292.031	357.455
WBGene00045715	21ur-764	IV	16781294	16781314	-1	0.927417	0.197381	11.3035	8.81839	2.76233	13.3755	6.03809
WBGene00045716	21ur-2080	IV	15710175	15710195	-1	1	0	0	0	0	0	0
WBGene00045717	21ur-3347	IV	16980347	16980367	1	1	-0.0853176	2.82588	0	0	0	1.20762
WBGene00045718	21ur-1995	IV	16393125	16393145	-1	0.238501	-2.48852	2.82588	2.93946	8.287	0	1.20762
WBGene00045719	21ur-927	IV	14244046	14244066	1	#N/A	#N/A	0	0	0	0	0
WBGene00045720	21ur-1318	IV	15543266	15543286	-1	0.538761	-2.93129	0	1.46973	5.52467	0	0
WBGene00045721	21ur-1126	IV	15151533	15151553	1	0.0349952	0.831582	81.9506	64.6682	66.296	169.423	86.9485
WBGene00045722	21ur-4997	IV	15621889	15621909	1	0.873966	-0.874506	2.82588	1.46973	0	0	1.20762
WBGene00045723	21ur-368	IV	14582176	14582196	1	0.0749814	1.6779	11.3035	7.34866	0	33.4387	9.66094
WBGene00045724	21ur-1377	IV	14344298	14344318	1	0.682758	-0.898279	2.82588	5.87892	2.76233	0	3.62285
WBGene00045725	21ur-4839	IV	14757137	14757157	-1	0.418104	-2.93589	5.65176	1.46973	0	0	0
WBGene00045726	21ur-4151	IV	16745635	16745655	1	1.01567e-08	-8.35859	308.021	216.05	270.709	0	1.20762
WBGene00045727	21ur-719	IV	14463088	14463108	-1	0.941246	0.239565	2.82588	2.93946	19.3363	17.834	2.41524
WBGene00045728	21ur-2397	IV	5078646	5078666	1	0.00547496	-4.60386	22.6071	19.1065	16.574	0	1.20762
WBGene00045729	21ur-4447	IV	14977148	14977168	1	1	0	0	0	0	0	0
WBGene00045730	21ur-1475	IV	15142661	15142681	-1	0.65073	0.236204	381.494	335.099	248.61	312.094	443.196
WBGene00045731	21ur-2329	IV	16897143	16897163	-1	0.0252764	0.742816	84.7764	102.881	60.7713	118.15	161.821
WBGene00045732	21ur-4317	IV	6125885	6125905	1	0.914588	-0.273489	5.65176	2.93946	38.6727	15.6047	9.66094
WBGene00045733	21ur-4254	IV	5507693	5507713	-1	6.38664e-06	-1.49266	124.339	179.307	124.305	44.5849	56.7581
WBGene00045734	21ur-3918	IV	16133525	16133545	1	0.318368	-2.42735	8.47764	2.93946	2.76233	2.22925	0
WBGene00045735	21ur-3996	IV	5864841	5864861	-1	0.16493	2.61213	0	1.46973	0	6.68774	3.62285
WBGene00045736	21ur-1612	IV	13992256	13992276	1	0.00422141	1.37828	28.2588	35.2735	24.861	109.233	51.9276
WBGene00045737	21ur-3619	IV	16063301	16063321	1	0.00396024	-3.82778	19.7812	24.9854	22.0987	2.22925	1.20762
WBGene00045738	21ur-4550	IV	5828590	5828610	-1	0.914588	-1.39229	0	1.46973	0	0	0
WBGene00045739	21ur-5063	IV	13839495	13839515	-1	0.0132203	-4.74085	2.82588	11.7578	8.287	0	0
WBGene00045740	21ur-4575	IV	13804023	13804043	-1	0.0015135	-5.70057	25.4329	7.34866	16.574	0	0
WBGene00045741	21ur-157	IV	16046621	16046641	-1	5.0106e-07	-4.39689	62.1694	66.1379	71.8207	4.45849	2.41524
WBGene00045743	21ur-5073	IV	5401360	5401380	-1	0.000242008	1.47514	53.6917	23.5157	46.9597	140.442	82.118
WBGene00045744	21ur-26	IV	16604476	16604496	-1	4.43326e-13	-6.65358	248.678	198.414	267.946	2.22925	2.41524
WBGene00045745	21ur-805	IV	13959485	13959505	1	0.125906	-4.03604	8.47764	1.46973	5.52467	0	0
WBGene00045746	21ur-1219	IV	15746171	15746191	1	4.71563e-06	-0.830732	1099.27	1222.82	1546.91	733.422	716.118
WBGene00045747	21ur-4706	IV	16613941	16613961	1	9.38765e-15	-6.25571	237.374	220.46	254.135	0	4.83047
WBGene00045748	21ur-4832	IV	5277283	5277303	-1	2.11138e-16	-3.9141	152.598	214.581	182.314	6.68774	15.699
WBGene00045749	21ur-2613	IV	15372663	15372683	1	0.914588	-1.39197	0	1.46973	0	0	0
WBGene00045750	21ur-3704	IV	16597076	16597096	1	1.1436e-07	-1.61487	180.856	196.944	140.879	62.4189	53.1352
WBGene00045751	21ur-2649	IV	16838056	16838076	1	0.96788	0.117289	731.903	612.878	455.785	517.185	783.744
WBGene00045752	21ur-909	IV	16450631	16450651	-1	0.566961	0.744899	8.47764	7.34866	2.76233	20.0632	3.62285
WBGene00045753	21ur-2356	IV	16018174	16018194	-1	0.770409	0.556258	2.82588	4.40919	5.52467	6.68774	6.03809
WBGene00045754	21ur-3041	IV	15780191	15780211	-1	0.969698	0.197246	11.3035	2.93946	2.76233	11.1462	2.41524
WBGene00045755	21ur-506	IV	5078480	5078500	1	1.37163e-09	-5.30593	101.732	138.155	127.067	2.22925	3.62285
WBGene00045756	21ur-4821	IV	14333900	14333920	-1	0.000265329	1.94655	5.65176	16.167	24.861	86.9406	38.6438
WBGene00045757	21ur-4437	IV	16690917	16690937	1	0.0318008	0.692509	101.732	123.457	118.78	216.237	160.613
WBGene00045758	21ur-133	IV	13992564	13992584	1	0.424418	1.82863	0	1.46973	0	0	4.83047
WBGene00045759	21ur-5218	IV	15694253	15694273	1	0.000837123	-5.91333	5.65176	20.5762	27.6233	0	0
WBGene00045760	21ur-4478	IV	16444230	16444250	1	0.476124	-2.92576	0	1.46973	5.52467	0	0
WBGene00045761	21ur-3127	IV	6045302	6045322	1	0.813598	-1.45303	2.82588	0	0	0	0
WBGene00045762	21ur-1620	IV	17055693	17055713	-1	0.187752	-0.970932	25.4329	17.6368	44.1973	8.91698	18.1143
WBGene00045763	21ur-3601	IV	15575155	15575175	-1	0.0032167	1.03864	827.983	1067.02	751.355	1310.8	2315
WBGene00045764	21ur-2085	IV	14364528	14364548	-1	1	0	0	0	0	0	0
WBGene00045765	21ur-4567	IV	16564731	16564751	-1	0.193039	1.41778	2.82588	7.34866	0	11.1462	10.8686
WBGene00045766	21ur-279	IV	14200071	14200091	-1	0.641658	-0.321275	39.5623	38.213	30.3857	22.2925	33.8133
WBGene00045767	21ur-2961	IV	14581197	14581217	1	1	0	0	0	0	0	0
WBGene00045768	21ur-5176	IV	13934282	13934302	-1	0.258463	2.21949	2.82588	0	0	2.22925	4.83047
WBGene00045769	21ur-1922	IV	13907798	13907818	1	0.68398	-2.2317	0	1.46973	2.76233	0	0
WBGene00045770	21ur-5265	IV	15603278	15603298	1	3.17052e-08	1.17501	158.249	163.14	146.404	394.577	318.811
WBGene00045771	21ur-237	IV	5618249	5618269	-1	0.168099	-1.39579	16.9553	14.6973	13.8117	8.91698	3.62285
WBGene00045772	21ur-4898	IV	15480018	15480038	-1	0.000152852	-2.16682	59.3435	58.7892	74.583	15.6047	13.2838
WBGene00045773	21ur-5304	IV	14684860	14684880	-1	0.285176	0.310694	288.24	299.825	400.538	432.474	384.023
WBGene00045774	21ur-4765	IV	15365487	15365507	1	6.6134e-06	1.14558	389.972	508.527	359.103	813.675	1049.42
WBGene00045775	21ur-710	IV	14367796	14367816	1	0.0139107	1.0101	149.772	170.489	292.807	501.58	321.226
WBGene00045776	21ur-3475	IV	14587996	14588016	1	0.630594	-2.43606	0	4.40919	0	0	0
WBGene00045777	21ur-3137	IV	16359723	16359743	1	0.249796	-3.49749	5.65176	4.40919	0	0	0
WBGene00045778	21ur-1912	IV	14996317	14996337	-1	2.12967e-07	-7.63394	161.075	142.564	176.789	0	1.20762
WBGene00045779	21ur-3112	IV	15405591	15405611	-1	0.0948948	-0.535908	115.861	142.564	118.78	71.3359	100.232
WBGene00045780	21ur-1878	IV	14636254	14636274	-1	0.0122641	1.07772	53.6917	66.1379	74.583	160.506	115.931
WBGene00045781	21ur-2913	IV	14630200	14630220	-1	5.61052e-06	-7.41857	53.6917	47.0314	55.2467	0	0
WBGene00045782	21ur-4300	IV	15540450	15540470	1	0.00200907	1.75114	16.9553	10.2881	8.287	42.3557	36.2285
WBGene00045783	21ur-447	IV	13950576	13950596	1	0.652824	-1.11322	0	7.34866	5.52467	0	3.62285
WBGene00045784	21ur-1	IV	16687107	16687127	1	1	-0.0634293	19.7812	8.81839	16.574	15.6047	12.0762
WBGene00045785	21ur-520	IV	13994174	13994194	1	0.90346	0.576805	2.82588	1.46973	0	0	3.62285
WBGene00045786	21ur-1018	IV	15209109	15209129	1	0.0142644	0.695389	98.9059	114.639	124.305	229.612	143.707
WBGene00045787	21ur-3818	IV	14811354	14811374	1	0.0570988	3.60678	0	0	0	2.22925	7.24571
WBGene00045788	21ur-3836	IV	5969707	5969727	1	0.732831	-0.565825	5.65176	10.2881	24.861	6.68774	10.8686
WBGene00045789	21ur-5257	IV	16391154	16391174	1	2.7157e-06	1.14558	1379.03	1527.05	1336.97	2623.82	3633.72
WBGene00045790	21ur-4773	IV	17237868	17237888	1	1.64409e-29	-6.96405	966.451	799.534	654.673	11.1462	3.62285
WBGene00045791	21ur-1977	IV	15866626	15866646	1	1	0.0522492	2.82588	1.46973	0	0	2.41524
WBGene00045792	21ur-1072	IV	14357310	14357330	-1	4.74684e-18	-3.02912	234.548	192.535	218.224	31.2094	22.9447
WBGene00045793	21ur-3911	IV	13927085	13927105	1	0.26344	-1.20472	11.3035	10.2881	24.861	8.91698	4.83047
WBGene00045794	21ur-1550	IV	15284594	15284614	-1	1	0	0	0	0	0	0
WBGene00045795	21ur-289	IV	16442356	16442376	-1	0.97873	0.868413	0	0	0	0	1.20762
WBGene00045796	21ur-3106	IV	16812997	16813017	1	0.00346508	1.20053	53.6917	57.3195	35.9103	66.8774	155.783
WBGene00045797	21ur-2624	IV	17183863	17183883	1	0.0861168	-3.92818	5.65176	7.34866	0	0	0
WBGene00045798	21ur-5413	IV	14000578	14000598	-1	2.4351e-06	-7.87942	33.9106	126.397	46.9597	0	0
WBGene00045799	21ur-2826	IV	14907156	14907176	1	0.00102237	1.50397	31.0847	22.046	27.6233	91.3991	60.3809
WBGene00045800	21ur-986	IV	17025982	17026002	-1	0.853515	0.63861	0	1.46973	5.52467	0	6.03809
WBGene00045801	21ur-1539	IV	5708524	5708544	1	1	0.110498	2.82588	0	0	2.22925	0
WBGene00045802	21ur-1687	IV	15175888	15175908	1	0.00522007	-0.75053	1571.19	1447.69	1069.02	720.046	897.26
WBGene00045803	21ur-1769	IV	16877127	16877147	1	1.06556e-20	-4.05199	265.633	214.581	218.224	11.1462	15.699
WBGene00045804	21ur-1354	IV	14983710	14983730	1	0.816755	-0.526415	0	5.87892	11.0493	4.45849	3.62285
WBGene00045805	21ur-3767	IV	5496271	5496291	1	1.39389e-13	-1.90731	878.849	868.611	1049.69	214.008	278.96
WBGene00045806	21ur-1413	IV	15386654	15386674	-1	7.1721e-94	-6.86574	2523.51	2433.87	2792.72	26.751	19.3219
WBGene00045807	21ur-2250	IV	15306027	15306047	-1	0.00618713	-0.967732	129.991	88.1839	99.444	53.5019	53.1352
WBGene00045808	21ur-1627	IV	16747523	16747543	-1	0.850762	1.61882	0	0	0	0	2.41524
WBGene00045809	21ur-630	IV	13808747	13808767	1	0.914588	-1.39196	0	1.46973	0	0	0
WBGene00045810	21ur-3054	IV	16045647	16045667	1	0.110617	2.89811	0	0	2.76233	4.45849	7.24571
WBGene00045811	21ur-1502	IV	13993009	13993029	1	0.913471	0.133058	39.5623	26.4552	63.5337	55.7311	37.4362
WBGene00045812	21ur-3808	IV	5202386	5202406	1	0.721433	0.536683	0	13.2276	8.287	15.6047	8.45333
WBGene00045813	21ur-3942	IV	14503606	14503626	1	9.19938e-05	0.871883	618.868	646.682	433.686	945.2	1132.75
WBGene00045814	21ur-5079	IV	14941256	14941276	1	0.798677	-1.44988	2.82588	0	0	0	0
WBGene00045815	21ur-1284	IV	15141300	15141320	1	0.102995	3.17157	0	0	0	2.22925	4.83047
WBGene00045816	21ur-73	IV	15234326	15234346	1	0.20252	-0.25831	1209.48	1161.09	1381.17	956.347	1125.5
WBGene00045817	21ur-4793	IV	14407708	14407728	1	0.296693	-1.01417	16.9553	20.5762	11.0493	4.45849	10.8686
WBGene00045818	21ur-3584	IV	16871160	16871180	1	0.349329	-0.405246	228.896	261.612	342.529	229.612	190.804
WBGene00045819	21ur-5261	IV	14022038	14022058	-1	1	-0.0608998	2.82588	0	0	0	1.20762
WBGene00045820	21ur-2113	IV	6499007	6499027	1	1	0	0	0	0	0	0
WBGene00045821	21ur-3060	IV	16612305	16612325	1	0.985103	-0.250316	0	1.46973	8.287	4.45849	1.20762
WBGene00045822	21ur-4192	IV	15679047	15679067	1	0.587193	0.375349	22.6071	30.8644	19.3363	37.8972	28.9828
WBGene00045823	21ur-1895	IV	16092737	16092757	-1	6.70676e-23	-3.59434	440.838	273.37	323.193	22.2925	32.6057
WBGene00045824	21ur-4351	IV	5155018	5155038	1	1.40853e-05	-6.5338	81.9506	73.4866	69.0583	2.22925	0
WBGene00045825	21ur-2587	IV	15615471	15615491	-1	0.356191	1.05465	2.82588	8.81839	5.52467	20.0632	7.24571
WBGene00045826	21ur-1680	IV	15239060	15239080	-1	0.000105098	1.18832	73.4729	94.0628	80.1077	200.632	182.35
WBGene00045827	21ur-1481	IV	16025398	16025418	-1	0.40992	-1.65638	8.47764	1.46973	5.52467	0	2.41524
WBGene00045828	21ur-5116	IV	4942171	4942191	1	0.123766	2.45803	2.82588	1.46973	0	2.22925	12.0762
WBGene00045829	21ur-2034	IV	13988371	13988391	1	1.28742e-05	-2.01353	87.6023	148.443	82.87	28.9802	25.36
WBGene00045830	21ur-4950	IV	15727463	15727483	-1	1	0	0	0	0	0	0
WBGene00045831	21ur-646	IV	16709731	16709751	-1	0.635814	2.3501	0	0	0	4.45849	0
WBGene00045832	21ur-1037	IV	15102993	15103013	1	1	0	0	0	0	0	0
WBGene00045833	21ur-4327	IV	5775789	5775809	1	4.18738e-17	-5.40819	234.548	246.915	320.431	6.68774	6.03809
WBGene00045834	21ur-552	IV	15177672	15177692	1	0.844335	0.147451	6143.47	7085.57	5168.33	5084.91	8498.01
WBGene00045835	21ur-1249	IV	14163249	14163269	-1	0.00755262	0.983889	53.6917	58.7892	69.0583	89.1698	144.914
WBGene00045836	21ur-678	IV	15142846	15142866	-1	0.787949	-0.898058	5.65176	4.40919	0	4.45849	0
WBGene00045837	21ur-155	IV	13733362	13733382	-1	1	0	0	0	0	0	0
WBGene00045838	21ur-2719	IV	14491047	14491067	-1	0.0158323	-0.500781	1037.1	1059.68	806.601	635.335	731.817
WBGene00045839	21ur-4954	IV	14608420	14608440	1	0.0861105	1.5343	5.65176	4.40919	8.287	20.0632	14.4914
WBGene00045840	21ur-2725	IV	15980159	15980179	-1	0.00754666	0.809103	132.816	180.777	143.641	260.822	278.96
WBGene00045841	21ur-436	IV	14047277	14047297	1	0.104297	0.583951	84.7764	63.1984	77.3453	111.462	109.893
WBGene00045842	21ur-1438	IV	14441512	14441532	-1	0.794462	-1.10174	0	4.40919	0	2.22925	0
WBGene00045843	21ur-4160	IV	15808770	15808790	-1	0.224049	-3.49543	2.82588	4.40919	2.76233	0	0
WBGene00045844	21ur-1456	IV	15284598	15284618	-1	1	0	0	0	0	0	0
WBGene00045845	21ur-1701	IV	16888723	16888743	1	1	0.0482166	0	1.46973	0	2.22925	0
WBGene00045846	21ur-4985	IV	15918894	15918914	1	0.000219963	-1.22005	223.245	239.566	187.839	69.1066	113.516
WBGene00045847	21ur-4756	IV	5434770	5434790	1	0.69969	0.879031	0	4.40919	2.76233	6.68774	3.62285
WBGene00045848	21ur-2018	IV	16373842	16373862	-1	#N/A	#N/A	0	0	0	0	0
WBGene00045849	21ur-5274	IV	15995085	15995105	-1	0.805943	0.997436	0	0	2.76233	2.22925	1.20762
WBGene00045850	21ur-2286	IV	15124189	15124209	1	0.723166	-0.180301	124.339	127.867	116.018	89.1698	124.385
WBGene00045851	21ur-3316	IV	14543422	14543442	-1	0.871991	0.822023	0	1.46973	0	0	2.41524
WBGene00045852	21ur-4338	IV	14830863	14830883	1	0.000571355	1.09798	76.2988	77.8958	58.009	142.672	161.821
WBGene00045853	21ur-1220	IV	13901804	13901824	-1	#N/A	#N/A	0	0	0	0	0
WBGene00045854	21ur-2975	IV	15481315	15481335	-1	0.00348012	-5.57911	5.65176	17.6368	19.3363	0	0
WBGene00045855	21ur-4682	IV	5896152	5896172	1	0.436534	0.287602	110.209	120.518	88.3947	140.442	124.385
WBGene00045856	21ur-3638	IV	5620016	5620036	-1	1	0	0	0	0	0	0
WBGene00045857	21ur-2386	IV	16259696	16259716	1	1	-0.0336241	0	1.46973	0	0	1.20762
WBGene00045858	21ur-5146	IV	5750724	5750744	1	0.897465	0.898342	0	0	0	0	1.20762
WBGene00045859	21ur-5253	IV	5587619	5587639	-1	0.938432	-0.380325	0	7.34866	0	2.22925	2.41524
WBGene00045860	21ur-31	IV	15760144	15760164	1	2.27455e-08	1.84595	36.7365	52.9103	33.148	135.984	167.859
WBGene00045861	21ur-1147	IV	15741446	15741466	1	1.26984e-20	-2.79465	505.833	571.725	549.704	53.5019	97.8171
WBGene00045862	21ur-5013	IV	14305056	14305076	-1	3.20973e-08	-1.05597	2382.22	2430.94	3439.11	1279.59	1362.19
WBGene00045863	21ur-1894	IV	13701043	13701063	-1	0.00121541	-3.30467	36.7365	14.6973	46.9597	4.45849	2.41524
WBGene00045864	21ur-5172	IV	16148752	16148772	-1	1	-0.0866747	11.3035	8.81839	19.3363	13.3755	10.8686
WBGene00045865	21ur-768	IV	15494935	15494955	-1	0.636145	0.99768	0	2.93946	2.76233	6.68774	2.41524
WBGene00045866	21ur-3690	IV	14624220	14624240	1	2.98429e-07	-2.26438	110.209	132.276	104.969	24.5217	24.1524
WBGene00045867	21ur-880	IV	15578259	15578279	-1	0.839304	-1.39811	0	1.46973	0	0	0
WBGene00045868	21ur-2141	IV	16609214	16609234	-1	0.0208251	0.760329	144.12	185.186	88.3947	178.34	297.074
WBGene00045869	21ur-178	IV	5835163	5835183	1	0.452975	-0.546612	28.2588	27.9249	19.3363	20.0632	15.699
WBGene00045870	21ur-2728	IV	15569324	15569344	-1	1.9907e-06	1.45247	180.856	273.37	265.184	501.58	812.727
WBGene00045871	21ur-4340	IV	14050618	14050638	1	1	-0.0775411	16.9553	8.81839	2.76233	4.45849	12.0762
WBGene00045872	21ur-906	IV	5869971	5869991	-1	0.725424	-1.00912	2.82588	0	11.0493	0	3.62285
WBGene00045873	21ur-2345	IV	14280553	14280573	1	1.11613e-18	-4.83116	254.329	277.779	193.363	6.68774	9.66094
WBGene00045874	21ur-754	IV	15674302	15674322	-1	0.706946	-0.41394	22.6071	16.167	19.3363	15.6047	13.2838
WBGene00045875	21ur-58	IV	15168947	15168967	-1	0.0008575	1.02031	115.861	108.76	74.583	211.778	196.842
WBGene00045876	21ur-4409	IV	5137121	5137141	1	0.134821	1.12429	11.3035	5.87892	11.0493	22.2925	16.9067
WBGene00045877	21ur-2707	IV	6161620	6161640	-1	5.79604e-15	-3.58563	138.468	157.261	176.789	8.91698	15.699
WBGene00045878	21ur-4669	IV	15150721	15150741	1	0.212161	0.959773	11.3035	10.2881	13.8117	26.751	19.3219
WBGene00045879	21ur-4724	IV	15781118	15781138	1	5.85654e-10	-1.62571	237.374	238.096	243.085	91.3991	67.6266
WBGene00045880	21ur-3842	IV	15588820	15588840	1	0.00206232	0.989186	62.1694	89.6536	60.7713	140.442	148.537
WBGene00045881	21ur-3422	IV	16551260	16551280	1	0.348447	1.53437	5.65176	0	2.76233	4.45849	8.45333
WBGene00045882	21ur-4299	IV	6069709	6069729	1	#N/A	#N/A	0	0	0	0	0
WBGene00045883	21ur-752	IV	15546991	15547011	1	#N/A	#N/A	0	0	0	0	0
WBGene00045884	21ur-250	IV	13929246	13929266	1	0.229482	1.19837	16.9553	2.93946	5.52467	20.0632	15.699
WBGene00045885	21ur-1674	IV	13675869	13675889	1	0.485119	-0.800465	16.9553	22.046	5.52467	11.1462	7.24571
WBGene00045886	21ur-48	IV	5823697	5823717	-1	0.026973	2.59983	2.82588	2.93946	0	8.91698	15.699
WBGene00045887	21ur-5194	IV	16149479	16149499	1	8.21573e-11	-3.8459	141.294	104.351	140.879	13.3755	6.03809
WBGene00045888	21ur-3779	IV	16884670	16884690	1	0.000478347	0.90456	209.115	192.535	151.928	296.49	391.268
WBGene00045889	21ur-4711	IV	16608547	16608567	1	4.551e-63	-6.1186	1294.25	1141.98	1196.09	22.2925	14.4914
WBGene00045890	21ur-5113	IV	14578763	14578783	1	4.18948e-14	-3.2243	161.075	186.656	201.65	20.0632	19.3219
WBGene00045891	21ur-4772	IV	14714760	14714780	-1	2.50065e-15	1.61848	220.419	311.583	367.39	880.552	963.679
WBGene00045892	21ur-1005	IV	14749919	14749939	1	0.0032167	1.30765	56.5176	45.5617	35.9103	131.526	97.8171
WBGene00045893	21ur-1904	IV	14915534	14915554	1	0.0549726	2.16816	0	5.87892	2.76233	22.2925	9.66094
WBGene00045894	21ur-3545	IV	16906664	16906684	-1	0.0186181	1.30927	22.6071	11.7578	19.3363	40.1264	43.4743
WBGene00045895	21ur-3246	IV	16138905	16138925	-1	0.000145838	-1.02628	607.565	435.04	383.964	198.403	263.261
WBGene00045896	21ur-2957	IV	14031169	14031189	-1	6.52235e-59	-5.46082	1898.99	1629.93	1439.18	44.5849	32.6057
WBGene00045897	21ur-3781	IV	13760220	13760240	1	0.620764	-1.20928	2.82588	10.2881	0	0	3.62285
WBGene00045898	21ur-1647	IV	14285016	14285036	-1	6.22469e-07	-5.83517	81.9506	98.472	82.87	0	2.41524
WBGene00045899	21ur-3253	IV	14942540	14942560	1	0.21143	3.27317	0	0	0	4.45849	3.62285
WBGene00045900	21ur-3297	IV	5420409	5420429	1	0.00136587	1.05107	96.08	67.6076	77.3453	171.652	156.99
WBGene00045901	21ur-3291	IV	14949074	14949094	1	0.000264664	1.24338	70.647	79.3655	85.6323	240.759	137.668
WBGene00045902	21ur-793	IV	14535261	14535281	-1	0.00106133	-5.73572	8.47764	23.5157	13.8117	0	0
WBGene00045903	21ur-1351	IV	5574738	5574758	1	1	0	0	0	0	0	0
WBGene00045904	21ur-4662	IV	14202055	14202075	1	7.98723e-08	-2.92193	104.558	67.6076	93.9193	20.0632	6.03809
WBGene00045905	21ur-5412	IV	15281087	15281107	-1	0.0235918	-4.61946	5.65176	10.2881	5.52467	0	0
WBGene00045906	21ur-3674	IV	14672518	14672538	-1	0.190742	-0.722124	36.7365	47.0314	41.435	31.2094	21.7371
WBGene00045907	21ur-3257	IV	15796808	15796828	1	0.740171	0.529005	2.82588	4.40919	11.0493	6.68774	9.66094
WBGene00045908	21ur-2819	IV	14294285	14294305	1	0.886775	-0.273911	14.1294	17.6368	8.287	8.91698	13.2838
WBGene00045909	21ur-1395	IV	16892478	16892498	-1	0.217771	0.556217	39.5623	41.1525	69.0583	66.8774	76.0799
WBGene00045910	21ur-3768	IV	6023958	6023978	1	0.0565366	1.12111	39.5623	27.9249	13.8117	37.8972	77.2876
WBGene00045911	21ur-3032	IV	13751497	13751517	-1	0.00239555	-0.844555	421.056	354.205	301.094	225.154	177.52
WBGene00045912	21ur-3577	IV	15913265	15913285	-1	0.838396	-0.147562	67.8212	51.4406	99.444	71.3359	57.9657
WBGene00045913	21ur-1092	IV	13996936	13996956	-1	1	0	0	0	0	0	0
WBGene00045914	21ur-3731	IV	14325236	14325256	1	0.190604	-1.7562	19.7812	14.6973	5.52467	4.45849	3.62285
WBGene00045915	21ur-4477	IV	14288227	14288247	1	0.371211	-2.13828	5.65176	2.93946	2.76233	2.22925	0
WBGene00045916	21ur-3434	IV	16377610	16377630	1	0.301035	-1.17649	8.47764	11.7578	24.861	8.91698	4.83047
WBGene00045917	21ur-1067	IV	13728969	13728989	1	1	0	0	0	0	0	0
WBGene00045918	21ur-4420	IV	16544651	16544671	1	1.26592e-07	-8.49239	93.2541	135.215	93.9193	0	0
WBGene00045919	21ur-1495	IV	16701751	16701771	1	2.31882e-07	-2.80541	79.1247	79.3655	93.9193	15.6047	9.66094
WBGene00045920	21ur-3670	IV	15759942	15759962	-1	0.902228	0.580447	0	1.46973	2.76233	0	3.62285
WBGene00045921	21ur-5228	IV	14197667	14197687	-1	0.0534694	-1.1693	42.3882	39.6827	22.0987	15.6047	15.699
WBGene00045922	21ur-4214	IV	14745294	14745314	1	1	0.0206337	2.82588	2.93946	11.0493	4.45849	6.03809
WBGene00045923	21ur-3896	IV	14591674	14591694	1	0.0867577	-3.43588	8.47764	8.81839	8.287	0	1.20762
WBGene00045924	21ur-1345	IV	14472419	14472439	-1	6.34474e-17	-3.83143	206.289	239.566	160.215	17.834	12.0762
WBGene00045925	21ur-1172	IV	15217207	15217227	1	0.0134273	1.61681	8.47764	14.6973	8.287	42.3557	27.7752
WBGene00045926	21ur-274	IV	16580157	16580177	1	0.223847	0.791559	31.0847	19.1065	8.287	37.8972	30.1905
WBGene00045927	21ur-2239	IV	5590895	5590915	-1	0.845607	0.414637	5.65176	2.93946	13.8117	13.3755	6.03809
WBGene00045928	21ur-5209	IV	6134941	6134961	-1	0.0896561	1.13937	8.47764	13.2276	16.574	40.1264	19.3219
WBGene00045929	21ur-257	IV	15666938	15666958	1	3.91044e-07	1.24242	186.508	169.019	245.848	508.268	433.535
WBGene00045930	21ur-844	IV	14355701	14355721	-1	1.06633e-15	-3.32877	231.722	189.595	171.265	20.0632	19.3219
WBGene00045931	21ur-4427	IV	13683982	13684002	1	1	0.234809	5.65176	0	0	0	3.62285
WBGene00045932	21ur-1418	IV	16206721	16206741	1	0.0111532	2.21871	0	7.34866	2.76233	17.834	20.5295
WBGene00045933	21ur-1134	IV	13841963	13841983	-1	1.70394e-09	-4.08516	129.991	107.29	82.87	6.68774	6.03809
WBGene00045934	21ur-500	IV	13698875	13698895	1	1.84065e-06	-3.22358	73.4729	49.9709	60.7713	11.1462	3.62285
WBGene00045935	21ur-398	IV	5815295	5815315	-1	0.190408	-2.78902	2.82588	7.34866	5.52467	0	1.20762
WBGene00045936	21ur-5171	IV	13798783	13798803	-1	0.11862	1.72557	2.82588	8.81839	0	17.834	13.2838
WBGene00045937	21ur-1628	IV	16213789	16213809	1	0.423929	1.89975	2.82588	0	0	2.22925	3.62285
WBGene00045938	21ur-4316	IV	16394278	16394298	1	0.914588	0.887793	0	0	0	0	1.20762
WBGene00045939	21ur-488	IV	14946653	14946673	-1	3.57678e-07	-4.07681	70.647	73.4866	46.9597	0	6.03809
WBGene00045940	21ur-529	IV	13828314	13828334	1	0.0498545	-4.24232	8.47764	5.87892	2.76233	0	0
WBGene00045941	21ur-4541	IV	14641217	14641237	-1	0.471847	-2.94384	5.65176	1.46973	0	0	0
WBGene00045942	21ur-188	IV	16453973	16453993	1	0.545097	-2.70834	2.82588	2.93946	0	0	0
WBGene00045943	21ur-1799	IV	14123737	14123757	-1	0.0296718	-4.50429	5.65176	8.81839	5.52467	0	0
WBGene00045944	21ur-2825	IV	16134288	16134308	1	0.353326	-3.32552	0	5.87892	2.76233	0	0
WBGene00045945	21ur-2812	IV	16140011	16140031	1	0.000524661	-6.14436	16.9553	22.046	24.861	0	0
WBGene00045946	21ur-894	IV	13751756	13751776	1	1	0	0	0	0	0	0
WBGene00045947	21ur-3590	IV	15725560	15725580	-1	0.000104217	1.22439	115.861	76.426	71.8207	214.008	193.219
WBGene00045948	21ur-4033	IV	16835645	16835665	1	0.0400611	-1.706	172.379	158.731	190.601	62.4189	44.6819
WBGene00045949	21ur-1113	IV	14870582	14870602	1	1.72047e-05	1.26294	96.08	102.881	99.444	287.573	196.842
WBGene00045950	21ur-3425	IV	16381347	16381367	1	0.00305531	2.35837	8.47764	5.87892	11.0493	66.8774	19.3219
WBGene00045951	21ur-2421	IV	13997032	13997052	-1	1	0	0	0	0	0	0
WBGene00045952	21ur-2941	IV	17206616	17206636	1	0.02683	-4.67684	5.65176	4.40919	13.8117	0	0
WBGene00045953	21ur-2023	IV	14363443	14363463	-1	0.841995	-1.45915	0	0	2.76233	0	0
WBGene00045954	21ur-2048	IV	6505803	6505823	1	0.118382	-1.39847	19.7812	23.5157	24.861	8.91698	8.45333
WBGene00045955	21ur-5198	IV	14599144	14599164	1	0.000775889	-4.23781	33.9106	26.4552	27.6233	0	2.41524
WBGene00045956	21ur-5048	IV	16041903	16041923	-1	4.65759e-07	-5.90318	90.4282	74.9563	116.018	0	2.41524
WBGene00045957	21ur-938	IV	16225244	16225264	1	0.00216456	-3.15977	33.9106	20.5762	27.6233	0	4.83047
WBGene00045958	21ur-4106	IV	5732525	5732545	-1	0.0378155	1.20178	19.7812	17.6368	13.8117	51.2727	30.1905
WBGene00045959	21ur-4442	IV	16875497	16875517	-1	0.538322	-2.24493	2.82588	1.46973	0	0	0
WBGene00045960	21ur-4804	IV	5132389	5132409	-1	0.542968	0.7735	5.65176	4.40919	5.52467	8.91698	8.45333
WBGene00045961	21ur-164	IV	13623659	13623679	1	1.12418e-06	-7.90656	70.647	48.5011	102.206	0	0
WBGene00045962	21ur-4126	IV	16164711	16164731	-1	0.000186312	-5.80726	48.04	47.0314	38.6727	0	1.20762
WBGene00045963	21ur-3197	IV	5519881	5519901	-1	0.00688969	1.29378	25.4329	49.9709	44.1973	120.379	82.118
WBGene00045964	21ur-2594	IV	14645094	14645114	1	0.0156479	0.747881	243.026	239.566	226.511	329.928	460.102
WBGene00045965	21ur-4125	IV	15615868	15615888	-1	0.0296187	-1.03321	93.2541	36.7433	52.4843	24.5217	31.3981
WBGene00045966	21ur-1954	IV	16447945	16447965	-1	0.0465205	0.768431	53.6917	85.2444	85.6323	102.545	152.16
WBGene00045967	21ur-4061	IV	14473792	14473812	-1	0.0615035	1.6209	11.3035	4.40919	2.76233	11.1462	22.9447
WBGene00045968	21ur-1524	IV	14455854	14455874	1	2.38034e-16	-4.95025	209.115	232.218	162.978	15.6047	1.20762
WBGene00045969	21ur-1125	IV	15550004	15550024	1	0.21745	-2.62567	2.82588	5.87892	5.52467	0	1.20762
WBGene00045970	21ur-1664	IV	15678947	15678967	1	0.914588	-1.39197	0	1.46973	0	0	0
WBGene00045971	21ur-3384	IV	16587756	16587776	-1	5.06823e-12	-2.06623	440.838	474.723	651.911	156.047	97.8171
WBGene00045972	21ur-514	IV	17129797	17129817	-1	0.000118114	2.0573	8.47764	14.6973	13.8117	66.8774	42.2666
WBGene00045973	21ur-2657	IV	16885810	16885830	-1	8.81032e-16	-2.73309	265.633	176.368	226.511	35.6679	31.3981
WBGene00045974	21ur-804	IV	17074350	17074370	-1	0.651386	-1.40679	2.82588	1.46973	2.76233	2.22925	0
WBGene00045975	21ur-2206	IV	14952960	14952980	1	0.0149206	-5.20609	0	8.81839	24.861	0	0
WBGene00045976	21ur-4551	IV	16676344	16676364	-1	1	-0.130717	5.65176	4.40919	2.76233	8.91698	0
WBGene00045977	21ur-2859	IV	14560450	14560470	1	1	-0.269416	2.82588	0	2.76233	0	2.41524
WBGene00045978	21ur-463	IV	16616792	16616812	1	0.00411187	-2.04537	28.2588	29.3946	46.9597	4.45849	10.8686
WBGene00045979	21ur-544	IV	14145020	14145040	1	0.000502813	1.58078	19.7812	17.6368	22.0987	71.3359	48.3047
WBGene00045980	21ur-2129	IV	14967125	14967145	1	1.42971e-07	1.47836	79.1247	79.3655	58.009	182.798	220.994
WBGene00045981	21ur-992	IV	15389246	15389266	1	3.2322e-05	1.01957	129.991	139.624	151.928	283.114	286.205
WBGene00045982	21ur-1199	IV	15813213	15813233	-1	2.78092e-05	-3.28217	50.8659	47.0314	38.6727	4.45849	4.83047
WBGene00045983	21ur-3771	IV	5492203	5492223	1	0.617561	-1.09176	2.82588	7.34866	5.52467	4.45849	1.20762
WBGene00045984	21ur-4067	IV	16831314	16831334	-1	0.825477	0.385373	0	11.7578	5.52467	11.1462	7.24571
WBGene00045985	21ur-1790	IV	15723786	15723806	1	1	0.0774521	5.65176	7.34866	0	8.91698	2.41524
WBGene00045986	21ur-1165	IV	6031844	6031864	-1	2.51675e-05	-7.00434	33.9106	38.213	44.1973	0	0
WBGene00045987	21ur-1441	IV	16181605	16181625	-1	0.285521	2.06096	0	1.46973	2.76233	8.91698	3.62285
WBGene00045988	21ur-649	IV	14970213	14970233	-1	#N/A	#N/A	0	0	0	0	0
WBGene00045989	21ur-584	IV	16087411	16087431	-1	0.888557	0.427281	5.65176	2.93946	2.76233	6.68774	3.62285
WBGene00045990	21ur-3373	IV	14565128	14565148	1	0.102783	-3.38957	11.3035	10.2881	2.76233	0	1.20762
WBGene00045991	21ur-533	IV	15864244	15864264	-1	1.72174e-08	1.1869	183.682	163.14	157.453	403.494	362.285
WBGene00045992	21ur-2309	IV	5901148	5901168	1	1.36394e-06	1.37124	418.23	423.283	278.996	806.987	1127.92
WBGene00045993	21ur-1433	IV	13838459	13838479	1	0.00167547	0.866299	87.6023	104.351	138.117	207.32	193.219
WBGene00045994	21ur-5323	IV	14166907	14166927	-1	0.000321914	1.18476	644.301	912.703	513.794	1277.36	1869.39
WBGene00045995	21ur-13	IV	13918820	13918840	-1	0.717152	-0.868009	0	4.40919	8.287	2.22925	2.41524
WBGene00045996	21ur-2495	IV	16804564	16804584	-1	0.00914603	-3.16348	14.1294	10.2881	44.1973	4.45849	1.20762
WBGene00045997	21ur-3903	IV	14983713	14983733	1	0.816755	-0.526415	0	5.87892	11.0493	4.45849	3.62285
WBGene00045998	21ur-700	IV	16640675	16640695	1	6.55764e-20	-4.54502	211.941	233.687	204.413	6.68774	10.8686
WBGene00045999	21ur-4243	IV	15890737	15890757	-1	0.215698	-3.37941	5.65176	1.46973	2.76233	0	0
WBGene00046000	21ur-4161	IV	5619195	5619215	-1	0.0429212	-2.61791	14.1294	17.6368	8.287	0	3.62285
WBGene00046001	21ur-2801	IV	15878745	15878765	-1	#N/A	#N/A	0	0	0	0	0
WBGene00046002	21ur-3048	IV	4902395	4902415	1	#N/A	#N/A	0	0	0	0	0
WBGene00046003	21ur-2997	IV	16627585	16627605	1	1	-0.00446958	42.3882	38.213	49.722	51.2727	36.2285
WBGene00046004	21ur-1621	IV	16719280	16719300	1	2.25717e-23	-3.35044	1370.55	1419.76	1193.33	113.692	144.914
WBGene00046005	21ur-3478	IV	16039005	16039025	-1	0.371422	0.848058	5.65176	5.87892	13.8117	17.834	12.0762
WBGene00046006	21ur-2362	IV	16107254	16107274	1	0.177361	-3.88156	11.3035	0	2.76233	0	0
WBGene00046007	21ur-4055	IV	15209919	15209939	1	0.000208755	1.51171	45.2141	33.8038	19.3363	104.775	84.5333
WBGene00046008	21ur-3360	IV	14362672	14362692	-1	1.19073e-13	1.1712	545.395	549.679	486.171	1214.94	1166.56
WBGene00046009	21ur-2849	IV	14164864	14164884	1	0.00215524	1.59487	16.9553	10.2881	19.3363	57.9604	33.8133
WBGene00046010	21ur-2648	IV	15749455	15749475	1	0.00245056	1.6777	11.3035	22.046	52.4843	124.838	57.9657
WBGene00046011	21ur-5342	IV	14624634	14624654	1	1	0.0106306	101.732	139.624	99.444	120.379	113.516
WBGene00046012	21ur-2424	IV	14639380	14639400	-1	3.9506e-44	-7.3215	1006.01	1131.69	1312.11	15.6047	2.41524
WBGene00046013	21ur-5021	IV	15144586	15144606	-1	0.617561	-0.201668	132.816	194.005	187.839	169.423	135.253
WBGene00046014	21ur-2448	IV	5176268	5176288	-1	1	0	0	0	0	0	0
WBGene00046015	21ur-963	IV	15896622	15896642	1	0.000487305	-3.85162	11.3035	54.3801	35.9103	4.45849	1.20762
WBGene00046016	21ur-2994	IV	15406156	15406176	1	0.959226	-0.0853906	39.5623	49.9709	69.0583	51.2727	48.3047
WBGene00046017	21ur-50	IV	14877377	14877397	-1	0.99993	-0.192439	5.65176	4.40919	0	2.22925	3.62285
WBGene00046018	21ur-4221	IV	16625142	16625162	-1	0.0952	2.72288	0	2.93946	0	11.1462	7.24571
WBGene00046019	21ur-1857	IV	15179302	15179322	-1	0.690565	-2.0013	0	2.93946	0	0	0
WBGene00046020	21ur-3185	IV	15562010	15562030	-1	0.0572844	-2.52207	11.3035	13.2276	13.8117	0	3.62285
WBGene00046021	21ur-76	IV	14971569	14971589	1	9.13826e-05	1.023	517.136	543.801	428.162	880.552	1137.58
WBGene00046022	21ur-2945	IV	15920579	15920599	1	0.919322	1.3263	0	0	0	2.22925	0
WBGene00046023	21ur-292	IV	15421159	15421179	1	0.236227	0.891449	14.1294	14.6973	22.0987	46.8142	18.1143
WBGene00046024	21ur-2625	IV	15396919	15396939	-1	0.334042	-3.08047	2.82588	4.40919	0	0	0
WBGene00046025	21ur-5231	IV	14268472	14268492	-1	0.201899	1.51285	0	2.93946	5.52467	13.3755	4.83047
WBGene00046026	21ur-2556	IV	14366794	14366814	1	7.25269e-09	-4.94776	76.2988	102.881	107.731	2.22925	3.62285
WBGene00046027	21ur-2007	IV	14878244	14878264	1	0.884713	0.313938	2.82588	7.34866	11.0493	11.1462	7.24571
WBGene00046028	21ur-1881	IV	16479682	16479702	1	0.0597908	-4.01229	2.82588	5.87892	5.52467	0	0
WBGene00046029	21ur-505	IV	16042244	16042264	-1	5.87085e-08	1.71325	56.5176	88.1839	58.009	218.466	237.901
WBGene00046030	21ur-3209	IV	6176712	6176732	-1	#N/A	#N/A	0	0	0	0	0
WBGene00046031	21ur-1747	IV	14749614	14749634	-1	0.0432431	0.916928	31.0847	17.6368	38.6727	51.2727	51.9276
WBGene00046032	21ur-4085	IV	14999879	14999899	1	2.60651e-06	1.35484	90.4282	120.518	116.018	205.091	350.209
WBGene00046033	21ur-4741	IV	16574038	16574058	1	#N/A	#N/A	0	0	0	0	0
WBGene00046034	21ur-4381	IV	17186777	17186797	-1	0.375447	-2.92783	5.65176	1.46973	0	0	0
WBGene00046035	21ur-3101	IV	5902664	5902684	1	0.0463058	1.56808	5.65176	7.34866	8.287	15.6047	25.36
WBGene00046036	21ur-4419	IV	5197143	5197163	1	0.826186	1.40325	0	1.46973	0	4.45849	0
WBGene00046037	21ur-1690	IV	14602638	14602658	1	0.412054	0.519765	64.9953	24.9854	16.574	35.6679	60.3809
WBGene00046038	21ur-729	IV	14345619	14345639	-1	0.570622	0.769461	11.3035	1.46973	5.52467	6.68774	10.8686
WBGene00046039	21ur-1340	IV	17185756	17185776	-1	0.174151	-4.043	2.82588	1.46973	11.0493	0	0
WBGene00046040	21ur-1659	IV	14301372	14301392	1	0.000473162	1.16342	79.1247	58.7892	63.5337	164.964	134.046
WBGene00046041	21ur-2213	IV	15216501	15216521	-1	0.865388	0.708339	2.82588	0	2.76233	4.45849	1.20762
WBGene00046042	21ur-2163	IV	14274093	14274113	1	0.000696384	1.55585	28.2588	17.6368	13.8117	57.9604	56.7581
WBGene00046043	21ur-2794	IV	15897358	15897378	-1	0.0907174	1.08474	11.3035	17.6368	11.0493	17.834	38.6438
WBGene00046044	21ur-3565	IV	15832687	15832707	-1	1	0.0204808	8.47764	7.34866	13.8117	17.834	3.62285
WBGene00046045	21ur-3761	IV	16687491	16687511	1	3.24697e-08	-1.56129	955.148	728.987	582.852	218.466	289.828
WBGene00046046	21ur-1920	IV	15482966	15482986	1	1.03299e-08	-1.22622	322.15	405.646	414.35	171.652	156.99
WBGene00046047	21ur-2923	IV	14751839	14751859	1	0.438553	0.529992	22.6071	16.167	41.435	46.8142	28.9828
WBGene00046048	21ur-869	IV	13722850	13722870	-1	0.0147405	4.33169	0	0	0	11.1462	6.03809
WBGene00046049	21ur-5303	IV	16033325	16033345	1	0.487382	0.228666	322.15	217.52	198.888	269.739	300.697
WBGene00046050	21ur-1865	IV	5584089	5584109	1	0.269174	1.37092	2.82588	4.40919	2.76233	6.68774	10.8686
WBGene00046051	21ur-631	IV	13726217	13726237	-1	0.805612	0.138809	96.08	98.472	99.444	122.609	96.6094
WBGene00046052	21ur-825	IV	15724658	15724678	1	0.884377	0.905733	0	0	0	0	1.20762
WBGene00046053	21ur-3599	IV	16357771	16357791	-1	0.210075	1.86043	2.82588	1.46973	2.76233	8.91698	7.24571
WBGene00046054	21ur-5208	IV	14751836	14751856	1	0.438553	0.529992	22.6071	16.167	41.435	46.8142	28.9828
WBGene00046055	21ur-1934	IV	14555659	14555679	-1	0.00041803	0.866565	129.991	98.472	113.256	207.32	201.672
WBGene00046056	21ur-3544	IV	15624379	15624399	1	1	-0.0433775	0	1.46973	0	0	1.20762
WBGene00046057	21ur-1696	IV	15989519	15989539	1	5.03414e-05	1.50225	33.9106	23.5157	44.1973	104.775	80.9104
WBGene00046058	21ur-1274	IV	5425097	5425117	1	0.812915	0.356494	19.7812	2.93946	24.861	31.2094	8.45333
WBGene00046059	21ur-1837	IV	15986317	15986337	-1	0.0015785	1.20104	93.2541	67.6076	52.4843	164.964	160.613
WBGene00046060	21ur-2661	IV	14966689	14966709	1	0.396039	1.62653	2.82588	0	2.76233	4.45849	4.83047
WBGene00046061	21ur-919	IV	6042100	6042120	-1	0.913471	-1.3927	0	1.46973	0	0	0
WBGene00046062	21ur-3336	IV	15102451	15102471	-1	1.16168e-05	1.0203	226.071	324.811	207.175	517.185	525.314
WBGene00046063	21ur-3570	IV	15978663	15978683	-1	0.0015635	0.898975	254.329	233.687	174.027	461.454	367.116
WBGene00046064	21ur-5051	IV	6494022	6494042	1	#N/A	#N/A	0	0	0	0	0
WBGene00046065	21ur-1383	IV	17261548	17261568	-1	6.02281e-08	-3.48129	73.4729	70.5471	143.641	6.68774	9.66094
WBGene00046066	21ur-391	IV	14284599	14284619	1	0.000209512	0.968078	486.052	486.481	439.211	762.402	1074.78
WBGene00046067	21ur-4480	IV	16544405	16544425	1	0.0613357	1.99973	5.65176	5.87892	0	22.2925	12.0762
WBGene00046068	21ur-1845	IV	15727512	15727532	1	0.0274014	0.948998	28.2588	51.4406	27.6233	78.0236	68.8342
WBGene00046069	21ur-3010	IV	15262354	15262374	-1	0.173763	1.1335	14.1294	1.46973	11.0493	17.834	15.699
WBGene00046070	21ur-3871	IV	13761158	13761178	1	0.406342	0.70137	25.4329	14.6973	5.52467	31.2094	19.3219
WBGene00046071	21ur-2883	IV	16248785	16248805	-1	0.00291408	1.26428	42.3882	79.3655	63.5337	153.818	149.745
WBGene00046072	21ur-727	IV	14038024	14038044	1	0.241626	3.17642	0	0	0	6.68774	1.20762
WBGene00046073	21ur-1591	IV	13719446	13719466	1	0.0123977	1.22347	31.0847	39.6827	27.6233	104.775	55.5504
WBGene00046074	21ur-1918	IV	14554517	14554537	-1	0.673968	1.54581	0	1.46973	0	2.22925	2.41524
WBGene00046075	21ur-4616	IV	6481968	6481988	1	0.14978	-0.875113	36.7365	27.9249	33.148	20.0632	15.699
WBGene00046076	21ur-5404	IV	16623031	16623051	1	1.0116e-26	-4.8947	313.673	367.433	298.332	13.3755	9.66094
WBGene00046077	21ur-5213	IV	6178898	6178918	-1	0.899419	0.0750383	627.346	487.951	378.44	570.687	480.632
WBGene00046078	21ur-299	IV	5775507	5775527	1	0.179994	-3.36152	5.65176	1.46973	2.76233	0	0
WBGene00046079	21ur-1001	IV	14830288	14830308	1	8.08389e-41	-5.57973	607.565	574.665	767.929	20.0632	9.66094
WBGene00046080	21ur-1426	IV	14156786	14156806	-1	0.120684	2.43978	0	2.93946	0	4.45849	9.66094
WBGene00046081	21ur-4624	IV	15286231	15286251	-1	0.325596	0.625954	36.7365	19.1065	13.8117	37.8972	32.6057
WBGene00046082	21ur-912	IV	15063352	15063372	-1	0.911724	1.283	0	0	0	2.22925	0
WBGene00046083	21ur-2734	IV	14435857	14435877	1	0.307323	-2.89815	0	1.46973	5.52467	0	0
WBGene00046084	21ur-1042	IV	5830666	5830686	-1	0.482605	-2.71005	0	2.93946	2.76233	0	0
WBGene00046085	21ur-23	IV	16206597	16206617	-1	0.169862	-3.94095	0	10.2881	2.76233	0	0
WBGene00046086	21ur-325	IV	5213902	5213922	1	#N/A	#N/A	0	0	0	0	0
WBGene00046087	21ur-734	IV	16678764	16678784	1	0.0234094	-4.67429	8.47764	4.40919	11.0493	0	0
WBGene00046088	21ur-409	IV	15697656	15697676	1	0.187246	0.881958	22.6071	8.81839	16.574	33.4387	22.9447
WBGene00046089	21ur-2171	IV	15206003	15206023	-1	0.14192	2.42511	2.82588	1.46973	0	6.68774	8.45333
WBGene00046090	21ur-5053	IV	15247743	15247763	1	0.674604	0.594004	5.65176	4.40919	5.52467	4.45849	9.66094
WBGene00046091	21ur-1566	IV	15253964	15253984	1	0.834576	-0.110403	435.186	358.614	292.807	305.407	362.285
WBGene00046092	21ur-41	IV	17038557	17038577	1	0.532118	-2.23715	0	1.46973	2.76233	0	0
WBGene00046093	21ur-2297	IV	15307844	15307864	-1	6.06032e-05	-2.40627	70.647	136.685	132.592	8.91698	31.3981
WBGene00046094	21ur-265	IV	5787504	5787524	1	0.213954	0.734312	53.6917	23.5157	8.287	51.2727	42.2666
WBGene00046095	21ur-2391	IV	16059521	16059541	1	6.52736e-11	1.2253	161.075	185.186	193.363	425.786	419.043
WBGene00046096	21ur-1686	IV	14932050	14932070	1	0.00345643	2.04262	2.82588	8.81839	13.8117	44.5849	27.7752
WBGene00046097	21ur-971	IV	5506448	5506468	1	0.763091	-1.97512	0	2.93946	0	0	0
WBGene00046098	21ur-4091	IV	13679205	13679225	-1	0.2832	0.705368	19.7812	13.2276	30.3857	42.3557	25.36
WBGene00046099	21ur-2017	IV	13765183	13765203	1	0.0315197	-4.56476	5.65176	2.93946	13.8117	0	0
WBGene00046100	21ur-2779	IV	13863695	13863715	1	0.476577	0.619961	8.47764	13.2276	8.287	22.2925	12.0762
WBGene00046101	21ur-146	IV	14584885	14584905	1	0.0338243	-1.99986	19.7812	14.6973	24.861	6.68774	3.62285
WBGene00046102	21ur-4653	IV	16108380	16108400	1	1	0	0	0	0	0	0
WBGene00046103	21ur-3464	IV	16471543	16471563	1	0.00806012	-5.33233	8.47764	4.40919	24.861	0	0
WBGene00046104	21ur-4454	IV	5769501	5769521	1	0.478823	2.25273	0	0	0	4.45849	0
WBGene00046105	21ur-191	IV	15699348	15699368	1	0.0286858	1.43756	8.47764	10.2881	16.574	31.2094	31.3981
WBGene00046106	21ur-480	IV	16806009	16806029	-1	2.43775e-10	-4.46905	115.861	116.109	77.3453	4.45849	4.83047
WBGene00046107	21ur-400	IV	14460683	14460703	-1	0.97873	0.0722013	36.7365	45.5617	46.9597	35.6679	53.1352
WBGene00046108	21ur-4846	IV	14090917	14090937	-1	6.32931e-10	-3.0219	146.946	132.276	243.085	28.9802	15.699
WBGene00046109	21ur-2935	IV	5974848	5974868	-1	8.58267e-09	1.63258	96.08	94.0628	151.928	396.806	304.32
WBGene00046110	21ur-1289	IV	15678948	15678968	1	0.914588	-1.39197	0	1.46973	0	0	0
WBGene00046111	21ur-4116	IV	15426410	15426430	-1	0.914588	0.406953	2.82588	5.87892	0	6.68774	2.41524
WBGene00046112	21ur-2751	IV	5907385	5907405	1	0.0135736	1.24254	14.1294	23.5157	41.435	64.6481	59.1733
WBGene00046113	21ur-1190	IV	14405962	14405982	-1	2.48672e-07	-1.45	234.548	274.84	273.471	66.8774	118.347
WBGene00046114	21ur-2298	IV	14224784	14224804	-1	5.70304e-07	-1.82514	211.941	189.595	149.166	69.1066	38.6438
WBGene00046115	21ur-2939	IV	15547845	15547865	1	0.00820771	2.56483	2.82588	2.93946	5.52467	13.3755	27.7752
WBGene00046116	21ur-2746	IV	16567650	16567670	-1	0.215862	-1.26122	8.47764	30.8644	35.9103	13.3755	8.45333
WBGene00046117	21ur-2479	IV	14401109	14401129	1	0.418702	0.42183	67.8212	74.9563	52.4843	71.3359	102.648
WBGene00046118	21ur-3327	IV	16088869	16088889	-1	0.000290755	1.71709	22.6071	73.4866	33.148	178.34	123.177
WBGene00046119	21ur-2409	IV	14718182	14718202	-1	0.00682315	-1.20979	113.035	105.821	71.8207	35.6679	47.0971
WBGene00046120	21ur-3797	IV	15939725	15939745	1	0.819784	-1.45442	2.82588	0	0	0	0
WBGene00046121	21ur-3554	IV	16146294	16146314	1	5.21308e-33	-5.03898	398.449	476.193	530.368	17.834	12.0762
WBGene00046122	21ur-4738	IV	15207231	15207251	1	0.215307	-3.24039	2.82588	2.93946	2.76233	0	0
WBGene00046123	21ur-4521	IV	14047698	14047718	1	0.0381658	-3.76065	8.47764	13.2276	11.0493	2.22925	0
WBGene00046124	21ur-2672	IV	16551072	16551092	1	2.62602e-07	1.70912	25.4329	51.4406	35.9103	115.921	141.291
WBGene00046125	21ur-1236	IV	16543188	16543208	1	0.895591	0.482972	0	2.93946	5.52467	4.45849	3.62285
WBGene00046126	21ur-2837	IV	16537820	16537840	-1	0.790113	-0.785888	2.82588	4.40919	0	2.22925	1.20762
WBGene00046127	21ur-3884	IV	15073346	15073366	-1	0.185666	2.77338	0	0	0	0	4.83047
WBGene00046128	21ur-305	IV	14924270	14924290	1	1	0	0	0	0	0	0
WBGene00046129	21ur-4457	IV	14803672	14803692	-1	0.00290869	-5.67293	5.65176	24.9854	13.8117	0	0
WBGene00046130	21ur-3376	IV	15629866	15629886	-1	0.156768	-1.35952	8.47764	10.2881	33.148	8.91698	4.83047
WBGene00046131	21ur-2193	IV	13873398	13873418	-1	0.000432421	1.5558	39.5623	16.167	27.6233	98.0868	59.1733
WBGene00046132	21ur-4375	IV	14126024	14126044	-1	7.38743e-14	1.41639	714.948	833.338	883.947	2035.3	2293.27
WBGene00046133	21ur-2638	IV	13956565	13956585	-1	3.95417e-06	1.39782	141.294	94.0628	85.6323	242.988	311.565
WBGene00046134	21ur-3999	IV	14899529	14899549	-1	0.0628893	1.59009	5.65176	2.93946	11.0493	22.2925	14.4914
WBGene00046135	21ur-1264	IV	16547563	16547583	1	0.000381951	1.43056	39.5623	117.578	129.83	305.407	219.786
WBGene00046136	21ur-888	IV	16817129	16817149	1	0.144667	0.429418	418.23	355.675	248.61	468.142	451.649
WBGene00046137	21ur-1033	IV	15660597	15660617	1	1	0.391064	0	1.46973	0	2.22925	0
WBGene00046138	21ur-2220	IV	13830698	13830718	1	0.370964	0.212369	1752.05	1743.1	2267.88	2416.5	2034.84
WBGene00046139	21ur-86	IV	5787751	5787771	-1	0.714336	-2.59549	5.65176	0	0	0	0
WBGene00046140	21ur-3206	IV	13964184	13964204	-1	1	0	0	0	0	0	0
WBGene00046141	21ur-487	IV	14170702	14170722	-1	1	0.0659128	0	5.87892	8.287	11.1462	0
WBGene00046142	21ur-983	IV	16396588	16396608	1	6.56833e-08	-4.37433	64.9953	149.913	118.78	4.45849	6.03809
WBGene00046143	21ur-4973	IV	5974965	5974985	-1	#N/A	#N/A	0	0	0	0	0
WBGene00046144	21ur-3756	IV	15841816	15841836	-1	0.164533	0.603938	70.647	55.8498	110.493	142.672	95.4018
WBGene00046145	21ur-3658	IV	17173943	17173963	1	0.587384	1.76612	0	0	0	0	2.41524
WBGene00046146	21ur-3158	IV	15997223	15997243	-1	0.000642387	1.11599	421.056	462.965	259.659	617.501	1037.34
WBGene00046147	21ur-3223	IV	16353004	16353024	1	5.02514e-05	-1.3106	149.772	121.988	146.404	55.7311	55.5504
WBGene00046148	21ur-2402	IV	5807934	5807954	-1	0.814866	-1.0263	5.65176	0	0	0	1.20762
WBGene00046149	21ur-225	IV	14981339	14981359	1	0.553165	-0.162086	398.449	392.418	516.556	374.513	398.514
WBGene00046150	21ur-4885	IV	14096118	14096138	1	0.0312687	-4.74208	2.82588	2.93946	19.3363	0	0
WBGene00046151	21ur-2319	IV	15947649	15947669	1	1	0	0	0	0	0	0
WBGene00046152	21ur-4143	IV	14973613	14973633	-1	0.830029	1.05713	0	0	0	2.22925	0
WBGene00046153	21ur-4749	IV	14945727	14945747	-1	0.00107346	-1.81648	53.6917	60.259	33.148	15.6047	13.2838
WBGene00046154	21ur-4599	IV	15436626	15436646	-1	0.0031738	-1.02903	3153.68	3658.16	2795.48	1310.8	1825.92
WBGene00046155	21ur-5377	IV	14972383	14972403	-1	0.000146891	1.01547	206.289	136.685	116.018	276.426	333.303
WBGene00046156	21ur-1546	IV	16452202	16452222	1	1	0	0	0	0	0	0
WBGene00046157	21ur-2076	IV	5797784	5797804	1	0.284323	-0.628755	45.2141	45.5617	46.9597	28.9802	30.1905
WBGene00046158	21ur-1153	IV	16359636	16359656	1	0.679784	2.01892	0	0	0	2.22925	1.20762
WBGene00046159	21ur-5181	IV	15243053	15243073	-1	1	0	0	0	0	0	0
WBGene00046160	21ur-1718	IV	15751727	15751747	1	2.96015e-09	-2.31004	209.115	364.493	212.7	35.6679	67.6266
WBGene00046161	21ur-816	IV	5914403	5914423	1	0.0886353	-2.21716	11.3035	11.7578	11.0493	4.45849	1.20762
WBGene00046162	21ur-1402	IV	15699453	15699473	1	0.0153844	1.54057	8.47764	26.4552	11.0493	60.1896	38.6438
WBGene00046163	21ur-361	IV	15275397	15275417	1	0.904617	0.233822	11.3035	11.7578	24.861	20.0632	16.9067
WBGene00046164	21ur-5001	IV	15148572	15148592	-1	3.92949e-12	-3.40527	107.383	111.7	162.978	15.6047	9.66094
WBGene00046165	21ur-410	IV	16618040	16618060	1	0.847488	-0.907698	2.82588	0	2.76233	2.22925	0
WBGene00046166	21ur-2455	IV	16545177	16545197	1	2.96378e-05	1.21404	183.682	220.46	116.018	372.284	441.988
WBGene00046167	21ur-2338	IV	16640905	16640925	1	0.892113	-0.639961	0	1.46973	5.52467	0	2.41524
WBGene00046168	21ur-2603	IV	14693529	14693549	-1	0.992555	0.205184	8.47764	2.93946	0	6.68774	2.41524
WBGene00046169	21ur-4763	IV	15310569	15310589	1	0.211209	1.38794	5.65176	4.40919	2.76233	13.3755	9.66094
WBGene00046170	21ur-1512	IV	6187712	6187732	1	0.0853459	1.12156	25.4329	10.2881	19.3363	42.3557	33.8133
WBGene00046171	21ur-51	IV	16835240	16835260	-1	0.47106	0.452018	42.3882	33.8038	19.3363	33.4387	51.9276
WBGene00046172	21ur-1279	IV	16887952	16887972	-1	0.0154025	4.07768	0	0	0	6.68774	7.24571
WBGene00046173	21ur-3233	IV	15869032	15869052	1	0.174573	1.68194	0	10.2881	0	22.2925	7.24571
WBGene00046174	21ur-653	IV	14051949	14051969	-1	0.881438	0.906963	0	0	0	0	1.20762
WBGene00046175	21ur-745	IV	14051794	14051814	1	0.665613	-1.11689	8.47764	1.46973	2.76233	4.45849	0
WBGene00046176	21ur-3971	IV	14470642	14470662	1	5.57835e-21	-5.92217	322.15	352.735	325.955	6.68774	4.83047
WBGene00046177	21ur-2344	IV	17074903	17074923	1	1	0	0	0	0	0	0
WBGene00046178	21ur-1872	IV	14525197	14525217	-1	1	0	0	0	0	0	0
WBGene00046179	21ur-663	IV	15330774	15330794	1	6.38276e-05	-6.12632	56.5176	55.8498	55.2467	0	1.20762
WBGene00046180	21ur-498	IV	15867721	15867741	-1	0.645699	-1.72345	2.82588	4.40919	0	0	1.20762
WBGene00046181	21ur-1650	IV	16700757	16700777	1	1	0	0	0	0	0	0
WBGene00046182	21ur-3294	IV	14812662	14812682	1	0.210983	2.61437	2.82588	0	0	6.68774	3.62285
WBGene00046183	21ur-4540	IV	14811017	14811037	1	0.967984	0.376	0	1.46973	2.76233	4.45849	0
WBGene00046184	21ur-491	IV	14380555	14380575	-1	0.853515	-1.46198	0	0	2.76233	0	0
WBGene00046185	21ur-546	IV	15429297	15429317	1	0.914588	-1.39197	0	1.46973	0	0	0
WBGene00046186	21ur-1420	IV	14306167	14306187	-1	4.42816e-05	1.16226	84.7764	86.7141	85.6323	185.027	198.049
WBGene00046187	21ur-4	IV	13730709	13730729	-1	0.913471	0.544615	5.65176	0	0	2.22925	2.41524
WBGene00046188	21ur-2647	IV	17226436	17226456	-1	0.0055781	-5.42132	11.3035	20.5762	5.52467	0	0
WBGene00046189	21ur-2354	IV	6054944	6054964	1	0.000325343	1.45419	39.5623	44.0919	24.861	129.296	78.4952
WBGene00046190	21ur-3976	IV	15777728	15777748	1	0.164676	1.30166	8.47764	7.34866	5.52467	20.0632	15.699
WBGene00046191	21ur-3788	IV	13992301	13992321	-1	0.00213539	1.17446	194.986	465.905	243.085	517.185	854.994
WBGene00046192	21ur-3682	IV	5890035	5890055	-1	0.913471	-1.39244	0	1.46973	0	0	0
WBGene00046193	21ur-3287	IV	16251565	16251585	1	6.23207e-45	-8.50913	1989.42	2076.73	2801.01	6.68774	6.03809
WBGene00046194	21ur-2435	IV	15724101	15724121	-1	0.00211524	-0.940266	172.379	199.883	157.453	80.2529	102.648
WBGene00046195	21ur-3526	IV	15721508	15721528	-1	0.00578743	-3.01884	33.9106	13.2276	27.6233	0	4.83047
WBGene00046196	21ur-1266	IV	13725890	13725910	-1	0.586715	2.48776	0	0	0	2.22925	2.41524
WBGene00046197	21ur-1841	IV	5442930	5442950	-1	0.173104	-3.35706	5.65176	1.46973	2.76233	0	0
WBGene00046198	21ur-1812	IV	17180868	17180888	-1	0.488636	1.97417	0	0	0	2.22925	1.20762
WBGene00046199	21ur-3654	IV	17049123	17049143	-1	2.65982e-05	-7.09572	33.9106	30.8644	60.7713	0	0
WBGene00046200	21ur-2225	IV	16367944	16367964	-1	0.000113063	-6.7814	28.2588	20.5762	52.4843	0	0
WBGene00046201	21ur-5313	IV	14347724	14347744	-1	0.853105	0.830802	2.82588	0	0	0	2.41524
WBGene00046202	21ur-4236	IV	14564008	14564028	-1	0.793283	0.991192	2.82588	0	0	2.22925	1.20762
WBGene00046203	21ur-1177	IV	15495046	15495066	-1	0.00283755	-3.42057	31.0847	29.3946	11.0493	0	3.62285
WBGene00046204	21ur-1120	IV	16208486	16208506	1	1	-0.0172219	36.7365	27.9249	24.861	31.2094	27.7752
WBGene00046205	21ur-5165	IV	17032902	17032922	-1	4.40226e-18	-4.28993	245.852	173.428	185.076	11.1462	9.66094
WBGene00046206	21ur-2890	IV	15883990	15884010	1	0.00966987	-5.0458	8.47764	10.2881	11.0493	0	0
WBGene00046207	21ur-3238	IV	14995803	14995823	-1	1.67582e-07	-8.38118	115.861	102.881	82.87	0	0
WBGene00046208	21ur-1304	IV	14711385	14711405	-1	0.000109525	1.70889	28.2588	39.6827	8.287	89.1698	89.3637
WBGene00046209	21ur-333	IV	14269555	14269575	1	3.69868e-08	1.43196	96.08	119.048	107.731	356.679	237.901
WBGene00046210	21ur-5266	IV	13940535	13940555	1	1	0	0	0	0	0	0
WBGene00046211	21ur-3035	IV	16986551	16986571	1	0.000196811	-6.55163	11.3035	22.046	52.4843	0	0
WBGene00046212	21ur-2987	IV	6080137	6080157	1	0.245879	-3.3841	2.82588	1.46973	5.52467	0	0
WBGene00046213	21ur-4622	IV	5105257	5105277	-1	0.263359	0.391965	76.2988	114.639	129.83	160.506	125.592
WBGene00046214	21ur-3184	IV	17027431	17027451	-1	2.47431e-05	0.93049	305.195	295.416	198.888	503.81	518.068
WBGene00046215	21ur-377	IV	14682817	14682837	1	0.506923	1.64404	0	0	2.76233	4.45849	1.20762
WBGene00046216	21ur-3528	IV	14103645	14103665	-1	0.00196227	-5.13321	28.2588	11.7578	46.9597	0	1.20762
WBGene00046217	21ur-3408	IV	16980062	16980082	1	1	0	0	0	0	0	0
WBGene00046218	21ur-2688	IV	15387098	15387118	1	1.28651e-18	-1.81186	827.983	845.095	908.808	256.363	235.486
WBGene00046219	21ur-38	IV	16789030	16789050	1	0.00203171	0.943494	73.4729	72.0168	58.009	153.818	113.516
WBGene00046220	21ur-3131	IV	5770496	5770516	-1	0.307564	1.05727	11.3035	7.34866	5.52467	31.2094	4.83047
WBGene00046221	21ur-3061	IV	15755887	15755907	1	0.736671	0.612068	5.65176	0	11.0493	8.91698	6.03809
WBGene00046222	21ur-5453	IV	14910568	14910588	-1	0.0013584	1.28613	33.9106	29.3946	44.1973	84.7113	85.7409
WBGene00046223	21ur-5217	IV	15763871	15763891	-1	1.07942e-07	-4.42432	127.165	188.126	52.4843	8.91698	3.62285
WBGene00046224	21ur-4164	IV	15210872	15210892	-1	0.806517	0.230221	11.3035	33.8038	46.9597	40.1264	33.8133
WBGene00046225	21ur-2035	IV	13960652	13960672	-1	0.0863887	1.54427	2.82588	10.2881	2.76233	22.2925	14.4914
WBGene00046226	21ur-3271	IV	16118282	16118302	-1	0.47106	1.21186	2.82588	1.46973	2.76233	0	8.45333
WBGene00046227	21ur-1936	IV	13957711	13957731	-1	0.0107899	-5.14993	2.82588	14.6973	13.8117	0	0
WBGene00046228	21ur-692	IV	15973139	15973159	1	0.650327	0.373886	11.3035	14.6973	33.148	13.3755	32.6057
WBGene00046229	21ur-4699	IV	15161495	15161515	1	2.58559e-20	-2.95973	265.633	299.825	312.144	55.7311	25.36
WBGene00046230	21ur-1835	IV	15912426	15912446	-1	0.00707492	1.80247	8.47764	7.34866	8.287	28.9802	26.5676
WBGene00046231	21ur-102	IV	14265720	14265740	1	2.84901e-05	-1.19254	689.515	853.914	607.713	307.636	321.226
WBGene00046232	21ur-1053	IV	14481731	14481751	1	0.000723597	-5.98408	16.9553	16.167	24.861	0	0
WBGene00046233	21ur-4845	IV	14951696	14951716	1	1.30749e-05	1.87653	31.0847	20.5762	19.3363	113.692	61.5885
WBGene00046234	21ur-2303	IV	15627048	15627068	-1	0.249774	-3.03272	2.82588	0	5.52467	0	0
WBGene00046235	21ur-3441	IV	15360101	15360121	1	0.699565	-2.40249	0	4.40919	0	0	0
WBGene00046236	21ur-4426	IV	16825885	16825905	1	0.0172111	1.27679	11.3035	32.3341	19.3363	31.2094	73.6647
WBGene00046237	21ur-1968	IV	14493147	14493167	-1	0.319093	-0.985529	16.9553	16.167	16.574	13.3755	4.83047
WBGene00046238	21ur-5086	IV	15258834	15258854	1	0.0348793	-0.54899	299.543	238.096	240.323	189.486	165.444
WBGene00046239	21ur-881	IV	16191948	16191968	-1	0.00787781	3.91107	0	1.46973	0	15.6047	9.66094
WBGene00046240	21ur-4792	IV	14987901	14987921	1	0.00161872	0.984993	81.9506	69.0774	63.5337	140.442	141.291
WBGene00046241	21ur-3516	IV	16085325	16085345	1	1	0.0590474	0	0	2.76233	2.22925	0
WBGene00046242	21ur-4291	IV	15477247	15477267	1	0.10266	-1.25339	22.6071	20.5762	22.0987	4.45849	12.0762
WBGene00046243	21ur-4581	IV	16072440	16072460	-1	#N/A	#N/A	0	0	0	0	0
WBGene00046244	21ur-4326	IV	14226366	14226386	-1	5.15236e-22	-3.62019	440.838	276.309	428.162	33.4387	28.9828
WBGene00046245	21ur-4965	IV	5419651	5419671	1	0.00011388	-4.71045	33.9106	42.6222	46.9597	2.22925	1.20762
WBGene00046246	21ur-4605	IV	14674166	14674186	-1	2.43707e-16	-1.65658	658.43	530.573	580.09	185.027	187.181
WBGene00046247	21ur-572	IV	16898438	16898458	-1	0.136217	0.639863	84.7764	105.821	63.5337	142.672	126.8
WBGene00046248	21ur-197	IV	17051044	17051064	-1	1.6841e-11	1.10558	1381.86	1841.57	1825.9	3441.96	3811.24
WBGene00046249	21ur-1283	IV	14423518	14423538	1	4.18528e-45	-5.65347	1353.6	1607.89	1593.87	33.4387	27.7752
WBGene00046250	21ur-2119	IV	6183393	6183413	-1	0.293394	-0.818873	19.7812	22.046	30.3857	15.6047	12.0762
WBGene00046251	21ur-579	IV	14322337	14322357	-1	0.439102	1.26373	2.82588	0	8.287	11.1462	4.83047
WBGene00046252	21ur-390	IV	5181672	5181692	1	0.627968	-2.23351	0	1.46973	2.76233	0	0
WBGene00046253	21ur-5384	IV	15101237	15101257	1	4.73523e-11	1.56077	243.026	227.808	196.126	597.438	712.495
WBGene00046254	21ur-1273	IV	15869521	15869541	1	0.437875	-0.201615	539.743	530.573	533.13	454.766	473.386
WBGene00046255	21ur-1038	IV	14997273	14997293	-1	0.000882917	-1.49426	67.8212	69.0774	71.8207	28.9802	21.7371
WBGene00046256	21ur-3196	IV	15544982	15545002	1	1.60437e-51	-5.79382	844.939	949.446	806.601	15.6047	15.699
WBGene00046257	21ur-4577	IV	6185415	6185435	1	0.122948	-0.878713	48.04	45.5617	80.1077	44.5849	20.5295
WBGene00046258	21ur-654	IV	15146595	15146615	-1	0.960829	0.290034	8.47764	0	2.76233	4.45849	3.62285
WBGene00046259	21ur-4511	IV	14890805	14890825	-1	0.140513	0.775541	16.9553	26.4552	24.861	40.1264	39.8514
WBGene00046260	21ur-2695	IV	15655042	15655062	-1	1	0	0	0	0	0	0
WBGene00046261	21ur-4114	IV	5612254	5612274	-1	0.212106	-1.65654	16.9553	7.34866	11.0493	8.91698	0
WBGene00046262	21ur-21	IV	6186929	6186949	1	0.216969	-3.50149	5.65176	4.40919	0	0	0
WBGene00046263	21ur-3635	IV	15945883	15945903	1	0.466043	1.56537	2.82588	1.46973	0	6.68774	2.41524
WBGene00046264	21ur-1258	IV	14392623	14392643	1	7.49705e-35	-4.65678	449.315	429.161	408.825	11.1462	20.5295
WBGene00046265	21ur-2903	IV	16384155	16384175	-1	0.000456199	0.742136	1189.7	1249.27	1046.92	1807.92	2080.73
WBGene00046266	21ur-4849	IV	15772384	15772404	-1	0.00315698	-4.87717	31.0847	26.4552	13.8117	2.22925	0
WBGene00046267	21ur-297	IV	6195544	6195564	1	0.12694	3.38888	0	0	0	6.68774	2.41524
WBGene00046268	21ur-416	IV	14871549	14871569	1	1	0	0	0	0	0	0
WBGene00046269	21ur-4638	IV	14508127	14508147	-1	0.00359831	1.63633	16.9553	35.2735	16.574	93.6283	59.1733
WBGene00046270	21ur-2058	IV	5072747	5072767	-1	2.52695e-09	-5.6473	98.9059	120.518	138.117	4.45849	1.20762
WBGene00046271	21ur-1762	IV	15171426	15171446	1	0.0842684	0.588988	67.8212	94.0628	63.5337	118.15	114.724
WBGene00046272	21ur-4915	IV	5342519	5342539	-1	4.24855e-05	-6.27165	53.6917	64.6682	66.296	0	1.20762
WBGene00046273	21ur-4134	IV	14475277	14475297	-1	0.321152	0.439917	96.08	76.426	82.87	138.213	94.1942
WBGene00046274	21ur-597	IV	16207352	16207372	1	0.0265533	1.48708	8.47764	17.6368	8.287	22.2925	44.6819
WBGene00046275	21ur-1241	IV	13609342	13609362	-1	0.983166	-0.382097	0	0	8.287	0	3.62285
WBGene00046276	21ur-3809	IV	16705110	16705130	1	0.837574	0.10294	847.764	670.197	566.278	664.315	822.388
WBGene00046277	21ur-2131	IV	14590598	14590618	1	0.913471	-0.176893	22.6071	13.2276	33.148	17.834	20.5295
WBGene00046278	21ur-610	IV	16112671	16112691	-1	0.151522	-3.02938	11.3035	0	11.0493	2.22925	0
WBGene00046279	21ur-2442	IV	15921889	15921909	-1	1.87697e-06	-4.03046	48.04	64.6682	71.8207	0	6.03809
WBGene00046280	21ur-3189	IV	17202863	17202883	-1	1.77374e-08	-2.98975	101.732	121.988	104.969	11.1462	15.699
WBGene00046281	21ur-606	IV	16020311	16020331	-1	0.587193	0.666788	11.3035	7.34866	11.0493	26.751	6.03809
WBGene00046282	21ur-1640	IV	17050724	17050744	1	0.928369	-0.3858	8.47764	1.46973	0	2.22925	2.41524
WBGene00046283	21ur-499	IV	15747709	15747729	1	0.670218	-1.57737	0	5.87892	0	0	1.20762
WBGene00046284	21ur-5242	IV	14526835	14526855	1	0.000852417	-2.29424	36.7365	63.1984	30.3857	15.6047	4.83047
WBGene00046285	21ur-311	IV	16838685	16838705	1	0.502491	-0.675654	299.543	349.796	309.381	196.174	204.087
WBGene00046286	21ur-5233	IV	14354650	14354670	-1	0.0207902	1.27572	11.3035	20.5762	13.8117	49.0434	31.3981
WBGene00046287	21ur-4694	IV	14244607	14244627	-1	8.04495e-07	-4.58035	79.1247	105.821	33.148	2.22925	3.62285
WBGene00046288	21ur-2915	IV	16733050	16733070	1	1	0	0	0	0	0	0
WBGene00046289	21ur-5066	IV	17238857	17238877	1	0.150598	-3.33868	5.65176	1.46973	2.76233	0	0
WBGene00046290	21ur-5038	IV	15657510	15657530	-1	3.14425e-15	-7.15298	339.106	273.37	406.063	4.45849	1.20762
WBGene00046291	21ur-337	IV	13754641	13754661	1	4.67157e-05	-4.21651	45.2141	42.6222	46.9597	4.45849	1.20762
WBGene00046292	21ur-1079	IV	16175955	16175975	-1	0.000652712	1.06861	149.772	169.019	96.6817	287.573	300.697
WBGene00046293	21ur-1702	IV	16838691	16838711	-1	4.86871e-17	-3.61137	570.828	377.721	284.52	22.2925	42.2666
WBGene00046294	21ur-2380	IV	5957514	5957534	-1	1	0	0	0	0	0	0
WBGene00046295	21ur-1206	IV	15278052	15278072	-1	0.00108646	1.1377	39.5623	38.213	33.148	78.0236	84.5333
WBGene00046296	21ur-2530	IV	16183242	16183262	-1	0.00970679	1.31787	25.4329	20.5762	8.287	44.5849	47.0971
WBGene00046297	21ur-1234	IV	14239635	14239655	1	0.00681409	1.25245	25.4329	45.5617	16.574	78.0236	71.2495
WBGene00046298	21ur-2468	IV	14881563	14881583	1	0.266008	2.29224	0	0	2.76233	4.45849	3.62285
WBGene00046299	21ur-1867	IV	15697322	15697342	1	0.084832	-4.23152	0	5.87892	11.0493	0	0
WBGene00046300	21ur-554	IV	14669639	14669659	1	0.102832	0.701061	2142.02	2701.37	1745.79	2603.76	4538.23
WBGene00046301	21ur-4813	IV	15628232	15628252	-1	0.437951	-0.664226	22.6071	22.046	22.0987	13.3755	14.4914
WBGene00046302	21ur-2374	IV	15164703	15164723	1	2.26613e-06	0.987335	466.27	461.496	348.054	847.113	845.333
WBGene00046303	21ur-4759	IV	15820813	15820833	-1	0.467465	1.82603	0	1.46973	0	6.68774	0
WBGene00046304	21ur-5112	IV	13615765	13615785	-1	1.60835e-05	-5.25108	67.8212	63.1984	44.1973	0	2.41524
WBGene00046305	21ur-3997	IV	16092545	16092565	1	0.0215951	-4.83624	8.47764	4.40919	13.8117	0	0
WBGene00046306	21ur-1913	IV	16718714	16718734	1	#N/A	#N/A	0	0	0	0	0
WBGene00046307	21ur-648	IV	15864182	15864202	-1	3.46115e-05	1.12779	223.245	255.733	162.978	399.035	541.013
WBGene00046308	21ur-362	IV	15245736	15245756	-1	7.61308e-07	-8.04047	104.558	76.426	58.009	0	0
WBGene00046309	21ur-2727	IV	16069473	16069493	-1	0.160347	-3.1587	19.7812	1.46973	2.76233	2.22925	0
WBGene00046310	21ur-4644	IV	14009393	14009413	1	0.0400452	2.04986	2.82588	7.34866	0	20.0632	14.4914
WBGene00046311	21ur-245	IV	16699591	16699611	-1	0.869731	0.0845715	469.096	573.195	483.408	537.248	545.843
WBGene00046312	21ur-2870	IV	16252310	16252330	-1	0.162178	0.792456	22.6071	23.5157	35.9103	53.5019	41.059
WBGene00046313	21ur-3912	IV	5820979	5820999	1	0.0190813	-3.37122	8.47764	16.167	22.0987	0	2.41524
WBGene00046314	21ur-5435	IV	16254982	16255002	-1	0.0714006	-2.0964	36.7365	10.2881	5.52467	4.45849	3.62285
WBGene00046315	21ur-4869	IV	14976397	14976417	1	7.61743e-10	-1.85406	339.106	405.646	375.677	100.316	106.27
WBGene00046316	21ur-5262	IV	13824165	13824185	1	3.72666e-08	1.1977	172.379	202.823	171.265	390.118	450.442
WBGene00046317	21ur-3509	IV	15660307	15660327	1	8.22041e-05	1.48967	19.7812	45.5617	30.3857	75.7944	111.101
WBGene00046318	21ur-4870	IV	5099574	5099594	1	0.914588	0.885531	0	0	0	0	1.20762
WBGene00046319	21ur-193	IV	4845245	4845265	1	1	0.17417	0	1.46973	0	2.22925	0
WBGene00046320	21ur-2840	IV	14747096	14747116	1	0.0486193	-3.19254	22.6071	5.87892	13.8117	0	2.41524
WBGene00046321	21ur-3611	IV	5925397	5925417	1	#N/A	#N/A	0	0	0	0	0
WBGene00046322	21ur-3919	IV	16239449	16239469	1	0.0535652	0.782203	121.513	107.29	63.5337	129.296	204.087
WBGene00046323	21ur-3143	IV	17015779	17015799	-1	0.291205	0.883136	5.65176	11.7578	5.52467	13.3755	16.9067
WBGene00046324	21ur-2168	IV	15220415	15220435	-1	0.630594	0.278747	36.7365	39.6827	63.5337	66.8774	47.0971
WBGene00046325	21ur-2449	IV	15732697	15732717	1	0.0370712	-4.44259	8.47764	5.87892	5.52467	0	0
WBGene00046326	21ur-585	IV	15214367	15214387	-1	0.00233444	-1.76433	45.2141	41.1525	44.1973	15.6047	10.8686
WBGene00046327	21ur-67	IV	5505629	5505649	-1	1	0	0	0	0	0	0
WBGene00046328	21ur-456	IV	15118472	15118492	-1	0.00113662	1.22774	31.0847	41.1525	30.3857	84.7113	80.9104
WBGene00046329	21ur-2278	IV	15066797	15066817	-1	0.97873	0.868413	0	0	0	0	1.20762
WBGene00046330	21ur-4031	IV	15810938	15810958	1	0.00842265	-2.82864	19.7812	27.9249	19.3363	4.45849	2.41524
WBGene00046331	21ur-4971	IV	15393157	15393177	-1	1.66307e-23	-3.16871	254.329	304.234	270.709	24.5217	35.0209
WBGene00046332	21ur-3261	IV	15115332	15115352	1	1	0	0	0	0	0	0
WBGene00046333	21ur-4319	IV	16732810	16732830	1	0.000795902	1.25529	1186.87	1153.74	776.216	1787.86	3171.21
WBGene00046334	21ur-4629	IV	16799770	16799790	-1	1	-0.0455574	19.7812	20.5762	35.9103	28.9802	20.5295
WBGene00046335	21ur-2814	IV	16167638	16167658	1	0.0003311	0.889452	443.663	476.193	395.014	760.173	865.862
WBGene00046336	21ur-1248	IV	5932726	5932746	-1	0.826636	1.00679	0	0	2.76233	2.22925	1.20762
WBGene00046337	21ur-2162	IV	5833693	5833713	-1	0.907778	-1.39321	0	1.46973	0	0	0
WBGene00046338	21ur-5002	IV	13699915	13699935	-1	1	0	0	0	0	0	0
WBGene00046339	21ur-3454	IV	14382935	14382955	-1	7.99586e-12	1.50918	118.687	146.973	171.265	419.098	411.798
WBGene00046340	21ur-5029	IV	15495936	15495956	-1	0.0239982	-2.51691	25.4329	14.6973	13.8117	2.22925	3.62285
WBGene00046341	21ur-1154	IV	16562186	16562206	-1	5.48721e-05	1.65618	28.2588	42.6222	33.148	118.15	107.478
WBGene00046342	21ur-2871	IV	16593668	16593688	1	0.537106	1.02113	2.82588	2.93946	2.76233	8.91698	3.62285
WBGene00046343	21ur-2955	IV	15089824	15089844	1	3.90677e-29	-2.69517	582.132	562.907	665.722	91.3991	94.1942
WBGene00046344	21ur-4309	IV	15662439	15662459	1	0.866053	0.570984	2.82588	4.40919	0	4.45849	3.62285
WBGene00046345	21ur-3647	IV	15815227	15815247	1	0.0053047	0.839322	76.2988	63.1984	74.583	138.213	115.931
WBGene00046346	21ur-4399	IV	13987340	13987360	-1	0.000520314	-5.57578	16.9553	41.1525	55.2467	0	1.20762
WBGene00046347	21ur-1187	IV	15904582	15904602	1	0.037919	1.57422	8.47764	8.81839	2.76233	20.0632	21.7371
WBGene00046348	21ur-342	IV	15160810	15160830	1	5.11014e-10	1.19858	347.583	421.813	444.736	976.41	888.807
WBGene00046349	21ur-1886	IV	14159715	14159735	1	0.101019	1.37196	11.3035	8.81839	5.52467	33.4387	13.2838
WBGene00046350	21ur-3314	IV	13701023	13701043	1	0.244112	-3.5718	0	7.34866	2.76233	0	0
WBGene00046351	21ur-3150	IV	15399455	15399475	1	0.700715	0.789127	2.82588	0	11.0493	2.22925	10.8686
WBGene00046352	21ur-3433	IV	5761176	5761196	-1	0.00204629	-4.00191	16.9553	22.046	41.435	4.45849	0
WBGene00046353	21ur-2960	IV	14125770	14125790	1	0.101911	-3.82319	2.82588	4.40919	5.52467	0	0
WBGene00046354	21ur-4268	IV	14895171	14895191	1	4.25124e-06	-7.52573	53.6917	52.9103	60.7713	0	0
WBGene00046355	21ur-4549	IV	5803585	5803605	1	#N/A	#N/A	0	0	0	0	0
WBGene00046356	21ur-4831	IV	14368459	14368479	1	1	0.010706	76.2988	72.0168	55.2467	73.5651	65.2114
WBGene00046357	21ur-2820	IV	15366573	15366593	-1	1.06307e-09	-2.67428	163.901	119.048	127.067	31.2094	14.4914
WBGene00046358	21ur-4185	IV	14569218	14569238	-1	0.00207286	0.954875	146.946	176.368	129.83	300.948	291.036
WBGene00046359	21ur-1750	IV	4961243	4961263	-1	0.478392	-2.71918	2.82588	2.93946	0	0	0
WBGene00046360	21ur-4712	IV	14564280	14564300	1	0.619058	-0.441986	22.6071	29.3946	52.4843	22.2925	27.7752
WBGene00046361	21ur-5450	IV	14495784	14495804	1	0.165774	0.713702	76.2988	217.52	88.3947	176.11	249.977
WBGene00046362	21ur-3114	IV	14489179	14489199	1	0.414175	0.460308	36.7365	83.7747	30.3857	82.4821	65.2114
WBGene00046363	21ur-4436	IV	15422228	15422248	1	4.88607e-30	-2.20516	1150.13	1050.86	1356.31	258.593	254.807
WBGene00046364	21ur-4924	IV	16253668	16253688	1	0.199223	-3.36164	0	1.46973	8.287	0	0
WBGene00046365	21ur-532	IV	16782419	16782439	-1	0.00153274	-5.13582	25.4329	16.167	46.9597	2.22925	0
WBGene00046366	21ur-673	IV	16177805	16177825	-1	0.0740985	2.68051	0	2.93946	0	11.1462	7.24571
WBGene00046367	21ur-3062	IV	16718183	16718203	-1	0.205163	-2.3912	2.82588	13.2276	5.52467	0	2.41524
WBGene00046368	21ur-920	IV	14267967	14267987	-1	0.0148005	2.279	5.65176	7.34866	0	35.6679	13.2838
WBGene00046369	21ur-4717	IV	14969969	14969989	-1	0.395084	-1.58088	5.65176	0	11.0493	2.22925	1.20762
WBGene00046370	21ur-3175	IV	14741860	14741880	1	0.0414177	0.916808	90.4282	80.8352	35.9103	95.8576	164.236
WBGene00046371	21ur-1570	IV	15961111	15961131	1	1	0	0	0	0	0	0
WBGene00046372	21ur-4897	IV	15273825	15273845	1	0.720987	-1.4342	0	0	2.76233	0	0
WBGene00046373	21ur-4857	IV	16107311	16107331	1	0.00118656	0.967945	511.485	509.997	309.381	731.193	1005.95
WBGene00046374	21ur-4539	IV	14976503	14976523	1	0.00160056	1.2288	39.5623	24.9854	30.3857	62.4189	78.4952
WBGene00046375	21ur-3397	IV	16112451	16112471	-1	1	0	0	0	0	0	0
WBGene00046376	21ur-81	IV	17173257	17173277	-1	0.960841	-0.28913	5.65176	2.93946	0	2.22925	2.41524
WBGene00046377	21ur-3921	IV	16792626	16792646	-1	0.867789	-0.92247	5.65176	0	0	2.22925	0
WBGene00046378	21ur-1103	IV	4840702	4840722	-1	1	0	0	0	0	0	0
WBGene00046379	21ur-147	IV	14395216	14395236	-1	0.660417	0.261392	33.9106	38.213	71.8207	71.3359	44.6819
WBGene00046380	21ur-3107	IV	16281978	16281998	1	0.913471	1.30126	0	0	0	2.22925	0
WBGene00046381	21ur-4508	IV	16557825	16557845	-1	0.993081	0.0650259	67.8212	64.6682	55.2467	64.6481	66.419
WBGene00046382	21ur-5258	IV	14457023	14457043	-1	1	0	0	0	0	0	0
WBGene00046383	21ur-3174	IV	14250081	14250101	-1	1	-0.386842	0	2.93946	0	2.22925	0
WBGene00046384	21ur-4931	IV	15821329	15821349	-1	5.19144e-05	1.16647	152.598	101.411	116.018	269.739	275.337
WBGene00046385	21ur-5441	IV	14735127	14735147	-1	1	0.212616	2.82588	0	0	2.22925	0
WBGene00046386	21ur-1119	IV	15483473	15483493	1	0.836055	1.05132	0	1.46973	0	2.22925	1.20762
WBGene00046387	21ur-350	IV	15719723	15719743	1	0.790216	-0.214868	48.04	39.6827	55.2467	49.0434	33.8133
WBGene00046388	21ur-5106	IV	15180632	15180652	1	2.29569e-05	-4.48662	62.1694	70.5471	22.0987	2.22925	2.41524
WBGene00046389	21ur-492	IV	15389512	15389532	1	0.00371695	0.950124	921.237	1042.04	776.216	1299.65	2228.06
WBGene00046390	21ur-1602	IV	14249986	14250006	1	3.68477e-20	-3.65048	268.459	258.673	262.422	28.9802	15.699
WBGene00046391	21ur-2720	IV	16728095	16728115	1	2.22052e-06	1.1321	336.28	451.207	566.278	1099.02	883.976
WBGene00046392	21ur-2453	IV	14908748	14908768	-1	0.108282	-3.70831	8.47764	1.46973	2.76233	0	0
WBGene00046393	21ur-5287	IV	16605821	16605841	1	0.161179	-2.53727	14.1294	13.2276	0	2.22925	1.20762
WBGene00046394	21ur-1503	IV	15421668	15421688	1	0.00172564	1.43982	36.7365	16.167	33.148	104.775	47.0971
WBGene00046395	21ur-4681	IV	13727066	13727086	-1	0.95068	-0.269737	0	8.81839	2.76233	2.22925	4.83047
WBGene00046396	21ur-5414	IV	15687820	15687840	1	0.130518	-3.92434	2.82588	2.93946	8.287	0	0
WBGene00046397	21ur-1460	IV	15914825	15914845	1	1	0	0	0	0	0	0
WBGene00046398	21ur-2584	IV	13762282	13762302	-1	0.00466406	1.74761	14.1294	69.0774	19.3363	131.526	113.516
WBGene00046399	21ur-2750	IV	16244086	16244106	1	0.0176402	-4.16295	19.7812	10.2881	13.8117	0	1.20762
WBGene00046400	21ur-769	IV	17156745	17156765	1	0.00190661	1.35397	31.0847	26.4552	13.8117	55.7311	66.419
WBGene00046401	21ur-2251	IV	15555447	15555467	-1	1	0	0	0	0	0	0
WBGene00046402	21ur-954	IV	5438539	5438559	1	1.95844e-07	1.57605	70.647	63.1984	55.2467	160.506	211.333
WBGene00046403	21ur-3642	IV	16716264	16716284	-1	0.0021811	1.12144	322.15	493.83	436.449	615.272	1201.58
WBGene00046404	21ur-4955	IV	5193423	5193443	-1	1.76183e-06	-4.72296	50.8659	70.5471	66.296	4.45849	1.20762
WBGene00046405	21ur-1198	IV	6180344	6180364	-1	0.979172	0.133268	11.3035	10.2881	8.287	17.834	6.03809
WBGene00046406	21ur-5338	IV	14369172	14369192	-1	0.0006733	0.918962	129.991	149.913	129.83	229.612	287.413
WBGene00046407	21ur-1897	IV	15678016	15678036	1	0.756225	-0.32788	39.5623	26.4552	44.1973	17.834	37.4362
WBGene00046408	21ur-1525	IV	15433612	15433632	-1	0.700978	-1.38115	2.82588	2.93946	0	0	1.20762
WBGene00046409	21ur-241	IV	14624948	14624968	-1	0.00109988	2.23903	2.82588	11.7578	5.52467	40.1264	32.6057
WBGene00046410	21ur-645	IV	13706049	13706069	-1	7.76384e-29	-6.47979	587.783	584.953	480.646	2.22925	8.45333
WBGene00046411	21ur-4453	IV	16897545	16897565	1	1.57106e-14	-5.64099	186.508	182.247	220.987	4.45849	3.62285
WBGene00046412	21ur-3834	IV	15087132	15087152	-1	0.887572	-1.3944	0	1.46973	0	0	0
WBGene00046413	21ur-4212	IV	15232644	15232664	1	0.113955	-4.15005	5.65176	7.34866	2.76233	0	0
WBGene00046414	21ur-4330	IV	15981548	15981568	1	0.00724374	-2.07744	36.7365	27.9249	30.3857	2.22925	10.8686
WBGene00046415	21ur-1906	IV	15707250	15707270	-1	0.586637	0.231304	887.327	918.582	809.364	983.097	1063.91
WBGene00046416	21ur-3796	IV	5614621	5614641	-1	0.790727	-1.44801	2.82588	0	0	0	0
WBGene00046417	21ur-1212	IV	4876800	4876820	1	0.352407	1.67395	5.65176	0	2.76233	6.68774	8.45333
WBGene00046418	21ur-1310	IV	15413573	15413593	-1	0.36883	-3.23792	2.82588	2.93946	2.76233	0	0
WBGene00046419	21ur-1228	IV	16363632	16363652	1	3.31602e-05	-6.93603	25.4329	42.6222	41.435	0	0
WBGene00046420	21ur-403	IV	15621476	15621496	-1	#N/A	#N/A	0	0	0	0	0
WBGene00046421	21ur-281	IV	5721217	5721237	1	1	0	0	0	0	0	0
WBGene00046422	21ur-5358	IV	14668197	14668217	1	0.0608221	0.804993	31.0847	36.7433	41.435	44.5849	78.4952
WBGene00046423	21ur-4341	IV	14587486	14587506	1	0.871938	-0.153751	104.558	117.578	74.583	95.8576	84.5333
WBGene00046424	21ur-1084	IV	5119729	5119749	1	#N/A	#N/A	0	0	0	0	0
WBGene00046425	21ur-3843	IV	5896155	5896175	1	0.436534	0.287602	110.209	120.518	88.3947	140.442	124.385
WBGene00046426	21ur-3120	IV	14408847	14408867	-1	0.116672	0.498133	406.927	457.086	281.758	543.936	541.013
WBGene00046427	21ur-5254	IV	16799356	16799376	-1	0.874637	-1.39536	0	1.46973	0	0	0
WBGene00046428	21ur-2285	IV	16069992	16070012	-1	9.47958e-14	-2.31027	254.329	214.581	287.283	60.1896	43.4743
WBGene00046429	21ur-5109	IV	15997222	15997242	-1	0.000642387	1.11599	421.056	462.965	259.659	617.501	1037.34
WBGene00046430	21ur-4986	IV	14568960	14568980	1	1.60835e-05	1.23451	59.3435	83.7747	80.1077	207.32	153.367
WBGene00046431	21ur-3927	IV	14704960	14704980	-1	0.612818	-1.23957	5.65176	4.40919	0	0	2.41524
WBGene00046432	21ur-2097	IV	14728245	14728265	1	0.888143	-1.46934	2.82588	0	0	0	0
WBGene00046433	21ur-3008	IV	15273585	15273605	1	0.114597	-2.41534	5.65176	5.87892	16.574	4.45849	0
WBGene00046434	21ur-755	IV	13874671	13874691	1	0.854982	-1.46237	0	0	2.76233	0	0
WBGene00046435	21ur-1626	IV	5035214	5035234	-1	0.112979	0.910139	33.9106	8.81839	24.861	40.1264	37.4362
WBGene00046436	21ur-4588	IV	5099218	5099238	1	1	0	0	0	0	0	0
WBGene00046437	21ur-1146	IV	5149287	5149307	-1	5.59673e-21	-3.94715	505.833	367.433	265.184	20.0632	27.7752
WBGene00046438	21ur-2159	IV	15346684	15346704	1	0.138253	-0.742776	59.3435	49.9709	60.7713	44.5849	25.36
WBGene00046439	21ur-2711	IV	17046023	17046043	1	0.87245	0.549886	2.82588	2.93946	0	2.22925	3.62285
WBGene00046440	21ur-1703	IV	14234237	14234257	1	0.348025	0.501297	56.5176	89.6536	91.157	120.379	106.27
WBGene00046441	21ur-2888	IV	5335354	5335374	1	0.0170724	-3.4489	19.7812	22.046	13.8117	4.45849	0
WBGene00046442	21ur-4458	IV	15609485	15609505	1	0.319093	0.428205	56.5176	80.8352	60.7713	86.9406	94.1942
WBGene00046443	21ur-2030	IV	15967787	15967807	-1	0.00254735	1.92707	2.82588	13.2276	5.52467	22.2925	38.6438
WBGene00046444	21ur-2920	IV	15245179	15245199	-1	0.914588	-1.39198	0	1.46973	0	0	0
WBGene00046445	21ur-2974	IV	14144752	14144772	-1	0.000626586	1.44756	28.2588	14.6973	24.861	49.0434	64.0038
WBGene00046446	21ur-4004	IV	15918086	15918106	-1	2.99649e-06	-2.04477	96.08	80.8352	80.1077	24.5217	18.1143
WBGene00046447	21ur-701	IV	16122701	16122721	1	0.0435137	1.87439	11.3035	1.46973	2.76233	15.6047	16.9067
WBGene00046448	21ur-1423	IV	4942507	4942527	-1	0.384439	2.15988	2.82588	0	0	6.68774	1.20762
WBGene00046449	21ur-4410	IV	15486615	15486635	-1	1	0	0	0	0	0	0
WBGene00046450	21ur-2410	IV	16380638	16380658	1	1.1279e-10	-5.00024	172.379	104.351	93.9193	0	6.03809
WBGene00046451	21ur-3016	IV	15835924	15835944	-1	0.0110294	-0.797342	118.687	155.792	176.789	91.3991	83.3256
WBGene00046452	21ur-5355	IV	15532638	15532658	-1	0.794638	1.01739	0	1.46973	0	2.22925	1.20762
WBGene00046453	21ur-5040	IV	14635051	14635071	-1	#N/A	#N/A	0	0	0	0	0
WBGene00046454	21ur-1439	IV	13612687	13612707	1	0.0166238	-3.50175	11.3035	22.046	16.574	0	2.41524
WBGene00046455	21ur-156	IV	15592496	15592516	-1	0.00262482	0.952222	144.12	174.898	118.78	278.656	292.244
WBGene00046456	21ur-234	IV	14681084	14681104	1	0.114105	2.16638	0	4.40919	0	13.3755	6.03809
WBGene00046457	21ur-4951	IV	13828642	13828662	1	1.36891e-06	1.64934	53.6917	72.0168	35.9103	160.506	188.388
WBGene00046458	21ur-753	IV	15793319	15793339	1	0.0118464	-5.13688	5.65176	19.1065	5.52467	0	0
WBGene00046459	21ur-5280	IV	16529118	16529138	-1	0.913471	-1.47513	2.82588	0	0	0	0
WBGene00046460	21ur-2847	IV	5213742	5213762	1	0.00286262	-3.55908	48.04	11.7578	30.3857	4.45849	1.20762
WBGene00046461	21ur-2142	IV	16387132	16387152	1	0.630594	0.686015	8.47764	1.46973	5.52467	8.91698	6.03809
WBGene00046462	21ur-4554	IV	14502715	14502735	-1	0.0496996	-0.381668	4453.59	5210.2	4740.16	3624.75	3748.45
WBGene00046463	21ur-83	IV	5979490	5979510	1	0.506045	0.545594	16.9553	33.8038	16.574	46.8142	24.1524
WBGene00046464	21ur-1768	IV	15664760	15664780	-1	0.0103585	-5.00413	8.47764	11.7578	8.287	0	0
WBGene00046465	21ur-871	IV	15314222	15314242	1	0.650903	1.37769	0	2.93946	0	4.45849	2.41524
WBGene00046466	21ur-158	IV	13807551	13807571	1	1	0	0	0	0	0	0
WBGene00046467	21ur-1494	IV	16887948	16887968	-1	0.0154025	4.07768	0	0	0	6.68774	7.24571
WBGene00046468	21ur-2203	IV	14011651	14011671	1	0.0471997	-1.36004	25.4329	23.5157	38.6727	13.3755	9.66094
WBGene00046469	21ur-1141	IV	13842496	13842516	-1	0.893956	1.02181	0	0	2.76233	2.22925	1.20762
WBGene00046470	21ur-4814	IV	15098667	15098687	1	0.00278109	0.859134	268.459	301.295	232.036	403.494	566.373
WBGene00046471	21ur-115	IV	16909225	16909245	-1	0.00142005	2.171	2.82588	8.81839	8.287	35.6679	28.9828
WBGene00046472	21ur-4852	IV	15267467	15267487	1	0.0907922	0.900715	39.5623	24.9854	22.0987	51.2727	54.3428
WBGene00046473	21ur-2731	IV	15922059	15922079	-1	0.00104133	-5.91467	16.9553	20.5762	16.574	0	0
WBGene00046474	21ur-2169	IV	16449251	16449271	-1	0.97873	0.868421	0	0	0	0	1.20762
WBGene00046475	21ur-4430	IV	6039092	6039112	1	0.184407	2.86921	0	0	0	2.22925	3.62285
WBGene00046476	21ur-1163	IV	5499090	5499110	1	0.595031	-3.9385	8.47764	0	5.52467	0	0
WBGene00046477	21ur-2396	IV	15229392	15229412	-1	0.8794	-1.46718	0	0	2.76233	0	0
WBGene00046478	21ur-905	IV	5141919	5141939	-1	0.620208	-1.35912	0	2.93946	8.287	0	2.41524
WBGene00046479	21ur-5125	IV	15864621	15864641	-1	0.000372398	-6.23881	22.6071	23.5157	22.0987	0	0
WBGene00046480	21ur-5361	IV	14049246	14049266	1	0.169865	1.73929	0	1.46973	11.0493	13.3755	12.0762
WBGene00046481	21ur-3075	IV	16990872	16990892	1	0.835048	-1.45774	0	0	2.76233	0	0
WBGene00046482	21ur-97	IV	5952891	5952911	-1	0.00127316	-5.67763	19.7812	17.6368	8.287	0	0
WBGene00046483	21ur-4349	IV	14589710	14589730	-1	1.2276e-08	-4.61951	115.861	92.5931	71.8207	0	6.03809
WBGene00046484	21ur-3812	IV	16985629	16985649	1	0.135494	-3.72216	2.82588	1.46973	8.287	0	0
WBGene00046485	21ur-1976	IV	16044323	16044343	1	0.651673	-2.56411	2.82588	0	2.76233	0	0
WBGene00046486	21ur-561	IV	15659478	15659498	-1	0.97873	0.86882	0	0	0	0	1.20762
WBGene00046487	21ur-4518	IV	14832270	14832290	1	0.0553029	-2.86934	14.1294	8.81839	11.0493	0	2.41524
WBGene00046488	21ur-351	IV	14646740	14646760	-1	1	0	0	0	0	0	0
WBGene00046489	21ur-2187	IV	15273246	15273266	-1	3.08162e-06	-2.01556	121.513	77.8958	132.592	28.9802	25.36
WBGene00046490	21ur-4475	IV	16563995	16564015	-1	0.00472304	0.779048	166.727	132.276	107.731	225.154	237.901
WBGene00046491	21ur-1317	IV	14269698	14269718	1	0.0816242	0.820302	48.04	33.8038	60.7713	113.692	54.3428
WBGene00046492	21ur-876	IV	15965746	15965766	-1	0.766954	0.602642	2.82588	7.34866	0	4.45849	7.24571
WBGene00046493	21ur-1996	IV	15590012	15590032	-1	1	0	0	0	0	0	0
WBGene00046494	21ur-4824	IV	14811539	14811559	-1	1	0	0	0	0	0	0
WBGene00046495	21ur-765	IV	16459561	16459581	-1	0.000274956	-0.914214	412.579	620.227	629.812	249.676	335.718
WBGene00046496	21ur-4253	IV	5418442	5418462	-1	0.0145919	1.09004	56.5176	92.5931	46.9597	129.296	155.783
WBGene00046497	21ur-3346	IV	14087433	14087453	-1	0.0876423	-2.6464	11.3035	10.2881	8.287	2.22925	1.20762
WBGene00046498	21ur-3866	IV	14289900	14289920	-1	7.32181e-07	-1.68862	141.294	127.867	146.404	46.8142	39.8514
WBGene00046499	21ur-3052	IV	14960988	14961008	1	0.0202454	1.03296	25.4329	27.9249	35.9103	55.7311	64.0038
WBGene00046500	21ur-396	IV	15137752	15137772	1	0.0738367	1.46105	8.47764	10.2881	5.52467	35.6679	13.2838
WBGene00046501	21ur-4401	IV	16696722	16696742	1	0.125478	2.55904	0	0	5.52467	11.1462	7.24571
WBGene00046502	21ur-4310	IV	15957046	15957066	-1	8.79032e-18	-6.10048	310.847	364.493	273.471	2.22925	6.03809
WBGene00046503	21ur-25	IV	14891432	14891452	1	0.0285999	-0.557804	1056.88	1011.18	986.153	744.568	641.245
WBGene00046504	21ur-2355	IV	15867089	15867109	-1	0.869731	0.290786	8.47764	7.34866	60.7713	37.8972	22.9447
WBGene00046505	21ur-1775	IV	14731632	14731652	-1	0.913471	-1.47484	2.82588	0	0	0	0
WBGene00046506	21ur-1726	IV	16096237	16096257	-1	0.797492	-1.44961	0	0	2.76233	0	0
WBGene00046507	21ur-204	IV	14856606	14856626	-1	1	0	0	0	0	0	0
WBGene00046508	21ur-2708	IV	15872575	15872595	-1	0.396926	-0.419926	81.9506	105.821	60.7713	75.7944	53.1352
WBGene00046509	21ur-718	IV	5171322	5171342	-1	0.000364702	-5.75667	48.04	42.6222	38.6727	0	1.20762
WBGene00046510	21ur-5088	IV	16886580	16886600	1	1.74182e-11	-5.0002	146.946	111.7	121.543	4.45849	3.62285
WBGene00046511	21ur-5074	IV	5771392	5771412	-1	0.229846	-2.93854	2.82588	4.40919	11.0493	0	1.20762
WBGene00046512	21ur-4359	IV	16562712	16562732	-1	0.446055	0.818583	8.47764	5.87892	2.76233	8.91698	10.8686
WBGene00046513	21ur-9	IV	14403686	14403706	1	2.07074e-05	1.33596	48.04	92.5931	58.009	156.047	190.804
WBGene00046514	21ur-2087	IV	6991825	6991845	-1	0.000320038	-3.30551	50.8659	42.6222	19.3363	2.22925	4.83047
WBGene00046515	21ur-3136	IV	15811496	15811516	-1	0.655358	-1.11283	0	14.6973	0	4.45849	1.20762
WBGene00046516	21ur-212	IV	16794922	16794942	1	0.776072	0.307281	25.4329	14.6973	22.0987	33.4387	18.1143
WBGene00046517	21ur-5064	IV	17037586	17037606	1	0.000160905	-6.49785	36.7365	14.6973	33.148	0	0
WBGene00046518	21ur-1461	IV	15923720	15923740	1	2.97038e-05	-5.18712	45.2141	51.4406	71.8207	0	2.41524
WBGene00046519	21ur-3531	IV	13956059	13956079	-1	0.00209385	2.29397	2.82588	8.81839	2.76233	33.4387	22.9447
WBGene00046520	21ur-4566	IV	14534557	14534577	1	0.000624551	-5.98263	14.1294	20.5762	22.0987	0	0
WBGene00046521	21ur-3755	IV	17154907	17154927	1	0.0283402	-1.68104	25.4329	32.3341	22.0987	6.68774	9.66094
WBGene00046522	21ur-5324	IV	5106850	5106870	-1	1.3392e-06	-7.85932	87.6023	86.7141	33.148	0	0
WBGene00046523	21ur-4766	IV	15281916	15281936	1	0.595031	1.4198	2.82588	0	0	0	3.62285
WBGene00046524	21ur-823	IV	13945668	13945688	1	0.000161295	1.35548	53.6917	27.9249	35.9103	107.004	86.9485
WBGene00046525	21ur-3001	IV	14683913	14683933	-1	1	0	0	0	0	0	0
WBGene00046526	21ur-1326	IV	14343120	14343140	1	2.53861e-12	-2.85658	3891.24	3934.47	2748.52	309.865	659.359
WBGene00046527	21ur-4795	IV	14367228	14367248	-1	3.79483e-16	-7.31318	406.927	365.963	356.341	4.45849	1.20762
WBGene00046528	21ur-1581	IV	14372539	14372559	1	0.00217128	-0.864819	141.294	116.109	129.83	73.5651	67.6266
WBGene00046529	21ur-1465	IV	16462203	16462223	1	0.436626	-2.42761	0	0	5.52467	0	0
WBGene00046530	21ur-5175	IV	6075215	6075235	-1	0.0698321	-2.27183	14.1294	11.7578	19.3363	2.22925	3.62285
WBGene00046531	21ur-699	IV	14275852	14275872	1	0.803505	1.64547	0	0	0	0	2.41524
WBGene00046532	21ur-1585	IV	16003007	16003027	1	2.90264e-05	-3.98437	53.6917	63.1984	27.6233	2.22925	3.62285
WBGene00046533	21ur-3089	IV	5747179	5747199	-1	0.0384073	-3.84524	11.3035	7.34866	16.574	0	1.20762
WBGene00046534	21ur-807	IV	15866991	15867011	1	6.82455e-16	1.53266	378.668	343.917	240.323	942.971	922.62
WBGene00046535	21ur-1127	IV	13826078	13826098	1	0.834165	-0.431266	11.3035	7.34866	5.52467	2.22925	8.45333
WBGene00046536	21ur-2153	IV	14340303	14340323	-1	0.226931	2.80216	0	0	0	6.68774	0
WBGene00046537	21ur-4574	IV	14604654	14604674	1	0.182938	-3.36318	5.65176	1.46973	2.76233	0	0
WBGene00046538	21ur-1019	IV	14224018	14224038	-1	0.300474	-2.11079	8.47764	7.34866	2.76233	0	2.41524
WBGene00046539	21ur-3381	IV	16367493	16367513	1	0.0195967	-0.635535	3492.79	3431.82	3828.59	2070.97	2539.62
WBGene00046540	21ur-3819	IV	15410497	15410517	1	0.000175444	0.720971	2266.36	2419.18	2477.81	3774.11	4096.24
WBGene00046541	21ur-2417	IV	5803166	5803186	-1	1	0.00997625	0	1.46973	11.0493	8.91698	0
WBGene00046542	21ur-4463	IV	14830661	14830681	1	0.792929	-1.44861	0	0	2.76233	0	0
WBGene00046543	21ur-619	IV	14982801	14982821	-1	0.349562	0.672984	5.65176	17.6368	22.0987	28.9802	21.7371
WBGene00046544	21ur-1489	IV	15793080	15793100	1	0.875152	1.20041	0	0	0	2.22925	0
WBGene00046545	21ur-10	IV	16888197	16888217	-1	0.00157378	1.08121	90.4282	70.5471	35.9103	164.964	118.347
WBGene00046546	21ur-583	IV	14560115	14560135	1	0.01294	-4.40164	14.1294	19.1065	16.574	0	1.20762
WBGene00046547	21ur-1688	IV	5124603	5124623	-1	0.00130245	1.45437	67.8212	36.7433	80.1077	211.778	119.554
WBGene00046548	21ur-2743	IV	14230405	14230425	-1	0.736178	-1.43735	0	0	2.76233	0	0
WBGene00046549	21ur-2149	IV	14297081	14297101	1	0.221471	1.17717	5.65176	5.87892	13.8117	15.6047	20.5295
WBGene00046550	21ur-4356	IV	14600534	14600554	-1	0.00254017	1.05234	56.5176	80.8352	52.4843	144.901	126.8
WBGene00046551	21ur-2090	IV	13825040	13825060	1	0.0667592	1.04588	19.7812	22.046	11.0493	22.2925	49.5123
WBGene00046552	21ur-3850	IV	15360777	15360797	1	0.16308	0.403944	220.419	170.489	138.117	247.446	219.786
WBGene00046553	21ur-1368	IV	16023875	16023895	-1	0.923981	0.117621	56.5176	61.7287	52.4843	86.9406	41.059
WBGene00046554	21ur-1693	IV	16467302	16467322	-1	7.23443e-21	-3.6545	406.927	432.101	259.659	31.2094	27.7752
WBGene00046555	21ur-14	IV	16025550	16025570	-1	1.24983e-05	1.15056	118.687	124.927	91.157	209.549	286.205
WBGene00046556	21ur-3338	IV	13600849	13600869	1	0.890716	-0.444204	8.47764	4.40919	2.76233	8.91698	0
WBGene00046557	21ur-4736	IV	5594652	5594672	-1	0.354815	-2.74244	0	2.93946	2.76233	0	0
WBGene00046558	21ur-1746	IV	17210623	17210643	-1	0.902138	0.896539	0	0	0	0	1.20762
WBGene00046559	21ur-4068	IV	6048982	6049002	-1	0.000994658	-5.29983	48.04	29.3946	19.3363	2.22925	0
WBGene00046560	21ur-2143	IV	15179130	15179150	-1	0.826862	-1.399	0	1.46973	0	0	0
WBGene00046561	21ur-3749	IV	15084091	15084111	1	0.841995	0.400309	0	8.81839	11.0493	13.3755	6.03809
WBGene00046562	21ur-462	IV	14042459	14042479	-1	0.0259337	0.948573	16.9553	57.3195	41.435	69.1066	86.9485
WBGene00046563	21ur-4142	IV	13715593	13715613	-1	1	0	0	0	0	0	0
WBGene00046564	21ur-1600	IV	13646753	13646773	1	0.917209	0.88456	0	0	0	0	1.20762
WBGene00046565	21ur-1195	IV	15268510	15268530	-1	8.25054e-05	-6.03634	59.3435	57.3195	41.435	2.22925	0
WBGene00046566	21ur-3772	IV	14830744	14830764	1	1	0	0	0	0	0	0
WBGene00046567	21ur-937	IV	16612113	16612133	-1	0.0301191	0.650524	887.327	912.703	745.83	1339.78	1327.17
WBGene00046568	21ur-4380	IV	16192625	16192645	-1	0.914588	0.0710296	146.946	158.731	223.749	158.276	205.295
WBGene00046569	21ur-4805	IV	15309942	15309962	1	0.00153622	-2.27826	22.6071	38.213	44.1973	11.1462	4.83047
WBGene00046570	21ur-1715	IV	13759730	13759750	-1	0.873373	0.820303	0	1.46973	0	0	2.41524
WBGene00046571	21ur-4610	IV	16104395	16104415	1	0.783439	1.65649	0	0	0	0	2.41524
WBGene00046572	21ur-4027	IV	14862211	14862231	-1	2.49055e-08	-2.08771	124.339	245.445	182.314	44.5849	43.4743
WBGene00046573	21ur-4289	IV	15898909	15898929	-1	0.809437	0.518492	0	13.2276	2.76233	15.6047	3.62285
WBGene00046574	21ur-266	IV	15845754	15845774	1	0.797341	-1.44958	0	0	2.76233	0	0
WBGene00046575	21ur-4086	IV	14364038	14364058	1	4.38992e-06	1.51645	56.5176	39.6827	41.435	138.213	120.762
WBGene00046576	21ur-680	IV	16164877	16164897	1	0.871938	0.210866	19.7812	17.6368	16.574	24.5217	18.1143
WBGene00046577	21ur-4193	IV	16211364	16211384	1	0.0130472	-3.49452	25.4329	13.2276	13.8117	0	2.41524
WBGene00046578	21ur-4464	IV	14503331	14503351	1	0.83899	-0.891405	0	0	5.52467	2.22925	0
WBGene00046579	21ur-4014	IV	15137220	15137240	-1	0.00262024	2.00822	8.47764	8.81839	5.52467	26.751	35.0209
WBGene00046580	21ur-4244	IV	15371967	15371987	-1	0.43513	-2.44359	5.65176	0	0	0	0
WBGene00046581	21ur-1201	IV	16357434	16357454	1	0.98325	0.142095	8.47764	8.81839	2.76233	6.68774	8.45333
WBGene00046582	21ur-973	IV	14046590	14046610	1	#N/A	#N/A	0	0	0	0	0
WBGene00046583	21ur-2809	IV	14745714	14745734	1	9.09676e-06	1.48545	104.558	117.578	55.2467	185.027	336.925
WBGene00046584	21ur-205	IV	14506800	14506820	-1	3.62878e-05	-0.939347	726.252	655.5	814.888	354.45	404.552
WBGene00046585	21ur-1545	IV	16593501	16593521	1	8.22883e-22	-2.76118	907.108	981.78	740.305	91.3991	161.821
WBGene00046586	21ur-4372	IV	16016527	16016547	-1	0.0140942	0.822994	146.946	169.019	113.256	254.134	257.223
WBGene00046587	21ur-2040	IV	14561431	14561451	1	0.875119	-1.39531	0	1.46973	0	0	0
WBGene00046588	21ur-3215	IV	15537031	15537051	1	0.969342	0.0449014	1121.87	1300.71	1328.68	1132.46	1444.31
WBGene00046589	21ur-2999	IV	5719805	5719825	1	1.74461e-21	-3.45047	884.501	1064.09	745.83	66.8774	95.4018
WBGene00046590	21ur-1663	IV	5605864	5605884	1	0.320608	2.29318	2.82588	0	0	4.45849	3.62285
WBGene00046591	21ur-3157	IV	14183190	14183210	-1	6.74479e-07	-4.43043	87.6023	69.0774	44.1973	2.22925	3.62285
WBGene00046592	21ur-2525	IV	15342077	15342097	1	1.27827e-10	-1.98931	183.682	208.702	154.691	40.1264	50.72
WBGene00046593	21ur-4443	IV	14592575	14592595	1	0.163033	-0.888254	36.7365	30.8644	22.0987	13.3755	18.1143
WBGene00046594	21ur-3902	IV	15348127	15348147	1	0.902228	-0.0985943	231.722	273.37	193.363	260.822	181.143
WBGene00046595	21ur-4109	IV	6083760	6083780	1	1	0	0	0	0	0	0
WBGene00046596	21ur-1412	IV	15122730	15122750	-1	1.42172e-08	1.39344	180.856	191.065	124.305	465.912	415.421
WBGene00046597	21ur-1508	IV	15535733	15535753	1	0.219999	-2.88563	2.82588	2.93946	13.8117	2.22925	0
WBGene00046598	21ur-2555	IV	16616334	16616354	1	1.31399e-32	-6.35022	712.122	886.248	665.722	6.68774	10.8686
WBGene00046599	21ur-4015	IV	16221710	16221730	-1	0.128079	-3.82599	5.65176	4.40919	2.76233	0	0
WBGene00046600	21ur-4062	IV	15916585	15916605	-1	3.1339e-10	-5.93177	144.12	166.08	116.018	2.22925	2.41524
WBGene00046601	21ur-397	IV	16831313	16831333	-1	0.825477	0.385373	0	11.7578	5.52467	11.1462	7.24571
WBGene00046602	21ur-2860	IV	16684683	16684703	-1	2.08428e-13	-4.60401	138.468	170.489	140.879	4.45849	7.24571
WBGene00046603	21ur-2595	IV	14819461	14819481	1	0.0270774	-4.1695	11.3035	19.1065	13.8117	2.22925	0
WBGene00046604	21ur-2996	IV	5268540	5268560	-1	#N/A	#N/A	0	0	0	0	0
WBGene00046605	21ur-4823	IV	14817796	14817816	1	0.152796	0.717512	22.6071	24.9854	30.3857	31.2094	50.72
WBGene00046606	21ur-4329	IV	15314092	15314112	1	0.103533	0.741583	56.5176	45.5617	33.148	93.6283	60.3809
WBGene00046607	21ur-2944	IV	13906388	13906408	1	2.63597e-05	1.29935	166.727	220.46	270.709	599.667	483.047
WBGene00046608	21ur-2501	IV	6130039	6130059	-1	0.383952	0.496023	31.0847	33.8038	49.722	62.4189	45.8895
WBGene00046609	21ur-5299	IV	16086370	16086390	-1	0.0445329	2.4266	5.65176	1.46973	0	11.1462	12.0762
WBGene00046610	21ur-2995	IV	14122316	14122336	-1	1.96943e-11	-3.66466	113.035	92.5931	129.83	11.1462	7.24571
WBGene00046611	21ur-2081	IV	5194049	5194069	-1	0.029813	0.764849	110.209	146.973	160.215	292.031	187.181
WBGene00046612	21ur-3076	IV	13962739	13962759	-1	0.914588	-1.39229	0	1.46973	0	0	0
WBGene00046613	21ur-1430	IV	5566428	5566448	1	0.897061	0.14161	11119.8	13359.9	7334	12162.8	11236.9
WBGene00046614	21ur-4150	IV	16818302	16818322	1	0.00314463	-5.33212	16.9553	7.34866	13.8117	0	0
WBGene00046615	21ur-5343	IV	14658508	14658528	-1	2.93863e-10	-5.34785	121.513	136.685	127.067	4.45849	2.41524
WBGene00046616	21ur-2418	IV	15583405	15583425	-1	0.302956	0.812964	14.1294	8.81839	16.574	11.1462	30.1905
WBGene00046617	21ur-3723	IV	14398349	14398369	-1	0.45116	0.519512	22.6071	19.1065	24.861	24.5217	36.2285
WBGene00046618	21ur-3479	IV	14609436	14609456	-1	0.000161102	-5.97541	48.04	38.213	69.0583	2.22925	0
WBGene00046619	21ur-3712	IV	15367508	15367528	-1	0.135386	-1.81754	19.7812	7.34866	16.574	4.45849	3.62285
WBGene00046620	21ur-1691	IV	13706619	13706639	-1	0.0359096	0.690747	203.463	142.564	110.493	198.403	286.205
WBGene00046621	21ur-3543	IV	14312672	14312692	1	0.0193205	-4.82182	5.65176	8.81839	11.0493	0	0
WBGene00046622	21ur-726	IV	14458526	14458546	-1	1.23327e-16	1.51296	373.016	329.22	353.579	889.469	1103.76
WBGene00046623	21ur-3854	IV	15565137	15565157	-1	0.0669051	1.20752	8.47764	14.6973	16.574	40.1264	24.1524
WBGene00046624	21ur-517	IV	15567476	15567496	-1	0.000323305	-3.74255	36.7365	32.3341	30.3857	6.68774	0
WBGene00046625	21ur-728	IV	14138784	14138804	-1	0.000134955	-6.47339	31.0847	29.3946	19.3363	0	0
WBGene00046626	21ur-5397	IV	16113213	16113233	-1	6.34523e-07	1.30791	203.463	180.777	143.641	370.055	497.539
WBGene00046627	21ur-2802	IV	14993066	14993086	1	0.00753402	-5.35124	22.6071	11.7578	2.76233	0	0
WBGene00046628	21ur-2353	IV	14482080	14482100	-1	0.480319	-0.721923	22.6071	8.81839	13.8117	8.91698	8.45333
WBGene00046629	21ur-2084	IV	14288864	14288884	1	0.920772	0.312569	16.9553	0	2.76233	13.3755	2.41524
WBGene00046630	21ur-1825	IV	17052315	17052335	-1	0.107964	0.799736	132.816	198.414	69.0583	207.32	263.261
WBGene00046631	21ur-515	IV	15487158	15487178	-1	2.64496e-05	-5.01034	64.9953	47.0314	41.435	2.22925	1.20762
WBGene00046632	21ur-3963	IV	16726444	16726464	-1	0.314686	-0.502002	36.7365	52.9103	52.4843	28.9802	37.4362
WBGene00046633	21ur-2487	IV	16256895	16256915	-1	0.887572	0.117094	59.3435	88.1839	93.9193	113.692	67.6266
WBGene00046634	21ur-1785	IV	13714108	13714128	1	0.984892	0.323061	0	2.93946	0	2.22925	1.20762
WBGene00046635	21ur-5016	IV	5854809	5854829	-1	0.814821	-0.953227	2.82588	0	2.76233	0	1.20762
WBGene00046636	21ur-4153	IV	4889933	4889953	-1	0.865217	0.629979	2.82588	0	2.76233	2.22925	2.41524
WBGene00046637	21ur-3258	IV	13833653	13833673	1	0.869731	-1.94156	0	2.93946	0	0	0
WBGene00046638	21ur-833	IV	15296404	15296424	1	5.37865e-18	-5.13651	237.374	208.702	218.224	6.68774	6.03809
WBGene00046639	21ur-3332	IV	17161772	17161792	-1	0.348654	-1.25139	5.65176	8.81839	33.148	13.3755	1.20762
WBGene00046640	21ur-2811	IV	14028400	14028420	-1	0.073443	-2.68194	8.47764	8.81839	13.8117	2.22925	1.20762
WBGene00046641	21ur-4906	IV	15610508	15610528	-1	0.0104766	1.38989	16.9553	10.2881	19.3363	37.8972	38.6438
WBGene00046642	21ur-3382	IV	14459648	14459668	1	0.131437	1.57244	0	4.40919	11.0493	11.1462	18.1143
WBGene00046643	21ur-4222	IV	15592988	15593008	1	0.00241708	2.57162	8.47764	2.93946	2.76233	26.751	25.36
WBGene00046644	21ur-2216	IV	14606071	14606091	-1	0.0735983	3.49205	0	0	0	4.45849	4.83047
WBGene00046645	21ur-3208	IV	15125779	15125799	-1	2.62442e-06	-5.54259	93.2541	67.6076	60.7713	2.22925	1.20762
WBGene00046646	21ur-508	IV	15587310	15587330	-1	8.23689e-37	-5.05313	545.395	436.51	494.458	11.1462	16.9067
WBGene00046647	21ur-1836	IV	15934779	15934799	1	1.34641e-28	-7.22048	709.296	683.425	743.068	8.91698	2.41524
WBGene00046648	21ur-3389	IV	4849314	4849334	1	0.919322	1.3263	0	0	0	2.22925	0
WBGene00046649	21ur-2	IV	16435595	16435615	-1	6.91661e-06	-1.72149	118.687	145.503	198.888	44.5849	48.3047
WBGene00046650	21ur-1925	IV	13955566	13955586	1	0.359992	-1.76732	0	7.34866	8.287	2.22925	1.20762
WBGene00046651	21ur-2245	IV	6162942	6162962	1	3.88986e-12	-2.35644	265.633	311.583	284.52	44.5849	65.2114
WBGene00046652	21ur-187	IV	5815839	5815859	1	1	0	0	0	0	0	0
WBGene00046653	21ur-3546	IV	15919055	15919075	1	0.000974849	-2.72392	59.3435	39.6827	16.574	0	9.66094
WBGene00046654	21ur-3780	IV	6025772	6025792	1	0.880944	0.907124	0	0	0	0	1.20762
WBGene00046655	21ur-182	IV	15928268	15928288	1	0.104481	-1.0571	28.2588	42.6222	30.3857	11.1462	20.5295
WBGene00046656	21ur-1556	IV	5161675	5161695	-1	0.416857	0.424623	64.9953	47.0314	27.6233	46.8142	74.8723
WBGene00046657	21ur-3481	IV	14554443	14554463	-1	0.947776	0.170533	8.47764	13.2276	2.76233	8.91698	10.8686
WBGene00046658	21ur-4771	IV	5918874	5918894	1	0.133591	1.51187	8.47764	5.87892	0	20.0632	9.66094
WBGene00046659	21ur-1987	IV	15834128	15834148	-1	0.0493298	2.42162	5.65176	0	2.76233	20.0632	6.03809
WBGene00046660	21ur-5424	IV	15772780	15772800	1	5.77174e-05	-6.23076	28.2588	83.7747	63.5337	0	1.20762
WBGene00046661	21ur-4494	IV	15780188	15780208	-1	0.969698	0.197246	11.3035	2.93946	2.76233	11.1462	2.41524
WBGene00046662	21ur-4261	IV	16135135	16135155	1	0.200355	2.53985	0	1.46973	0	4.45849	4.83047
WBGene00046663	21ur-885	IV	13904779	13904799	1	0.0252784	-4.61723	5.65176	10.2881	5.52467	0	0
WBGene00046664	21ur-1093	IV	16604058	16604078	1	0.039097	-4.3176	2.82588	8.81839	5.52467	0	0
WBGene00046665	21ur-4620	IV	6066041	6066061	-1	1.97806e-07	-4.47537	59.3435	72.0168	82.87	6.68774	1.20762
WBGene00046666	21ur-4277	IV	16839036	16839056	-1	0.190133	0.726226	42.3882	26.4552	13.8117	49.0434	42.2666
WBGene00046667	21ur-3778	IV	17194749	17194769	-1	#N/A	#N/A	0	0	0	0	0
WBGene00046668	21ur-4944	IV	13714515	13714535	1	1	0	0	0	0	0	0
WBGene00046669	21ur-3673	IV	14992863	14992883	1	0.00012979	-4.1438	28.2588	51.4406	38.6727	0	3.62285
WBGene00046670	21ur-5395	IV	16607787	16607807	-1	5.58598e-12	1.42015	146.946	127.867	118.78	352.221	347.794
WBGene00046671	21ur-3566	IV	16051924	16051944	-1	0.88766	1.23499	0	0	0	2.22925	0
WBGene00046672	21ur-1252	IV	15549417	15549437	-1	0.195422	2.86656	0	0	0	2.22925	3.62285
WBGene00046673	21ur-4099	IV	5600776	5600796	-1	0.0833801	1.30337	5.65176	11.7578	2.76233	20.0632	18.1143
WBGene00046674	21ur-3404	IV	17015530	17015550	-1	0.413085	-2.9266	2.82588	1.46973	2.76233	0	0
WBGene00046675	21ur-3769	IV	5113614	5113634	1	0.0402811	3.76579	0	0	0	6.68774	4.83047
WBGene00046676	21ur-4203	IV	15399073	15399093	-1	4.30698e-09	-6.72511	132.816	151.382	209.937	0	2.41524
WBGene00046677	21ur-2228	IV	16019139	16019159	1	0.737564	-1.18234	0	4.40919	0	2.22925	0
WBGene00046678	21ur-4936	IV	14692106	14692126	1	7.2885e-05	-3.76584	33.9106	47.0314	52.4843	6.68774	1.20762
WBGene00046679	21ur-1316	IV	17049689	17049709	1	0.0313309	3.50962	2.82588	0	0	13.3755	6.03809
WBGene00046680	21ur-57	IV	17217670	17217690	-1	2.14698e-12	-3.6075	158.249	167.549	132.592	13.3755	12.0762
WBGene00046681	21ur-4860	IV	14038775	14038795	-1	0.020063	1.24881	16.9553	16.167	19.3363	49.0434	35.0209
WBGene00046682	21ur-2109	IV	16564215	16564235	-1	3.95172e-17	-2.50329	361.713	377.721	533.13	75.7944	73.6647
WBGene00046683	21ur-3369	IV	16178567	16178587	1	0.888696	-1.46951	0	0	2.76233	0	0
WBGene00046684	21ur-797	IV	15795112	15795132	-1	0.000375702	2.32781	2.82588	8.81839	8.287	37.8972	33.8133
WBGene00046685	21ur-2403	IV	5976934	5976954	-1	0.816678	-2.22824	0	1.46973	2.76233	0	0
WBGene00046686	21ur-1066	IV	16669345	16669365	-1	0.00364118	4.81999	0	0	0	15.6047	8.45333
WBGene00046687	21ur-3049	IV	14176971	14176991	-1	3.77435e-07	-3.13798	67.8212	64.6682	91.157	4.45849	10.8686
WBGene00046688	21ur-5193	IV	16534326	16534346	-1	0.706666	0.89549	0	1.46973	8.287	2.22925	8.45333
WBGene00046689	21ur-4331	IV	15345677	15345697	1	1	0	0	0	0	0	0
WBGene00046690	21ur-256	IV	16716154	16716174	1	0.952851	-0.186546	28.2588	4.40919	2.76233	11.1462	8.45333
WBGene00046691	21ur-4654	IV	14417634	14417654	1	0.495187	-0.880664	11.3035	5.87892	16.574	8.91698	3.62285
WBGene00046692	21ur-2123	IV	14713082	14713102	1	0.00344353	-0.800273	1025.79	1265.44	1254.1	557.311	795.82
WBGene00046693	21ur-3249	IV	15166094	15166114	1	0.085807	-1.20093	42.3882	23.5157	27.6233	20.0632	8.45333
WBGene00046694	21ur-5138	IV	14620182	14620202	1	0.842118	1.09518	0	0	0	2.22925	0
WBGene00046695	21ur-2096	IV	15090048	15090068	1	0.000256354	1.22715	50.8659	39.6827	52.4843	109.233	108.686
WBGene00046696	21ur-964	IV	16130415	16130435	1	0.529195	-1.41272	8.47764	4.40919	0	2.22925	1.20762
WBGene00046697	21ur-3410	IV	14273943	14273963	1	0.00813116	-5.08923	14.1294	8.81839	8.287	0	0
WBGene00046698	21ur-328	IV	16613398	16613418	-1	0.756864	-1.97689	0	2.93946	0	0	0
WBGene00046699	21ur-1396	IV	15180209	15180229	1	0.709433	1.18502	0	0	5.52467	6.68774	1.20762
WBGene00046700	21ur-1798	IV	16635030	16635050	1	1.58486e-05	-3.42965	45.2141	45.5617	69.0583	8.91698	2.41524
WBGene00046701	21ur-1171	IV	16747881	16747901	1	0.0018951	-5.70311	16.9553	11.7578	19.3363	0	0
WBGene00046702	21ur-3424	IV	16381897	16381917	1	0.00217858	-5.5039	19.7812	13.2276	8.287	0	0
WBGene00046703	21ur-897	IV	15351850	15351870	1	1.16929e-19	-7.33354	339.106	468.844	720.969	4.45849	2.41524
WBGene00046704	21ur-666	IV	13945623	13945643	1	0.674205	0.639226	11.3035	4.40919	2.76233	13.3755	6.03809
WBGene00046705	21ur-5045	IV	16540737	16540757	1	0.330953	0.949103	8.47764	2.93946	13.8117	24.5217	7.24571
WBGene00046706	21ur-2940	IV	14162140	14162160	1	0.200436	1.18279	11.3035	4.40919	8.287	8.91698	22.9447
WBGene00046707	21ur-1948	IV	5865880	5865900	-1	1	0.245774	0	1.46973	0	2.22925	0
WBGene00046708	21ur-4092	IV	16691068	16691088	-1	0.411028	0.570889	16.9553	16.167	16.574	26.751	22.9447
WBGene00046709	21ur-2043	IV	14287833	14287853	-1	0.0394437	1.54299	16.9553	8.81839	8.287	35.6679	28.9828
WBGene00046710	21ur-1209	IV	15955708	15955728	-1	0.0167732	1.31456	22.6071	22.046	13.8117	57.9604	42.2666
WBGene00046711	21ur-3245	IV	15287986	15288006	1	1.87763e-22	-3.79228	350.409	385.07	254.135	28.9802	20.5295
WBGene00046712	21ur-1004	IV	6993931	6993951	-1	1	0	0	0	0	0	0
WBGene00046713	21ur-5197	IV	14748180	14748200	-1	0.00127241	0.819075	163.901	235.157	160.215	365.596	307.943
WBGene00046714	21ur-3254	IV	14852554	14852574	1	0.0759951	2.59366	2.82588	1.46973	0	8.91698	8.45333
WBGene00046715	21ur-843	IV	17184417	17184437	1	0.727896	-2.58424	2.82588	0	2.76233	0	0
WBGene00046716	21ur-2016	IV	16041601	16041621	-1	2.48653e-05	1.27691	248.678	343.917	301.094	604.126	842.917
WBGene00046717	21ur-4785	IV	15573892	15573912	1	1	-0.0113408	438.012	482.072	685.059	485.976	568.788
WBGene00046718	21ur-4667	IV	15487292	15487312	-1	0.164735	1.34674	14.1294	2.93946	5.52467	13.3755	20.5295
WBGene00046719	21ur-3472	IV	14441919	14441939	-1	0.0512246	-3.08716	16.9553	17.6368	5.52467	2.22925	1.20762
WBGene00046720	21ur-3217	IV	17190929	17190949	1	0.820252	-1.95632	0	2.93946	0	0	0
WBGene00046721	21ur-2513	IV	14615349	14615369	1	4.22392e-13	-6.0299	200.638	230.748	168.502	0	4.83047
WBGene00046722	21ur-4914	IV	15107123	15107143	-1	0.00472967	-4.83927	11.3035	16.167	44.1973	2.22925	0
WBGene00046723	21ur-2531	IV	15095301	15095321	1	0.641296	1.18488	0	2.93946	0	2.22925	3.62285
WBGene00046724	21ur-486	IV	16888988	16889008	-1	0.0857346	-1.79792	19.7812	17.6368	11.0493	4.45849	4.83047
WBGene00046725	21ur-4120	IV	15987662	15987682	1	0.00313838	-4.04205	19.7812	16.167	49.722	4.45849	0
WBGene00046726	21ur-2422	IV	13716652	13716672	1	0.00532222	-0.90837	96.08	110.23	91.157	55.7311	51.9276
WBGene00046727	21ur-3375	IV	15959629	15959649	1	0.855093	-0.11196	251.503	264.552	190.601	211.778	225.825
WBGene00046728	21ur-3977	IV	16635235	16635255	1	0.612556	0.264019	141.294	107.29	80.1077	173.881	94.1942
WBGene00046729	21ur-3629	IV	13725032	13725052	1	4.69412e-11	-9.56828	627.346	686.364	519.319	2.22925	0
WBGene00046730	21ur-224	IV	5861273	5861293	1	0.000234423	-1.66993	84.7764	73.4866	58.009	22.2925	22.9447
WBGene00046731	21ur-1030	IV	14533350	14533370	1	0.58034	0.724984	5.65176	11.7578	0	11.1462	10.8686
WBGene00046732	21ur-4591	IV	16207023	16207043	-1	2.38241e-17	-6.30767	296.718	340.978	281.758	2.22925	4.83047
WBGene00046733	21ur-372	IV	13646531	13646551	-1	0.0653034	1.18882	14.1294	14.6973	8.287	46.8142	15.699
WBGene00046734	21ur-298	IV	6381765	6381785	1	0.914588	-1.39196	0	1.46973	0	0	0
WBGene00046735	21ur-744	IV	15664507	15664527	-1	0.812912	0.115442	449.315	515.876	499.982	485.976	571.203
WBGene00046736	21ur-3465	IV	6166487	6166507	-1	0.802247	-1.45054	2.82588	0	0	0	0
WBGene00046737	21ur-4175	IV	4918437	4918457	1	0.834637	-0.779315	2.82588	7.34866	2.76233	4.45849	1.20762
WBGene00046738	21ur-2667	IV	15477978	15477998	1	2.66439e-05	-4.36881	76.2988	33.8038	38.6727	2.22925	2.41524
WBGene00046739	21ur-2470	IV	14044625	14044645	1	0.0104583	-4.91496	16.9553	5.87892	5.52467	0	0
WBGene00046740	21ur-1447	IV	16052166	16052186	-1	0.105529	-0.527543	531.266	642.273	499.982	316.553	455.272
WBGene00046741	21ur-1887	IV	16818305	16818325	1	0.00314463	-5.33212	16.9553	7.34866	13.8117	0	0
WBGene00046742	21ur-4643	IV	14315942	14315962	1	0.17687	1.13238	8.47764	10.2881	5.52467	22.2925	15.699
WBGene00046743	21ur-5271	IV	16103522	16103542	1	0.00728403	-1.99194	48.04	24.9854	27.6233	13.3755	4.83047
WBGene00046744	21ur-2411	IV	13624881	13624901	1	0.705651	-1.41069	0	1.46973	0	0	0
WBGene00046745	21ur-4974	IV	14104562	14104582	-1	1	-0.0156745	1042.75	1214	1201.62	1132.46	1149.65
WBGene00046746	21ur-3293	IV	16035819	16035839	1	0.796287	0.992586	2.82588	0	0	2.22925	1.20762
WBGene00046747	21ur-1263	IV	15271869	15271889	1	0.211181	-1.68072	8.47764	5.87892	16.574	2.22925	3.62285
WBGene00046748	21ur-5059	IV	15809339	15809359	-1	4.92489e-47	-6.0704	918.411	974.432	941.956	13.3755	14.4914
WBGene00046749	21ur-3224	IV	14431402	14431422	-1	0.000347748	1.1724	87.6023	139.624	69.0583	180.569	274.129
WBGene00046750	21ur-3604	IV	14750086	14750106	1	0.000530939	1.30963	98.9059	85.2444	30.3857	158.276	199.257
WBGene00046751	21ur-3578	IV	13995193	13995213	1	1	0	0	0	0	0	0
WBGene00046752	21ur-4398	IV	15974615	15974635	-1	0.000175393	1.87062	16.9553	24.9854	16.574	84.7113	65.2114
WBGene00046753	21ur-1180	IV	5824387	5824407	-1	0.411945	-0.36714	64.9953	67.6076	80.1077	60.1896	50.72
WBGene00046754	21ur-3657	IV	15569086	15569106	-1	0.0990105	0.530049	64.9953	70.5471	91.157	109.233	107.478
WBGene00046755	21ur-4054	IV	15623971	15623991	1	0.620208	1.70991	2.82588	0	0	4.45849	1.20762
WBGene00046756	21ur-114	IV	17203490	17203510	1	0.219807	-3.49607	2.82588	4.40919	2.76233	0	0
WBGene00046757	21ur-2882	IV	14644034	14644054	1	0.0259962	-1.83333	28.2588	35.2735	33.148	13.3755	6.03809
WBGene00046758	21ur-4748	IV	14494642	14494662	1	0.616475	-0.167704	921.237	989.129	881.184	784.695	871.9
WBGene00046759	21ur-531	IV	15334003	15334023	-1	8.79828e-08	1.44026	104.558	142.564	88.3947	247.446	368.324
WBGene00046760	21ur-2623	IV	16536115	16536135	-1	4.27544e-06	-1.27815	2515.03	2976.21	2704.32	1125.77	1127.92
WBGene00046761	21ur-5282	IV	5047836	5047856	-1	6.45112e-15	-3.75865	313.673	302.765	198.888	11.1462	26.5676
WBGene00046762	21ur-1513	IV	14702666	14702686	-1	1	0	0	0	0	0	0
WBGene00046763	21ur-140	IV	14391426	14391446	1	0.144604	0.965571	8.47764	22.046	24.861	46.8142	28.9828
WBGene00046764	21ur-126	IV	5927883	5927903	1	0.464694	-0.372823	87.6023	82.3049	71.8207	60.1896	64.0038
WBGene00046765	21ur-3337	IV	15542243	15542263	-1	0.0313625	-0.906518	62.1694	70.5471	63.5337	42.3557	30.1905
WBGene00046766	21ur-1028	IV	9132124	9132144	-1	0.903544	1.2686	0	0	0	2.22925	0
WBGene00046767	21ur-444	IV	15661813	15661833	1	2.57088e-16	1.40457	330.628	399.767	395.014	900.615	1088.06
WBGene00046768	21ur-1840	IV	6498732	6498752	1	1	0	0	0	0	0	0
WBGene00046769	21ur-3272	IV	16793446	16793466	-1	3.50901e-05	-1.16224	299.543	266.021	270.709	135.984	114.724
WBGene00046770	21ur-1651	IV	13906385	13906405	1	2.63597e-05	1.29935	166.727	220.46	270.709	599.667	483.047
WBGene00046771	21ur-2361	IV	15571743	15571763	1	0.661789	0.201489	313.673	252.794	278.996	338.845	307.943
WBGene00046772	21ur-1346	IV	14092027	14092047	-1	0.0453179	1.48369	8.47764	11.7578	8.287	37.8972	19.3219
WBGene00046773	21ur-453	IV	14998088	14998108	1	5.19764e-13	-1.94981	819.506	1403.59	1022.06	247.446	311.565
WBGene00046774	21ur-4722	IV	16522053	16522073	1	0.427062	-2.72922	2.82588	2.93946	0	0	0
WBGene00046775	21ur-2066	IV	15277255	15277275	-1	0.0294854	1.6461	5.65176	7.34866	11.0493	33.4387	18.1143
WBGene00046776	21ur-3653	IV	14575782	14575802	-1	1	0	0	0	0	0	0
WBGene00046777	21ur-189	IV	16178841	16178861	1	1	0.0498721	0	1.46973	11.0493	4.45849	3.62285
WBGene00046778	21ur-411	IV	14429515	14429535	1	0.747265	-1.98007	0	2.93946	0	0	0
WBGene00046779	21ur-4069	IV	15881160	15881180	1	0.000187393	-6.34315	36.7365	19.1065	19.3363	0	0
WBGene00046780	21ur-5224	IV	15106948	15106968	1	1	-0.0382488	5.65176	5.87892	2.76233	6.68774	3.62285
WBGene00046781	21ur-2614	IV	14244229	14244249	-1	0.000355856	-6.19923	14.1294	30.8644	19.3363	0	0
WBGene00046782	21ur-773	IV	15318201	15318221	-1	0.221964	0.768841	11.3035	17.6368	22.0987	24.5217	32.6057
WBGene00046783	21ur-47	IV	14383780	14383800	-1	8.23764e-08	1.1926	813.854	886.248	596.664	1696.46	1813.84
WBGene00046784	21ur-3681	IV	13988049	13988069	1	0.41855	-0.306748	84.7764	89.6536	102.206	73.5651	74.8723
WBGene00046785	21ur-664	IV	5970039	5970059	-1	1	0.14497	0	0	2.76233	2.22925	0
WBGene00046786	21ur-2992	IV	15240252	15240272	-1	0.0432231	-4.37865	8.47764	7.34866	2.76233	0	0
WBGene00046787	21ur-611	IV	16563807	16563827	-1	0.579308	-1.11971	0	4.40919	11.0493	2.22925	2.41524
WBGene00046788	21ur-5448	IV	15662930	15662950	1	1	0	0	0	0	0	0
WBGene00046789	21ur-5127	IV	15354975	15354995	-1	1.06135e-06	-5.66475	70.647	74.9563	99.444	4.45849	0
WBGene00046790	21ur-2639	IV	15174576	15174596	1	0.0331608	0.554475	251.503	242.506	143.641	294.26	333.303
WBGene00046791	21ur-3288	IV	16191949	16191969	-1	0.00787781	3.91107	0	1.46973	0	15.6047	9.66094
WBGene00046792	21ur-1265	IV	15160807	15160827	1	5.11014e-10	1.19858	347.583	421.813	444.736	976.41	888.807
WBGene00046793	21ur-479	IV	14170960	14170980	1	#N/A	#N/A	0	0	0	0	0
WBGene00046794	21ur-4270	IV	5872488	5872508	1	#N/A	#N/A	0	0	0	0	0
WBGene00046795	21ur-428	IV	16830052	16830072	1	0.000115314	-1.74618	279.762	233.687	259.659	69.1066	83.3256
WBGene00046796	21ur-2343	IV	14474434	14474454	1	0.00154953	-5.14344	19.7812	27.9249	38.6727	2.22925	0
WBGene00046797	21ur-889	IV	16531098	16531118	1	0.22012	-3.53576	8.47764	0	2.76233	0	0
WBGene00046798	21ur-3100	IV	13961570	13961590	-1	0.129125	-2.06883	14.1294	5.87892	11.0493	2.22925	2.41524
WBGene00046799	21ur-4740	IV	16703282	16703302	1	0.295697	2.49403	0	0	0	2.22925	2.41524
WBGene00046800	21ur-2752	IV	15818283	15818303	1	0.853515	0.188724	45.2141	88.1839	30.3857	64.6481	65.2114
WBGene00046801	21ur-5227	IV	14495919	14495939	1	8.6328e-32	-2.82459	2023.33	1962.09	1991.64	260.822	299.489
WBGene00046802	21ur-4520	IV	5194537	5194557	-1	#N/A	#N/A	0	0	0	0	0
WBGene00046803	21ur-5302	IV	5330320	5330340	-1	#N/A	#N/A	0	0	0	0	0
WBGene00046804	21ur-3011	IV	5522811	5522831	1	0.511765	-1.36061	5.65176	8.81839	2.76233	2.22925	2.41524
WBGene00046805	21ur-2703	IV	15978206	15978226	-1	0.684501	0.724597	8.47764	2.93946	0	11.1462	2.41524
WBGene00046806	21ur-526	IV	6489717	6489737	1	0.00457351	1.13205	418.23	665.788	439.211	978.639	1253.51
WBGene00046807	21ur-369	IV	5481027	5481047	1	0.401279	1.94768	0	2.93946	0	6.68774	3.62285
WBGene00046808	21ur-4826	IV	14965714	14965734	1	1.99525e-18	-5.00184	268.459	226.339	240.323	2.22925	10.8686
WBGene00046809	21ur-306	IV	15425195	15425215	1	#N/A	#N/A	0	0	0	0	0
WBGene00046810	21ur-1048	IV	5757986	5758006	-1	0.97873	0.868413	0	0	0	0	1.20762
WBGene00046811	21ur-2687	IV	16250693	16250713	-1	0.73662	0.433729	8.47764	13.2276	5.52467	11.1462	14.4914
WBGene00046812	21ur-4994	IV	16274867	16274887	1	0.660417	-0.177096	152.598	145.503	212.7	158.276	141.291
WBGene00046813	21ur-591	IV	15302717	15302737	1	0.319467	1.55731	2.82588	0	5.52467	4.45849	8.45333
WBGene00046814	21ur-2282	IV	15542639	15542659	-1	1	0	0	0	0	0	0
WBGene00046815	21ur-2662	IV	14321652	14321672	1	0.00199218	0.94979	113.035	108.76	110.493	198.403	227.032
WBGene00046816	21ur-3571	IV	14132514	14132534	1	0.0543232	1.67892	8.47764	4.40919	2.76233	13.3755	18.1143
WBGene00046817	21ur-2192	IV	15219426	15219446	-1	0.00161864	1.01856	59.3435	48.5011	58.009	102.545	115.931
WBGene00046818	21ur-1864	IV	16252791	16252811	1	0.885903	-1.39458	0	1.46973	0	0	0
WBGene00046819	21ur-2490	IV	15279422	15279442	1	0.574558	0.790266	0	11.7578	5.52467	13.3755	9.66094
WBGene00046820	21ur-5207	IV	15875293	15875313	1	5.62249e-05	0.949015	245.852	191.065	146.404	385.66	364.701
WBGene00046821	21ur-2640	IV	16461070	16461090	-1	0.359747	-3.58458	8.47764	0	2.76233	0	0
WBGene00046822	21ur-4727	IV	16625590	16625610	1	6.60155e-06	-1.18334	570.828	476.193	563.516	214.008	254.807
WBGene00046823	21ur-3237	IV	14638070	14638090	1	0.373195	-1.7959	11.3035	2.93946	5.52467	4.45849	0
WBGene00046824	21ur-2423	IV	14805483	14805503	1	1	0.0413051	53.6917	45.5617	49.722	60.1896	43.4743
WBGene00046825	21ur-1590	IV	15363959	15363979	1	0.0584072	0.676624	42.3882	55.8498	63.5337	95.8576	79.7028
WBGene00046826	21ur-3729	IV	14433171	14433191	-1	0.0260954	0.700129	214.767	174.898	185.076	365.596	258.43
WBGene00046827	21ur-3452	IV	16794723	16794743	1	0.58479	0.140478	469.096	504.118	444.736	514.956	530.144
WBGene00046828	21ur-578	IV	16786607	16786627	1	3.53347e-08	-8.68773	135.642	108.76	132.592	0	0
WBGene00046829	21ur-4186	IV	5337359	5337379	-1	0.30682	0.435944	163.901	267.491	113.256	245.217	254.807
WBGene00046830	21ur-3732	IV	15536062	15536082	1	0.000780663	1.22846	81.9506	67.6076	107.731	258.593	142.499
WBGene00046831	21ur-1873	IV	14716806	14716826	-1	4.6386e-05	-5.16357	48.04	60.259	55.2467	0	2.41524
WBGene00046832	21ur-534	IV	16005042	16005062	1	1	0	0	0	0	0	0
WBGene00046833	21ur-3984	IV	13646547	13646567	1	0.172115	-3.24486	0	5.87892	16.574	0	1.20762
WBGene00046834	21ur-2702	IV	14921635	14921655	1	0.415426	-2.12158	5.65176	2.93946	2.76233	2.22925	0
WBGene00046835	21ur-3169	IV	15714592	15714612	-1	0.97873	0.373227	0	2.93946	0	2.22925	1.20762
WBGene00046836	21ur-794	IV	15561773	15561793	-1	1.21666e-24	-5.09896	268.459	314.522	397.776	13.3755	7.24571
WBGene00046837	21ur-2132	IV	15392573	15392593	-1	0.0410776	0.536823	505.833	514.406	386.727	653.169	710.079
WBGene00046838	21ur-1000	IV	14721565	14721585	-1	2.09926e-21	-2.72534	794.073	781.897	544.18	127.067	90.5714
WBGene00046839	21ur-3284	IV	15350531	15350551	1	0.88766	-0.48097	2.82588	4.40919	2.76233	4.45849	1.20762
WBGene00046840	21ur-4542	IV	4956233	4956253	-1	1	0	0	0	0	0	0
WBGene00046841	21ur-1860	IV	5565661	5565681	-1	2.75917e-50	-6.81054	1138.83	1152.27	1127.03	8.91698	10.8686
WBGene00046842	21ur-3354	IV	14485452	14485472	1	0.902434	0.68827	0	2.93946	0	0	3.62285
WBGene00046843	21ur-2968	IV	5440347	5440367	-1	0.455883	1.56175	0	1.46973	2.76233	6.68774	2.41524
WBGene00046844	21ur-2024	IV	15711614	15711634	-1	1	0.0207874	14.1294	7.34866	5.52467	17.834	2.41524
WBGene00046845	21ur-3897	IV	15616639	15616659	-1	4.12671e-08	1.14755	211.941	283.658	229.274	510.497	571.203
WBGene00046846	21ur-423	IV	16099705	16099725	-1	0.367611	0.632229	31.0847	7.34866	19.3363	24.5217	28.9828
WBGene00046847	21ur-3887	IV	14405014	14405034	1	0.930382	0.274211	5.65176	4.40919	2.76233	2.22925	7.24571
WBGene00046848	21ur-68	IV	15183020	15183040	-1	5.52501e-40	-4.30415	1859.43	2767.5	2347.98	82.4821	148.537
WBGene00046849	21ur-273	IV	5802348	5802368	-1	1	0	0	0	0	0	0
WBGene00046850	21ur-3740	IV	6078416	6078436	1	3.89144e-07	1.13967	101.732	155.792	135.354	280.885	306.735
WBGene00046851	21ur-1919	IV	16194036	16194056	-1	0.0131549	1.19851	16.9553	22.046	24.861	42.3557	54.3428
WBGene00046852	21ur-4705	IV	6444658	6444678	-1	0.000827082	-2.85716	53.6917	29.3946	30.3857	0	8.45333
WBGene00046853	21ur-2934	IV	13948777	13948797	-1	0.0781929	0.370786	2051.59	2125.23	1524.81	2494.53	2428.52
WBGene00046854	21ur-1164	IV	15817413	15817433	-1	0.934731	0.879224	0	0	0	0	1.20762
WBGene00046855	21ur-2296	IV	14874511	14874531	-1	0.292224	-2.89958	2.82588	1.46973	2.76233	0	0
WBGene00046856	21ur-4592	IV	14512325	14512345	1	0.11861	-4.08583	0	4.40919	11.0493	0	0
WBGene00046857	21ur-2680	IV	14716285	14716305	1	0.919322	-0.671713	0	1.46973	2.76233	2.22925	0
WBGene00046858	21ur-628	IV	14690413	14690433	-1	0.000360532	1.23793	409.753	520.285	312.144	749.027	1208.83
WBGene00046859	21ur-4615	IV	13877232	13877252	-1	0.802306	-0.123842	206.289	191.065	209.937	198.403	173.897
WBGene00046860	21ur-4388	IV	16364994	16365014	1	8.72783e-08	-6.13232	90.4282	121.988	116.018	2.22925	1.20762
WBGene00046861	21ur-40	IV	15487971	15487991	-1	1.49298e-11	-3.24969	98.9059	120.518	154.691	8.91698	15.699
WBGene00046862	21ur-2875	IV	15362983	15363003	-1	0.0175964	0.699687	454.967	418.873	267.946	550.624	685.927
WBGene00046863	21ur-1844	IV	15396239	15396259	1	0.650688	1.16236	0	0	5.52467	0	6.03809
WBGene00046864	21ur-5052	IV	15845751	15845771	1	0.797341	-1.44958	0	0	2.76233	0	0
WBGene00046865	21ur-999	IV	16213863	16213883	1	0.00010347	1.6207	33.9106	44.0919	24.861	113.692	105.063
WBGene00046866	21ur-1235	IV	5888787	5888807	-1	5.03414e-05	-1.70676	96.08	107.29	146.404	20.0632	47.0971
WBGene00046867	21ur-408	IV	14848763	14848783	-1	1	0	0	0	0	0	0
WBGene00046868	21ur-3027	IV	14176647	14176667	1	2.35009e-26	-4.75776	395.623	430.631	301.094	11.1462	15.699
WBGene00046869	21ur-2938	IV	5797001	5797021	-1	1	0	0	0	0	0	0
WBGene00046870	21ur-2236	IV	5592162	5592182	-1	1	-0.0319179	8.47764	1.46973	2.76233	2.22925	4.83047
WBGene00046871	21ur-2658	IV	16884222	16884242	-1	1	0	0	0	0	0	0
WBGene00046872	21ur-4739	IV	15899893	15899913	1	0.994178	0.108166	25.4329	4.40919	13.8117	15.6047	13.2838
WBGene00046873	21ur-3952	IV	17034816	17034836	-1	0.756626	0.627424	0	8.81839	8.287	13.3755	6.03809
WBGene00046874	21ur-3492	IV	15216338	15216358	-1	0.0343051	2.47348	2.82588	4.40919	0	8.91698	20.5295
WBGene00046875	21ur-103	IV	4835169	4835189	1	0.00767059	1.05534	70.647	70.5471	80.1077	129.296	173.897
WBGene00046876	21ur-3941	IV	16077023	16077043	1	9.34295e-05	-1.88285	70.647	98.472	52.4843	22.2925	19.3219
WBGene00046877	21ur-1673	IV	14997272	14997292	-1	0.000882917	-1.49426	67.8212	69.0774	71.8207	28.9802	21.7371
WBGene00046878	21ur-1225	IV	16260008	16260028	-1	0.000186053	-1.67482	64.9953	72.0168	116.018	28.9802	24.1524
WBGene00046879	21ur-2172	IV	14885188	14885208	1	5.06815e-28	-3.9946	302.369	371.842	378.44	11.1462	28.9828
WBGene00046880	21ur-5054	IV	15267023	15267043	1	0.97873	-0.103575	22.6071	23.5157	11.0493	13.3755	21.7371
WBGene00046881	21ur-969	IV	14048154	14048174	-1	1.58088e-07	-1.1075	876.023	977.371	759.642	383.43	425.082
WBGene00046882	21ur-5234	IV	15614141	15614161	-1	0.793024	-0.44498	8.47764	7.34866	13.8117	6.68774	7.24571
WBGene00046883	21ur-1135	IV	14707515	14707535	-1	0.0156205	1.99683	5.65176	2.93946	13.8117	33.4387	21.7371
WBGene00046884	21ur-1681	IV	14412658	14412678	-1	1.76267e-24	-3.61319	686.689	1114.06	991.678	44.5849	102.648
WBGene00046885	21ur-2292	IV	15703316	15703336	1	1.65929e-05	1.25735	223.245	288.067	220.987	633.106	544.636
WBGene00046886	21ur-2427	IV	5600999	5601019	1	1	0	0	0	0	0	0
WBGene00046887	21ur-2678	IV	14685608	14685628	1	0.364449	-0.846543	8.47764	35.2735	30.3857	20.0632	9.66094
WBGene00046888	21ur-1342	IV	13989627	13989647	1	0.000215584	1.81657	19.7812	19.1065	11.0493	57.9604	61.5885
WBGene00046889	21ur-215	IV	15072828	15072848	-1	0.0417701	1.43228	16.9553	13.2276	0	24.5217	31.3981
WBGene00046890	21ur-5250	IV	14852193	14852213	-1	#N/A	#N/A	0	0	0	0	0
WBGene00046891	21ur-5089	IV	16908390	16908410	1	2.40329e-06	-2.24387	129.991	95.5325	74.583	20.0632	21.7371
WBGene00046892	21ur-4249	IV	15985969	15985989	1	6.02422e-19	-3.35189	293.892	335.099	464.072	51.2727	24.1524
WBGene00046893	21ur-2160	IV	15308805	15308825	-1	0.35739	2.00641	2.82588	0	0	4.45849	2.41524
WBGene00046894	21ur-2831	IV	14031540	14031560	-1	5.12972e-07	-4.18023	98.9059	49.9709	69.0583	4.45849	3.62285
WBGene00046895	21ur-4302	IV	5956169	5956189	-1	0.000237565	0.966333	901.456	809.822	643.624	1324.17	1740.18
WBGene00046896	21ur-870	IV	6993583	6993603	-1	0.889025	-1.39424	0	1.46973	0	0	0
WBGene00046897	21ur-2262	IV	6164139	6164159	-1	0.0169523	-3.52685	16.9553	24.9854	8.287	0	2.41524
WBGene00046898	21ur-4987	IV	16014564	16014584	-1	0.012107	0.988533	39.5623	30.8644	24.861	69.1066	57.9657
WBGene00046899	21ur-1070	IV	15568697	15568717	-1	6.93855e-06	-3.44434	56.5176	80.8352	35.9103	4.45849	6.03809
WBGene00046900	21ur-235	IV	16980480	16980500	-1	0.00180286	1.45948	73.4729	41.1525	19.3363	169.423	78.4952
WBGene00046901	21ur-3612	IV	14867071	14867091	1	0.0234028	-4.67657	11.3035	4.40919	8.287	0	0
WBGene00046902	21ur-1689	IV	16093040	16093060	-1	0.0224613	0.916851	115.861	91.1233	234.798	332.158	218.579
WBGene00046903	21ur-1292	IV	16617145	16617165	1	4.95796e-43	-3.95969	754.51	918.582	908.808	40.1264	66.419
WBGene00046904	21ur-3828	IV	5766033	5766053	-1	2.65828e-07	-8.21212	79.1247	85.2444	104.969	0	0
WBGene00046905	21ur-1397	IV	15180636	15180656	1	2.29569e-05	-4.48662	62.1694	70.5471	22.0987	2.22925	2.41524
WBGene00046906	21ur-4851	IV	13694512	13694532	-1	0.435061	-0.681699	22.6071	17.6368	27.6233	24.5217	6.03809
WBGene00046907	21ur-3868	IV	5578593	5578613	-1	1	0	0	0	0	0	0
WBGene00046908	21ur-5174	IV	15126422	15126442	1	0.977249	0.0686465	67.8212	49.9709	46.9597	44.5849	66.419
WBGene00046909	21ur-175	IV	14381738	14381758	1	0.030101	-1.8728	25.4329	23.5157	22.0987	8.91698	4.83047
WBGene00046910	21ur-557	IV	14053460	14053480	-1	1	-0.0214556	291.066	318.932	353.579	329.928	304.32
WBGene00046911	21ur-4274	IV	14928047	14928067	1	7.23064e-15	-7.14	341.932	439.45	229.274	6.68774	0
WBGene00046912	21ur-582	IV	16040612	16040632	-1	0.54476	-0.80842	5.65176	11.7578	11.0493	6.68774	4.83047
WBGene00046913	21ur-725	IV	16789550	16789570	1	0.555122	-2.52601	2.82588	0	2.76233	0	0
WBGene00046914	21ur-821	IV	16120310	16120330	-1	0.802779	1.02461	0	1.46973	0	2.22925	1.20762
WBGene00046915	21ur-2420	IV	14816894	14816914	-1	0.0113648	2.78052	0	5.87892	0	26.751	12.0762
WBGene00046916	21ur-1505	IV	15279790	15279810	1	0.806899	-1.45158	2.82588	0	0	0	0
WBGene00046917	21ur-4569	IV	16662196	16662216	-1	0.484823	-0.640114	22.6071	11.7578	22.0987	8.91698	13.2838
WBGene00046918	21ur-1099	IV	15679229	15679249	1	0.00877598	1.9439	5.65176	5.87892	13.8117	33.4387	28.9828
WBGene00046919	21ur-2395	IV	14868451	14868471	-1	0.231454	0.788465	14.1294	27.9249	22.0987	51.2727	27.7752
WBGene00046920	21ur-603	IV	16541430	16541450	-1	0.84967	0.116085	2404.83	2020.88	1635.3	1943.9	2432.14
WBGene00046921	21ur-2645	IV	16789244	16789264	1	1	0	0	0	0	0	0
WBGene00046922	21ur-1477	IV	14036297	14036317	-1	1.1279e-10	-2.47439	146.946	157.261	179.552	28.9802	28.9828
WBGene00046923	21ur-4292	IV	13818023	13818043	1	0.0865099	0.792104	50.8659	70.5471	38.6727	62.4189	123.177
WBGene00046924	21ur-358	IV	14908543	14908563	-1	0.00245642	-2.38675	28.2588	35.2735	44.1973	4.45849	8.45333
WBGene00046925	21ur-1462	IV	16115543	16115563	1	0.0118312	1.87102	5.65176	8.81839	2.76233	20.0632	25.36
WBGene00046926	21ur-4407	IV	13873770	13873790	-1	0.00312357	-5.37876	8.47764	14.6973	13.8117	0	0
WBGene00046927	21ur-3260	IV	14979888	14979908	1	0.00242968	0.756544	265.633	349.796	276.233	483.746	527.729
WBGene00046928	21ur-2154	IV	14695984	14696004	1	0.475632	1.96944	0	0	0	2.22925	1.20762
WBGene00046929	21ur-4576	IV	16605152	16605172	-1	1	-0.0153742	19.7812	7.34866	19.3363	22.2925	8.45333
WBGene00046930	21ur-1751	IV	16196100	16196120	-1	7.46415e-07	-8.07605	104.558	86.7141	52.4843	0	0
WBGene00046931	21ur-3195	IV	15788295	15788315	1	3.34151e-36	-5.98961	697.993	895.066	593.902	6.68774	14.4914
WBGene00046932	21ur-2928	IV	16205483	16205503	1	0.000144843	-5.89523	36.7365	45.5617	60.7713	0	1.20762
WBGene00046933	21ur-3607	IV	5430087	5430107	1	0.622425	0.625462	11.3035	5.87892	5.52467	20.0632	4.83047
WBGene00046934	21ur-5178	IV	16129948	16129968	-1	0.538703	1.79624	0	0	0	0	2.41524
WBGene00046935	21ur-3088	IV	14730360	14730380	-1	1	0	0	0	0	0	0
WBGene00046936	21ur-169	IV	14177689	14177709	-1	0.454272	1.96115	0	0	0	2.22925	1.20762
WBGene00046937	21ur-4751	IV	6389520	6389540	-1	0.291684	-3.08197	5.65176	0	2.76233	0	0
WBGene00046938	21ur-2126	IV	16528011	16528031	-1	0.836754	-0.391931	14.1294	4.40919	8.287	6.68774	6.03809
WBGene00046939	21ur-4834	IV	15743682	15743702	1	0.000134918	-1.30075	3057.6	3174.62	2693.28	1197.11	1218.49
WBGene00046940	21ur-2538	IV	15536065	15536085	1	0.000789879	1.22847	81.9506	67.6076	107.731	258.593	142.499
WBGene00046941	21ur-3572	IV	13758483	13758503	-1	8.11256e-10	-2.88551	101.732	119.048	104.969	13.3755	15.699
WBGene00046942	21ur-1910	IV	14982276	14982296	1	0.720914	-0.183128	206.289	204.293	124.305	158.276	158.198
WBGene00046943	21ur-750	IV	14486519	14486539	1	1	0	0	0	0	0	0
WBGene00046944	21ur-1483	IV	14704386	14704406	-1	0.00734096	1.28734	39.5623	35.2735	41.435	107.004	82.118
WBGene00046945	21ur-4452	IV	16006060	16006080	-1	0.00420456	-4.77478	31.0847	13.2276	24.861	2.22925	0
WBGene00046946	21ur-2756	IV	13712624	13712644	1	0.651696	1.72674	0	0	0	0	2.41524
WBGene00046947	21ur-3940	IV	16026135	16026155	-1	6.04675e-06	-1.12449	203.463	201.353	207.175	109.233	82.118
WBGene00046948	21ur-2252	IV	15604944	15604964	-1	0.283293	0.655127	25.4329	23.5157	19.3363	35.6679	36.2285
WBGene00046949	21ur-1102	IV	14737763	14737783	1	0.152533	2.34359	2.82588	1.46973	0	8.91698	6.03809
WBGene00046950	21ur-1993	IV	5482674	5482694	1	1	-0.0645534	0	1.46973	0	0	1.20762
WBGene00046951	21ur-762	IV	6196117	6196137	1	7.55813e-15	-1.80285	350.409	396.827	359.103	109.233	103.855
WBGene00046952	21ur-3936	IV	16691442	16691462	1	0.807266	1.02868	0	1.46973	0	2.22925	1.20762
WBGene00046953	21ur-1484	IV	14886425	14886445	-1	1	-0.0142074	14.1294	13.2276	8.287	6.68774	15.699
WBGene00046954	21ur-4524	IV	14565961	14565981	-1	0.0924627	-3.82371	2.82588	4.40919	5.52467	0	0
WBGene00046955	21ur-5105	IV	13954115	13954135	1	0.00795422	0.636334	935.367	1003.83	828.7	1272.9	1595.26
WBGene00046956	21ur-260	IV	14856368	14856388	1	0.117889	2.42142	0	2.93946	0	11.1462	4.83047
WBGene00046957	21ur-4680	IV	13819066	13819086	1	9.63476e-11	-1.86007	319.325	255.733	301.094	91.3991	71.2495
WBGene00046958	21ur-3108	IV	5784988	5785008	1	5.94433e-14	-2.81946	169.553	180.777	182.314	26.751	24.1524
WBGene00046959	21ur-607	IV	15099164	15099184	-1	0.00351215	0.984341	84.7764	70.5471	82.87	111.462	193.219
WBGene00046960	21ur-3816	IV	16150815	16150835	-1	0.288915	0.829297	5.65176	10.2881	16.574	22.2925	16.9067
WBGene00046961	21ur-1564	IV	13721461	13721481	-1	0.00540015	-1.81098	36.7365	41.1525	24.861	6.68774	12.0762
WBGene00046962	21ur-2611	IV	14412346	14412366	-1	1	0	0	0	0	0	0
WBGene00046963	21ur-1367	IV	16891847	16891867	-1	0.0102867	1.03507	39.5623	42.6222	19.3363	60.1896	80.9104
WBGene00046964	21ur-2086	IV	15625722	15625742	1	0.371545	0.742847	11.3035	11.7578	8.287	8.91698	24.1524
WBGene00046965	21ur-3665	IV	14609030	14609050	1	0.11281	-3.16763	8.47764	10.2881	2.76233	2.22925	0
WBGene00046966	21ur-4063	IV	15960756	15960776	-1	1.55813e-07	-6.13664	135.642	130.806	63.5337	2.22925	1.20762
WBGene00046967	21ur-1466	IV	14227013	14227033	1	0.0357376	0.803567	53.6917	80.8352	41.435	93.6283	117.139
WBGene00046968	21ur-201	IV	16024537	16024557	-1	0.14342	-3.45064	5.65176	0	5.52467	0	0
WBGene00046969	21ur-868	IV	14662649	14662669	-1	0.181522	-2.50002	5.65176	5.87892	13.8117	0	2.41524
WBGene00046970	21ur-1899	IV	15397446	15397466	1	0.707143	0.529722	11.3035	4.40919	8.287	15.6047	7.24571
WBGene00046971	21ur-452	IV	15786745	15786765	1	0.0634702	0.45255	276.936	298.355	196.126	323.241	384.023
WBGene00046972	21ur-3094	IV	13920645	13920665	-1	0.0127844	-4.86585	11.3035	2.93946	13.8117	0	0
WBGene00046973	21ur-1682	IV	15613706	15613726	-1	0.867213	-0.356966	11.3035	11.7578	2.76233	6.68774	7.24571
WBGene00046974	21ur-469	IV	14571278	14571298	-1	0.851941	0.922451	0	0	0	0	1.20762
WBGene00046975	21ur-4501	IV	16554058	16554078	1	0.299352	1.32994	0	5.87892	5.52467	6.68774	13.2838
WBGene00046976	21ur-1400	IV	15422381	15422401	1	1.28351e-26	-2.96776	367.365	295.416	372.915	42.3557	44.6819
WBGene00046977	21ur-698	IV	16054337	16054357	1	0.0551071	3.49373	0	0	0	4.45849	4.83047
WBGene00046978	21ur-75	IV	14813729	14813749	1	2.15118e-26	-4.83269	406.927	424.752	337.005	6.68774	18.1143
WBGene00046979	21ur-1522	IV	14914002	14914022	-1	1	-0.0748337	0	1.46973	19.3363	4.45849	7.24571
WBGene00046980	21ur-1619	IV	16247111	16247131	-1	0.127206	1.0993	19.7812	14.6973	11.0493	42.3557	24.1524
WBGene00046981	21ur-3003	IV	5829425	5829445	-1	0.639519	0.413678	45.2141	39.6827	19.3363	15.6047	73.6647
WBGene00046982	21ur-5339	IV	16673604	16673624	-1	0.416622	-2.92721	2.82588	1.46973	2.76233	0	0
WBGene00046983	21ur-4353	IV	14887960	14887980	-1	0.0553039	-4.35434	0	11.7578	5.52467	0	0
WBGene00046984	21ur-3121	IV	16727323	16727343	1	0.386172	2.32201	0	0	0	0	3.62285
WBGene00046985	21ur-1176	IV	15425349	15425369	-1	0.00551671	-3.32319	14.1294	14.6973	46.9597	4.45849	1.20762
WBGene00046986	21ur-2685	IV	15541081	15541101	-1	0.790797	0.317246	14.1294	23.5157	8.287	26.751	15.699
WBGene00046987	21ur-1312	IV	16550925	16550945	1	3.21424e-11	-3.48694	104.558	117.578	132.592	17.834	6.03809
WBGene00046988	21ur-4190	IV	15777865	15777885	1	5.74386e-10	-4.41977	98.9059	114.639	93.9193	8.91698	2.41524
WBGene00046989	21ur-3349	IV	13625974	13625994	-1	0.530262	0.509833	16.9553	24.9854	8.287	33.4387	19.3219
WBGene00046990	21ur-5236	IV	15976781	15976801	-1	0.00288777	1.6651	8.47764	16.167	13.8117	49.0434	37.4362
WBGene00046991	21ur-2787	IV	15848479	15848499	1	0.824817	-1.45585	2.82588	0	0	0	0
WBGene00046992	21ur-3586	IV	16555049	16555069	1	#N/A	#N/A	0	0	0	0	0
WBGene00046993	21ur-5144	IV	16006585	16006605	-1	3.56774e-12	-4.57819	110.209	135.215	149.166	6.68774	4.83047
WBGene00046994	21ur-2977	IV	13824087	13824107	1	4.75541e-05	-6.83995	42.3882	29.3946	33.148	0	0
WBGene00046995	21ur-3473	IV	14486992	14487012	1	0.316163	0.700392	16.9553	14.6973	19.3363	24.5217	28.9828
WBGene00046996	21ur-52	IV	16902981	16903001	1	2.91724e-22	-3.2849	308.021	439.45	245.848	33.4387	35.0209
WBGene00046997	21ur-153	IV	16163472	16163492	1	6.87004e-17	-3.77692	302.369	263.082	218.224	13.3755	22.9447
WBGene00046998	21ur-4466	IV	16543448	16543468	1	1.88246e-08	-3.06299	50.8659	154.322	165.74	15.6047	14.4914
WBGene00046999	21ur-2828	IV	16878859	16878879	1	0.225825	-2.07156	5.65176	7.34866	5.52467	0	2.41524
WBGene00047000	21ur-5259	IV	13731968	13731988	-1	0.02683	2.26032	2.82588	4.40919	2.76233	20.0632	14.4914
WBGene00047001	21ur-681	IV	14179762	14179782	1	1.45245e-05	-7.12606	36.7365	38.213	52.4843	0	0
WBGene00047002	21ur-1450	IV	15087584	15087604	-1	4.2133e-05	-6.85689	31.0847	44.0919	27.6233	0	0
WBGene00047003	21ur-988	IV	14961570	14961590	1	0.419626	-2.93621	5.65176	1.46973	0	0	0
WBGene00047004	21ur-2567	IV	6031396	6031416	-1	0.0723856	0.730219	48.04	35.2735	55.2467	93.6283	59.1733
WBGene00047005	21ur-571	IV	14568057	14568077	1	2.21943e-13	-4.66921	135.642	126.397	209.937	2.22925	8.45333
WBGene00047006	21ur-3783	IV	16689910	16689930	1	1.0834e-06	-5.73028	90.4282	95.5325	58.009	0	2.41524
WBGene00047007	21ur-284	IV	14274094	14274114	1	0.000696384	1.55585	28.2588	17.6368	13.8117	57.9604	56.7581
WBGene00047008	21ur-2358	IV	14190706	14190726	1	0.0011509	-5.34195	56.5176	24.9854	19.3363	2.22925	0
WBGene00047009	21ur-24	IV	14306368	14306388	1	0.850702	-0.258841	31.0847	16.167	22.0987	17.834	19.3219
WBGene00047010	21ur-3593	IV	15341421	15341441	-1	0.698148	-1.28632	2.82588	4.40919	2.76233	0	2.41524
WBGene00047011	21ur-4337	IV	14296454	14296474	-1	0.000599237	-5.50197	53.6917	26.4552	30.3857	0	1.20762
WBGene00047012	21ur-5364	IV	14310457	14310477	-1	0.104714	1.42769	0	8.81839	8.287	20.0632	14.4914
WBGene00047013	21ur-4684	IV	17205944	17205964	1	0.000117904	1.14994	96.08	169.019	182.314	332.158	335.718
WBGene00047014	21ur-4589	IV	15256167	15256187	1	6.08539e-08	1.20255	1540.11	1728.4	1850.76	3444.18	4406.6
WBGene00047015	21ur-438	IV	14732559	14732579	-1	0.721618	-0.436046	14.1294	17.6368	46.9597	33.4387	7.24571
WBGene00047016	21ur-4664	IV	5712071	5712091	1	0.16143	-3.89444	5.65176	7.34866	0	0	0
WBGene00047017	21ur-3636	IV	13886176	13886196	1	0.000586598	-5.5508	36.7365	48.5011	24.861	0	1.20762
WBGene00047018	21ur-854	IV	16447035	16447055	1	0.843994	-1.01317	0	4.40919	0	2.22925	0
WBGene00047019	21ur-2902	IV	15727963	15727983	-1	8.44694e-07	-1.35632	333.454	283.658	325.955	127.067	118.347
WBGene00047020	21ur-4325	IV	14709749	14709769	-1	4.84999e-05	-6.90732	33.9106	22.046	55.2467	0	0
WBGene00047021	21ur-108	IV	14097002	14097022	-1	3.3135e-30	-3.23755	392.798	399.767	317.668	31.2094	44.6819
WBGene00047022	21ur-4342	IV	15160544	15160564	1	1	0	0	0	0	0	0
WBGene00047023	21ur-908	IV	16137301	16137321	-1	2.32578e-05	1.0686	576.48	496.769	433.686	878.323	1222.11
WBGene00047024	21ur-3958	IV	6410389	6410409	1	5.03199e-16	-4.27712	206.289	201.353	174.027	22.2925	2.41524
WBGene00047025	21ur-4391	IV	14041478	14041498	-1	1	-0.0284937	0	1.46973	0	0	1.20762
WBGene00047026	21ur-2415	IV	14976914	14976934	-1	0.166199	1.74606	2.82588	2.93946	2.76233	11.1462	8.45333
WBGene00047027	21ur-3600	IV	5838088	5838108	1	0.000465763	-5.51376	39.5623	36.7433	33.148	0	1.20762
WBGene00047028	21ur-4825	IV	14972330	14972350	1	0.718366	-0.705851	5.65176	4.40919	8.287	0	6.03809
WBGene00047029	21ur-1375	IV	15684063	15684083	-1	0.00280389	0.925714	79.1247	79.3655	96.6817	176.11	147.329
WBGene00047030	21ur-2167	IV	14092272	14092292	-1	0.73662	-0.947438	0	4.40919	5.52467	4.45849	0
WBGene00047031	21ur-1039	IV	15248478	15248498	-1	0.833871	0.449247	5.65176	5.87892	2.76233	11.1462	3.62285
WBGene00047032	21ur-3924	IV	14695110	14695130	-1	0.00563347	-1.61343	39.5623	36.7433	58.009	17.834	12.0762
WBGene00047033	21ur-5110	IV	17205987	17206007	-1	0.0902024	-4.01714	11.3035	1.46973	2.76233	0	0
WBGene00047034	21ur-5279	IV	5334389	5334409	-1	0.10812	0.759529	259.981	376.251	179.552	488.205	439.573
WBGene00047035	21ur-2591	IV	6444655	6444675	-1	0.000827082	-2.85716	53.6917	29.3946	30.3857	0	8.45333
WBGene00047036	21ur-2578	IV	16447477	16447497	-1	0.328165	-3.09079	0	0	8.287	0	0
WBGene00047037	21ur-5166	IV	15891999	15892019	1	0.00644274	1.9662	14.1294	8.81839	0	40.1264	22.9447
WBGene00047038	21ur-2182	IV	6403760	6403780	-1	0.127995	-4.03259	5.65176	1.46973	8.287	0	0
WBGene00047039	21ur-1767	IV	16038059	16038079	-1	0.571809	-2.46848	0	4.40919	0	0	0
WBGene00047040	21ur-5420	IV	16634120	16634140	1	0.0186379	-4.09825	8.47764	20.5762	11.0493	2.22925	0
WBGene00047041	21ur-4815	IV	14599774	14599794	1	#N/A	#N/A	0	0	0	0	0
WBGene00047042	21ur-3530	IV	13603904	13603924	1	0.419613	-1.02078	8.47764	14.6973	8.287	4.45849	6.03809
WBGene00047043	21ur-1043	IV	15606134	15606154	1	0.00321563	-5.56055	14.1294	14.6973	13.8117	0	0
WBGene00047044	21ur-4758	IV	5610789	5610809	-1	1.95928e-05	-7.01355	42.3882	32.3341	44.1973	0	0
WBGene00047045	21ur-196	IV	16018632	16018652	1	0.561267	-2.06711	0	2.93946	0	0	0
WBGene00047046	21ur-775	IV	16820706	16820726	-1	0.0150787	1.04771	28.2588	39.6827	55.2467	89.1698	80.9104
WBGene00047047	21ur-3067	IV	15267812	15267832	-1	0.541506	-2.69925	0	2.93946	2.76233	0	0
WBGene00047048	21ur-1608	IV	13818368	13818388	1	0.914588	0.46683	2.82588	2.93946	0	6.68774	0
WBGene00047049	21ur-4608	IV	15426853	15426873	1	3.71579e-05	-3.67693	59.3435	49.9709	46.9597	6.68774	2.41524
WBGene00047050	21ur-1046	IV	15613539	15613559	-1	0.997082	-0.353673	0	4.40919	0	0	2.41524
WBGene00047051	21ur-1319	IV	15925652	15925672	1	0.00463522	-5.31083	14.1294	13.2276	8.287	0	0
WBGene00047052	21ur-2215	IV	14706785	14706805	-1	0.424745	2.30126	0	0	0	0	3.62285
WBGene00047053	21ur-594	IV	5821540	5821560	1	0.448669	0.25966	175.205	116.109	127.067	153.818	172.689
WBGene00047054	21ur-4030	IV	13924307	13924327	-1	0.0186337	-2.80518	36.7365	10.2881	16.574	0	4.83047
WBGene00047055	21ur-5432	IV	13998335	13998355	-1	0.0512863	0.647564	1147.31	1424.17	1013.78	1687.54	2060.2
WBGene00047056	21ur-1732	IV	15177767	15177787	-1	0.0909733	-4.24512	11.3035	5.87892	0	0	0
WBGene00047057	21ur-1244	IV	14608265	14608285	1	0.109845	-2.19452	25.4329	16.167	0	2.22925	3.62285
WBGene00047058	21ur-5111	IV	15126994	15127014	1	0.820252	1.02247	0	0	0	2.22925	0
WBGene00047059	21ur-4945	IV	15715031	15715051	1	0.724981	-1.43508	2.82588	0	0	0	0
WBGene00047060	21ur-4182	IV	14435217	14435237	1	0.562884	-2.47327	0	4.40919	0	0	0
WBGene00047061	21ur-818	IV	6494083	6494103	1	0.97681	-0.335596	0	2.93946	2.76233	2.22925	1.20762
WBGene00047062	21ur-2774	IV	15602251	15602271	-1	0.65299	0.153134	223.245	282.188	243.085	263.051	294.659
WBGene00047063	21ur-3537	IV	16209232	16209252	1	0.0961895	1.56891	5.65176	5.87892	8.287	26.751	13.2838
WBGene00047064	21ur-5019	IV	14475696	14475716	1	7.50743e-06	1.31404	73.4729	121.988	82.87	200.632	270.506
WBGene00047065	21ur-503	IV	15068604	15068624	1	0.913471	0.107922	186.508	208.702	116.018	173.881	195.634
WBGene00047066	21ur-3146	IV	14904903	14904923	-1	0.421577	2.93805	0	0	0	6.68774	0
WBGene00047067	21ur-123	IV	16474023	16474043	-1	0.225072	-2.99548	2.82588	0	5.52467	0	0
WBGene00047068	21ur-808	IV	15438538	15438558	-1	0.308839	0.924384	5.65176	17.6368	27.6233	44.5849	21.7371
WBGene00047069	21ur-1131	IV	14250926	14250946	1	0.805107	-1.40105	0	1.46973	0	0	0
WBGene00047070	21ur-2012	IV	15701559	15701579	1	#N/A	#N/A	0	0	0	0	0
WBGene00047071	21ur-3973	IV	16801182	16801202	-1	0.00248276	1.00439	93.2541	82.3049	60.7713	160.506	156.99
WBGene00047072	21ur-994	IV	14683633	14683653	-1	2.43456e-15	-1.60008	627.346	606.999	792.79	202.861	237.901
WBGene00047073	21ur-5037	IV	17056274	17056294	1	0.465624	1.29261	0	1.46973	5.52467	4.45849	6.03809
WBGene00047074	21ur-2714	IV	16120735	16120755	1	3.45463e-08	1.67105	64.9953	79.3655	69.0583	169.423	282.583
WBGene00047075	21ur-1362	IV	14183831	14183851	1	2.81699e-18	-4.92997	214.767	310.113	215.462	15.6047	3.62285
WBGene00047076	21ur-596	IV	16660139	16660159	-1	0.280479	2.07472	0	1.46973	2.76233	4.45849	7.24571
WBGene00047077	21ur-4670	IV	16123419	16123439	-1	0.00774685	1.56542	5.65176	24.9854	13.8117	24.5217	67.6266
WBGene00047078	21ur-1497	IV	16392892	16392912	-1	0.250864	0.921445	2.82588	11.7578	13.8117	17.834	19.3219
WBGene00047079	21ur-4902	IV	6190169	6190189	1	3.33104e-22	-4.67512	336.28	268.961	223.749	6.68774	13.2838
WBGene00047080	21ur-3981	IV	14714440	14714460	-1	0.000349965	1.09301	59.3435	79.3655	55.2467	133.755	148.537
WBGene00047081	21ur-4209	IV	16196421	16196441	-1	1	0	0	0	0	0	0
WBGene00047082	21ur-2161	IV	13610116	13610136	-1	1.46707e-15	-4.23283	178.031	213.111	176.789	8.91698	10.8686
WBGene00047083	21ur-5196	IV	5840485	5840505	-1	0.4069	2.0449	0	1.46973	0	4.45849	2.41524
WBGene00047084	21ur-5028	IV	5809473	5809493	-1	4.73653e-05	-4.20628	36.7365	41.1525	49.722	0	3.62285
WBGene00047085	21ur-3311	IV	14866776	14866796	1	0.146501	1.22711	8.47764	14.6973	5.52467	26.751	21.7371
WBGene00047086	21ur-4536	IV	14931035	14931055	1	0.00490589	0.97423	127.165	177.837	118.78	238.529	321.226
WBGene00047087	21ur-382	IV	16217542	16217562	-1	0.0618575	1.32115	5.65176	17.6368	5.52467	20.0632	32.6057
WBGene00047088	21ur-5263	IV	15503822	15503842	1	0.0759793	-3.58359	8.47764	4.40919	16.574	0	1.20762
WBGene00047089	21ur-1360	IV	15711337	15711357	-1	0.0914268	-3.68535	8.47764	1.46973	2.76233	0	0
WBGene00047090	21ur-3447	IV	15177093	15177113	-1	0.0260767	-4.05023	19.7812	11.7578	8.287	0	1.20762
WBGene00047091	21ur-1352	IV	16582437	16582457	-1	0.111223	1.52532	8.47764	4.40919	5.52467	24.5217	10.8686
WBGene00047092	21ur-2909	IV	16801420	16801440	-1	4.80954e-20	-3.76618	237.374	238.096	223.749	15.6047	18.1143
WBGene00047093	21ur-4786	IV	14450836	14450856	1	0.752229	0.363399	2.82588	17.6368	30.3857	22.2925	21.7371
WBGene00047094	21ur-3432	IV	15713344	15713364	1	9.94666e-05	-6.4568	28.2588	26.4552	24.861	0	0
WBGene00047095	21ur-2304	IV	16783103	16783123	1	0.00599431	-5.20237	11.3035	8.81839	13.8117	0	0
WBGene00047096	21ur-2892	IV	13840377	13840397	-1	0.358554	0.836295	2.82588	14.6973	8.287	15.6047	18.1143
WBGene00047097	21ur-836	IV	16143088	16143108	1	0.0319305	-4.2766	8.47764	10.2881	27.6233	0	1.20762
WBGene00047098	21ur-1937	IV	16175842	16175862	-1	0.630256	-2.24495	2.82588	1.46973	0	0	0
WBGene00047099	21ur-2541	IV	5918050	5918070	1	0.960829	-0.100459	39.5623	22.046	30.3857	22.2925	31.3981
WBGene00047100	21ur-4513	IV	15844269	15844289	1	0.684215	0.74186	2.82588	2.93946	5.52467	4.45849	7.24571
WBGene00047101	21ur-2874	IV	15140446	15140466	-1	0.8854	0.314797	14.1294	7.34866	8.287	13.3755	10.8686
WBGene00047102	21ur-5094	IV	5735630	5735650	-1	0.000430581	-4.53243	22.6071	49.9709	30.3857	0	2.41524
WBGene00047103	21ur-4888	IV	17228313	17228333	1	2.68426e-08	-5.32287	104.558	105.821	69.0583	2.22925	2.41524
WBGene00047104	21ur-4043	IV	14900180	14900200	1	0.814301	0.46388	8.47764	7.34866	5.52467	17.834	3.62285
WBGene00047105	21ur-1118	IV	16083731	16083751	1	0.857106	0.421407	5.65176	2.93946	5.52467	2.22925	8.45333
WBGene00047106	21ur-3073	IV	16670183	16670203	1	0.91409	-1.39241	0	1.46973	0	0	0
WBGene00047107	21ur-5446	IV	13898672	13898692	1	0.434761	-2.12163	2.82588	7.34866	0	2.22925	0
WBGene00047108	21ur-2117	IV	13726636	13726656	1	0.00289348	-5.4019	11.3035	8.81839	19.3363	0	0
WBGene00047109	21ur-564	IV	16873768	16873788	1	0.0870152	-4.17839	5.65176	2.93946	8.287	0	0
WBGene00047110	21ur-2598	IV	13749309	13749329	-1	1	0	0	0	0	0	0
WBGene00047111	21ur-2984	IV	5745366	5745386	1	1.88586e-05	-6.51733	67.8212	72.0168	80.1077	0	1.20762
WBGene00047112	21ur-5325	IV	15884514	15884534	1	0.287396	-3.09119	0	4.40919	2.76233	0	0
WBGene00047113	21ur-1555	IV	15071971	15071991	-1	0.341561	-0.519636	79.1247	74.9563	104.969	73.5651	48.3047
WBGene00047114	21ur-1204	IV	5930555	5930575	1	1	-0.104531	14.1294	11.7578	5.52467	13.3755	7.24571
WBGene00047115	21ur-4794	IV	14136624	14136644	1	0.820177	1.02057	0	0	0	2.22925	0
WBGene00047116	21ur-3173	IV	14161969	14161989	-1	1.06497e-12	-2.45743	178.031	158.731	201.65	26.751	36.2285
WBGene00047117	21ur-20	IV	16631999	16632019	1	8.84816e-08	-5.17555	81.9506	91.1233	80.1077	2.22925	2.41524
WBGene00047118	21ur-1210	IV	14126405	14126425	-1	3.53194e-07	-4.60444	56.5176	60.259	107.731	0	4.83047
WBGene00047119	21ur-3457	IV	16383213	16383233	-1	1.71774e-07	-6.05573	115.861	86.7141	110.493	0	2.41524
WBGene00047120	21ur-892	IV	16015411	16015431	1	3.36897e-16	-4.83557	347.583	301.295	276.233	8.91698	12.0762
WBGene00047121	21ur-2517	IV	15358216	15358236	-1	0.465633	1.13638	2.82588	4.40919	2.76233	6.68774	8.45333
WBGene00047122	21ur-4144	IV	5587414	5587434	-1	0.0127276	-5.39848	28.2588	10.2881	0	0	0
WBGene00047123	21ur-1327	IV	16357142	16357162	1	0.960207	0.287532	2.82588	2.93946	2.76233	6.68774	1.20762
WBGene00047124	21ur-5008	IV	15089492	15089512	1	0.039528	-0.787719	449.315	380.66	856.323	383.43	268.091
WBGene00047125	21ur-1871	IV	14441329	14441349	-1	2.93175e-07	1.24626	96.08	124.927	82.87	260.822	235.486
WBGene00047126	21ur-4172	IV	14602881	14602901	1	1	-0.119986	0	0	2.76233	0	1.20762
WBGene00047127	21ur-3000	IV	16225247	16225267	1	0.00216456	-3.15977	33.9106	20.5762	27.6233	0	4.83047
WBGene00047128	21ur-365	IV	16611465	16611485	-1	7.06909e-09	1.16079	409.753	455.617	433.686	1018.77	925.035
WBGene00047129	21ur-3282	IV	16215567	16215587	-1	0.00020865	-2.4726	48.04	35.2735	55.2467	13.3755	4.83047
WBGene00047130	21ur-1301	IV	14483678	14483698	-1	1	0.146387	0	0	2.76233	2.22925	0
WBGene00047131	21ur-5401	IV	16137118	16137138	1	0.0485622	1.55707	8.47764	22.046	0	40.1264	28.9828
WBGene00047132	21ur-1601	IV	5751017	5751037	-1	0.45406	-0.97239	11.3035	10.2881	5.52467	4.45849	4.83047
WBGene00047133	21ur-1054	IV	16220680	16220700	-1	0.987205	-0.432412	0	2.93946	0	2.22925	0
WBGene00047134	21ur-11	IV	17035805	17035825	-1	0.000730154	-5.41013	42.3882	36.7433	22.0987	0	1.20762
WBGene00047135	21ur-3183	IV	14399897	14399917	1	0.0195468	-3.25451	5.65176	19.1065	19.3363	2.22925	1.20762
WBGene00047136	21ur-3656	IV	16798834	16798854	-1	0.16999	-2.42653	2.82588	7.34866	13.8117	0	2.41524
WBGene00047137	21ur-2098	IV	15314039	15314059	1	0.00129186	-5.94632	16.9553	26.4552	11.0493	0	0
WBGene00047138	21ur-1770	IV	13820102	13820122	-1	6.38852e-05	1.17428	84.7764	121.988	110.493	214.008	266.884
WBGene00047139	21ur-647	IV	13762729	13762749	1	1	0	0	0	0	0	0
WBGene00047140	21ur-3860	IV	14829889	14829909	1	6.48116e-05	1.71351	31.0847	22.046	16.574	91.3991	62.7961
WBGene00047141	21ur-2369	IV	16171215	16171235	1	0.275755	-2.62789	5.65176	5.87892	2.76233	0	1.20762
WBGene00047142	21ur-2005	IV	14587076	14587096	1	0.836754	0.160764	132.816	195.474	80.1077	162.735	148.537
WBGene00047143	21ur-1905	IV	15974975	15974995	-1	0.840621	-1.45884	0	0	2.76233	0	0
WBGene00047144	21ur-1109	IV	16452010	16452030	1	0.0573679	0.919111	19.7812	22.046	27.6233	40.1264	45.8895
WBGene00047145	21ur-4215	IV	16600396	16600416	-1	0.298137	-0.953176	14.1294	27.9249	11.0493	20.0632	2.41524
WBGene00047146	21ur-4133	IV	16133251	16133271	-1	4.38639e-05	-5.03865	59.3435	64.6682	24.861	0	2.41524
WBGene00047147	21ur-3371	IV	14538531	14538551	1	0.413176	1.35683	0	7.34866	2.76233	20.0632	1.20762
WBGene00047148	21ur-2930	IV	16605367	16605387	1	1	-0.107074	2.82588	0	0	0	1.20762
WBGene00047149	21ur-4546	IV	15774000	15774020	-1	1	0	0	0	0	0	0
WBGene00047150	21ur-3833	IV	14027510	14027530	-1	0.414317	-0.451731	36.7365	49.9709	38.6727	31.2094	31.3981
WBGene00047151	21ur-2390	IV	13811720	13811740	1	0.00663642	-5.23896	11.3035	11.7578	11.0493	0	0
WBGene00047152	21ur-2956	IV	16258620	16258640	-1	0.101828	-1.33124	31.0847	11.7578	38.6727	11.1462	9.66094
WBGene00047153	21ur-2744	IV	14294792	14294812	-1	2.99559e-12	-3.70005	129.991	167.549	121.543	8.91698	12.0762
WBGene00047154	21ur-3648	IV	4836613	4836633	-1	0.810405	0.834202	2.82588	1.46973	0	4.45849	1.20762
WBGene00047155	21ur-1984	IV	14413907	14413927	-1	0.000184467	1.65141	31.0847	14.6973	24.861	82.4821	59.1733
WBGene00047156	21ur-3081	IV	17157980	17158000	1	0.622697	-0.255019	84.7764	72.0168	71.8207	57.9604	67.6266
WBGene00047157	21ur-925	IV	14972386	14972406	-1	0.000146891	1.01547	206.289	136.685	116.018	276.426	333.303
WBGene00047158	21ur-3515	IV	15664124	15664144	-1	1.73411e-09	-5.67251	90.4282	126.397	140.879	2.22925	2.41524
WBGene00047159	21ur-4968	IV	16368992	16369012	-1	1	0	0	0	0	0	0
WBGene00047160	21ur-5314	IV	15779929	15779949	-1	0.478386	2.2522	0	0	0	4.45849	0
WBGene00047161	21ur-3305	IV	14927231	14927251	-1	0.00846647	0.982144	59.3435	47.0314	30.3857	86.9406	92.9866
WBGene00047162	21ur-5454	IV	14743903	14743923	-1	0.842911	-0.849261	0	1.46973	2.76233	0	1.20762
WBGene00047163	21ur-2554	IV	13954271	13954291	1	0.401139	-1.59139	5.65176	0	11.0493	2.22925	1.20762
WBGene00047164	21ur-5275	IV	14404217	14404237	1	5.23244e-07	-7.4758	186.508	149.913	93.9193	2.22925	0
WBGene00047165	21ur-1085	IV	14120833	14120853	1	0.853515	-1.46199	0	0	2.76233	0	0
WBGene00047166	21ur-376	IV	14863583	14863603	-1	1	0	0	0	0	0	0
WBGene00047167	21ur-3130	IV	15212192	15212212	1	0.480086	-2.52408	0	4.40919	0	0	0
WBGene00047168	21ur-1598	IV	13810184	13810204	1	9.04226e-08	-8.55972	144.12	121.988	74.583	0	0
WBGene00047169	21ur-2158	IV	5329348	5329368	1	1	0	0	0	0	0	0
WBGene00047170	21ur-1761	IV	15727515	15727535	1	0.02904	0.950561	28.2588	51.4406	27.6233	78.0236	68.8342
WBGene00047171	21ur-1369	IV	14721048	14721068	-1	0.914588	-1.39196	0	1.46973	0	0	0
WBGene00047172	21ur-3620	IV	17032691	17032711	1	0.251004	1.8768	2.82588	0	2.76233	4.45849	6.03809
WBGene00047173	21ur-623	IV	6174272	6174292	1	0.157089	2.87713	0	0	0	2.22925	3.62285
WBGene00047174	21ur-4801	IV	16078258	16078278	1	0.00960673	-5.00286	14.1294	2.93946	13.8117	0	0
WBGene00047175	21ur-4927	IV	15880204	15880224	1	0.00108346	2.35425	2.82588	10.2881	8.287	60.1896	21.7371
WBGene00047176	21ur-991	IV	16543828	16543848	1	5.08506e-13	-4.53045	146.946	161.67	129.83	8.91698	4.83047
WBGene00047177	21ur-1704	IV	16696700	16696720	-1	0.485322	-2.48246	2.82588	0	2.76233	0	0
WBGene00047178	21ur-702	IV	16571635	16571655	-1	0.646615	0.432915	14.1294	13.2276	13.8117	22.2925	15.699
WBGene00047179	21ur-689	IV	5284106	5284126	-1	0.950477	-0.0774649	121.513	74.9563	80.1077	102.545	72.4571
WBGene00047180	21ur-2921	IV	14757962	14757982	1	0.288281	1.04363	11.3035	1.46973	8.287	11.1462	13.2838
WBGene00047181	21ur-5156	IV	16176738	16176758	-1	1.69726e-12	-4.56022	169.553	183.716	93.9193	8.91698	4.83047
WBGene00047182	21ur-4003	IV	15885074	15885094	-1	0.066566	-2.07514	11.3035	17.6368	8.287	2.22925	3.62285
WBGene00047183	21ur-3855	IV	15483813	15483833	-1	0.695721	-1.99941	0	2.93946	0	0	0
WBGene00047184	21ur-1259	IV	13889092	13889112	-1	0.257391	2.04114	2.82588	1.46973	0	8.91698	3.62285
WBGene00047185	21ur-336	IV	16011237	16011257	-1	0.241839	1.87297	0	4.40919	0	8.91698	6.03809
WBGene00047186	21ur-312	IV	16122123	16122143	1	3.53194e-07	-2.50957	110.209	86.7141	66.296	22.2925	10.8686
WBGene00047187	21ur-5430	IV	5103112	5103132	1	0.00145124	-5.75015	16.9553	17.6368	13.8117	0	0
WBGene00047188	21ur-622	IV	6174615	6174635	-1	0.932468	0.68982	0	0	2.76233	0	2.41524
WBGene00047189	21ur-2255	IV	16601240	16601260	-1	1	0	0	0	0	0	0
WBGene00047190	21ur-2710	IV	15334521	15334541	-1	0.155087	-0.371425	1523.15	1325.7	1038.64	967.493	1034.93
WBGene00047191	21ur-615	IV	6047945	6047965	1	0.212106	0.844983	8.47764	11.7578	24.861	22.2925	28.9828
WBGene00047192	21ur-1276	IV	16520746	16520766	-1	5.35714e-13	-11.1216	601.913	609.938	809.364	0	0
WBGene00047193	21ur-1076	IV	13606514	13606534	-1	0.81359	-0.985901	5.65176	0	0	0	1.20762
WBGene00047194	21ur-4307	IV	16279147	16279167	1	0.140866	0.382869	211.941	282.188	245.848	316.553	332.095
WBGene00047195	21ur-5293	IV	14104281	14104301	-1	1	0	0	0	0	0	0
WBGene00047196	21ur-294	IV	14887062	14887082	1	0.0074378	0.861911	169.553	117.578	135.354	227.383	276.545
WBGene00047197	21ur-5335	IV	15174994	15175014	1	0.0339748	1.04257	33.9106	38.213	24.861	66.8774	68.8342
WBGene00047198	21ur-1742	IV	16096595	16096615	-1	8.05689e-10	-2.83728	113.035	116.109	118.78	24.5217	10.8686
WBGene00047199	21ur-3699	IV	16042507	16042527	1	0.000853029	2.71981	8.47764	4.40919	0	28.9802	27.7752
WBGene00047200	21ur-5212	IV	16079841	16079861	1	0.192498	-3.14205	0	4.40919	2.76233	0	0
WBGene00047201	21ur-2205	IV	15864545	15864565	1	0.00179469	4.97107	0	0	0	15.6047	10.8686
WBGene00047202	21ur-4714	IV	14971774	14971794	-1	1.30482e-13	-3.9778	161.075	179.307	140.879	11.1462	9.66094
WBGene00047203	21ur-228	IV	16558450	16558470	1	0.963463	-0.0946647	28.2588	36.7433	38.6727	24.5217	38.6438
WBGene00047204	21ur-2371	IV	14983174	14983194	-1	0.370977	0.514032	76.2988	55.8498	127.067	162.735	83.3256
WBGene00047205	21ur-1749	IV	5981472	5981492	-1	0.772508	0.293949	16.9553	38.213	71.8207	73.5651	32.6057
WBGene00047206	21ur-2698	IV	13946067	13946087	1	1.01959e-05	1.26945	101.732	108.76	99.444	300.948	205.295
WBGene00047207	21ur-3512	IV	16688964	16688984	1	0.353381	-2.74809	2.82588	2.93946	0	0	0
WBGene00047208	21ur-320	IV	14305745	14305765	-1	0.924174	0.0836113	70.647	74.9563	74.583	91.3991	67.6266
WBGene00047209	21ur-267	IV	6397494	6397514	-1	1	0	0	0	0	0	0
WBGene00047210	21ur-1431	IV	14686579	14686599	-1	0.566608	2.31775	0	0	0	4.45849	0
WBGene00047211	21ur-785	IV	14403915	14403935	1	0.00265081	2.00654	16.9553	14.6973	2.76233	40.1264	54.3428
WBGene00047212	21ur-655	IV	16683319	16683339	1	0.329772	0.932955	2.82588	10.2881	11.0493	24.5217	9.66094
WBGene00047213	21ur-4233	IV	14338850	14338870	1	1.12255e-14	-2.03538	989.059	1068.49	831.462	191.715	274.129
WBGene00047214	21ur-1309	IV	15990337	15990357	-1	0.319467	-1.78239	8.47764	4.40919	5.52467	4.45849	0
WBGene00047215	21ur-2360	IV	15321383	15321403	1	0.117164	0.57222	144.12	129.336	138.117	225.154	183.558
WBGene00047216	21ur-1692	IV	13761626	13761646	-1	0.0392753	-1.99247	16.9553	22.046	27.6233	6.68774	4.83047
WBGene00047217	21ur-2060	IV	14977860	14977880	1	0.324507	1.25464	2.82588	2.93946	5.52467	8.91698	8.45333
WBGene00047218	21ur-3330	IV	16356106	16356126	-1	1.0834e-06	-5.67036	118.687	66.1379	63.5337	4.45849	0
WBGene00047219	21ur-5383	IV	15753829	15753849	-1	1	-0.08034	0	0	2.76233	0	1.20762
WBGene00047220	21ur-5187	IV	5861524	5861544	-1	0.0400953	-4.66219	2.82588	8.81839	11.0493	0	0
WBGene00047221	21ur-3216	IV	5970439	5970459	-1	0.129046	0.588692	56.5176	48.5011	35.9103	80.2529	64.0038
WBGene00047222	21ur-1975	IV	16587495	16587515	-1	6.07522e-23	-2.3021	469.096	604.06	480.646	122.609	92.9866
WBGene00047223	21ur-230	IV	14883005	14883025	1	3.07506e-14	-6.38812	234.548	277.779	256.897	0	4.83047
WBGene00047224	21ur-496	IV	14047175	14047195	1	0.0829264	-2.89163	19.7812	19.1065	0	4.45849	0
WBGene00047225	21ur-3043	IV	5969462	5969482	1	7.92071e-08	-6.24965	84.7764	126.397	140.879	0	2.41524
WBGene00047226	21ur-3322	IV	14359645	14359665	-1	6.57527e-10	-2.5002	113.035	121.988	129.83	26.751	18.1143
WBGene00047227	21ur-4482	IV	16221001	16221021	-1	0.6856	2.36715	0	0	0	4.45849	0
WBGene00047228	21ur-4700	IV	14292641	14292661	-1	0.397456	2.10926	0	0	0	4.45849	0
WBGene00047229	21ur-4421	IV	15755948	15755968	-1	0.169228	-0.410394	175.205	132.276	162.978	129.296	106.27
WBGene00047230	21ur-5071	IV	15282223	15282243	1	1	0	0	0	0	0	0
WBGene00047231	21ur-4228	IV	13941867	13941887	1	0.364732	-0.971507	14.1294	13.2276	8.287	4.45849	7.24571
WBGene00047232	21ur-5184	IV	15768231	15768251	-1	0.0514474	-0.758906	245.852	216.05	162.978	131.526	115.931
WBGene00047233	21ur-4118	IV	5128074	5128094	-1	0.846373	0.501348	0	2.93946	11.0493	6.68774	6.03809
WBGene00047234	21ur-4874	IV	15566610	15566630	1	8.40286e-08	1.20508	220.419	254.263	165.74	557.311	445.611
WBGene00047235	21ur-2295	IV	15340012	15340032	-1	0.0023422	-0.97475	344.758	246.915	464.072	193.944	163.028
WBGene00047236	21ur-3882	IV	4961787	4961807	-1	1.32425e-06	-7.83265	76.2988	80.8352	46.9597	0	0
WBGene00047237	21ur-1040	IV	17199155	17199175	-1	#N/A	#N/A	0	0	0	0	0
WBGene00047238	21ur-5206	IV	16547814	16547834	1	0.00607906	-5.20411	14.1294	8.81839	11.0493	0	0
WBGene00047239	21ur-2261	IV	16783873	16783893	1	0.767761	-0.456199	2.82588	13.2276	13.8117	13.3755	3.62285
WBGene00047240	21ur-4523	IV	14671877	14671897	-1	0.819856	-0.24545	64.9953	36.7433	127.067	78.0236	49.5123
WBGene00047241	21ur-2284	IV	16137415	16137435	-1	0.105271	1.90637	5.65176	1.46973	2.76233	17.834	6.03809
WBGene00047242	21ur-109	IV	15759319	15759339	-1	1	0	0	0	0	0	0
WBGene00047243	21ur-3706	IV	16381019	16381039	1	5.2401e-07	-8.11825	70.647	117.578	58.009	0	0
WBGene00047244	21ur-2622	IV	16070775	16070795	-1	0.0129041	-4.83247	5.65176	13.2276	5.52467	0	0
WBGene00047245	21ur-2933	IV	6062774	6062794	-1	9.16152e-08	-2.22929	141.294	174.898	146.404	22.2925	41.059
WBGene00047246	21ur-4090	IV	15749851	15749871	-1	0.399657	-0.725748	16.9553	27.9249	13.8117	11.1462	13.2838
WBGene00047247	21ur-2699	IV	16212391	16212411	-1	0.000323305	-1.57981	84.7764	98.472	82.87	37.8972	24.1524
WBGene00047248	21ur-5419	IV	14092024	14092044	-1	0.0453179	1.48369	8.47764	11.7578	8.287	37.8972	19.3219
WBGene00047249	21ur-2270	IV	14403788	14403808	-1	0.131367	0.924634	28.2588	22.046	22.0987	49.0434	42.2666
WBGene00047250	21ur-33	IV	15818597	15818617	-1	0.885051	-0.756349	0	1.46973	2.76233	2.22925	0
WBGene00047251	21ur-4284	IV	14906161	14906181	1	0.876675	0.566425	2.82588	0	5.52467	6.68774	1.20762
WBGene00047252	21ur-3353	IV	14054533	14054553	-1	0.0926166	-2.10968	8.47764	11.7578	22.0987	4.45849	2.41524
WBGene00047253	21ur-3232	IV	16977914	16977934	-1	0.00421375	1.7128	19.7812	8.81839	5.52467	44.5849	28.9828
WBGene00047254	21ur-1230	IV	5443633	5443653	-1	0.914588	-0.287493	2.82588	8.81839	5.52467	8.91698	2.41524
WBGene00047255	21ur-216	IV	15806516	15806536	1	0.715965	0.346769	25.4329	14.6973	19.3363	24.5217	24.1524
WBGene00047256	21ur-2691	IV	14270029	14270049	-1	1	0	0	0	0	0	0
WBGene00047257	21ur-1965	IV	16728285	16728305	-1	0.00912421	-5.04286	2.82588	10.2881	16.574	0	0
WBGene00047258	21ur-1075	IV	15706678	15706698	-1	0.35183	1.34151	0	1.46973	11.0493	11.1462	8.45333
WBGene00047259	21ur-3329	IV	5565484	5565504	-1	0.00194159	2.1771	2.82588	5.87892	19.3363	40.1264	39.8514
WBGene00047260	21ur-346	IV	14490146	14490166	1	0.0636613	-4.08547	5.65176	4.40919	5.52467	0	0
WBGene00047261	21ur-4926	IV	15403495	15403515	-1	0.0171725	-3.30122	19.7812	11.7578	19.3363	4.45849	0
WBGene00047262	21ur-2078	IV	15755953	15755973	-1	0.169228	-0.410394	175.205	132.276	162.978	129.296	106.27
WBGene00047263	21ur-1158	IV	15605529	15605549	1	0.00101115	-5.26961	19.7812	27.9249	46.9597	2.22925	0
WBGene00047264	21ur-406	IV	13889751	13889771	-1	1.34189e-17	-4.36102	231.722	210.172	229.274	8.91698	12.0762
WBGene00047265	21ur-1694	IV	14675220	14675240	-1	1.66391e-10	-3.57086	98.9059	114.639	91.157	8.91698	8.45333
WBGene00047266	21ur-327	IV	14982117	14982137	-1	0.426227	-2.92871	2.82588	1.46973	2.76233	0	0
WBGene00047267	21ur-2173	IV	14393939	14393959	1	5.7268e-05	1.31714	84.7764	120.518	55.2467	173.881	268.091
WBGene00047268	21ur-1810	IV	13828448	13828468	1	0.0427446	2.67917	0	1.46973	5.52467	22.2925	7.24571
WBGene00047269	21ur-2559	IV	14904205	14904225	1	0.2655	2.05915	0	2.93946	0	6.68774	4.83047
WBGene00047270	21ur-2736	IV	17184635	17184655	-1	0.914588	-0.1931	19.7812	19.1065	8.287	20.0632	9.66094
WBGene00047271	21ur-3225	IV	15889050	15889070	1	0.00607816	1.71233	19.7812	7.34866	5.52467	37.8972	30.1905
WBGene00047272	21ur-1217	IV	15211948	15211968	1	0.135441	0.37638	760.162	582.014	693.346	844.884	908.129
WBGene00047273	21ur-4848	IV	15690034	15690054	1	1	0.0376564	79.1247	88.1839	66.296	62.4189	95.4018
WBGene00047274	21ur-3493	IV	15884846	15884866	1	1	0	0	0	0	0	0
WBGene00047275	21ur-4093	IV	16688711	16688731	1	0.0146849	1.31779	14.1294	16.167	16.574	33.4387	43.4743
WBGene00047276	21ur-1448	IV	17035628	17035648	1	0.00376098	2.39391	8.47764	11.7578	2.76233	66.8774	21.7371
WBGene00047277	21ur-3218	IV	16553616	16553636	-1	0.0752426	2.00423	5.65176	8.81839	0	22.2925	20.5295
WBGene00047278	21ur-4260	IV	6164480	6164500	1	1	0	0	0	0	0	0
WBGene00047279	21ur-985	IV	15680618	15680638	1	0.875119	1.0191	2.82588	0	0	2.22925	1.20762
WBGene00047280	21ur-5216	IV	14904658	14904678	1	0.943294	0.169923	5.65176	10.2881	16.574	15.6047	9.66094
WBGene00047281	21ur-5334	IV	15389736	15389756	-1	0.000630344	0.945555	192.16	199.883	212.7	399.035	377.984
WBGene00047282	21ur-1444	IV	15974097	15974117	-1	0.913471	-0.0711935	901.456	1159.62	1165.7	918.449	1127.92
WBGene00047283	21ur-2911	IV	17156959	17156979	1	9.72286e-07	-4.37765	87.6023	66.1379	44.1973	4.45849	2.41524
WBGene00047284	21ur-4917	IV	13728843	13728863	1	0.968964	0.871475	0	0	0	0	1.20762
WBGene00047285	21ur-143	IV	15655489	15655509	1	0.388397	0.634881	33.9106	16.167	22.0987	44.5849	28.9828
WBGene00047286	21ur-2967	IV	16182013	16182033	-1	0.16735	-3.40536	0	5.87892	2.76233	0	0
WBGene00047287	21ur-5374	IV	14984468	14984488	1	0.00308425	0.844008	536.917	649.621	422.637	842.655	1088.06
WBGene00047288	21ur-1243	IV	16341706	16341726	-1	0.97873	0.868413	0	0	0	0	1.20762
WBGene00047289	21ur-2636	IV	14967271	14967291	1	0.552069	0.49212	11.3035	23.5157	30.3857	42.3557	21.7371
WBGene00047290	21ur-993	IV	16572843	16572863	-1	0.822254	-0.462384	11.3035	4.40919	5.52467	6.68774	3.62285
WBGene00047291	21ur-1756	IV	15868448	15868468	1	3.70471e-07	-4.42981	84.7764	77.8958	44.1973	6.68774	1.20762
WBGene00047292	21ur-1716	IV	14242028	14242048	1	2.42151e-15	-3.9243	149.772	173.428	196.126	4.45849	15.699
WBGene00047293	21ur-4028	IV	15544729	15544749	1	0.0190939	-4.19436	16.9553	17.6368	8.287	0	1.20762
WBGene00047294	21ur-1603	IV	14567471	14567491	1	0.00844096	-5.1319	14.1294	7.34866	11.0493	0	0
WBGene00047295	21ur-4073	IV	14888216	14888236	-1	2.01171e-09	-4.44395	163.901	82.3049	69.0583	6.68774	3.62285
WBGene00047296	21ur-4531	IV	14748896	14748916	1	1.10102e-06	1.34883	76.2988	76.426	49.722	158.276	188.388
WBGene00047297	21ur-3462	IV	16804366	16804386	-1	0.000321914	-6.2607	33.9106	22.046	13.8117	0	0
WBGene00047298	21ur-2064	IV	14134497	14134517	-1	0.813859	-1.45308	0	0	2.76233	0	0
WBGene00047299	21ur-3652	IV	16083245	16083265	1	1	0.139739	0	1.46973	0	2.22925	0
WBGene00047300	21ur-1514	IV	15603279	15603299	1	3.17052e-08	1.17501	158.249	163.14	146.404	394.577	318.811
WBGene00047301	21ur-3021	IV	14507530	14507550	1	0.0905508	2.59658	0	1.46973	2.76233	8.91698	8.45333
WBGene00047302	21ur-3390	IV	15072995	15073015	-1	#N/A	#N/A	0	0	0	0	0
WBGene00047303	21ur-2757	IV	14806408	14806428	1	0.763886	-0.530537	5.65176	19.1065	0	8.91698	4.83047
WBGene00047304	21ur-3273	IV	13717736	13717756	-1	1.8566e-06	-2.0259	110.209	72.0168	85.6323	26.751	18.1143
WBGene00047305	21ur-4774	IV	16630378	16630398	1	1.63056e-13	1.22281	528.44	576.135	447.498	1272.9	1160.52
WBGene00047306	21ur-286	IV	14388974	14388994	-1	3.5135e-06	-2.65829	48.04	82.3049	77.3453	13.3755	9.66094
WBGene00047307	21ur-1411	IV	5051517	5051537	1	0.220135	-1.68104	14.1294	8.81839	5.52467	0	4.83047
WBGene00047308	21ur-1268	IV	14040280	14040300	-1	0.59099	1.43401	0	1.46973	0	0	3.62285
WBGene00047309	21ur-1183	IV	15756326	15756346	1	#N/A	#N/A	0	0	0	0	0
WBGene00047310	21ur-2019	IV	14850147	14850167	1	0.28185	1.03748	11.3035	1.46973	35.9103	42.3557	20.5295
WBGene00047311	21ur-743	IV	13646066	13646086	1	7.13605e-16	-2.1182	435.186	518.815	599.426	102.545	132.838
WBGene00047312	21ur-4445	IV	5199840	5199860	-1	0.0022034	-3.14404	19.7812	26.4552	35.9103	2.22925	3.62285
WBGene00047313	21ur-2601	IV	16530178	16530198	-1	7.21618e-18	-3.05057	209.115	270.431	251.372	17.834	37.4362
WBGene00047314	21ur-483	IV	15397130	15397150	-1	2.14645e-10	-7.1451	180.856	241.036	243.085	2.22925	1.20762
WBGene00047315	21ur-835	IV	14642462	14642482	-1	0.184433	1.09653	14.1294	4.40919	11.0493	22.2925	16.9067
WBGene00047316	21ur-1237	IV	16027064	16027084	1	3.60347e-05	1.43195	1828.35	1829.82	1756.84	3711.69	6024.81
WBGene00047317	21ur-3056	IV	14407546	14407566	-1	0.257729	1.03874	8.47764	7.34866	2.76233	11.1462	14.4914
WBGene00047318	21ur-4723	IV	15237444	15237464	1	0.0962386	1.34727	2.82588	11.7578	2.76233	20.0632	15.699
WBGene00047319	21ur-1474	IV	13946600	13946620	1	0.00446252	1.4517	14.1294	19.1065	16.574	49.0434	44.6819
WBGene00047320	21ur-1536	IV	16698565	16698585	-1	0.0462764	1.29933	16.9553	30.8644	13.8117	66.8774	41.059
WBGene00047321	21ur-3418	IV	14628161	14628181	-1	0.0812414	2.70723	0	1.46973	2.76233	8.91698	9.66094
WBGene00047322	21ur-4373	IV	16977373	16977393	1	9.66629e-40	-4.34266	514.31	576.135	599.426	33.4387	24.1524
WBGene00047323	21ur-953	IV	14975221	14975241	-1	1	0.0751621	2.82588	1.46973	2.76233	2.22925	2.41524
WBGene00047324	21ur-2339	IV	16747706	16747726	-1	0.0487803	4.47602	0	0	0	2.22925	15.699
WBGene00047325	21ur-2679	IV	15296717	15296737	-1	0.0206733	1.36993	19.7812	17.6368	2.76233	37.8972	35.0209
WBGene00047326	21ur-4876	IV	17200621	17200641	-1	3.72397e-09	-6.00915	127.165	179.307	132.592	0	3.62285
WBGene00047327	21ur-53	IV	16774947	16774967	1	1	0.23022	5.65176	0	0	4.45849	0
WBGene00047328	21ur-3017	IV	15291167	15291187	1	0.469224	1.57134	0	1.46973	2.76233	6.68774	2.41524
WBGene00047329	21ur-4601	IV	16438574	16438594	-1	0.000586779	1.73887	14.1294	13.2276	30.3857	75.7944	49.5123
WBGene00047330	21ur-1112	IV	13833948	13833968	-1	0.288519	0.683532	25.4329	20.5762	16.574	42.3557	26.5676
WBGene00047331	21ur-2998	IV	14287105	14287125	1	3.29635e-06	-2.0058	124.339	95.5325	82.87	24.5217	25.36
WBGene00047332	21ur-88	IV	14328832	14328852	-1	0.000209832	1.06612	237.374	299.825	223.749	514.956	554.297
WBGene00047333	21ur-974	IV	15879095	15879115	-1	0.000118114	-6.62162	39.5623	27.9249	22.0987	0	0
WBGene00047334	21ur-1870	IV	15768841	15768861	1	5.50912e-06	-3.01339	48.04	49.9709	82.87	13.3755	3.62285
WBGene00047335	21ur-867	IV	15216970	15216990	-1	7.55242e-07	-2.01063	166.727	255.733	165.74	28.9802	65.2114
WBGene00047336	21ur-2993	IV	14920659	14920679	1	0.449679	-2.13181	2.82588	4.40919	2.76233	0	1.20762
WBGene00047337	21ur-3289	IV	17056010	17056030	1	1.02891e-08	-3.20046	121.513	74.9563	74.583	15.6047	6.03809
WBGene00047338	21ur-2291	IV	17158015	17158035	-1	8.96129e-06	2.04371	16.9553	17.6368	13.8117	69.1066	66.419
WBGene00047339	21ur-3628	IV	14506799	14506819	-1	3.62878e-05	-0.939347	726.252	655.5	814.888	354.45	404.552
WBGene00047340	21ur-429	IV	13732433	13732453	1	0.000740944	-6.01353	22.6071	10.2881	27.6233	0	0
WBGene00047341	21ur-5283	IV	15566414	15566434	1	0.317449	0.757299	8.47764	14.6973	13.8117	31.2094	14.4914
WBGene00047342	21ur-3754	IV	16272794	16272814	-1	1.76078e-05	-7.11635	31.0847	39.6827	55.2467	0	0
WBGene00047343	21ur-1181	IV	13627029	13627049	-1	0.035651	2.93258	2.82588	1.46973	0	17.834	6.03809
WBGene00047344	21ur-3285	IV	16023759	16023779	-1	0.349611	0.933417	5.65176	5.87892	19.3363	22.2925	15.699
WBGene00047345	21ur-5309	IV	16176140	16176160	-1	0.875119	1.19996	0	0	0	2.22925	0
WBGene00047346	21ur-2264	IV	16457823	16457843	-1	1.72568e-07	1.11746	293.892	327.75	339.767	829.279	572.411
WBGene00047347	21ur-2246	IV	16115580	16115600	-1	2.91503e-27	-5.57878	409.753	436.51	378.44	6.68774	9.66094
WBGene00047348	21ur-3320	IV	16375191	16375211	-1	0.239435	0.412887	381.494	534.982	812.126	764.631	768.045
WBGene00047349	21ur-420	IV	15061274	15061294	1	0.158102	0.889117	25.4329	24.9854	33.148	71.3359	33.8133
WBGene00047350	21ur-3962	IV	5603867	5603887	-1	0.445853	1.80876	2.82588	1.46973	0	6.68774	3.62285
WBGene00047351	21ur-2310	IV	15408444	15408464	-1	1	0	0	0	0	0	0
WBGene00047352	21ur-3805	IV	17166436	17166456	-1	0.000582255	1.05083	90.4282	66.1379	46.9597	120.379	155.783
WBGene00047353	21ur-1879	IV	14016931	14016951	-1	0.506045	1.97998	0	0	0	2.22925	1.20762
WBGene00047354	21ur-478	IV	16273671	16273691	-1	0.233359	-2.70046	5.65176	4.40919	5.52467	0	1.20762
WBGene00047355	21ur-886	IV	5518665	5518685	-1	9.53255e-09	1.3801	138.468	135.215	121.543	325.47	359.87
WBGene00047356	21ur-4472	IV	15608923	15608943	1	0.000203813	1.05843	336.28	282.188	218.224	532.79	626.754
WBGene00047357	21ur-665	IV	5422742	5422762	-1	0.287458	1.33154	2.82588	4.40919	2.76233	11.1462	7.24571
WBGene00047358	21ur-1739	IV	14853439	14853459	1	2.01829e-05	-2.94486	48.04	67.6076	71.8207	2.22925	12.0762
WBGene00047359	21ur-2635	IV	14869442	14869462	-1	4.57455e-10	-2.38549	124.339	120.518	179.552	28.9802	25.36
WBGene00047360	21ur-2332	IV	16598681	16598701	1	6.52603e-11	-1.58224	2102.46	1851.86	1693.31	508.268	742.685
WBGene00047361	21ur-4145	IV	15717048	15717068	1	0.152533	-0.45602	618.868	546.74	417.112	345.533	421.459
WBGene00047362	21ur-124	IV	15097953	15097973	1	0.0199694	0.830278	39.5623	49.9709	71.8207	100.316	90.5714
WBGene00047363	21ur-1347	IV	5214660	5214680	1	0.622425	0.768945	5.65176	5.87892	2.76233	6.68774	9.66094
WBGene00047364	21ur-4975	IV	4985802	4985822	-1	0.81543	0.726456	2.82588	0	5.52467	4.45849	3.62285
WBGene00047365	21ur-3724	IV	16216656	16216676	1	3.17317e-07	-3.8689	79.1247	58.7892	63.5337	0	7.24571
WBGene00047366	21ur-3168	IV	16773735	16773755	1	0.532737	-0.432608	59.3435	55.8498	16.574	35.6679	31.3981
WBGene00047367	21ur-928	IV	14649446	14649466	1	0.322085	0.357513	421.056	411.525	278.996	436.932	513.238
WBGene00047368	21ur-4726	IV	16104755	16104775	-1	1	0	0	0	0	0	0
WBGene00047369	21ur-4191	IV	14515432	14515452	-1	0.801052	1.6468	0	0	0	0	2.41524
WBGene00047370	21ur-3368	IV	6498286	6498306	1	0.00672662	-5.24044	14.1294	11.7578	8.287	0	0
WBGene00047371	21ur-1927	IV	15956448	15956468	-1	0.135688	-3.18483	0	8.81839	13.8117	2.22925	0
WBGene00047372	21ur-4650	IV	4969308	4969328	1	0.552003	0.594991	11.3035	14.6973	0	11.1462	16.9067
WBGene00047373	21ur-246	IV	15758556	15758576	1	4.79108e-20	-3.12529	1229.26	918.582	690.583	80.2529	132.838
WBGene00047374	21ur-1223	IV	15247907	15247927	-1	0.754965	1.30822	0	1.46973	0	4.45849	0
WBGene00047375	21ur-4202	IV	16606772	16606792	1	0.189298	2.99771	0	0	0	4.45849	2.41524
WBGene00047376	21ur-1065	IV	14972050	14972070	-1	0.0101229	1.18443	45.2141	38.213	16.574	53.5019	96.6094
WBGene00047377	21ur-3405	IV	6021565	6021585	1	0.0192076	0.7524	118.687	161.67	149.166	225.154	259.638
WBGene00047378	21ur-2481	IV	5079651	5079671	-1	0.321604	-0.511046	59.3435	70.5471	38.6727	37.8972	42.2666
WBGene00047379	21ur-465	IV	14011090	14011110	1	2.94639e-06	-3.32021	64.9953	70.5471	55.2467	8.91698	4.83047
WBGene00047380	21ur-539	IV	14355456	14355476	1	#N/A	#N/A	0	0	0	0	0
WBGene00047381	21ur-2041	IV	15898597	15898617	-1	0.814821	-0.994213	2.82588	0	2.76233	0	1.20762
WBGene00047382	21ur-254	IV	6131197	6131217	-1	0.0015575	1.16612	36.7365	48.5011	33.148	109.233	77.2876
WBGene00047383	21ur-4493	IV	16616602	16616622	1	0.000245922	-3.87669	31.0847	33.8038	38.6727	2.22925	2.41524
WBGene00047384	21ur-2790	IV	15337843	15337863	-1	3.35146e-37	-4.17385	562.35	580.544	499.982	17.834	38.6438
WBGene00047385	21ur-2111	IV	14680336	14680356	1	3.63711e-06	-5.40828	59.3435	67.6076	77.3453	4.45849	0
WBGene00047386	21ur-1855	IV	4843081	4843101	-1	1	0	0	0	0	0	0
WBGene00047387	21ur-1943	IV	14572574	14572594	1	5.97103e-06	-1.07351	299.543	246.915	254.135	131.526	121.969
WBGene00047388	21ur-2404	IV	5714189	5714209	1	0.28083	0.423887	59.3435	66.1379	69.0583	89.1698	85.7409
WBGene00047389	21ur-4324	IV	15690402	15690422	1	1.20242e-14	-2.00606	528.44	574.665	477.884	113.692	146.122
WBGene00047390	21ur-2959	IV	16532473	16532493	-1	0.480795	0.969106	2.82588	2.93946	8.287	8.91698	8.45333
WBGene00047391	21ur-1902	IV	14266262	14266282	1	0.49924	-0.397211	53.6917	86.7141	69.0583	57.9604	50.72
WBGene00047392	21ur-5402	IV	5497739	5497759	1	1.82339e-12	-2.79281	517.136	664.318	698.87	60.1896	117.139
WBGene00047393	21ur-3318	IV	6496145	6496165	1	0.0019368	-5.08934	31.0847	23.5157	27.6233	0	1.20762
WBGene00047394	21ur-255	IV	6131753	6131773	1	1	0	0	0	0	0	0
WBGene00047395	21ur-3348	IV	16190285	16190305	1	0.000187393	-5.82936	48.04	35.2735	55.2467	0	1.20762
WBGene00047396	21ur-525	IV	5514405	5514425	1	1	0.054403	53.6917	55.8498	33.148	35.6679	61.5885
WBGene00047397	21ur-3733	IV	13629642	13629662	-1	3.05147e-06	1.69543	45.2141	24.9854	13.8117	95.8576	83.3256
WBGene00047398	21ur-2766	IV	13995662	13995682	1	0.733862	1.2505	0	1.46973	0	4.45849	0
WBGene00047399	21ur-3672	IV	15272925	15272945	-1	0.696421	-0.575012	1042.75	213.111	1367.36	1003.16	171.482
WBGene00047400	21ur-4952	IV	16246907	16246927	-1	1	0.076536	0	1.46973	0	2.22925	0
WBGene00047401	21ur-1911	IV	16105130	16105150	-1	0.0139262	1.13277	22.6071	23.5157	27.6233	44.5849	60.3809
WBGene00047402	21ur-4242	IV	15064994	15065014	-1	4.77488e-05	1.54726	45.2141	32.3341	16.574	93.6283	90.5714
WBGene00047403	21ur-4111	IV	16619747	16619767	-1	1	-0.0295294	36.7365	38.213	38.6727	33.4387	39.8514
WBGene00047404	21ur-3579	IV	16705054	16705074	1	0.991739	0.231906	8.47764	2.93946	0	2.22925	6.03809
WBGene00047405	21ur-639	IV	13959123	13959143	1	0.885051	1.22496	0	0	0	2.22925	0
WBGene00047406	21ur-4593	IV	15093741	15093761	1	0.558493	-2.0687	0	2.93946	0	0	0
WBGene00047407	21ur-2830	IV	14355243	14355263	-1	0.853947	-0.215403	33.9106	33.8038	44.1973	40.1264	25.36
WBGene00047408	21ur-4016	IV	14539451	14539471	1	5.49011e-05	-6.16343	67.8212	57.3195	46.9597	0	1.20762
WBGene00047409	21ur-2451	IV	14757099	14757119	1	1	0	0	0	0	0	0
WBGene00047410	21ur-3710	IV	16715797	16715817	1	0.647534	0.51336	11.3035	5.87892	13.8117	17.834	10.8686
WBGene00047411	21ur-1124	IV	15569423	15569443	-1	2.79247e-06	1.33302	169.553	173.428	102.206	401.264	356.247
WBGene00047412	21ur-695	IV	16558238	16558258	1	0.343648	-2.66417	5.65176	1.46973	8.287	0	1.20762
WBGene00047413	21ur-4267	IV	13632908	13632928	1	0.07932	-2.67127	8.47764	14.6973	8.287	4.45849	0
WBGene00047414	21ur-4479	IV	14924883	14924903	1	0.950517	-0.655873	0	2.93946	0	0	1.20762
WBGene00047415	21ur-3204	IV	13639937	13639957	-1	0.0102867	1.52633	14.1294	11.7578	8.287	33.4387	32.6057
WBGene00047416	21ur-2042	IV	14008217	14008237	1	0.00021286	-2.58559	64.9953	38.213	38.6727	6.68774	8.45333
WBGene00047417	21ur-3356	IV	14149060	14149080	-1	0.000476801	-5.51268	28.2588	38.213	44.1973	2.22925	0
WBGene00047418	21ur-160	IV	14692398	14692418	-1	0.000637883	1.04907	98.9059	82.3049	85.6323	160.506	201.672
WBGene00047419	21ur-4390	IV	16149734	16149754	1	0.130424	2.04261	2.82588	0	5.52467	8.91698	9.66094
WBGene00047420	21ur-3251	IV	17051947	17051967	1	0.427487	-0.611072	53.6917	20.5762	55.2467	40.1264	16.9067
WBGene00047421	21ur-3248	IV	15117048	15117068	1	0.0489383	3.35217	2.82588	0	0	11.1462	6.03809
WBGene00047422	21ur-5192	IV	14970752	14970772	1	0.843994	0.468526	2.82588	13.2276	0	17.834	1.20762
WBGene00047423	21ur-3411	IV	5777190	5777210	-1	0.00980019	1.7507	2.82588	13.2276	13.8117	44.5849	27.7752
WBGene00047424	21ur-2208	IV	15575844	15575864	-1	0.11274	-3.73727	5.65176	5.87892	0	0	0
WBGene00047425	21ur-3034	IV	15239983	15240003	-1	0.772967	-1.44461	2.82588	0	0	0	0
WBGene00047426	21ur-2328	IV	13899128	13899148	-1	1	0	0	0	0	0	0
WBGene00047427	21ur-3744	IV	14030822	14030842	-1	1	0	0	0	0	0	0
WBGene00047428	21ur-5046	IV	15055571	15055591	-1	0.913471	-1.47513	2.82588	0	0	0	0
WBGene00047429	21ur-1797	IV	14394498	14394518	-1	1	0.0397009	98.9059	88.1839	49.722	71.3359	90.5714
WBGene00047430	21ur-181	IV	13983432	13983452	1	0.97873	0.868421	0	0	0	0	1.20762
WBGene00047431	21ur-1170	IV	17019021	17019041	1	4.00192e-27	-4.73765	457.793	476.193	350.816	22.2925	12.0762
WBGene00047432	21ur-2655	IV	14544895	14544915	-1	1	0	0	0	0	0	0
WBGene00047433	21ur-3567	IV	5876806	5876826	1	0.792528	-1.44849	2.82588	0	0	0	0
WBGene00047434	21ur-2807	IV	15104858	15104878	-1	1	0	0	0	0	0	0
WBGene00047435	21ur-2976	IV	14239631	14239651	1	0.00681409	1.25245	25.4329	45.5617	16.574	78.0236	71.2495
WBGene00047436	21ur-936	IV	14220194	14220214	1	0.277935	-3.54239	0	0	11.0493	0	0
WBGene00047437	21ur-1299	IV	14702301	14702321	1	0.0274549	-2.70624	28.2588	8.81839	11.0493	2.22925	2.41524
WBGene00047438	21ur-2589	IV	13704775	13704795	-1	1.26152e-05	-1.92038	141.294	114.639	102.206	44.5849	21.7371
WBGene00047439	21ur-387	IV	16802116	16802136	1	7.87877e-07	-7.37978	152.598	139.624	110.493	2.22925	0
WBGene00047440	21ur-468	IV	14312259	14312279	-1	0.00478659	1.07043	45.2141	48.5011	46.9597	91.3991	105.063
WBGene00047441	21ur-2592	IV	16047459	16047479	1	2.29542e-74	-7.84137	3181.94	3320.12	3521.98	8.91698	18.1143
WBGene00047442	21ur-3244	IV	14940483	14940503	1	0.125994	0.479982	237.374	198.414	146.404	236.3	301.905
WBGene00047443	21ur-3829	IV	15890587	15890607	1	0.0394118	3.39453	0	0	2.76233	13.3755	4.83047
WBGene00047444	21ur-3953	IV	5105590	5105610	-1	1	0	0	0	0	0	0
WBGene00047445	21ur-1336	IV	6390377	6390397	1	7.64221e-05	-6.08522	33.9106	63.1984	63.5337	0	1.20762
WBGene00047446	21ur-2780	IV	16911760	16911780	1	1.14353e-05	1.0577	169.553	160.201	151.928	367.826	304.32
WBGene00047447	21ur-471	IV	15569637	15569657	-1	4.77614e-25	-3.6278	276.936	289.537	265.184	17.834	25.36
WBGene00047448	21ur-4646	IV	6164919	6164939	1	3.65344e-05	-6.93707	39.5623	42.6222	27.6233	0	0
WBGene00047449	21ur-413	IV	15698781	15698801	1	0.00212794	-1.36033	50.8659	88.1839	121.543	35.6679	32.6057
WBGene00047450	21ur-3773	IV	15582979	15582999	1	0.112784	1.42716	16.9553	4.40919	16.574	51.2727	14.4914
WBGene00047451	21ur-4108	IV	14179283	14179303	1	0.000116246	1.10411	183.682	188.126	132.592	296.49	426.289
WBGene00047452	21ur-3738	IV	14939384	14939404	1	5.57023e-25	-5.18237	296.718	377.721	320.431	2.22925	13.2838
WBGene00047453	21ur-802	IV	14857042	14857062	1	0.0245801	0.700234	73.4729	77.8958	88.3947	140.442	120.762
WBGene00047454	21ur-4671	IV	14809271	14809291	1	0.000611306	1.14047	67.8212	48.5011	66.296	160.506	106.27
WBGene00047455	21ur-3386	IV	6057117	6057137	-1	0.326602	2.01743	2.82588	0	2.76233	11.1462	2.41524
WBGene00047456	21ur-1721	IV	15597170	15597190	1	1	0.186009	2.82588	2.93946	0	2.22925	2.41524
WBGene00047457	21ur-961	IV	14398613	14398633	-1	0.00170719	-5.10095	28.2588	26.4552	27.6233	0	1.20762
WBGene00047458	21ur-3026	IV	5795426	5795446	1	0.00211322	1.17843	36.7365	39.6827	22.0987	75.7944	77.2876
WBGene00047459	21ur-2465	IV	14582841	14582861	-1	0.779368	-1.44584	0	0	2.76233	0	0
WBGene00047460	21ur-4467	IV	14338847	14338867	1	1.12255e-14	-2.03538	989.059	1068.49	831.462	191.715	274.129
WBGene00047461	21ur-1665	IV	15054811	15054831	-1	0.0263683	1.21371	14.1294	16.167	24.861	44.5849	39.8514
WBGene00047462	21ur-2795	IV	17225880	17225900	1	0.962459	-0.289308	5.65176	2.93946	0	2.22925	2.41524
WBGene00047463	21ur-4614	IV	14931491	14931511	-1	6.8716e-05	1.22378	45.2141	70.5471	71.8207	147.13	149.745
WBGene00047464	21ur-4383	IV	16186121	16186141	1	0.859091	-0.906799	0	0	5.52467	2.22925	0
WBGene00047465	21ur-1956	IV	14749615	14749635	-1	0.0432431	0.916928	31.0847	17.6368	38.6727	51.2727	51.9276
WBGene00047466	21ur-1676	IV	13750862	13750882	-1	3.98978e-05	1.07777	647.127	654.03	527.606	1052.2	1519.18
WBGene00047467	21ur-2426	IV	5528804	5528824	-1	3.43177e-12	-2.39196	197.812	273.37	259.659	62.4189	35.0209
WBGene00047468	21ur-29	IV	13925921	13925941	1	0.913471	-1.47513	2.82588	0	0	0	0
WBGene00047469	21ur-5292	IV	14560449	14560469	1	1	-0.269416	2.82588	0	2.76233	0	2.41524
WBGene00047470	21ur-4435	IV	14363369	14363389	-1	2.86289e-08	1.30336	152.598	152.852	91.157	334.387	328.472
WBGene00047471	21ur-990	IV	14743675	14743695	1	0.912277	-0.336317	2.82588	11.7578	11.0493	6.68774	7.24571
WBGene00047472	21ur-3129	IV	13946211	13946231	1	1.21673e-07	1.49525	104.558	76.426	110.493	321.011	220.994
WBGene00047473	21ur-135	IV	15777129	15777149	1	0.399926	2.33239	0	0	2.76233	8.91698	0
WBGene00047474	21ur-4101	IV	13692200	13692220	1	0.0127455	-2.09638	31.0847	16.167	38.6727	8.91698	4.83047
WBGene00047475	21ur-4440	IV	16178838	16178858	1	1	0.0498721	0	1.46973	11.0493	4.45849	3.62285
WBGene00047476	21ur-1644	IV	14378439	14378459	-1	0.0701364	-1.35392	16.9553	35.2735	13.8117	6.68774	10.8686
WBGene00047477	21ur-4314	IV	14124072	14124092	-1	3.59612e-41	-3.72997	3444.75	3123.18	2635.27	225.154	236.693
WBGene00047478	21ur-69	IV	15902148	15902168	-1	1	0	0	0	0	0	0
WBGene00047479	21ur-4123	IV	16993915	16993935	-1	#N/A	#N/A	0	0	0	0	0
WBGene00047480	21ur-2514	IV	16698976	16698996	-1	2.4068e-15	-5.06823	197.812	199.883	149.166	4.45849	6.03809
WBGene00047481	21ur-1924	IV	15602022	15602042	-1	0.418702	0.395102	45.2141	47.0314	82.87	75.7944	74.8723
WBGene00047482	21ur-4152	IV	4886776	4886796	1	2.29691e-12	-2.22756	180.856	198.414	190.601	49.0434	35.0209
WBGene00047483	21ur-1370	IV	16986835	16986855	1	0.00132939	-5.87254	8.47764	14.6973	30.3857	0	0
WBGene00047484	21ur-3711	IV	16187999	16188019	-1	4.6123e-06	-7.51744	64.9953	42.6222	60.7713	0	0
WBGene00047485	21ur-3445	IV	16716455	16716475	1	0.746604	-1.98035	0	2.93946	0	0	0
WBGene00047486	21ur-4802	IV	14401748	14401768	1	0.648073	1.09933	2.82588	1.46973	0	2.22925	3.62285
WBGene00047487	21ur-913	IV	15387749	15387769	-1	1.98141e-14	1.77832	228.896	194.005	129.83	586.292	678.681
WBGene00047488	21ur-5449	IV	15858875	15858895	-1	0.215527	3.0049	0	0	0	4.45849	2.41524
WBGene00047489	21ur-2493	IV	14730357	14730377	-1	1	0	0	0	0	0	0
WBGene00047490	21ur-3688	IV	14457400	14457420	-1	0.000252279	-2.28792	42.3882	49.9709	33.148	11.1462	7.24571
WBGene00047491	21ur-5396	IV	16148140	16148160	-1	3.60187e-08	-3.46414	98.9059	79.3655	96.6817	2.22925	12.0762
WBGene00047492	21ur-772	IV	16112080	16112100	-1	0.773069	-0.358867	22.6071	16.167	30.3857	24.5217	12.0762
WBGene00047493	21ur-2146	IV	14565446	14565466	-1	0.00019624	-5.83888	31.0847	30.8644	80.1077	2.22925	0
WBGene00047494	21ur-433	IV	16590138	16590158	-1	1	0.0255155	2.82588	2.93946	0	0	3.62285
WBGene00047495	21ur-78	IV	16614150	16614170	1	1.58723e-09	-4.33264	93.2541	133.746	104.969	6.68774	4.83047
WBGene00047496	21ur-3664	IV	15817624	15817644	-1	0.754961	-0.856579	5.65176	1.46973	5.52467	0	3.62285
WBGene00047497	21ur-4053	IV	16089311	16089331	-1	0.852532	-1.39701	0	1.46973	0	0	0
WBGene00047498	21ur-1090	IV	15346784	15346804	1	0.00623721	1.08897	124.339	91.1233	35.9103	158.276	198.049
WBGene00047499	21ur-3762	IV	14913878	14913898	-1	0.220135	-3.38135	5.65176	1.46973	2.76233	0	0
WBGene00047500	21ur-4510	IV	15701663	15701683	1	0.019294	0.861034	412.579	473.253	502.745	713.359	966.094
WBGene00047501	21ur-751	IV	6023954	6023974	1	0.0571577	1.12096	39.5623	27.9249	13.8117	37.8972	77.2876
WBGene00047502	21ur-2650	IV	5495645	5495665	1	0.40307	0.547718	31.0847	32.3341	5.52467	35.6679	35.0209
WBGene00047503	21ur-3906	IV	16725283	16725303	1	0.0393889	1.34603	16.9553	4.40919	30.3857	42.3557	37.4362
WBGene00047504	21ur-1824	IV	4960014	4960034	-1	0.00208346	-5.69321	16.9553	20.5762	8.287	0	0
WBGene00047505	21ur-4000	IV	16475766	16475786	-1	4.88156e-13	-4.12147	124.339	121.988	121.543	6.68774	7.24571
WBGene00047506	21ur-850	IV	15412161	15412181	1	0.000218811	1.06623	859.068	845.095	627.05	1284.05	1968.42
WBGene00047507	21ur-125	IV	17158376	17158396	1	0.155087	-2.60227	19.7812	7.34866	0	0	2.41524
WBGene00047508	21ur-1253	IV	14662131	14662151	-1	0.901218	0.471042	2.82588	1.46973	2.76233	2.22925	3.62285
WBGene00047509	21ur-542	IV	6044470	6044490	1	0.0861168	-3.31285	2.82588	5.87892	16.574	2.22925	0
WBGene00047510	21ur-2800	IV	17235436	17235456	-1	0.246549	-2.49862	5.65176	2.93946	5.52467	0	1.20762
WBGene00047511	21ur-518	IV	14265312	14265332	1	0.00243321	0.695632	370.19	293.946	328.718	539.478	526.521
WBGene00047512	21ur-2253	IV	14039457	14039477	1	0.869731	0.913119	0	0	0	0	1.20762
WBGene00047513	21ur-1884	IV	15758263	15758283	1	0.00700166	0.75354	259.981	251.324	143.641	327.699	410.59
WBGene00047514	21ur-1589	IV	16166988	16167008	-1	0.0210564	0.811488	64.9953	58.7892	44.1973	80.2529	113.516
WBGene00047515	21ur-1786	IV	13711413	13711433	1	4.18204e-05	-4.14729	39.5623	41.1525	44.1973	2.22925	2.41524
WBGene00047516	21ur-4743	IV	15135100	15135120	1	1.73658e-09	-3.9321	90.4282	102.881	157.453	4.45849	9.66094
WBGene00047517	21ur-575	IV	15225453	15225473	1	3.58191e-06	1.12992	96.08	107.29	121.543	238.529	235.486
[truncated: 12,715 more rows]
