# Supplementary material for: SNPC-1.3 is a sex-specific transcription factor that drives male piRNA expression in C. elegans
Source: eLife. 2021 Feb 15;10:e60681. doi: 10.7554/eLife.60681 (PMC7884074; doi:10.7554/eLife.60681)
Supplement: Supplementary file 3. — Related to Figure 5. [file elife-60681-supp3.xlsx]

## Sheet: snpc-1.3(2xtbs)72h_vs_WT72h
gene ID	gene name	chromosome	gene start	gene end	strand	adj. pvalue (BH)	log2(fold change)	WT 72h replicate 1	WT 72h replicate 2	WT 72h replicate 3	snpc-1.3(2xtbs) 72h replicate 1	snpc-1.3(2xtbs) 72h replicate 2	snpc-1.3(2xtbs) 72h replicate 3
WBGene00045518	21ur-5153	IV	5723096	5723116	-1	0.94915	0.666626	0.502747	1.79359	0.711217	1.27777	2.23763	1.41634
WBGene00045519	21ur-4348	IV	15836817	15836837	1	0.968966	-0.287154	4.52472	19.7295	14.2243	9.37034	12.3069	9.91441
WBGene00045520	21ur-3279	IV	15576143	15576163	1	0.974453	1.75631	0	0	0	0.425925	0.559406	0
WBGene00045521	21ur-4491	IV	16545939	16545959	1	0.825609	0.63123	2.01099	3.13879	2.13365	1.27777	5.59406	4.9572
WBGene00045522	21ur-1293	IV	14284757	14284777	-1	0.917233	-0.556095	4.02197	4.03559	4.97852	0.851849	3.35644	4.9572
WBGene00045523	21ur-4900	IV	15101897	15101917	-1	0.563134	1.88592	0	1.3452	0	0.425925	1.11881	4.24903
WBGene00045524	21ur-2872	IV	15745804	15745824	1	1	0.00792224	114.626	110.306	153.623	133.74	124.188	120.389
WBGene00045525	21ur-4886	IV	14087254	14087274	-1	9.70497e-11	1.97777	25.1373	32.2847	22.0477	117.981	111.322	85.6888
WBGene00045526	21ur-3726	IV	14006014	14006034	1	0.498565	-0.474747	30.6675	29.1459	41.2506	21.7222	24.6139	26.2024
WBGene00045527	21ur-3449	IV	15955239	15955259	-1	0.830026	0.886755	2.51373	3.13879	0.711217	2.12962	4.47525	5.66538
WBGene00045528	21ur-4318	IV	5914546	5914566	-1	0.791859	2.00048	0	0.448399	0	0.425925	0.559406	1.41634
WBGene00045529	21ur-3987	IV	13689238	13689258	-1	0.787177	0.222578	491.686	471.267	639.384	848.442	523.604	494.304
WBGene00045530	21ur-770	IV	16391830	16391850	-1	2.02623e-06	1.74596	85.4669	104.477	135.131	554.98	341.238	189.79
WBGene00045531	21ur-3262	IV	15774176	15774196	1	0.985476	0.140404	8.54669	4.03559	1.42243	3.4074	2.79703	9.91441
WBGene00045532	21ur-116	IV	5101205	5101225	-1	0.236576	2.37726	0.502747	0.448399	2.13365	4.68517	6.71288	3.54086
WBGene00045533	21ur-338	IV	16887155	16887175	-1	0.834789	-0.203779	56.8104	47.0819	40.5394	41.3147	47.5495	36.8249
WBGene00045534	21ur-248	IV	17172196	17172216	-1	0.00362888	1.47318	6.03296	6.72598	7.82339	15.3333	21.8169	19.8288
WBGene00045535	21ur-2337	IV	14055385	14055405	-1	0.648066	-0.816633	6.53571	8.51957	7.11217	5.53702	3.35644	3.54086
WBGene00045536	21ur-2148	IV	14561149	14561169	1	0.897296	1.51599	0	0.448399	0	0.425925	0.559406	0.708172
WBGene00045537	21ur-3280	IV	5759813	5759833	1	0.868624	-0.134464	145.294	132.278	125.885	111.166	124.188	133.845
WBGene00045538	21ur-783	IV	16661836	16661856	1	0.824989	0.220432	93.5109	85.1957	142.955	153.333	105.168	113.308
WBGene00045539	21ur-2502	IV	15396845	15396865	1	0.814836	-0.16714	293.101	301.772	352.764	319.018	291.451	230.864
WBGene00045540	21ur-2533	IV	14259503	14259523	1	3.90586e-05	1.74799	10.5577	13.452	4.97852	40.4628	35.2426	24.0779
WBGene00045541	21ur-2515	IV	16346305	16346325	-1	0.924526	-0.30801	12.0659	14.7972	9.24582	6.81479	8.3911	14.8716
WBGene00045542	21ur-194	IV	16062799	16062819	-1	0.165441	0.52199	324.272	334.505	463.002	620.146	574.51	412.864
WBGene00045543	21ur-1754	IV	13631496	13631516	1	0.974453	0.986352	0	0	0	0	0.559406	0
WBGene00045544	21ur-3162	IV	6188675	6188695	1	0.959526	-0.168392	32.1758	28.6975	21.3365	19.1666	22.9357	32.5759
WBGene00045545	21ur-4859	IV	15298501	15298521	1	0.572267	1.05575	1.00549	1.79359	0.711217	2.12962	2.79703	2.83269
WBGene00045546	21ur-3313	IV	16807628	16807648	-1	0.976576	-0.148806	5.53021	1.79359	3.55609	2.98147	3.91584	2.83269
WBGene00045547	21ur-2522	IV	5899411	5899431	-1	0.304659	0.89658	4.02197	3.58719	5.68974	8.51849	8.3911	7.08172
WBGene00045548	21ur-2768	IV	16717897	16717917	1	0.694257	0.73975	1.50824	3.58719	3.55609	5.53702	5.03466	3.54086
WBGene00045549	21ur-4660	IV	6992052	6992072	-1	#N/A	#N/A	0	0	0	0	0	0
WBGene00045550	21ur-380	IV	16891832	16891852	1	0.974453	0.555156	1.00549	0.896797	0	0.425925	0.559406	2.12452
WBGene00045551	21ur-127	IV	15583334	15583354	1	#N/A	#N/A	0	0	0	0	0	0
WBGene00045552	21ur-3009	IV	13839715	13839735	-1	0.0253075	-0.567764	225.23	216.128	204.119	150.351	163.906	120.389
WBGene00045553	21ur-4396	IV	14151064	14151084	1	1	0.00535207	487.161	522.833	710.506	713.424	495.634	514.841
WBGene00045554	21ur-3929	IV	15605848	15605868	1	0.825609	-0.175281	168.42	149.765	192.029	182.722	134.817	131.72
WBGene00045555	21ur-4158	IV	16203925	16203945	-1	1	-0.0748836	0.502747	0.448399	0.711217	0.425925	1.11881	0
WBGene00045556	21ur-972	IV	15630784	15630804	1	1	-0.0962762	4.52472	3.13879	3.55609	2.98147	3.35644	4.24903
WBGene00045557	21ur-4509	IV	15655850	15655870	-1	0.367283	1.33355	2.51373	2.24199	2.13365	3.83332	6.71288	7.08172
WBGene00045558	21ur-4358	IV	13726773	13726793	-1	0.0819724	-0.572275	75.412	73.5374	64.0095	49.4073	41.3961	53.1129
WBGene00045559	21ur-4032	IV	17151826	17151846	-1	0.974453	-0.10036	1569.57	1524.56	2189.13	2164.97	1612.77	1147.24
WBGene00045560	21ur-3396	IV	14509444	14509464	-1	0.985476	-0.0752276	20.6126	21.5231	10.6683	10.6481	16.2228	24.786
WBGene00045561	21ur-4184	IV	14159840	14159860	-1	0.978054	0.19823	1.50824	2.69039	3.55609	3.83332	3.35644	1.41634
WBGene00045562	21ur-231	IV	15907905	15907925	-1	0.932766	0.942534	1.00549	0.448399	0	0	1.67822	1.41634
WBGene00045563	21ur-4606	IV	16898307	16898327	1	0.0462231	-0.502313	274.5	239.893	233.279	162.703	180.688	185.541
WBGene00045564	21ur-4026	IV	14432370	14432390	1	2.00834e-07	2.13843	4.52472	7.17438	8.5346	36.6295	25.1733	24.786
WBGene00045565	21ur-1557	IV	14342516	14342536	1	0.895489	1.40195	0.502747	0.448399	0	1.27777	0	1.41634
WBGene00045566	21ur-4925	IV	16984283	16984303	1	1	0.0746273	0	2.24199	1.42243	0.851849	1.67822	1.41634
WBGene00045567	21ur-4269	IV	15777866	15777886	1	1.95351e-05	1.85466	7.5412	5.82918	9.24582	24.2777	21.2574	35.4086
WBGene00045568	21ur-3115	IV	14122587	14122607	-1	#N/A	#N/A	0	0	0	0	0	0
WBGene00045569	21ur-4858	IV	14039587	14039607	-1	0.873367	-0.217575	31.673	35.8719	33.4272	27.6851	29.6485	29.7432
WBGene00045570	21ur-422	IV	15182599	15182619	-1	0.974453	0.0792105	129.206	106.27	141.532	150.777	122.51	122.514
WBGene00045571	21ur-3283	IV	15424750	15424770	1	0.11183	-0.650327	104.069	86.5409	69.6993	60.4813	43.6337	62.3191
WBGene00045572	21ur-66	IV	14979662	14979682	1	0.000108426	1.1881	379.574	468.577	647.207	1479.66	1067.35	855.472
WBGene00045573	21ur-3960	IV	14977301	14977321	-1	0.430691	-0.346383	118.145	118.377	120.907	87.7405	84.4704	109.767
WBGene00045574	21ur-3455	IV	4986105	4986125	-1	0.740472	0.921958	1.50824	2.69039	0	0.851849	4.47525	3.54086
WBGene00045575	21ur-3399	IV	16158130	16158150	1	0.379958	0.365704	285.057	280.249	238.969	247.036	424.03	367.541
WBGene00045576	21ur-1907	IV	14583398	14583418	1	0.565111	0.395212	21.6181	26.9039	27.0262	32.3703	33.5644	33.2841
WBGene00045577	21ur-341	IV	13746337	13746357	-1	0.435061	-2.11314	2.51373	5.82918	0.711217	0.851849	0.559406	0.708172
WBGene00045578	21ur-4400	IV	14725934	14725954	-1	0.00932377	1.06574	13.0714	13.452	9.24582	28.111	19.0198	29.0351
WBGene00045579	21ur-213	IV	13939645	13939665	-1	0.543134	0.417325	21.6181	25.5587	26.315	23.8518	34.1238	41.074
WBGene00045580	21ur-3922	IV	15671231	15671251	-1	0.847745	-0.15967	224.728	239.445	211.231	241.925	184.604	177.043
WBGene00045581	21ur-3683	IV	16814136	16814156	1	0.11192	-0.68896	122.167	148.42	94.5919	68.1479	58.7377	101.269
WBGene00045582	21ur-3176	IV	15623587	15623607	-1	0.828161	-0.283004	36.7005	24.6619	27.0262	20.8703	24.0545	28.3269
WBGene00045583	21ur-4174	IV	14878399	14878419	1	1	-0.176749	1.50824	0.896797	0.711217	0.851849	0.559406	1.41634
WBGene00045584	21ur-4213	IV	5497568	5497588	-1	0.798932	0.760842	2.01099	2.24199	1.42243	1.7037	2.79703	5.66538
WBGene00045585	21ur-687	IV	13839712	13839732	-1	0.0245906	-0.567746	225.23	216.128	204.119	150.351	163.906	120.389
WBGene00045586	21ur-5133	IV	15779938	15779958	1	1	0.0757076	4.02197	2.24199	2.84487	1.27777	5.59406	2.83269
WBGene00045587	21ur-4538	IV	13840064	13840084	1	0.997444	0.257472	2.01099	0.448399	0	0	1.67822	1.41634
WBGene00045588	21ur-4731	IV	6033172	6033192	-1	1	-0.0200001	73.9037	49.7722	74.6778	55.3702	63.2129	77.1908
WBGene00045589	21ur-1571	IV	14893381	14893401	-1	0.809029	1.42524	1.00549	0.896797	0	0	3.35644	2.12452
WBGene00045590	21ur-5440	IV	15248660	15248680	-1	0.968966	2.05792	0	0	0	0	0.559406	0.708172
WBGene00045591	21ur-3641	IV	13604366	13604386	-1	0.753944	1.10714	0.502747	1.79359	2.13365	1.27777	3.35644	4.9572
WBGene00045592	21ur-4673	IV	5336132	5336152	1	0.338152	-0.563905	36.1978	34.0783	34.1384	25.5555	15.6634	29.7432
WBGene00045593	21ur-2000	IV	16109395	16109415	1	0.881267	-0.0849314	519.84	525.075	560.439	485.128	514.095	514.133
WBGene00045594	21ur-2563	IV	15975938	15975958	1	0.4132	-0.702266	42.2307	36.3203	41.9618	9.37034	26.8515	38.9495
WBGene00045595	21ur-676	IV	5284109	5284129	-1	0.724588	-0.275542	81.4449	63.2242	51.9188	60.4813	53.1436	48.8639
WBGene00045596	21ur-5434	IV	16376343	16376363	1	0.422394	2.54559	0	0.448399	0	0.425925	1.67822	1.41634
WBGene00045597	21ur-2918	IV	14639622	14639642	-1	0.939241	-0.230122	18.0989	17.4875	22.7589	17.037	13.4258	19.1206
WBGene00045598	21ur-3144	IV	5882012	5882032	-1	0.881021	-0.676306	6.53571	3.58719	2.84487	1.7037	1.11881	5.66538
WBGene00045599	21ur-3790	IV	14717683	14717703	1	8.59445e-05	1.1366	54.7994	49.3238	54.7637	158.018	109.084	79.3153
WBGene00045600	21ur-3069	IV	5717445	5717465	1	0.828881	-0.224881	40.7225	36.7687	34.8496	31.5184	29.0891	36.1168
WBGene00045601	21ur-1104	IV	14917339	14917359	1	0.801344	-1.09646	5.02747	2.69039	2.84487	0.425925	0.559406	4.24903
WBGene00045602	21ur-4930	IV	16838285	16838305	-1	0.718241	-0.694019	8.54669	8.96797	5.68974	4.68517	6.15347	3.54086
WBGene00045603	21ur-5393	IV	15439660	15439680	-1	0.747154	1.46323	1.00549	0.448399	0	1.7037	1.11881	1.41634
WBGene00045604	21ur-4121	IV	15262572	15262592	-1	0.219807	2.19506	0	1.3452	0.711217	4.25925	1.11881	4.24903
WBGene00045605	21ur-1446	IV	13889765	13889785	-1	2.50557e-06	1.57335	31.1703	22.4199	12.8019	56.648	62.6535	82.8561
WBGene00045606	21ur-4963	IV	9131636	9131656	-1	0.0750131	-0.788261	30.6675	28.2491	29.8711	19.1666	16.2228	15.5798
WBGene00045607	21ur-3239	IV	14324699	14324719	1	0.991943	0.094233	13.0714	8.51957	8.5346	10.6481	5.59406	16.288
WBGene00045608	21ur-4548	IV	15811661	15811681	-1	0.522571	1.39323	1.00549	0.896797	1.42243	1.27777	3.91584	3.54086
WBGene00045609	21ur-2932	IV	15233513	15233533	1	0.119649	-0.342047	381.585	343.473	376.945	260.666	282.5	327.884
WBGene00045610	21ur-1584	IV	16608169	16608189	-1	0.974453	0.0885792	736.021	694.569	930.983	817.775	832.397	859.721
WBGene00045611	21ur-620	IV	16373091	16373111	1	0.473852	1.1057	7.03845	8.96797	6.40095	4.25925	18.4604	26.2024
WBGene00045612	21ur-5367	IV	14405356	14405376	1	0.0267794	-1.58496	21.6181	13.452	17.7804	5.1111	5.59406	7.08172
WBGene00045613	21ur-2568	IV	15841474	15841494	1	0.974453	-0.702199	0	0.896797	0	0	0	0.708172
WBGene00045614	21ur-2293	IV	15670608	15670628	-1	0.719605	1.08304	0.502747	0.448399	2.13365	2.12962	1.67822	2.12452
WBGene00045615	21ur-310	IV	16522239	16522259	1	1.52596e-06	2.08481	5.53021	6.72598	12.8019	43.0184	36.3614	21.9533
WBGene00045616	21ur-344	IV	15208441	15208461	-1	0.355708	0.94865	5.02747	5.82918	3.55609	8.94442	9.50991	9.91441
WBGene00045617	21ur-5229	IV	5967089	5967109	1	0.975368	-0.352331	0	1.3452	1.42243	0.851849	0.559406	0.708172
WBGene00045618	21ur-3525	IV	15099767	15099787	1	0.892238	-0.305635	16.0879	15.694	12.8019	12.3518	11.1881	12.7471
WBGene00045619	21ur-5354	IV	5614160	5614180	-1	1	0.412041	1.00549	0	0	0	0	1.41634
WBGene00045620	21ur-2363	IV	14286678	14286698	-1	0.308168	-0.678274	24.1318	27.3523	24.8926	12.7777	15.104	20.537
WBGene00045621	21ur-5452	IV	15144960	15144980	-1	0.642857	-1.60228	2.51373	3.13879	4.2673	0.851849	1.67822	0.708172
WBGene00045622	21ur-2954	IV	16004254	16004274	1	0.0179466	-0.647757	153.338	139.9	163.58	109.037	90.6238	90.646
WBGene00045623	21ur-3951	IV	15339112	15339132	1	0.974453	0.986352	0	0	0	0	0	0.708172
WBGene00045624	21ur-3736	IV	14634033	14634053	1	0.461334	0.358811	107.085	122.861	120.196	148.222	173.416	126.763
WBGene00045625	21ur-419	IV	5178803	5178823	-1	7.7372e-08	1.50957	20.6126	21.0747	19.2029	51.111	66.01	57.3619
WBGene00045626	21ur-5135	IV	15723563	15723583	1	0.458331	-1.84014	2.51373	4.03559	1.42243	0.425925	0.559406	1.41634
WBGene00045627	21ur-4966	IV	17202418	17202438	-1	0.0780367	1.86015	1.00549	1.3452	2.13365	5.1111	5.59406	4.9572
WBGene00045628	21ur-3440	IV	15269715	15269735	-1	0.641167	0.28813	2387.04	2385.93	3614.4	4399.38	3208.2	2630.15
WBGene00045629	21ur-2914	IV	15172097	15172117	1	0.177539	0.476282	48.7664	45.7367	41.2506	68.5739	68.807	50.9884
WBGene00045630	21ur-2195	IV	15252554	15252574	1	#N/A	#N/A	0	0	0	0	0	0
WBGene00045631	21ur-4580	IV	14259502	14259522	1	3.90586e-05	1.74799	10.5577	13.452	4.97852	40.4628	35.2426	24.0779
WBGene00045632	21ur-2136	IV	5435663	5435683	1	0.974453	-0.937224	0	0.448399	0	0	0	0
WBGene00045633	21ur-5345	IV	14395091	14395111	-1	0.0880774	-1.11236	20.6126	18.8327	13.5131	9.37034	6.71288	8.49806
WBGene00045634	21ur-3163	IV	15711282	15711302	1	0.63345	2.30504	0.502747	0	0	0.425925	1.11881	1.41634
WBGene00045635	21ur-98	IV	13800750	13800770	-1	0.567064	1.86229	0.502747	0.448399	0	1.27777	1.11881	1.41634
WBGene00045636	21ur-629	IV	15340252	15340272	1	0.110978	-0.381086	215.176	217.922	207.675	146.518	172.857	174.21
WBGene00045637	21ur-3513	IV	14265051	14265071	1	0.618093	-0.220234	215.176	205.815	229.723	195.073	205.862	155.798
WBGene00045638	21ur-4117	IV	13676365	13676385	-1	0.931748	0.201823	23.6291	16.5907	17.7804	18.7407	21.8169	26.9105
WBGene00045639	21ur-1324	IV	14131823	14131843	1	0.936805	-0.148006	560.562	751.964	1052.6	810.535	769.743	551.666
WBGene00045640	21ur-2876	IV	15934211	15934231	-1	0.974453	-0.372561	2.01099	1.3452	0	0.851849	1.11881	0.708172
WBGene00045641	21ur-4617	IV	17237035	17237055	1	0.944583	0.484085	2.01099	2.69039	1.42243	4.25925	2.79703	1.41634
WBGene00045642	21ur-3810	IV	15314888	15314908	-1	0.446618	-0.921892	9.04944	7.62278	6.40095	2.98147	3.91584	5.66538
WBGene00045643	21ur-2772	IV	15361319	15361339	1	0.832396	0.466003	7.03845	3.58719	7.82339	10.2222	10.0693	4.24903
WBGene00045644	21ur-3853	IV	5133083	5133103	-1	1	-0.148961	0	1.79359	1.42243	0	2.23763	0.708172
WBGene00045645	21ur-1572	IV	14764438	14764458	1	0.953862	-0.25943	12.0659	12.5552	15.6468	8.51849	11.1881	14.1634
WBGene00045646	21ur-4784	IV	14220765	14220785	-1	0.802031	-0.360702	21.1154	21.0747	24.8926	11.074	18.4604	23.3697
WBGene00045647	21ur-101	IV	16002350	16002370	-1	0.974453	-0.226013	1.50824	2.24199	2.13365	1.27777	1.11881	2.83269
WBGene00045648	21ur-4235	IV	14976698	14976718	-1	0.849048	-0.418986	20.1099	30.0427	14.9356	10.6481	16.2228	22.6615
WBGene00045649	21ur-198	IV	5891934	5891954	-1	5.71325e-06	1.74639	7.03845	9.86477	7.82339	28.9629	30.2079	24.0779
WBGene00045650	21ur-2547	IV	15251949	15251969	1	0.959302	-0.24262	13.5742	9.86477	10.6683	8.09257	12.3069	8.49806
WBGene00045651	21ur-1325	IV	14233592	14233612	-1	0.657683	-0.197535	159.873	146.178	137.265	127.351	133.698	126.055
WBGene00045652	21ur-378	IV	15694953	15694973	-1	0.614096	0.397764	1464	2263.52	2874.03	2774.9	3651.25	2269.69
WBGene00045653	21ur-1257	IV	5769282	5769302	-1	0.827619	0.548913	3.51923	4.03559	7.82339	11.074	6.15347	4.24903
WBGene00045654	21ur-3621	IV	16887548	16887568	-1	0.000342307	1.87292	6.53571	4.03559	2.84487	17.4629	14.5446	18.4125
WBGene00045655	21ur-2179	IV	6042267	6042287	1	0.888487	0.168334	155.349	163.217	248.926	234.684	220.966	179.168
WBGene00045656	21ur-2373	IV	14690558	14690578	1	0.974453	-0.380836	2.51373	1.3452	0.711217	0.425925	1.11881	2.12452
WBGene00045657	21ur-4637	IV	15329175	15329195	-1	0.974453	0.278268	1.50824	4.03559	0.711217	2.12962	2.23763	3.54086
WBGene00045658	21ur-5357	IV	15105629	15105649	-1	0.284404	0.580181	40.2197	49.7722	41.2506	51.5369	90.6238	54.5292
WBGene00045659	21ur-1723	IV	14743056	14743076	1	1	0.0433898	1.50824	1.79359	2.13365	1.7037	1.11881	2.83269
WBGene00045660	21ur-5403	IV	15245329	15245349	1	0.797924	-0.948195	2.01099	3.13879	4.97852	0.851849	1.67822	2.83269
WBGene00045661	21ur-780	IV	14027179	14027199	-1	0.715711	-1.15381	5.02747	8.51957	2.84487	0.425925	1.67822	5.66538
WBGene00045662	21ur-4553	IV	14372208	14372228	1	0.161152	-0.815514	36.1978	29.1459	31.2935	14.0555	20.1386	21.2452
WBGene00045663	21ur-5087	IV	15877277	15877297	-1	0.785588	-0.400596	22.1208	20.6263	24.8926	14.0555	16.2228	21.2452
WBGene00045664	21ur-553	IV	14650590	14650610	-1	0.396817	1.56141	1.00549	0.896797	0.711217	1.7037	2.79703	3.54086
WBGene00045665	21ur-3191	IV	16682557	16682577	1	0.974453	-0.0735281	129.709	136.313	194.162	183.999	142.089	108.35
WBGene00045666	21ur-3306	IV	15099528	15099548	1	0.264529	-1.61308	5.02747	5.38078	5.68974	2.12962	2.23763	0.708172
WBGene00045667	21ur-22	IV	5523137	5523157	1	0.743874	0.682554	3.01648	2.69039	3.55609	2.55555	6.15347	6.37355
WBGene00045668	21ur-1242	IV	5615248	5615268	1	0.461334	0.476161	65.8598	76.6762	112.372	152.481	106.287	93.4787
WBGene00045669	21ur-1303	IV	16549514	16549534	1	0.355488	-0.55639	33.1813	36.7687	24.1814	22.574	17.3416	24.786
WBGene00045670	21ur-2441	IV	4960928	4960948	1	0.131602	-0.619953	50.2747	45.7367	46.2291	36.6295	26.2921	29.0351
WBGene00045671	21ur-1935	IV	15165777	15165797	1	0.33795	-0.726281	33.684	32.7331	16.358	13.6296	16.7822	20.537
WBGene00045672	21ur-2786	IV	14607188	14607208	1	0.644477	-1.00966	7.03845	4.93238	1.42243	2.98147	2.23763	1.41634
WBGene00045673	21ur-3453	IV	16089543	16089563	-1	0.307104	1.13914	7.03845	3.13879	1.42243	8.94442	6.15347	11.3308
WBGene00045674	21ur-4693	IV	16003010	16003030	1	0.00327497	2.60534	0.502747	0.896797	2.84487	7.66664	7.83169	7.78989
WBGene00045675	21ur-2281	IV	16078374	16078394	-1	#N/A	#N/A	0	0	0	0	0	0
WBGene00045676	21ur-2712	IV	16467298	16467318	-1	0.00072118	1.10055	49.7719	65.0178	86.0573	168.666	146.564	111.891
WBGene00045677	21ur-5214	IV	15314218	15314238	1	1	-0.0554742	7.5412	6.27758	2.13365	0.425925	0.559406	14.8716
WBGene00045678	21ur-1078	IV	6060482	6060502	1	0.0100478	1.10076	78.4285	91.0249	128.019	216.796	253.971	165.004
WBGene00045679	21ur-3510	IV	5763845	5763865	1	0.854927	1.34959	0.502747	0	0.711217	0.425925	1.11881	1.41634
WBGene00045680	21ur-4163	IV	15578602	15578622	1	0.53787	-0.697293	24.6346	21.5231	14.9356	6.38887	11.7475	20.537
WBGene00045681	21ur-5291	IV	15288590	15288610	1	0.90672	-0.0979169	560.562	489.651	547.637	534.109	497.312	459.604
WBGene00045682	21ur-527	IV	13908848	13908868	-1	0.498565	0.295671	144.791	144.833	178.515	232.981	181.248	157.214
WBGene00045683	21ur-5312	IV	14261634	14261654	-1	0.974453	-0.0861318	340.359	328.676	315.78	264.499	319.98	344.88
WBGene00045684	21ur-5385	IV	5498795	5498815	1	1	0.0158157	144.791	143.488	176.382	184.851	147.124	135.261
WBGene00045685	21ur-1986	IV	17017613	17017633	-1	0.595328	1.80511	1.50824	0.448399	0	2.12962	2.23763	2.83269
WBGene00045686	21ur-3553	IV	15568127	15568147	1	0.858826	-0.517353	22.1208	15.2456	19.9141	2.98147	15.6634	21.9533
WBGene00045687	21ur-1049	IV	14364039	14364059	1	0.0981556	-0.502264	157.36	156.94	122.329	90.296	101.812	118.265
WBGene00045688	21ur-4041	IV	6179746	6179766	1	0.0714983	-0.476855	110.101	109.858	101.704	83.0553	76.0793	71.5254
WBGene00045689	21ur-3409	IV	16059092	16059112	-1	1	0	0	0	0	0	0	0
WBGene00045690	21ur-5085	IV	14415831	14415851	-1	0.974453	-0.218877	12.0659	12.5552	4.97852	7.66664	11.7475	6.37355
WBGene00045691	21ur-4812	IV	15780730	15780750	1	0.624138	0.896915	2.01099	2.24199	5.68974	5.96294	6.15347	5.66538
WBGene00045692	21ur-946	IV	16559891	16559911	-1	0.959847	0.363316	6.03296	7.17438	7.82339	9.79627	7.27228	9.91441
WBGene00045693	21ur-2392	IV	16250433	16250453	-1	0.00475823	0.880989	57.3131	43.4947	35.5609	100.944	81.1139	69.4009
WBGene00045694	21ur-5223	IV	15794083	15794103	1	0.974453	0.322834	3.51923	2.69039	1.42243	1.27777	4.47525	4.24903
WBGene00045695	21ur-4519	IV	15145087	15145107	-1	0.257906	1.00625	7.03845	3.58719	10.6683	17.4629	11.7475	12.0389
WBGene00045696	21ur-2704	IV	15549833	15549853	-1	0.965082	-0.355025	5.02747	8.51957	11.3795	5.1111	3.91584	10.6226
WBGene00045697	21ur-481	IV	14559347	14559367	1	0.974453	-0.0763347	63.8488	62.7758	71.1217	80.0738	59.2971	46.0312
WBGene00045698	21ur-5244	IV	13759239	13759259	1	0.929802	-0.913554	1.00549	1.79359	2.13365	1.27777	0.559406	0.708172
WBGene00045699	21ur-5080	IV	14680109	14680129	-1	0.391117	0.476164	18.0989	22.8683	13.5131	24.7036	25.7327	26.9105
WBGene00045700	21ur-1137	IV	16186289	16186309	-1	0.881267	0.150816	170.934	177.566	169.27	215.092	195.792	162.88
WBGene00045701	21ur-1580	IV	13718581	13718601	-1	0.162757	1.04787	5.53021	4.93238	6.40095	12.3518	10.0693	12.0389
WBGene00045702	21ur-1740	IV	15904054	15904074	1	0.239381	0.495941	65.8598	82.5053	63.2983	78.3701	110.203	111.891
WBGene00045703	21ur-457	IV	13711639	13711659	1	0.1918	-0.989614	17.5961	17.0391	14.2243	5.1111	9.50991	10.6226
WBGene00045704	21ur-3053	IV	16105776	16105796	-1	#N/A	#N/A	0	0	0	0	0	0
WBGene00045705	21ur-3074	IV	14273692	14273712	-1	0.842935	0.181914	205.121	188.327	265.284	274.721	259.565	210.327
WBGene00045706	21ur-163	IV	15541886	15541906	-1	0.385307	-0.321233	350.917	330.918	416.062	368.851	247.817	259.191
WBGene00045707	21ur-1530	IV	16385416	16385436	-1	0.0131761	0.851529	20.1099	20.6263	22.0477	46.4258	34.6832	30.4514
WBGene00045708	21ur-3591	IV	5495648	5495668	1	0.772198	-0.320019	30.6675	32.7331	36.9833	25.9814	31.3268	22.6615
WBGene00045709	21ur-5427	IV	14021300	14021320	-1	0.976746	0.0350859	383.093	385.623	478.649	470.221	411.164	393.744
WBGene00045710	21ur-2758	IV	16198241	16198261	-1	0.000182486	1.30703	14.0769	18.8327	18.4916	54.0924	37.4802	33.9923
WBGene00045711	21ur-2189	IV	5179876	5179896	-1	0.806125	-0.865506	3.01648	2.24199	2.84487	0.851849	2.23763	1.41634
WBGene00045712	21ur-877	IV	15751606	15751626	1	0.187628	0.600987	41.728	60.9822	43.3842	60.0554	90.6238	72.2336
WBGene00045713	21ur-2188	IV	15362018	15362038	-1	1	-0.116619	3.01648	0.896797	2.84487	1.27777	2.79703	2.12452
WBGene00045714	21ur-895	IV	15263589	15263609	-1	0.974453	-0.099932	280.03	280.698	359.876	364.591	286.416	205.37
WBGene00045715	21ur-764	IV	16781294	16781314	-1	0.981582	-0.0763366	18.0989	23.3167	15.6468	18.7407	17.3416	18.4125
WBGene00045716	21ur-2080	IV	15710175	15710195	-1	0.974453	0.986352	0	0	0	0	0.559406	0
WBGene00045717	21ur-3347	IV	16980347	16980367	1	0.974453	0.497699	2.01099	0.448399	0.711217	0.425925	0	4.24903
WBGene00045718	21ur-1995	IV	16393125	16393145	-1	0.575692	-0.990402	7.5412	5.38078	4.97852	2.12962	2.23763	4.9572
WBGene00045719	21ur-927	IV	14244046	14244066	1	#N/A	#N/A	0	0	0	0	0	0
WBGene00045720	21ur-1318	IV	15543266	15543286	-1	0.974453	0.986357	0	0	0	0	0	0.708172
WBGene00045721	21ur-1126	IV	15151533	15151553	1	0.589047	-0.34267	87.9806	78.9182	74.6778	77.5183	60.4159	51.6966
WBGene00045722	21ur-4997	IV	15621889	15621909	1	0.978498	0.28727	1.50824	1.79359	0	0.425925	1.11881	2.83269
WBGene00045723	21ur-368	IV	14582176	14582196	1	0.176218	-1.22615	12.5687	11.6584	16.358	6.38887	4.47525	6.37355
WBGene00045724	21ur-1377	IV	14344298	14344318	1	0.974453	-0.301248	3.51923	4.48399	7.82339	3.83332	3.91584	4.9572
WBGene00045725	21ur-4839	IV	14757137	14757157	-1	0.974453	-0.910818	0	0.448399	0.711217	0.425925	0	0
WBGene00045726	21ur-4151	IV	16745635	16745655	1	2.37419e-08	1.60734	36.7005	22.8683	35.5609	101.796	103.49	81.4398
WBGene00045727	21ur-719	IV	14463088	14463108	-1	0.640317	-0.885654	12.5687	7.62278	5.68974	4.68517	4.47525	4.9572
WBGene00045728	21ur-2397	IV	5078646	5078666	1	0.416586	1.0559	1.50824	2.69039	2.84487	5.53702	3.91584	4.9572
WBGene00045729	21ur-4447	IV	14977148	14977168	1	1	0.323266	0.502747	0.448399	0	0	0.559406	0.708172
WBGene00045730	21ur-1475	IV	15142661	15142681	-1	0.467154	0.395791	401.192	479.787	748.2	862.071	736.179	541.752
WBGene00045731	21ur-2329	IV	16897143	16897163	-1	0.98946	0.0367718	66.8653	68.1566	83.9236	79.222	73.8416	70.109
WBGene00045732	21ur-4317	IV	6125885	6125905	1	0.974453	-0.318927	16.0879	13.0036	6.40095	5.53702	7.27228	16.288
WBGene00045733	21ur-4254	IV	5507693	5507713	-1	0.0194622	0.670739	68.8763	85.1957	93.1694	140.981	133.139	117.557
WBGene00045734	21ur-3918	IV	16133525	16133545	1	0.968966	0.700963	0	0.448399	1.42243	0.851849	0.559406	1.41634
WBGene00045735	21ur-3996	IV	5864841	5864861	-1	0.91924	-0.474893	4.52472	9.41637	9.24582	2.12962	8.3911	6.37355
WBGene00045736	21ur-1612	IV	13992256	13992276	1	0.361126	-0.527774	98.0356	105.374	59.7422	55.7961	56.5	71.5254
WBGene00045737	21ur-3619	IV	16063301	16063321	1	0.413757	1.04051	4.52472	1.79359	1.42243	6.81479	5.59406	3.54086
WBGene00045738	21ur-4550	IV	5828590	5828610	-1	0.974453	1.75739	0	0	0	0.425925	0.559406	0
WBGene00045739	21ur-5063	IV	13839495	13839515	-1	0.898064	0.551873	2.51373	2.69039	2.13365	3.83332	2.79703	4.24903
WBGene00045740	21ur-4575	IV	13804023	13804043	-1	0.975368	0.141514	2.51373	8.51957	7.11217	8.09257	6.71288	4.9572
WBGene00045741	21ur-157	IV	16046621	16046641	-1	0.889862	0.303329	7.5412	7.17438	6.40095	11.9259	7.83169	5.66538
WBGene00045743	21ur-5073	IV	5401360	5401380	-1	0.934429	-0.160859	63.3461	77.1246	71.8329	65.5924	59.8565	64.4437
WBGene00045744	21ur-26	IV	16604476	16604496	-1	1.42555e-07	1.62375	18.6016	17.0391	14.2243	60.4813	50.906	42.4903
WBGene00045745	21ur-805	IV	13959485	13959505	1	0.984898	0.31447	0	1.3452	0	0	0.559406	1.41634
WBGene00045746	21ur-1219	IV	15746171	15746191	1	0.358478	-0.243122	859.194	853.751	809.365	746.22	680.238	704.631
WBGene00045747	21ur-4706	IV	16613941	16613961	1	1.02247e-09	2.15416	9.04944	9.86477	4.97852	42.1665	35.802	31.1596
WBGene00045748	21ur-4832	IV	5277283	5277303	-1	2.86181e-08	1.78168	16.0879	13.9004	19.9141	66.8702	53.1436	48.1557
WBGene00045749	21ur-2613	IV	15372663	15372683	1	0.974453	-0.937224	0.502747	0	0	0	0	0
WBGene00045750	21ur-3704	IV	16597076	16597096	1	0.542358	0.29649	45.2472	46.6335	47.6515	64.3146	54.2624	51.6966
WBGene00045751	21ur-2649	IV	16838056	16838076	1	0.86076	-0.385582	2375.48	2522.24	3232.48	708.313	2431.74	3084.09
WBGene00045752	21ur-909	IV	16450631	16450651	-1	0.0451323	-1.57847	16.5906	14.7972	22.0477	6.81479	3.91584	7.08172
WBGene00045753	21ur-2356	IV	16018174	16018194	-1	0.933886	-0.356033	9.55218	6.72598	4.97852	5.53702	5.59406	5.66538
WBGene00045754	21ur-3041	IV	15780191	15780211	-1	0.974453	-0.165166	8.54669	9.86477	9.24582	11.074	5.59406	7.78989
WBGene00045755	21ur-506	IV	5078480	5078500	1	0.000439588	1.86926	6.03296	5.38078	4.97852	29.3888	19.5792	9.91441
WBGene00045756	21ur-4821	IV	14333900	14333920	-1	0.912378	-0.206256	60.8323	58.2918	51.2076	51.9628	40.8367	55.2374
WBGene00045757	21ur-4437	IV	16690917	16690937	1	0.0390793	-0.618916	206.629	145.281	214.788	142.685	114.678	109.767
WBGene00045758	21ur-133	IV	13992564	13992584	1	0.599887	-1.04494	11.5632	7.62278	4.2673	2.55555	2.79703	6.37355
WBGene00045759	21ur-5218	IV	15694253	15694273	1	0.467154	1.02422	3.51923	2.69039	2.84487	6.81479	7.83169	3.54086
WBGene00045760	21ur-4478	IV	16444230	16444250	1	1	0.0245639	0	0.448399	0	0.425925	0	0
WBGene00045761	21ur-3127	IV	6045302	6045322	1	0.776907	-2.23129	0.502747	0.896797	1.42243	0.425925	0	0
WBGene00045762	21ur-1620	IV	17055693	17055713	-1	0.974453	-0.149951	15.0824	17.0391	16.358	9.79627	16.7822	17.7043
WBGene00045763	21ur-3601	IV	15575155	15575175	-1	1	-0.030704	1982.83	2041.56	2775.88	3104.56	1950.09	1599.76
WBGene00045764	21ur-2085	IV	14364528	14364548	-1	0.974453	0.861099	0.502747	0.448399	0	0	1.11881	0.708172
WBGene00045765	21ur-4567	IV	16564731	16564751	-1	0.974453	-0.207107	26.6456	17.0391	14.9356	11.9259	19.0198	20.537
WBGene00045766	21ur-279	IV	14200071	14200091	-1	0.104683	0.700347	20.1099	24.2135	24.8926	41.7406	35.2426	34.7004
WBGene00045767	21ur-2961	IV	14581197	14581217	1	0.974453	0.986352	0	0	0	0	0	0.708172
WBGene00045768	21ur-5176	IV	13934282	13934302	-1	1	-0.0785202	6.03296	4.48399	6.40095	6.81479	3.35644	5.66538
WBGene00045769	21ur-1922	IV	13907798	13907818	1	0.974453	-0.705542	0	0.896797	0	0.425925	0	0
WBGene00045770	21ur-5265	IV	15603278	15603298	1	0.00098486	-0.602415	387.115	361.858	342.095	224.462	257.886	237.238
WBGene00045771	21ur-237	IV	5618249	5618269	-1	1	0.0570418	6.03296	3.13879	4.2673	4.68517	5.59406	3.54086
WBGene00045772	21ur-4898	IV	15480018	15480038	-1	0.873031	0.298665	17.5961	10.3132	8.5346	14.0555	10.6287	21.2452
WBGene00045773	21ur-5304	IV	14684860	14684880	-1	0.478427	-0.270983	313.714	299.082	285.909	302.406	213.693	227.323
WBGene00045774	21ur-4765	IV	15365487	15365507	1	0.741821	-0.20478	894.386	776.626	1008.51	941.293	735.619	645.145
WBGene00045775	21ur-710	IV	14367796	14367816	1	0.00972486	-1.03438	521.851	482.477	276.663	157.166	203.624	266.273
WBGene00045776	21ur-3475	IV	14587996	14588016	1	0.974453	0.812093	0	0.448399	0	0.425925	0.559406	0
WBGene00045777	21ur-3137	IV	16359723	16359743	1	0.974453	0.917861	0	0.448399	0	0.425925	0	0.708172
WBGene00045778	21ur-1912	IV	14996317	14996337	-1	0.00098486	1.11026	21.1154	20.1779	20.6253	53.6665	45.3119	33.2841
WBGene00045779	21ur-3112	IV	15405591	15405611	-1	0.827457	0.174034	67.8708	61.4306	65.432	71.9813	69.3664	78.6071
WBGene00045780	21ur-1878	IV	14636254	14636274	-1	0.353495	-0.510545	197.077	152.456	126.597	83.0553	86.1486	167.129
WBGene00045781	21ur-2913	IV	14630200	14630220	-1	0.607192	0.576176	4.02197	5.82918	9.95704	8.51849	8.3911	12.0389
WBGene00045782	21ur-4300	IV	15540450	15540470	1	0.0508401	-0.809915	44.7444	44.3915	39.8282	22.1481	21.8169	30.4514
WBGene00045783	21ur-447	IV	13950576	13950596	1	0.974453	-0.245562	4.52472	2.24199	1.42243	0.425925	3.91584	2.83269
WBGene00045784	21ur-1	IV	16687107	16687127	1	0.413757	-0.62605	18.6016	19.2811	17.0692	11.5	12.8663	11.3308
WBGene00045785	21ur-520	IV	13994174	13994194	1	1	-0.0864635	3.51923	1.79359	2.84487	1.27777	1.67822	4.9572
WBGene00045786	21ur-1018	IV	15209109	15209129	1	0.000774065	-0.759037	269.472	253.345	241.814	147.796	158.312	145.883
WBGene00045787	21ur-3818	IV	14811354	14811374	1	0.974453	-0.401296	3.01648	5.82918	2.13365	2.12962	2.23763	4.24903
WBGene00045788	21ur-3836	IV	5969707	5969727	1	0.974453	-0.18068	2.51373	7.62278	1.42243	2.12962	5.03466	3.54086
WBGene00045789	21ur-5257	IV	16391154	16391174	1	0.841135	-0.163468	1938.59	2029	2717.56	2348.55	2014.42	1602.59
WBGene00045790	21ur-4773	IV	17237868	17237888	1	2.03162e-09	2.03233	30.1648	40.3559	44.8067	221.481	148.243	98.4359
WBGene00045791	21ur-1977	IV	15866626	15866646	1	0.859775	-0.617855	9.04944	3.13879	7.82339	2.55555	5.59406	4.9572
WBGene00045792	21ur-1072	IV	14357310	14357330	-1	0.0119612	0.689618	51.7829	54.7046	54.7637	78.796	77.7575	104.809
WBGene00045793	21ur-3911	IV	13927085	13927105	1	0.472069	-0.873092	11.0604	12.1068	9.24582	4.25925	2.79703	11.3308
WBGene00045794	21ur-1550	IV	15284594	15284614	-1	0.995342	-0.242322	2.01099	2.24199	0.711217	0.425925	1.11881	2.83269
WBGene00045795	21ur-289	IV	16442356	16442376	-1	0.974453	-0.937224	0	0	0.711217	0	0	0
WBGene00045796	21ur-3106	IV	16812997	16813017	1	0.251904	0.526829	100.549	122.413	132.998	181.444	188.52	141.634
WBGene00045797	21ur-2624	IV	17183863	17183883	1	1	-0.0800467	2.51373	0.448399	2.13365	2.12962	1.11881	1.41634
WBGene00045798	21ur-5413	IV	14000578	14000598	-1	0.0231417	1.63294	4.52472	8.51957	7.82339	14.4814	29.0891	21.2452
WBGene00045799	21ur-2826	IV	14907156	14907176	1	0.830026	-0.237476	102.56	82.9537	63.2983	53.2406	79.4357	80.0234
WBGene00045800	21ur-986	IV	17025982	17026002	-1	0.661219	-1.11482	6.03296	4.93238	7.11217	1.7037	0.559406	6.37355
WBGene00045801	21ur-1539	IV	5708524	5708544	1	0.979648	0.324536	1.50824	0.448399	0.711217	1.27777	0	2.12452
WBGene00045802	21ur-1687	IV	15175888	15175908	1	0.74861	0.210127	674.686	719.231	946.63	1078.02	867.639	758.452
WBGene00045803	21ur-1769	IV	16877127	16877147	1	0.0177696	0.806799	23.1263	21.0747	22.0477	33.648	35.2426	48.1557
WBGene00045804	21ur-1354	IV	14983710	14983730	1	0.749156	-0.639769	10.5577	11.21	7.82339	2.98147	6.71288	9.91441
WBGene00045805	21ur-3767	IV	5496271	5496291	1	0.000794791	0.854454	225.733	255.587	303.69	586.498	468.223	360.46
WBGene00045806	21ur-1413	IV	15386654	15386674	-1	8.05547e-12	1.29564	141.775	119.722	162.869	395.684	322.778	317.261
WBGene00045807	21ur-2250	IV	15306027	15306047	-1	1	-0.0139978	34.1868	30.0427	36.9833	33.2221	31.8862	34.7004
WBGene00045808	21ur-1627	IV	16747523	16747543	-1	0.78688	-2.96866	1.00549	1.3452	0	0	0	0
WBGene00045809	21ur-630	IV	13808747	13808767	1	1	0	0	0	0	0	0	0
WBGene00045810	21ur-3054	IV	16045647	16045667	1	0.875137	-0.568705	8.04395	5.82918	8.5346	3.83332	1.67822	9.91441
WBGene00045811	21ur-1502	IV	13993009	13993029	1	0.974453	-0.0738274	35.1923	43.9431	41.2506	30.2406	43.6337	41.074
WBGene00045812	21ur-3808	IV	5202386	5202406	1	0.916881	0.402141	4.52472	7.62278	3.55609	6.81479	7.27228	7.08172
WBGene00045813	21ur-3942	IV	14503606	14503626	1	0.425924	-0.271364	990.411	920.562	1178.49	896.997	797.154	863.97
WBGene00045814	21ur-5079	IV	14941256	14941276	1	1	0.146681	1.00549	0.448399	0	0.425925	0.559406	0.708172
WBGene00045815	21ur-1284	IV	15141300	15141320	1	1	0.0245155	3.01648	3.13879	10.6683	7.24072	5.03466	4.24903
WBGene00045816	21ur-73	IV	15234326	15234346	1	0.312328	-0.246962	790.82	821.915	738.954	726.627	601.921	652.935
WBGene00045817	21ur-4793	IV	14407708	14407728	1	0.974453	0.241062	7.5412	5.82918	5.68974	4.68517	7.83169	10.6226
WBGene00045818	21ur-3584	IV	16871160	16871180	1	0.570878	-0.357354	160.376	144.833	128.019	140.981	132.02	63.7355
WBGene00045819	21ur-5261	IV	14022038	14022058	-1	1	0.13489	1.00549	2.24199	0.711217	1.27777	1.11881	2.12452
WBGene00045820	21ur-2113	IV	6499007	6499027	1	0.974453	-0.937224	0	0.448399	0	0	0	0
WBGene00045821	21ur-3060	IV	16612305	16612325	1	1	0.0471395	2.01099	4.48399	0.711217	2.12962	2.79703	2.83269
WBGene00045822	21ur-4192	IV	15679047	15679067	1	0.0701676	-0.758355	50.7774	43.9431	36.9833	25.5555	29.0891	23.3697
WBGene00045823	21ur-1895	IV	16092737	16092757	-1	0.0908016	0.623067	50.7774	33.1815	41.2506	67.722	61.5347	63.0273
WBGene00045824	21ur-4351	IV	5155018	5155038	1	0.000360289	1.97723	4.52472	3.58719	2.13365	14.4814	12.3069	14.8716
WBGene00045825	21ur-2587	IV	15615471	15615491	-1	0.478713	-0.895551	12.5687	6.27758	7.82339	3.83332	5.03466	5.66538
WBGene00045826	21ur-1680	IV	15239060	15239080	-1	0.00783856	-0.720692	244.838	223.303	199.852	112.444	119.713	175.627
WBGene00045827	21ur-1481	IV	16025398	16025418	-1	1	0.0948046	3.51923	2.69039	2.13365	3.83332	2.23763	2.83269
WBGene00045828	21ur-5116	IV	4942171	4942191	1	0.871288	-0.508735	8.04395	7.62278	5.68974	5.53702	3.91584	5.66538
WBGene00045829	21ur-2034	IV	13988371	13988391	1	0.109167	0.753682	26.1428	35.8719	41.2506	45.5739	75.5199	52.4047
WBGene00045830	21ur-4950	IV	15727463	15727483	-1	0.974453	0.390915	1.50824	2.24199	0.711217	0.851849	1.67822	3.54086
WBGene00045831	21ur-646	IV	16709731	16709751	-1	0.974453	-0.927584	0	0.448399	0.711217	0	0.559406	0
WBGene00045832	21ur-1037	IV	15102993	15103013	1	0.974453	-0.937224	0	0.448399	0	0	0	0
WBGene00045833	21ur-4327	IV	5775789	5775809	1	0.0838954	0.842393	21.6181	14.7972	35.5609	55.3702	40.2773	29.7432
WBGene00045834	21ur-552	IV	15177672	15177692	1	0.974453	0.0949648	5091.31	5796	8848.96	9690.21	6588.69	4797.16
WBGene00045835	21ur-1249	IV	14163249	14163269	-1	0.607192	-0.30044	127.698	129.139	137.265	134.592	82.2327	101.977
WBGene00045836	21ur-678	IV	15142846	15142866	-1	0.798932	1.15762	1.50824	0.896797	0	1.27777	1.67822	2.83269
WBGene00045837	21ur-155	IV	13733362	13733382	-1	1	-0.327525	0.502747	1.3452	0.711217	0	0	2.12452
WBGene00045838	21ur-2719	IV	14491047	14491067	-1	1	0.019268	842.1	806.221	908.935	955.349	872.115	761.285
WBGene00045839	21ur-4954	IV	14608420	14608440	1	0.00150693	-1.68265	44.7444	54.7046	27.0262	8.51849	13.4258	18.4125
WBGene00045840	21ur-2725	IV	15980159	15980179	-1	0.974453	-0.0685488	332.818	380.242	450.2	460.424	365.292	280.436
WBGene00045841	21ur-436	IV	14047277	14047297	1	0.897736	-0.147293	125.687	112.1	120.196	84.759	105.728	134.553
WBGene00045842	21ur-1438	IV	14441512	14441532	-1	0.974453	0.314	1.50824	1.79359	1.42243	1.27777	0.559406	4.24903
WBGene00045843	21ur-4160	IV	15808770	15808790	-1	0.708171	2.10494	0	0	0.711217	0	0.559406	2.12452
WBGene00045844	21ur-1456	IV	15284598	15284618	-1	0.995342	-0.242322	2.01099	2.24199	0.711217	0.425925	1.11881	2.83269
WBGene00045845	21ur-1701	IV	16888723	16888743	1	0.892238	0.586523	3.51923	4.48399	4.97852	2.55555	7.27228	9.91441
WBGene00045846	21ur-4985	IV	15918894	15918914	1	0.0225749	0.723988	90.4944	111.651	149.356	225.74	177.332	174.21
WBGene00045847	21ur-4756	IV	5434770	5434790	1	0.732739	-0.953212	6.03296	5.82918	0.711217	1.7037	2.23763	2.83269
WBGene00045848	21ur-2018	IV	16373842	16373862	-1	#N/A	#N/A	0	0	0	0	0	0
WBGene00045849	21ur-5274	IV	15995085	15995105	-1	0.996795	-0.172112	1.00549	2.24199	1.42243	1.7037	1.67822	0.708172
WBGene00045850	21ur-2286	IV	15124189	15124209	1	0.974453	-0.0635288	106.582	81.1601	112.372	110.314	88.3862	86.397
WBGene00045851	21ur-3316	IV	14543422	14543442	-1	0.57535	-1.88552	2.01099	1.3452	2.84487	0.425925	0.559406	0.708172
WBGene00045852	21ur-4338	IV	14830863	14830883	1	0.974453	0.0845246	81.9477	101.786	120.196	95.833	124.188	101.269
WBGene00045853	21ur-1220	IV	13901804	13901824	-1	#N/A	#N/A	0	0	0	0	0	0
WBGene00045854	21ur-2975	IV	15481315	15481335	-1	0.658178	1.24822	0	1.79359	0.711217	1.7037	1.11881	3.54086
WBGene00045855	21ur-4682	IV	5896152	5896172	1	1	-0.0127546	149.818	136.762	154.334	173.777	134.258	126.763
WBGene00045856	21ur-3638	IV	5620016	5620036	-1	1	-0.169577	0	0.448399	0.711217	0.425925	0.559406	0
WBGene00045857	21ur-2386	IV	16259696	16259716	1	0.697107	-1.48813	4.02197	2.69039	0.711217	0.851849	1.11881	0.708172
WBGene00045858	21ur-5146	IV	5750724	5750744	1	0.974453	-0.408351	1.00549	0.896797	1.42243	1.27777	1.11881	0
WBGene00045859	21ur-5253	IV	5587619	5587639	-1	0.916881	-0.694359	1.00549	3.58719	3.55609	1.27777	1.67822	2.12452
WBGene00045860	21ur-31	IV	15760144	15760164	1	0.773921	-0.19684	232.269	197.744	182.072	146.944	196.911	191.915
WBGene00045861	21ur-1147	IV	15741446	15741466	1	7.85419e-06	1.21044	62.8433	72.1922	75.389	208.703	148.802	126.763
WBGene00045862	21ur-5013	IV	14305056	14305076	-1	0.974453	0.0568489	1329.26	1379.72	1353.45	1404.27	1342.58	1479.37
WBGene00045863	21ur-1894	IV	13701043	13701063	-1	1	0.00241103	4.52472	4.93238	6.40095	2.98147	6.71288	6.37355
WBGene00045864	21ur-5172	IV	16148752	16148772	-1	0.680807	-0.618407	17.5961	10.7616	9.95704	4.25925	6.71288	14.8716
WBGene00045865	21ur-768	IV	15494935	15494955	-1	0.995383	0.113065	2.51373	4.03559	4.97852	4.68517	3.35644	4.24903
WBGene00045866	21ur-3690	IV	14624220	14624240	1	0.781993	0.288432	29.1593	23.7651	28.4487	45.9999	22.9357	29.0351
WBGene00045867	21ur-880	IV	15578259	15578279	-1	0.996795	0.328534	2.01099	0	0	1.27777	0.559406	0.708172
WBGene00045868	21ur-2141	IV	16609214	16609234	-1	0.325958	0.402382	336.84	329.125	324.315	471.073	444.169	393.035
WBGene00045869	21ur-178	IV	5835163	5835183	1	0.554687	-0.460682	21.6181	25.5587	19.2029	17.8888	16.7822	13.4553
WBGene00045870	21ur-2728	IV	15569324	15569344	-1	0.974453	0.0937881	314.719	397.281	447.355	464.684	452.56	317.969
WBGene00045871	21ur-4340	IV	14050618	14050638	1	0.915952	-0.340598	8.04395	17.4875	14.9356	11.074	12.8663	7.78989
WBGene00045872	21ur-906	IV	5869971	5869991	-1	0.685898	-1.27967	4.52472	4.93238	2.84487	1.7037	0	3.54086
WBGene00045873	21ur-2345	IV	14280553	14280573	1	0.00175435	1.11477	21.1154	24.2135	29.1599	63.4628	59.8565	35.4086
WBGene00045874	21ur-754	IV	15674302	15674322	-1	0.528067	-0.571579	36.7005	33.1815	21.3365	11.5	20.1386	31.1596
WBGene00045875	21ur-58	IV	15168947	15168967	-1	0.959526	0.10966	146.299	140.797	218.344	187.833	168.941	186.249
WBGene00045876	21ur-4409	IV	5137121	5137141	1	0.516792	-0.464096	31.673	33.6299	42.673	22.9999	22.9357	32.5759
WBGene00045877	21ur-2707	IV	6161620	6161640	-1	0.00515481	1.02204	13.0714	17.9359	12.0907	28.9629	30.2079	29.7432
WBGene00045878	21ur-4669	IV	15150721	15150741	1	0.232013	-0.861785	20.1099	13.9004	14.2243	7.24072	7.83169	12.0389
WBGene00045879	21ur-4724	IV	15781118	15781138	1	0.702039	0.202937	75.9147	87.8861	74.6778	98.3886	95.0991	80.7316
WBGene00045880	21ur-3842	IV	15588820	15588840	1	0.95644	-0.112307	147.807	111.651	160.735	141.833	128.663	116.14
WBGene00045881	21ur-3422	IV	16551260	16551280	1	0.986054	-0.141791	3.01648	2.69039	3.55609	2.12962	2.79703	3.54086
WBGene00045882	21ur-4299	IV	6069709	6069729	1	#N/A	#N/A	0	0	0	0	0	0
WBGene00045883	21ur-752	IV	15546991	15547011	1	#N/A	#N/A	0	0	0	0	0	0
WBGene00045884	21ur-250	IV	13929246	13929266	1	0.839117	-0.519884	6.03296	5.82918	5.68974	3.4074	2.79703	6.37355
WBGene00045885	21ur-1674	IV	13675869	13675889	1	0.974453	-0.204791	9.55218	4.48399	8.5346	3.83332	10.0693	5.66538
WBGene00045886	21ur-48	IV	5823697	5823717	-1	0.974453	-0.153497	28.1538	23.7651	16.358	25.9814	19.0198	16.288
WBGene00045887	21ur-5194	IV	16149479	16149499	1	0.0410403	0.976113	19.1044	19.7295	15.6468	25.1296	29.6485	54.5292
WBGene00045888	21ur-3779	IV	16884670	16884690	1	0.938603	-0.1098	304.162	271.281	311.513	328.814	247.258	243.611
WBGene00045889	21ur-4711	IV	16608547	16608567	1	2.68626e-20	1.77333	73.9037	64.5694	69.6993	277.703	224.322	206.786
WBGene00045890	21ur-5113	IV	14578763	14578783	1	0.0754392	0.73015	20.1099	26.0071	29.1599	52.8146	41.3961	28.3269
WBGene00045891	21ur-4772	IV	14714760	14714780	-1	0.0306462	-0.470511	962.76	1016.97	981.479	636.757	735.619	766.242
WBGene00045892	21ur-1005	IV	14749919	14749939	1	0.330286	-0.545594	108.593	78.9182	59.031	38.3332	58.7377	73.6499
WBGene00045893	21ur-1904	IV	14915534	14915554	1	0.621242	-0.691325	24.6346	27.8007	12.0907	5.96294	18.4604	16.288
WBGene00045894	21ur-3545	IV	16906664	16906684	-1	0.311534	-0.59081	34.6895	39.9075	27.7375	17.037	25.1733	26.9105
WBGene00045895	21ur-3246	IV	16138905	16138925	-1	0.0317606	0.600753	214.673	204.918	270.262	386.74	344.035	312.304
WBGene00045896	21ur-2957	IV	14031169	14031189	-1	2.24627e-08	1.47932	97.0301	100.89	140.11	408.888	284.178	243.611
WBGene00045897	21ur-3781	IV	13760220	13760240	1	0.958657	-0.55428	3.51923	6.27758	2.84487	0.851849	1.11881	7.08172
WBGene00045898	21ur-1647	IV	14285016	14285036	-1	0.0104916	1.28566	6.03296	5.82918	11.3795	20.8703	19.0198	14.1634
WBGene00045899	21ur-3253	IV	14942540	14942560	1	0.233947	-3.74077	1.50824	1.79359	0.711217	0	0	0
WBGene00045900	21ur-3297	IV	5420409	5420429	1	0.915234	-0.147256	115.632	95.0605	123.041	127.351	86.708	84.9806
WBGene00045901	21ur-3291	IV	14949074	14949094	1	0.00893662	-0.832394	156.354	130.484	113.084	64.7405	72.7228	88.5215
WBGene00045902	21ur-793	IV	14535261	14535281	-1	0.00292089	2.57958	2.01099	1.79359	1.42243	11.5	9.50991	10.6226
WBGene00045903	21ur-1351	IV	5574738	5574758	1	0.974453	0.986352	0	0	0	0	0.559406	0
WBGene00045904	21ur-4662	IV	14202055	14202075	1	0.896542	0.226962	19.1044	23.3167	19.2029	19.5925	25.1733	28.3269
WBGene00045905	21ur-5412	IV	15281087	15281107	-1	0.645911	1.36868	0.502747	0.448399	1.42243	0.851849	2.23763	2.83269
WBGene00045906	21ur-3674	IV	14672518	14672538	-1	1	-0.00509751	30.6675	30.0427	27.7375	28.5369	38.0396	21.2452
WBGene00045907	21ur-3257	IV	15796808	15796828	1	0.458192	-0.831319	12.0659	9.86477	8.5346	4.25925	6.15347	7.08172
WBGene00045908	21ur-2819	IV	14294285	14294305	1	0.202898	1.08418	8.04395	11.6584	7.11217	8.94442	29.0891	19.8288
WBGene00045909	21ur-1395	IV	16892478	16892498	-1	0.618093	-0.322555	61.3351	68.605	44.8067	47.2776	41.9555	51.6966
WBGene00045910	21ur-3768	IV	6023958	6023978	1	0.161696	0.818567	36.1978	43.9431	58.3198	80.0738	113	49.572
WBGene00045911	21ur-3032	IV	13751497	13751517	-1	1	-0.00386661	120.156	138.107	160.024	122.24	170.06	123.93
WBGene00045912	21ur-3577	IV	15913265	15913285	-1	0.393307	-0.355231	109.096	104.028	107.394	78.3701	92.8615	79.3153
WBGene00045913	21ur-1092	IV	13996936	13996956	-1	0.974453	-1.6973	0.502747	0.448399	0	0	0	0
WBGene00045914	21ur-3731	IV	14325236	14325256	1	0.943359	-0.436693	7.03845	6.72598	7.82339	0.425925	6.15347	9.91441
WBGene00045915	21ur-4477	IV	14288227	14288247	1	0.974453	-0.398692	2.51373	2.24199	0.711217	1.7037	1.11881	1.41634
WBGene00045916	21ur-3434	IV	16377610	16377630	1	0.617583	0.98897	2.01099	1.3452	1.42243	3.4074	4.47525	1.41634
WBGene00045917	21ur-1067	IV	13728969	13728989	1	1	0.323266	0.502747	0.448399	0	0	0.559406	0.708172
WBGene00045918	21ur-4420	IV	16544651	16544671	1	0.0189114	1.29181	12.0659	8.07118	2.84487	20.0185	22.3763	15.5798
WBGene00045919	21ur-1495	IV	16701751	16701771	1	0.978054	0.0660681	32.6785	26.0071	14.9356	29.8147	25.1733	22.6615
WBGene00045920	21ur-3670	IV	15759942	15759962	-1	0.896973	-0.68159	2.51373	8.07118	2.13365	2.12962	4.47525	1.41634
WBGene00045921	21ur-5228	IV	14197667	14197687	-1	0.910829	0.234674	18.6016	13.452	19.9141	22.574	21.2574	16.288
WBGene00045922	21ur-4214	IV	14745294	14745314	1	0.69089	-0.85966	7.5412	8.96797	2.13365	3.83332	5.03466	1.41634
WBGene00045923	21ur-3896	IV	14591674	14591694	1	0.568266	1.51352	1.00549	0.896797	0	0.851849	1.11881	4.24903
WBGene00045924	21ur-1345	IV	14472419	14472439	-1	0.00176525	1.05565	27.1483	27.3523	31.2935	68.9998	65.4506	41.7822
WBGene00045925	21ur-1172	IV	15217207	15217227	1	1	-0.0123617	20.6126	19.2811	27.0262	22.1481	15.104	29.0351
WBGene00045926	21ur-274	IV	16580157	16580177	1	1	0.034535	23.6291	25.1103	32.0048	36.2036	24.6139	20.537
WBGene00045927	21ur-2239	IV	5590895	5590915	-1	0.974453	-0.232284	7.5412	4.93238	2.13365	3.4074	4.47525	4.9572
WBGene00045928	21ur-5209	IV	6134941	6134961	-1	0.0432706	-1.08207	27.6511	22.4199	23.4702	11.5	10.6287	12.7471
WBGene00045929	21ur-257	IV	15666938	15666958	1	0.00469397	-0.658513	624.411	554.669	471.537	307.943	340.679	399.409
WBGene00045930	21ur-844	IV	14355701	14355721	-1	0.000196979	1.13833	26.6456	39.9075	51.2076	94.5553	79.4357	82.148
WBGene00045931	21ur-4427	IV	13683982	13684002	1	0.808159	-1.6903	1.00549	2.69039	0	0	0.559406	0.708172
WBGene00045932	21ur-1418	IV	16206721	16206741	1	1	0.0282804	23.6291	19.2811	27.0262	19.5925	23.4951	28.3269
WBGene00045933	21ur-1134	IV	13841963	13841983	-1	0.85359	0.289192	30.1648	21.5231	11.3795	26.4073	19.5792	32.5759
WBGene00045934	21ur-500	IV	13698875	13698895	1	0.885909	0.248297	17.0934	18.3843	24.1814	29.8147	17.901	21.9533
WBGene00045935	21ur-398	IV	5815295	5815315	-1	0.976576	0.210861	1.00549	2.24199	1.42243	1.27777	2.79703	1.41634
WBGene00045936	21ur-5171	IV	13798783	13798803	-1	0.85402	0.499539	3.51923	7.17438	7.82339	6.81479	13.4258	5.66538
WBGene00045937	21ur-1628	IV	16213789	16213809	1	1	0.02931	1.00549	2.24199	2.84487	1.27777	2.79703	2.12452
WBGene00045938	21ur-4316	IV	16394278	16394298	1	0.976746	-0.462851	1.00549	1.3452	0.711217	0	2.23763	0
WBGene00045939	21ur-488	IV	14946653	14946673	-1	0.131104	0.812257	11.5632	13.0036	12.8019	21.2962	18.4604	26.2024
WBGene00045940	21ur-529	IV	13828314	13828334	1	0.959526	0.629224	0.502747	1.3452	0.711217	0.425925	1.67822	2.12452
WBGene00045941	21ur-4541	IV	14641217	14641237	-1	0.974453	0.935667	0.502747	0	0	0	1.11881	0
WBGene00045942	21ur-188	IV	16453973	16453993	1	0.974453	1.17335	0.502747	0	0	0	0	1.41634
WBGene00045943	21ur-1799	IV	14123737	14123757	-1	0.423108	1.72392	2.01099	0	0.711217	2.55555	2.23763	4.24903
WBGene00045944	21ur-2825	IV	16134288	16134308	1	0.886756	-1.72865	0.502747	0.448399	0	0	0	0
WBGene00045945	21ur-2812	IV	16140011	16140031	1	0.931526	0.451097	4.52472	3.13879	0	2.98147	3.35644	4.9572
WBGene00045946	21ur-894	IV	13751756	13751776	1	0.974453	0.986352	0	0	0	0.425925	0	0
WBGene00045947	21ur-3590	IV	15725560	15725580	-1	0.947854	-0.121319	444.428	368.135	350.63	295.166	317.743	458.895
WBGene00045948	21ur-4033	IV	16835645	16835665	1	0.974453	-0.164612	378.065	432.705	332.85	75.3887	355.223	590.616
WBGene00045949	21ur-1113	IV	14870582	14870602	1	0.0104916	-0.698519	256.401	229.132	174.959	120.111	145.446	143.051
WBGene00045950	21ur-3425	IV	16381347	16381367	1	0.234702	-0.991018	42.2307	35.8719	14.9356	12.7777	16.2228	18.4125
WBGene00045951	21ur-2421	IV	13997032	13997052	-1	0.974453	1.61604	0	0	0	0.851849	0	0
WBGene00045952	21ur-2941	IV	17206616	17206636	1	0.535779	2.20674	0.502747	0	0	0.851849	1.11881	0.708172
WBGene00045953	21ur-2023	IV	14363443	14363463	-1	0.827216	-2.26633	1.00549	1.79359	0	0.425925	0	0
WBGene00045954	21ur-2048	IV	6505803	6505823	1	1	0.0683532	4.02197	3.13879	6.40095	2.12962	3.91584	8.49806
WBGene00045955	21ur-5198	IV	14599144	14599164	1	0.0510867	1.35993	5.53021	4.03559	3.55609	13.6296	9.50991	10.6226
WBGene00045956	21ur-5048	IV	16041903	16041923	-1	0.000216835	1.76083	4.02197	7.17438	8.5346	25.9814	20.698	18.4125
WBGene00045957	21ur-938	IV	16225244	16225264	1	0.300192	1.1849	3.01648	2.24199	1.42243	5.96294	3.91584	5.66538
WBGene00045958	21ur-4106	IV	5732525	5732545	-1	0.974453	-0.0780089	35.695	30.0427	19.9141	28.9629	28.5297	24.0779
WBGene00045959	21ur-4442	IV	16875497	16875517	-1	1	0.187613	0.502747	1.3452	0	0.425925	1.11881	0.708172
WBGene00045960	21ur-4804	IV	5132389	5132409	-1	0.844426	-0.399834	11.0604	10.7616	9.24582	8.51849	7.27228	7.78989
WBGene00045961	21ur-164	IV	13623659	13623679	1	0.520878	0.656557	6.03296	5.38078	6.40095	7.24072	12.3069	8.49806
WBGene00045962	21ur-4126	IV	16164711	16164731	-1	0.00591583	1.73587	4.02197	2.69039	5.68974	11.9259	17.901	9.91441
WBGene00045963	21ur-3197	IV	5519881	5519901	-1	0.569497	-0.420859	127.195	123.758	133.709	135.018	99.5743	50.9884
WBGene00045964	21ur-2594	IV	14645094	14645114	1	0.819287	0.196272	433.368	470.819	635.828	722.368	600.802	437.65
WBGene00045965	21ur-4125	IV	15615868	15615888	-1	0.355708	0.468273	55.8049	47.5303	58.3198	70.7035	76.0793	76.4826
WBGene00045966	21ur-1954	IV	16447945	16447965	-1	0.974453	-0.0947228	120.156	108.961	147.933	149.5	93.9803	107.642
WBGene00045967	21ur-4061	IV	14473792	14473812	-1	0.355708	-0.724455	28.1538	20.6263	20.6253	15.7592	10.0693	16.288
WBGene00045968	21ur-1524	IV	14455854	14455874	1	1.22931e-05	1.77492	7.5412	7.62278	7.82339	29.3888	24.6139	24.0779
WBGene00045969	21ur-1125	IV	15550004	15550024	1	1	-0.0354795	2.51373	1.3452	3.55609	2.55555	1.67822	2.83269
WBGene00045970	21ur-1664	IV	15678947	15678967	1	0.974453	0.986352	0	0	0	0.425925	0	0
WBGene00045971	21ur-3384	IV	16587756	16587776	-1	0.974453	-0.080577	92.5054	85.6441	74.6778	72.8331	66.01	101.977
WBGene00045972	21ur-514	IV	17129797	17129817	-1	0.00587063	-1.05139	54.2966	56.9466	45.5179	22.9999	22.3763	31.1596
WBGene00045973	21ur-2657	IV	16885810	16885830	-1	0.166465	0.515276	31.1703	36.7687	40.5394	53.2406	49.2278	51.6966
WBGene00045974	21ur-804	IV	17074350	17074370	-1	0.827457	1.02555	1.00549	0.896797	0.711217	1.7037	2.23763	1.41634
WBGene00045975	21ur-2206	IV	14952960	14952980	1	0.959526	0.601758	3.01648	1.79359	0	0.851849	3.35644	3.54086
WBGene00045976	21ur-4551	IV	16676344	16676364	-1	0.974453	-0.32594	1.50824	1.79359	1.42243	1.7037	0	2.12452
WBGene00045977	21ur-2859	IV	14560450	14560470	1	0.653227	-1.92432	1.50824	4.93238	0	0.425925	0	1.41634
WBGene00045978	21ur-463	IV	16616792	16616812	1	0.177318	0.96557	8.04395	4.93238	8.5346	15.7592	14.5446	10.6226
WBGene00045979	21ur-544	IV	14145020	14145040	1	0.555794	-0.329076	64.8543	56.9466	68.988	55.3702	51.4654	43.9067
WBGene00045980	21ur-2129	IV	14967125	14967145	1	0.740472	0.193836	149.818	122.861	143.666	180.592	152.718	140.926
WBGene00045981	21ur-992	IV	15389246	15389266	1	0.0808596	-0.438706	280.03	242.135	249.637	216.796	196.911	153.673
WBGene00045982	21ur-1199	IV	15813213	15813233	-1	0.01265	1.45096	6.03296	5.82918	3.55609	13.2037	18.4604	11.3308
WBGene00045983	21ur-3771	IV	5492203	5492223	1	0.974453	-0.374551	1.00549	0.896797	1.42243	1.7037	0.559406	0
WBGene00045984	21ur-4067	IV	16831314	16831334	-1	0.995897	-0.0686591	13.5742	12.5552	12.8019	11.074	13.4258	12.7471
WBGene00045985	21ur-1790	IV	15723786	15723806	1	0.91297	0.39617	5.53021	7.62278	7.82339	6.81479	12.3069	8.49806
WBGene00045986	21ur-1165	IV	6031844	6031864	-1	1	0.0498892	10.5577	4.03559	6.40095	7.66664	5.59406	8.49806
WBGene00045987	21ur-1441	IV	16181605	16181625	-1	0.974453	-0.27552	4.02197	2.69039	0.711217	2.98147	1.11881	2.12452
WBGene00045988	21ur-649	IV	14970213	14970233	-1	#N/A	#N/A	0	0	0	0	0	0
WBGene00045989	21ur-584	IV	16087411	16087431	-1	0.643314	-1.15692	2.01099	3.13879	2.13365	0.851849	1.11881	1.41634
WBGene00045990	21ur-3373	IV	14565128	14565148	1	0.896542	-0.83835	1.50824	1.79359	0.711217	0.425925	0	2.12452
WBGene00045991	21ur-533	IV	15864244	15864264	-1	0.0370317	-0.438433	267.461	219.267	246.792	178.462	171.178	191.915
WBGene00045992	21ur-2309	IV	5901148	5901168	1	0.910829	0.148821	602.29	789.182	911.069	833.96	1010.29	706.756
WBGene00045993	21ur-1433	IV	13838459	13838479	1	0.075113	-0.470541	264.947	239.445	284.487	222.333	173.416	171.378
WBGene00045994	21ur-5323	IV	14166907	14166927	-1	1	-0.0292634	1314.18	1724.54	2230.38	1781.64	2038.48	1341.28
WBGene00045995	21ur-13	IV	13918820	13918840	-1	0.974453	0.351802	1.50824	1.3452	2.84487	2.12962	2.79703	2.12452
WBGene00045996	21ur-2495	IV	16804564	16804584	-1	1	0.0883082	6.03296	2.69039	3.55609	4.25925	3.91584	4.9572
WBGene00045997	21ur-3903	IV	14983713	14983733	1	0.749156	-0.639769	10.5577	11.21	7.82339	2.98147	6.71288	9.91441
WBGene00045998	21ur-700	IV	16640675	16640695	1	0.000562512	1.05825	17.5961	18.8327	23.4702	43.0184	44.1931	35.4086
WBGene00045999	21ur-4243	IV	15890737	15890757	-1	1	0.011131	1.50824	0.448399	0	0.851849	1.11881	0
WBGene00046000	21ur-4161	IV	5619195	5619215	-1	0.613505	0.798435	3.01648	3.58719	6.40095	10.6481	6.71288	4.24903
WBGene00046001	21ur-2801	IV	15878745	15878765	-1	#N/A	#N/A	0	0	0	0	0	0
WBGene00046002	21ur-3048	IV	4902395	4902415	1	#N/A	#N/A	0	0	0	0	0	0
WBGene00046003	21ur-2997	IV	16627585	16627605	1	0.478713	-0.41929	70.3845	82.0569	65.432	37.9073	52.5842	74.3581
WBGene00046004	21ur-1621	IV	16719280	16719300	1	7.6011e-06	1.43507	94.5164	134.968	183.494	494.924	373.683	242.903
WBGene00046005	21ur-3478	IV	16039005	16039025	-1	0.975198	-0.0927002	20.6126	11.21	17.0692	14.4814	15.6634	15.5798
WBGene00046006	21ur-2362	IV	16107254	16107274	1	0.974453	-0.418027	0.502747	1.3452	0.711217	0	0	2.12452
WBGene00046007	21ur-4055	IV	15209919	15209939	1	0.239381	-0.519647	83.9587	58.7402	68.988	45.148	43.0743	60.1946
WBGene00046008	21ur-3360	IV	14362672	14362692	-1	0.00311681	-0.4594	1101.52	936.705	1098.12	787.96	723.313	768.367
WBGene00046009	21ur-2849	IV	14164864	14164884	1	0.192567	-0.563139	61.8378	66.8114	62.5871	39.611	40.2773	50.2802
WBGene00046010	21ur-2648	IV	15749455	15749475	1	0.482961	-0.573043	50.2747	56.4982	31.2935	30.2406	28.5297	34.7004
WBGene00046011	21ur-5342	IV	14624634	14624654	1	1	0.025034	65.3571	79.3666	70.4105	79.222	82.7922	55.9456
WBGene00046012	21ur-2424	IV	14639380	14639400	-1	3.47846e-13	1.49554	57.3131	61.4306	55.4749	179.74	153.277	158.631
WBGene00046013	21ur-5021	IV	15144586	15144606	-1	0.234702	-0.396703	138.758	118.377	110.95	91.5738	85.0298	104.101
WBGene00046014	21ur-2448	IV	5176268	5176288	-1	0.974453	0.986352	0	0	0	0	0.559406	0
WBGene00046015	21ur-963	IV	15896622	15896642	1	0.0110923	2.00121	2.51373	3.13879	3.55609	13.6296	13.4258	9.20624
WBGene00046016	21ur-2994	IV	15406156	15406176	1	0.377634	-0.46561	71.8928	70.847	73.9666	44.7221	39.1584	74.3581
WBGene00046017	21ur-50	IV	14877377	14877397	-1	1	0.0706816	4.52472	12.5552	13.5131	2.98147	14.5446	14.8716
WBGene00046018	21ur-4221	IV	16625142	16625162	-1	0.889862	0.512023	2.51373	7.17438	5.68974	4.68517	12.3069	4.9572
WBGene00046019	21ur-1857	IV	15179302	15179322	-1	0.974453	0.995588	0	0.448399	0.711217	0.851849	0	1.41634
WBGene00046020	21ur-3185	IV	15562010	15562030	-1	0.881642	0.54528	2.51373	1.3452	3.55609	3.4074	2.23763	4.9572
WBGene00046021	21ur-76	IV	14971569	14971589	1	0.863668	-0.158393	910.474	773.936	1140.08	1034.14	786.525	706.756
WBGene00046022	21ur-2945	IV	15920579	15920599	1	1	0	0	0	0	0	0	0
WBGene00046023	21ur-292	IV	15421159	15421179	1	0.398274	-0.68773	37.2032	37.2171	25.6038	11.5	24.0545	27.6187
WBGene00046024	21ur-2625	IV	15396919	15396939	-1	0.834789	1.49169	1.00549	0	0.711217	0	3.35644	1.41634
WBGene00046025	21ur-5231	IV	14268472	14268492	-1	0.974004	0.174259	23.1263	23.7651	24.1814	26.4073	30.2079	23.3697
WBGene00046026	21ur-2556	IV	14366794	14366814	1	0.0135018	1.24604	7.03845	8.51957	6.40095	17.037	12.8663	23.3697
WBGene00046027	21ur-2007	IV	14878244	14878264	1	0.154817	-1.21834	17.5961	12.1068	12.0907	4.25925	9.50991	4.24903
WBGene00046028	21ur-1881	IV	16479682	16479702	1	1	0.0568413	1.00549	2.24199	1.42243	1.27777	2.23763	1.41634
WBGene00046029	21ur-505	IV	16042244	16042264	-1	0.219766	-0.446448	289.582	238.996	233.99	140.981	194.114	226.615
WBGene00046030	21ur-3209	IV	6176712	6176732	-1	#N/A	#N/A	0	0	0	0	0	0
WBGene00046031	21ur-1747	IV	14749614	14749634	-1	0.0501931	-0.674416	68.3735	75.331	73.2554	41.7406	42.5149	52.4047
WBGene00046032	21ur-4085	IV	14999879	14999899	1	0.974453	0.0693376	278.019	255.139	300.134	324.98	292.57	254.942
WBGene00046033	21ur-4741	IV	16574038	16574058	1	#N/A	#N/A	0	0	0	0	0	0
WBGene00046034	21ur-4381	IV	17186777	17186797	-1	0.990642	-0.323238	0.502747	0.896797	0	0	0.559406	0.708172
WBGene00046035	21ur-3101	IV	5902664	5902684	1	0.74861	0.432203	9.04944	11.21	10.6683	15.3333	13.4258	12.7471
WBGene00046036	21ur-4419	IV	5197143	5197163	1	0.974453	0.697413	0.502747	0	0	0.851849	0	0
WBGene00046037	21ur-1690	IV	14602638	14602658	1	0.881257	-0.247972	51.2801	47.0819	44.8067	34.074	39.7179	47.4475
WBGene00046038	21ur-729	IV	14345619	14345639	-1	0.851705	-0.438666	12.0659	13.9004	7.82339	5.96294	8.9505	10.6226
WBGene00046039	21ur-1340	IV	17185756	17185776	-1	0.828601	1.89341	0	0	0	0	1.11881	0
WBGene00046040	21ur-1659	IV	14301372	14301392	1	0.0301762	-0.65607	205.623	162.769	138.687	96.6849	97.3367	129.595
WBGene00046041	21ur-2213	IV	15216501	15216521	-1	0.974453	0.364705	2.01099	0.896797	0.711217	0.425925	1.67822	2.83269
WBGene00046042	21ur-2163	IV	14274093	14274113	1	0.102271	-0.603769	81.9477	79.815	73.2554	43.4443	47.5495	65.1518
WBGene00046043	21ur-2794	IV	15897358	15897378	-1	0.721486	0.336943	56.3076	64.5694	43.3842	50.2591	72.7228	86.397
WBGene00046044	21ur-3565	IV	15832687	15832707	-1	0.974453	-0.280129	5.53021	5.38078	7.11217	2.98147	5.03466	7.08172
WBGene00046045	21ur-3761	IV	16687491	16687511	1	0.00231975	0.855522	237.799	262.762	341.384	583.091	520.248	416.405
WBGene00046046	21ur-1920	IV	15482966	15482986	1	1	0.0042825	135.239	120.619	122.329	131.185	121.951	126.055
WBGene00046047	21ur-2923	IV	14751839	14751859	1	0.230662	-0.682083	52.2856	57.8434	44.0955	28.5369	24.0545	44.6148
WBGene00046048	21ur-869	IV	13722850	13722870	-1	0.508426	-1.53999	2.51373	2.69039	2.84487	0.425925	1.67822	0.708172
WBGene00046049	21ur-5303	IV	16033325	16033345	1	0.641027	0.212483	382.087	366.79	458.024	474.054	433.54	489.347
WBGene00046050	21ur-1865	IV	5584089	5584109	1	0.718508	0.537514	16.5906	23.3167	11.3795	11.9259	34.6832	29.0351
WBGene00046051	21ur-631	IV	13726217	13726237	-1	0.830026	-0.162722	112.615	108.512	107.394	101.796	81.1139	111.183
WBGene00046052	21ur-825	IV	15724658	15724678	1	0.974453	-0.341643	0	3.58719	3.55609	1.27777	2.23763	2.12452
WBGene00046053	21ur-3599	IV	16357771	16357791	-1	0.270054	-1.37947	8.54669	7.17438	6.40095	2.12962	1.11881	5.66538
WBGene00046054	21ur-5208	IV	14751836	14751856	1	0.230662	-0.682083	52.2856	57.8434	44.0955	28.5369	24.0545	44.6148
WBGene00046055	21ur-1934	IV	14555659	14555679	-1	0.22585	-0.316833	261.428	237.651	225.456	203.592	176.772	201.829
WBGene00046056	21ur-3544	IV	15624379	15624399	1	0.881267	1.40635	0.502747	0	0.711217	1.7037	0.559406	0.708172
WBGene00046057	21ur-1696	IV	15989519	15989539	1	0.0297738	-0.647919	95.5218	109.409	93.8806	66.4442	66.01	58.0701
WBGene00046058	21ur-1274	IV	5425097	5425117	1	0.516792	-0.727267	19.6071	23.3167	21.3365	11.5	13.9852	13.4553
WBGene00046059	21ur-1837	IV	15986317	15986337	-1	0.974453	0.0638412	184.005	216.128	169.27	124.37	226	247.152
WBGene00046060	21ur-2661	IV	14966689	14966709	1	0.68215	-0.927296	4.52472	3.58719	4.2673	2.12962	2.23763	2.12452
WBGene00046061	21ur-919	IV	6042100	6042120	-1	0.985336	-0.682195	0	0.896797	0	0	0.559406	0
WBGene00046062	21ur-3336	IV	15102451	15102471	-1	0.46137	-0.259358	692.282	684.256	822.878	667.85	608.634	558.748
WBGene00046063	21ur-3570	IV	15978663	15978683	-1	0.179672	-0.452007	425.826	346.612	463.713	377.795	260.683	262.732
WBGene00046064	21ur-5051	IV	6494022	6494042	1	#N/A	#N/A	0	0	0	0	0	0
WBGene00046065	21ur-1383	IV	17261548	17261568	-1	0.310871	0.766351	9.55218	9.86477	7.82339	11.074	22.3763	13.4553
WBGene00046066	21ur-391	IV	14284599	14284619	1	0.830026	-0.171555	843.609	742.548	1093.85	952.367	672.966	751.371
WBGene00046067	21ur-4480	IV	16544405	16544425	1	0.545517	-0.810769	11.5632	12.1068	8.5346	3.83332	3.91584	11.3308
WBGene00046068	21ur-1845	IV	15727512	15727532	1	0.957439	-0.148953	37.706	39.4591	29.8711	33.648	34.1238	29.0351
WBGene00046069	21ur-3010	IV	15262354	15262374	-1	0.981968	-0.0679736	28.1538	31.3879	33.4272	35.3517	21.8169	31.1596
WBGene00046070	21ur-3871	IV	13761158	13761178	1	0.809639	-0.389474	24.6346	25.1103	17.0692	15.7592	10.6287	25.4942
WBGene00046071	21ur-2883	IV	16248785	16248805	-1	0.985476	0.0523206	103.566	123.758	135.842	70.2776	148.802	158.631
WBGene00046072	21ur-727	IV	14038024	14038044	1	0.819287	-1.52647	1.50824	2.69039	0	0.851849	0.559406	0
WBGene00046073	21ur-1591	IV	13719446	13719466	1	0.354207	-0.539653	119.151	110.306	80.3675	48.9813	68.2476	97.7277
WBGene00046074	21ur-1918	IV	14554517	14554537	-1	0.789712	1.68655	0	0.448399	0.711217	0.851849	0	2.83269
WBGene00046075	21ur-4616	IV	6481968	6481988	1	1	-0.00763767	23.1263	16.5907	24.8926	22.9999	21.2574	19.1206
WBGene00046076	21ur-5404	IV	16623031	16623051	1	8.92617e-10	1.63464	18.0989	22.4199	22.0477	73.685	60.4159	58.7783
WBGene00046077	21ur-5213	IV	6178898	6178918	-1	0.670097	0.205967	461.019	476.648	531.99	557.961	515.213	621.775
WBGene00046078	21ur-299	IV	5775507	5775527	1	0.815946	1.19463	1.00549	0.448399	0.711217	0.851849	3.35644	0.708172
WBGene00046079	21ur-1001	IV	14830288	14830308	1	7.41962e-08	1.31677	36.7005	43.4947	30.5823	96.6849	94.5397	87.1052
WBGene00046080	21ur-1426	IV	14156786	14156806	-1	0.365216	-0.972637	16.0879	8.96797	18.4916	5.53702	9.50991	7.08172
WBGene00046081	21ur-4624	IV	15286231	15286251	-1	0.905674	-0.226947	34.6895	24.2135	21.3365	22.1481	23.4951	23.3697
WBGene00046082	21ur-912	IV	15063352	15063372	-1	0.955281	1.82435	0	0.448399	0	0	0	2.12452
WBGene00046083	21ur-2734	IV	14435857	14435877	1	0.999078	-0.198663	1.00549	0.896797	0.711217	0.425925	0.559406	1.41634
WBGene00046084	21ur-1042	IV	5830666	5830686	-1	1	0.174211	0	0.896797	0	0.425925	0	0.708172
WBGene00046085	21ur-23	IV	16206597	16206617	-1	0.663573	2.30814	0	0	0.711217	0.851849	0	2.12452
WBGene00046086	21ur-325	IV	5213902	5213922	1	#N/A	#N/A	0	0	0	0	0	0
WBGene00046087	21ur-734	IV	16678764	16678784	1	0.751298	1.30942	1.00549	0.448399	0	1.27777	0.559406	2.12452
WBGene00046088	21ur-409	IV	15697656	15697676	1	0.512902	-0.482474	31.673	34.0783	33.4272	18.3148	22.3763	31.1596
WBGene00046089	21ur-2171	IV	15206003	15206023	-1	0.827457	-0.662993	3.01648	6.27758	4.2673	3.4074	1.67822	3.54086
WBGene00046090	21ur-5053	IV	15247743	15247763	1	1	-0.00738566	16.5906	21.0747	16.358	15.3333	18.4604	20.537
WBGene00046091	21ur-1566	IV	15253964	15253984	1	0.968966	-0.095505	289.582	300.427	394.725	336.906	317.743	264.148
WBGene00046092	21ur-41	IV	17038557	17038577	1	0.974453	0.56408	1.50824	0	0.711217	1.27777	0.559406	1.41634
WBGene00046093	21ur-2297	IV	15307844	15307864	-1	0.774871	0.449755	9.04944	12.5552	14.2243	19.1666	22.3763	6.37355
WBGene00046094	21ur-265	IV	5787504	5787524	1	0.691744	-0.376301	40.2197	36.3203	49.074	35.3517	33.005	27.6187
WBGene00046095	21ur-2391	IV	16059521	16059541	1	0.00216376	-0.497543	459.51	427.772	433.842	333.073	299.282	302.389
WBGene00046096	21ur-1686	IV	14932050	14932070	1	0.251116	-0.768221	42.7335	29.1459	22.7589	14.9074	16.7822	24.786
WBGene00046097	21ur-971	IV	5506448	5506468	1	0.974453	-0.931177	0	0.448399	0.711217	0	0.559406	0
WBGene00046098	21ur-4091	IV	13679205	13679225	-1	1	0.028153	21.1154	21.9715	21.3365	21.7222	16.7822	27.6187
WBGene00046099	21ur-2017	IV	13765183	13765203	1	0.546044	1.58273	1.50824	0.896797	0	0.851849	2.79703	4.24903
WBGene00046100	21ur-2779	IV	13863695	13863715	1	0.558942	-0.427605	41.2252	52.4626	46.2291	44.7221	30.2079	28.3269
WBGene00046101	21ur-146	IV	14584885	14584905	1	0.974453	0.193253	6.03296	5.82918	3.55609	7.66664	5.03466	4.9572
WBGene00046102	21ur-4653	IV	16108380	16108400	1	1	0.0245637	0	0.448399	0	0.425925	0	0
WBGene00046103	21ur-3464	IV	16471543	16471563	1	1	0.0190871	0	1.79359	2.84487	0.851849	1.67822	2.12452
WBGene00046104	21ur-4454	IV	5769501	5769521	1	0.699774	-1.83362	2.51373	2.24199	1.42243	0.425925	0	1.41634
WBGene00046105	21ur-191	IV	15699348	15699368	1	0.291972	-0.680935	39.2142	26.0071	23.4702	15.7592	15.6634	24.786
WBGene00046106	21ur-480	IV	16806009	16806029	-1	0.000296222	1.37785	14.5797	10.7616	14.2243	32.3703	39.7179	29.7432
WBGene00046107	21ur-400	IV	14460683	14460703	-1	0.665178	0.309728	39.717	53.3594	58.3198	68.5739	69.3664	48.1557
WBGene00046108	21ur-4846	IV	14090917	14090937	-1	0.524039	0.504485	26.1428	15.694	14.2243	23.4259	21.2574	36.1168
WBGene00046109	21ur-2935	IV	5974848	5974868	-1	0.152588	-0.469334	301.145	304.911	242.525	175.055	198.589	241.487
WBGene00046110	21ur-1289	IV	15678948	15678968	1	0.974453	0.986352	0	0	0	0.425925	0	0
WBGene00046111	21ur-4116	IV	15426410	15426430	-1	0.846623	0.831389	1.00549	4.48399	2.13365	0.851849	3.35644	9.91441
WBGene00046112	21ur-2751	IV	5907385	5907405	1	0.914808	-0.216002	21.1154	36.3203	32.0048	26.8332	28.5297	21.2452
WBGene00046113	21ur-1190	IV	14405962	14405982	-1	0.1708	0.433163	133.228	136.313	156.468	179.314	223.203	171.378
WBGene00046114	21ur-2298	IV	14224784	14224804	-1	0.711956	0.295722	48.7664	33.1815	35.5609	58.3517	41.3961	43.9067
WBGene00046115	21ur-2939	IV	15547845	15547865	1	0.974453	-0.115306	8.04395	17.9359	17.0692	13.6296	11.1881	14.8716
WBGene00046116	21ur-2746	IV	16567650	16567670	-1	0.886756	0.463157	5.53021	9.86477	4.2673	4.68517	17.901	4.9572
WBGene00046117	21ur-2479	IV	14401109	14401129	1	1	0.00684396	122.67	147.523	203.408	217.222	125.866	130.304
WBGene00046118	21ur-3327	IV	16088869	16088889	-1	0.210318	-0.708003	130.211	84.7473	100.282	71.5553	78.8763	41.7822
WBGene00046119	21ur-2409	IV	14718182	14718202	-1	0.574516	0.403197	24.1318	32.2847	52.6301	54.0924	45.3119	42.4903
WBGene00046120	21ur-3797	IV	15939725	15939745	1	0.872509	-1.832	0.502747	0.896797	0.711217	0	0.559406	0
WBGene00046121	21ur-3554	IV	16146294	16146314	1	2.73598e-08	1.56551	19.1044	24.6619	19.2029	65.1665	72.1634	49.572
WBGene00046122	21ur-4738	IV	15207231	15207251	1	0.974453	0.537624	0.502747	0.896797	0.711217	1.27777	1.67822	0
WBGene00046123	21ur-4521	IV	14047698	14047718	1	0.963216	-0.36701	10.0549	3.13879	3.55609	2.98147	3.35644	7.08172
WBGene00046124	21ur-2672	IV	16551072	16551092	1	0.364471	0.330385	159.371	167.253	190.606	244.907	212.574	190.498
WBGene00046125	21ur-1236	IV	16543188	16543208	1	0.88304	-0.71163	6.53571	2.69039	0.711217	1.7037	1.11881	3.54086
WBGene00046126	21ur-2837	IV	16537820	16537840	-1	0.934483	-0.384871	14.5797	9.41637	6.40095	4.25925	8.9505	10.6226
WBGene00046127	21ur-3884	IV	15073346	15073366	-1	0.349497	-1.54446	7.5412	8.96797	4.97852	1.27777	2.79703	3.54086
WBGene00046128	21ur-305	IV	14924270	14924290	1	0.974453	0.753235	0.502747	0	0.711217	0.851849	1.11881	0
WBGene00046129	21ur-4457	IV	14803672	14803692	-1	0.22585	2.35221	0.502747	0.448399	0.711217	0.851849	2.79703	4.9572
WBGene00046130	21ur-3376	IV	15629866	15629886	-1	0.704155	-0.554198	14.0769	10.7616	13.5131	10.6481	6.71288	8.49806
WBGene00046131	21ur-2193	IV	13873398	13873418	-1	0.478713	-0.394374	85.4669	89.2313	73.9666	54.9443	60.4159	75.0662
WBGene00046132	21ur-4375	IV	14126024	14126044	-1	0.969676	-0.0749998	1702.3	2094.47	1989.27	1775.68	2112.32	1604.01
WBGene00046133	21ur-2638	IV	13956565	13956585	-1	0.862344	0.16913	307.178	317.915	309.379	257.258	419.555	375.331
WBGene00046134	21ur-3999	IV	14899529	14899549	-1	0.974453	-0.13802	26.6456	17.9359	20.6253	17.8888	15.6634	26.2024
WBGene00046135	21ur-1264	IV	16547563	16547583	1	0.0355528	-0.871364	277.516	284.733	187.05	118.833	124.188	167.837
WBGene00046136	21ur-888	IV	16817129	16817149	1	0.876254	0.147987	379.071	356.477	519.9	475.332	439.693	473.767
WBGene00046137	21ur-1033	IV	15660597	15660617	1	1	0	0	0	0	0	0	0
WBGene00046138	21ur-2220	IV	13830698	13830718	1	0.00113281	-0.606052	2410.17	2658.11	2371.91	1555.9	1808.56	1523.99
WBGene00046139	21ur-86	IV	5787751	5787771	-1	0.953923	1.90041	0	0	0	0	1.11881	0
WBGene00046140	21ur-3206	IV	13964184	13964204	-1	0.974453	1.61604	0	0	0	0.851849	0	0
WBGene00046141	21ur-487	IV	14170702	14170722	-1	0.628094	-1.47799	3.51923	4.03559	2.13365	0	2.23763	1.41634
WBGene00046142	21ur-983	IV	16396588	16396608	1	0.374422	0.851094	9.55218	3.58719	14.9356	24.2777	15.6634	8.49806
WBGene00046143	21ur-4973	IV	5974965	5974985	-1	#N/A	#N/A	0	0	0	0	0	0
WBGene00046144	21ur-3756	IV	15841816	15841836	-1	0.590456	-0.341407	188.53	215.231	194.873	124.796	134.817	214.576
WBGene00046145	21ur-3658	IV	17173943	17173963	1	0.974453	0.473504	1.50824	3.13879	0.711217	0.851849	3.35644	3.54086
WBGene00046146	21ur-3158	IV	15997223	15997243	-1	0.516792	0.356893	908.463	921.459	1409.63	1501.81	1292.79	1351.9
WBGene00046147	21ur-3223	IV	16353004	16353024	1	0.761175	0.224005	38.7115	42.1495	54.7637	55.7961	53.1436	47.4475
WBGene00046148	21ur-2402	IV	5807934	5807954	-1	0.974453	-0.324689	1.50824	3.13879	1.42243	1.27777	2.23763	1.41634
WBGene00046149	21ur-225	IV	14981339	14981359	1	0.743874	0.148393	312.206	272.626	298.711	323.277	322.218	333.549
WBGene00046150	21ur-4885	IV	14096118	14096138	1	0.974453	0.511782	0	0.896797	0.711217	0.425925	0.559406	1.41634
WBGene00046151	21ur-2319	IV	15947649	15947669	1	1	0.0245637	0.502747	0	0	0	0.559406	0
WBGene00046152	21ur-4143	IV	14973613	14973633	-1	0.974453	-0.332312	1.50824	2.24199	2.13365	0.851849	1.11881	2.83269
WBGene00046153	21ur-4749	IV	14945727	14945747	-1	0.342691	0.607782	17.0934	12.1068	14.2243	25.5555	19.5792	20.537
WBGene00046154	21ur-4599	IV	15436626	15436646	-1	0.300559	0.502302	1062.81	1294.08	2054.71	2804.71	1949.53	1490.7
WBGene00046155	21ur-5377	IV	14972383	14972403	-1	0.98946	0.0312704	294.609	290.562	361.298	321.999	293.129	351.253
WBGene00046156	21ur-1546	IV	16452202	16452222	1	0.974453	0.986352	0	0	0	0	0.559406	0
WBGene00046157	21ur-2076	IV	5797784	5797804	1	0.974453	0.111162	30.1648	45.7367	36.2721	57.0739	34.6832	28.3269
WBGene00046158	21ur-1153	IV	16359636	16359656	1	0.974453	1.05503	0	0.448399	0	0	0.559406	0.708172
WBGene00046159	21ur-5181	IV	15243053	15243073	-1	0.974453	-0.810473	1.50824	0.896797	0.711217	0.425925	0	1.41634
WBGene00046160	21ur-1718	IV	15751727	15751747	1	0.0875406	0.748778	32.1758	49.3238	54.0525	67.2961	86.1486	73.6499
WBGene00046161	21ur-816	IV	5914403	5914423	1	0.876511	0.545861	3.01648	1.79359	2.13365	3.83332	3.35644	2.83269
WBGene00046162	21ur-1402	IV	15699453	15699473	1	0.732739	0.413253	29.662	43.0463	36.2721	27.6851	69.9258	48.1557
WBGene00046163	21ur-361	IV	15275397	15275417	1	0.387342	-0.859333	22.6236	26.0071	7.11217	9.37034	7.27228	14.8716
WBGene00046164	21ur-5001	IV	15148572	15148592	-1	0.00207582	1.14425	15.0824	13.452	14.9356	34.074	29.6485	31.8677
WBGene00046165	21ur-410	IV	16618040	16618060	1	0.974453	0.318917	1.00549	1.3452	0.711217	0.851849	1.67822	1.41634
WBGene00046166	21ur-2455	IV	16545177	16545197	1	0.363874	-0.370745	363.486	399.972	452.334	381.203	297.045	259.899
WBGene00046167	21ur-2338	IV	16640905	16640925	1	0.455662	-2.05049	4.02197	1.3452	1.42243	0.425925	0.559406	0.708172
WBGene00046168	21ur-2603	IV	14693529	14693549	-1	0.427538	-1.3608	9.04944	10.7616	2.84487	0.851849	2.79703	5.66538
WBGene00046169	21ur-4763	IV	15310569	15310589	1	0.949854	-0.301376	9.04944	10.3132	6.40095	8.94442	5.59406	6.37355
WBGene00046170	21ur-1512	IV	6187712	6187732	1	0.607192	-0.50572	26.6456	25.5587	16.358	10.6481	16.2228	22.6615
WBGene00046171	21ur-51	IV	16835240	16835260	-1	0.725816	0.326042	34.1868	35.4235	41.9618	60.0554	34.6832	43.9067
WBGene00046172	21ur-1279	IV	16887952	16887972	-1	0.974453	0.168029	8.04395	6.72598	2.84487	3.83332	6.71288	9.91441
WBGene00046173	21ur-3233	IV	15869032	15869052	1	0.660085	-0.805687	12.5687	14.7972	6.40095	6.81479	8.9505	3.54086
WBGene00046174	21ur-653	IV	14051949	14051969	-1	1	0.0262726	1.00549	0.896797	1.42243	0.851849	1.11881	1.41634
WBGene00046175	21ur-745	IV	14051794	14051814	1	0.555817	-1.46156	4.02197	3.58719	2.13365	1.7037	1.67822	0
WBGene00046176	21ur-3971	IV	14470642	14470662	1	3.97877e-06	1.41388	22.6236	24.2135	32.0048	89.8701	66.5694	49.572
WBGene00046177	21ur-2344	IV	17074903	17074923	1	0.868735	2.33074	0	0.448399	0	0.425925	1.11881	1.41634
WBGene00046178	21ur-1872	IV	14525197	14525217	-1	0.652784	-2.50128	3.51923	0.896797	1.42243	0.425925	0.559406	0
WBGene00046179	21ur-663	IV	15330774	15330794	1	0.00326112	1.88668	3.01648	3.58719	2.13365	14.0555	10.0693	8.49806
WBGene00046180	21ur-498	IV	15867721	15867741	-1	0.915682	-1.32658	0.502747	0.896797	0	0	0.559406	0
WBGene00046181	21ur-1650	IV	16700757	16700777	1	0.705704	-2.30091	2.01099	3.13879	0.711217	0	0.559406	0.708172
WBGene00046182	21ur-3294	IV	14812662	14812682	1	0.809274	-0.862997	10.5577	8.96797	0.711217	1.27777	3.91584	6.37355
WBGene00046183	21ur-4540	IV	14811017	14811037	1	0.934429	-0.648705	6.03296	6.72598	1.42243	0.425925	3.35644	5.66538
WBGene00046184	21ur-491	IV	14380555	14380575	-1	0.976746	-0.585008	1.50824	0	0	0.425925	0.559406	0
WBGene00046185	21ur-546	IV	15429297	15429317	1	0.974453	1.90067	0	0	0	0	1.11881	0
WBGene00046186	21ur-1420	IV	14306167	14306187	-1	0.190289	-0.408565	192.552	161.872	152.2	104.352	130.901	148.716
WBGene00046187	21ur-4	IV	13730709	13730729	-1	0.854927	-0.948421	4.02197	3.13879	0.711217	0.425925	1.11881	2.83269
WBGene00046188	21ur-2647	IV	17226436	17226456	-1	0.762207	0.937352	1.00549	0.896797	4.2673	5.1111	5.03466	0.708172
WBGene00046189	21ur-2354	IV	6054944	6054964	1	0.703292	-0.282109	113.621	100.89	123.041	112.444	93.9803	69.4009
WBGene00046190	21ur-3976	IV	15777728	15777748	1	0.969577	0.241316	13.0714	18.3843	6.40095	9.37034	19.5792	16.9961
WBGene00046191	21ur-3788	IV	13992301	13992321	-1	0.638782	0.354871	403.705	533.146	574.663	587.35	782.05	562.997
WBGene00046192	21ur-3682	IV	5890035	5890055	-1	1	0.0245637	0	0.448399	0	0	0	0.708172
WBGene00046193	21ur-3287	IV	16251565	16251585	1	5.6535e-10	1.87957	69.379	65.0178	82.5012	371.406	252.292	169.961
WBGene00046194	21ur-2435	IV	15724101	15724121	-1	0.118462	0.514287	51.2801	62.7758	80.3675	89.8701	97.8961	87.8133
WBGene00046195	21ur-3526	IV	15721508	15721528	-1	0.371994	1.00469	8.04395	2.69039	3.55609	8.51849	7.83169	12.7471
WBGene00046196	21ur-1266	IV	13725890	13725910	-1	1	0.0245638	0	0.448399	0	0	0	0.708172
WBGene00046197	21ur-1841	IV	5442930	5442950	-1	0.974453	0.315908	1.50824	0.448399	0.711217	0.851849	1.11881	1.41634
WBGene00046198	21ur-1812	IV	17180868	17180888	-1	0.974453	-0.415872	3.01648	1.3452	1.42243	1.27777	1.67822	1.41634
WBGene00046199	21ur-3654	IV	17049123	17049143	-1	0.810729	0.571015	3.01648	1.79359	4.97852	6.81479	4.47525	2.12452
WBGene00046200	21ur-2225	IV	16367944	16367964	-1	0.37917	1.2429	4.52472	0.448399	2.13365	2.98147	5.59406	8.49806
WBGene00046201	21ur-5313	IV	14347724	14347744	-1	0.988704	-0.180267	3.01648	1.79359	2.13365	1.27777	2.79703	2.12452
WBGene00046202	21ur-4236	IV	14564008	14564028	-1	0.76943	-0.975977	5.02747	4.03559	2.13365	2.12962	2.79703	0.708172
WBGene00046203	21ur-1177	IV	15495046	15495066	-1	0.0976995	1.49547	2.51373	3.13879	2.84487	9.37034	6.71288	7.78989
WBGene00046204	21ur-1120	IV	16208486	16208506	1	0.413757	-0.441494	72.3955	48.8754	52.6301	36.6295	41.3961	50.9884
WBGene00046205	21ur-5165	IV	17032902	17032922	-1	0.000169918	1.21775	15.0824	21.0747	19.2029	47.2776	41.9555	38.9495
WBGene00046206	21ur-2890	IV	15883990	15884010	1	0.215122	2.7041	0.502747	0.448399	0	1.7037	1.11881	4.24903
WBGene00046207	21ur-3238	IV	14995803	14995823	-1	0.000245462	1.64637	7.5412	10.7616	11.3795	34.9258	38.0396	18.4125
WBGene00046208	21ur-1304	IV	14711385	14711405	-1	0.32848	-0.485898	137.753	111.651	103.126	66.8702	79.4357	106.934
WBGene00046209	21ur-333	IV	14269555	14269575	1	0.000200977	-0.841073	251.876	212.989	223.322	122.666	134.258	127.471
WBGene00046210	21ur-5266	IV	13940535	13940555	1	0.974453	-0.937224	0	0.448399	0	0	0	0
WBGene00046211	21ur-3035	IV	16986551	16986571	1	1	0.0123281	1.00549	2.24199	2.84487	1.7037	2.23763	2.12452
WBGene00046212	21ur-2987	IV	6080137	6080157	1	0.795039	-1.80768	0	1.3452	0.711217	0	0.559406	0
WBGene00046213	21ur-4622	IV	5105257	5105277	-1	0.57607	-0.26596	133.228	126.897	126.597	125.648	95.0991	99.8523
WBGene00046214	21ur-3184	IV	17027431	17027451	-1	1	0.00550014	450.461	532.698	566.129	514.091	544.862	495.012
WBGene00046215	21ur-377	IV	14682817	14682837	1	0.897296	-0.626152	5.02747	4.48399	2.84487	1.27777	2.79703	4.24903
WBGene00046216	21ur-3528	IV	14103645	14103665	-1	0.371002	1.13617	2.51373	4.03559	1.42243	5.1111	6.15347	7.08172
WBGene00046217	21ur-3408	IV	16980062	16980082	1	1	0.123284	0.502747	0.896797	0	0.425925	1.11881	0
WBGene00046218	21ur-2688	IV	15387098	15387118	1	0.468032	0.2448	204.618	201.331	266.706	296.869	260.683	235.113
WBGene00046219	21ur-38	IV	16789030	16789050	1	0.974453	-0.044874	134.736	111.203	134.42	129.907	124.748	112.599
WBGene00046220	21ur-3131	IV	5770496	5770516	-1	0.570096	-0.696787	25.1373	25.5587	16.358	8.94442	13.9852	19.1206
WBGene00046221	21ur-3061	IV	15755887	15755907	1	0.974453	-0.278947	13.5742	13.452	5.68974	8.09257	6.71288	12.7471
WBGene00046222	21ur-5453	IV	14910568	14910588	-1	1	-0.0215436	56.3076	64.5694	78.9451	73.685	71.604	49.572
WBGene00046223	21ur-5217	IV	15763871	15763891	-1	0.000993642	2.4552	3.01648	5.82918	0.711217	28.5369	15.6634	10.6226
WBGene00046224	21ur-4164	IV	15210872	15210892	-1	0.166721	-0.696083	40.2197	43.0463	32.0048	22.9999	25.1733	23.3697
WBGene00046225	21ur-2035	IV	13960652	13960672	-1	0.0171597	-1.45972	37.2032	34.5267	16.358	10.2222	9.50991	12.7471
WBGene00046226	21ur-3271	IV	16118282	16118302	-1	1	0.00630292	8.54669	9.41637	10.6683	10.2222	7.83169	10.6226
WBGene00046227	21ur-1936	IV	13957711	13957731	-1	0.508048	1.82315	0	1.3452	0	2.12962	1.11881	2.12452
WBGene00046228	21ur-692	IV	15973139	15973159	1	0.897265	0.203931	52.7884	40.8043	46.2291	54.5183	52.5842	53.8211
WBGene00046229	21ur-4699	IV	15161495	15161515	1	0.427524	0.346323	46.2527	52.911	51.2076	56.222	67.6882	67.9845
WBGene00046230	21ur-1835	IV	15912426	15912446	-1	0.201287	-0.686661	28.6566	28.2491	27.0262	15.7592	19.5792	16.9961
WBGene00046231	21ur-102	IV	14265720	14265740	1	0.974453	0.0499188	314.217	330.47	374.1	445.517	367.53	238.654
WBGene00046232	21ur-1053	IV	14481731	14481751	1	0.778884	0.764865	2.51373	2.24199	0	2.55555	3.35644	2.83269
WBGene00046233	21ur-4845	IV	14951696	14951716	1	0.350983	-0.446715	74.9092	78.9182	68.988	59.6294	48.6684	55.2374
WBGene00046234	21ur-2303	IV	15627048	15627068	-1	0.957439	0.645544	3.01648	0.448399	1.42243	3.83332	2.23763	1.41634
WBGene00046235	21ur-3441	IV	15360101	15360121	1	1	0.0245638	0.502747	0	0	0	0	0.708172
WBGene00046236	21ur-4426	IV	16825885	16825905	1	0.657198	0.372444	70.8873	60.5338	56.1861	61.3331	93.9803	88.5215
WBGene00046237	21ur-1968	IV	14493147	14493167	-1	0.501692	-0.725451	22.1208	13.452	11.3795	6.38887	7.27228	15.5798
WBGene00046238	21ur-5086	IV	15258834	15258854	1	0.0394397	-0.48793	354.436	286.078	264.573	202.314	213.134	231.572
WBGene00046239	21ur-881	IV	16191948	16191968	-1	0.310042	-0.776803	29.1593	26.0071	19.2029	11.074	13.9852	19.1206
WBGene00046240	21ur-4792	IV	14987901	14987921	1	0.0568323	-0.551899	140.769	108.961	149.356	97.1108	96.7773	76.4826
WBGene00046241	21ur-3516	IV	16085325	16085345	1	0.850743	-0.919093	4.52472	2.24199	2.84487	2.98147	0.559406	1.41634
WBGene00046242	21ur-4291	IV	15477247	15477267	1	0.412659	0.628512	16.0879	11.21	14.2243	21.7222	15.6634	26.9105
WBGene00046243	21ur-4581	IV	16072440	16072460	-1	#N/A	#N/A	0	0	0	0	0	0
WBGene00046244	21ur-4326	IV	14226366	14226386	-1	0.0479864	0.734637	60.3296	34.5267	38.4057	68.1479	77.1981	77.1908
WBGene00046245	21ur-4965	IV	5419651	5419671	1	0.0172526	1.63343	2.01099	4.93238	2.84487	9.37034	11.1881	10.6226
WBGene00046246	21ur-4605	IV	14674166	14674186	-1	0.0574518	0.419292	141.775	162.32	181.36	223.61	210.896	212.452
WBGene00046247	21ur-572	IV	16898438	16898458	-1	0.881267	-0.207837	76.9202	94.6121	59.7422	46.8517	88.3862	66.5682
WBGene00046248	21ur-197	IV	17051044	17051064	-1	0.215888	-0.275285	3485.54	3384.96	3638.59	3043.23	2859.13	2779.58
WBGene00046249	21ur-1283	IV	14423518	14423538	1	6.04383e-07	1.62946	80.4395	89.2313	103.126	419.962	259.565	160.755
WBGene00046250	21ur-2119	IV	6183393	6183413	-1	0.535298	-0.622737	10.0549	11.6584	12.8019	9.79627	4.47525	7.78989
WBGene00046251	21ur-579	IV	14322337	14322357	-1	0.365471	-1.34927	11.5632	9.41637	4.2673	3.4074	1.11881	5.66538
WBGene00046252	21ur-390	IV	5181672	5181692	1	0.974453	0.562304	0	0	1.42243	1.27777	0.559406	0
WBGene00046253	21ur-5384	IV	15101237	15101257	1	1	-0.00854942	434.373	389.21	556.883	503.869	476.055	388.786
WBGene00046254	21ur-1273	IV	15869521	15869541	1	0.92531	-0.0928787	545.48	541.217	596	618.443	512.976	442.608
WBGene00046255	21ur-1038	IV	14997273	14997293	-1	0.732739	0.333104	15.5851	13.9004	15.6468	14.9074	21.8169	20.537
WBGene00046256	21ur-3196	IV	15544982	15545002	1	3.22751e-15	1.64369	51.7829	51.1174	49.074	183.573	158.871	131.012
WBGene00046257	21ur-4577	IV	6185415	6185435	1	0.937585	0.227646	20.6126	11.6584	13.5131	18.3148	15.6634	19.8288
WBGene00046258	21ur-654	IV	15146595	15146615	-1	0.974453	0.246453	1.50824	1.79359	0.711217	1.7037	1.11881	2.12452
WBGene00046259	21ur-4511	IV	14890805	14890825	-1	0.0149615	-0.863336	65.8598	68.1566	64.0095	30.6666	31.3268	48.1557
WBGene00046260	21ur-2695	IV	15655042	15655062	-1	0.994911	0.543138	0.502747	0.896797	0	0	0	2.12452
WBGene00046261	21ur-4114	IV	5612254	5612274	-1	0.827457	-0.608348	11.0604	7.17438	3.55609	4.25925	3.35644	7.08172
WBGene00046262	21ur-21	IV	6186929	6186949	1	0.976787	-0.365628	1.50824	0.448399	0	0.851849	0	0.708172
WBGene00046263	21ur-3635	IV	15945883	15945903	1	0.974453	-0.222241	2.51373	3.13879	1.42243	1.27777	2.23763	2.83269
WBGene00046264	21ur-1258	IV	14392623	14392643	1	6.09257e-13	1.55745	44.7444	40.3559	53.3413	142.259	144.327	116.14
WBGene00046265	21ur-2903	IV	16384155	16384175	-1	0.435545	-0.257961	1526.34	1360.44	1722.57	1470.72	1336.42	1043.85
WBGene00046266	21ur-4849	IV	15772384	15772404	-1	0.0891324	1.91355	2.51373	1.3452	0	5.53702	4.47525	5.66538
WBGene00046267	21ur-297	IV	6195544	6195564	1	0.655685	-1.50482	3.01648	4.03559	1.42243	0	1.11881	2.12452
WBGene00046268	21ur-416	IV	14871549	14871569	1	0.930086	-1.59938	1.50824	1.79359	0.711217	0	0	1.41634
WBGene00046269	21ur-4638	IV	14508127	14508147	-1	0.306423	0.690219	32.6785	39.4591	37.6945	37.9073	93.4209	46.0312
WBGene00046270	21ur-2058	IV	5072747	5072767	-1	0.000146014	1.7238	6.03296	5.38078	8.5346	26.4073	16.7822	20.537
WBGene00046271	21ur-1762	IV	15171426	15171446	1	0.974453	0.0831566	105.577	92.8185	124.463	123.518	100.693	116.14
WBGene00046272	21ur-4915	IV	5342519	5342539	-1	0.237569	1.0555	4.02197	4.03559	0.711217	6.38887	6.71288	6.37355
WBGene00046273	21ur-4134	IV	14475277	14475297	-1	0.0478472	-0.717844	147.807	141.246	96.0143	59.6294	78.8763	97.7277
WBGene00046274	21ur-597	IV	16207352	16207372	1	0.974453	0.140957	27.1483	22.8683	18.4916	17.037	29.0891	30.4514
WBGene00046275	21ur-1241	IV	13609342	13609362	-1	1	0.0216989	0.502747	2.24199	0	0	2.23763	0.708172
WBGene00046276	21ur-3809	IV	16705110	16705130	1	0.862344	0.146185	534.922	588.299	670.678	571.165	769.743	643.728
WBGene00046277	21ur-2131	IV	14590598	14590618	1	0.901652	-0.281887	20.1099	17.0391	16.358	20.8703	11.1881	11.3308
WBGene00046278	21ur-610	IV	16112671	16112691	-1	0.988704	-0.161212	5.02747	3.58719	1.42243	2.12962	2.23763	4.9572
WBGene00046279	21ur-2442	IV	15921889	15921909	-1	0.0871985	1.18624	8.04395	4.48399	2.13365	11.5	12.3069	10.6226
WBGene00046280	21ur-3189	IV	17202863	17202883	-1	0.204803	0.74186	21.1154	8.07118	15.6468	30.6666	21.8169	21.2452
WBGene00046281	21ur-606	IV	16020311	16020331	-1	0.580237	-0.753415	17.5961	13.0036	6.40095	6.38887	6.15347	9.91441
WBGene00046282	21ur-1640	IV	17050724	17050744	1	0.824119	0.861911	1.50824	1.3452	2.84487	4.68517	1.11881	4.24903
WBGene00046283	21ur-499	IV	15747709	15747729	1	0.641027	1.8056	2.01099	0.448399	0	0.425925	5.03466	3.54086
WBGene00046284	21ur-5242	IV	14526835	14526855	1	0.440714	0.67762	11.0604	6.72598	11.3795	15.7592	13.4258	16.9961
WBGene00046285	21ur-311	IV	16838685	16838705	1	0.928325	-0.367679	587.208	515.21	497.852	96.6849	369.768	774.74
WBGene00046286	21ur-5233	IV	14354650	14354670	-1	0.974453	-0.0713997	45.7499	43.0463	37.6945	31.9443	40.8367	48.8639
WBGene00046287	21ur-4694	IV	14244607	14244627	-1	0.023209	1.38397	6.53571	9.86477	9.24582	16.1851	29.6485	21.2452
WBGene00046288	21ur-2915	IV	16733050	16733070	1	0.985476	-0.735507	0.502747	0.448399	0	0	0	0.708172
WBGene00046289	21ur-5066	IV	17238857	17238877	1	0.974453	-0.352839	2.51373	3.13879	1.42243	1.27777	1.67822	2.83269
WBGene00046290	21ur-5038	IV	15657510	15657530	-1	8.38833e-08	1.53158	22.1208	21.9715	22.0477	69.4257	53.703	67.9845
WBGene00046291	21ur-337	IV	13754641	13754661	1	0.0360661	1.608	3.01648	2.69039	2.84487	12.7777	5.59406	7.08172
WBGene00046292	21ur-1079	IV	16175955	16175975	-1	0.628674	-0.278595	286.063	268.591	325.737	275.147	279.144	169.253
WBGene00046293	21ur-1702	IV	16838691	16838711	-1	0.000283821	1.40902	32.6785	37.6655	61.1647	140.981	118.594	85.6888
WBGene00046294	21ur-2380	IV	5957514	5957534	-1	0.974453	0.986352	0	0	0	0	0.559406	0
WBGene00046295	21ur-1206	IV	15278052	15278072	-1	0.825609	-0.16157	125.687	107.616	128.019	100.092	109.644	113.308
WBGene00046296	21ur-2530	IV	16183242	16183262	-1	0.0907451	-0.711553	59.8268	52.4626	44.0955	28.5369	29.0891	38.9495
WBGene00046297	21ur-1234	IV	14239635	14239655	1	0.175592	-0.65987	48.7664	40.3559	61.1647	37.0554	27.9703	29.0351
WBGene00046298	21ur-2468	IV	14881563	14881583	1	0.974453	-0.288931	3.51923	3.58719	1.42243	2.12962	2.23763	2.83269
WBGene00046299	21ur-1867	IV	15697322	15697342	1	0.974453	-0.551732	1.00549	0.448399	0	0.425925	0.559406	0
WBGene00046300	21ur-554	IV	14669639	14669659	1	0.716486	0.333891	3077.31	4074.15	7202.49	7592.11	5929.71	4567
WBGene00046301	21ur-4813	IV	15628232	15628252	-1	0.76677	0.436613	6.53571	8.07118	16.358	16.1851	12.8663	11.3308
WBGene00046302	21ur-2374	IV	15164703	15164723	1	0.0404299	-0.4568	909.469	720.128	857.728	538.795	678.001	595.573
WBGene00046303	21ur-4759	IV	15820813	15820833	-1	0.452128	-1.67515	5.02747	3.13879	4.2673	0.851849	1.67822	1.41634
WBGene00046304	21ur-5112	IV	13615765	13615785	-1	0.0116664	1.52434	5.02747	4.48399	7.11217	15.3333	21.8169	9.20624
WBGene00046305	21ur-3997	IV	16092545	16092565	1	0.974453	-0.557548	0.502747	0.448399	0.711217	0	1.11881	0
WBGene00046306	21ur-1913	IV	16718714	16718734	1	#N/A	#N/A	0	0	0	0	0	0
WBGene00046307	21ur-648	IV	15864182	15864202	-1	0.974453	-0.0614731	597.263	506.242	616.625	652.942	545.421	447.565
WBGene00046308	21ur-362	IV	15245736	15245756	-1	0.000642719	2.64283	1.00549	2.69039	0.711217	11.9259	6.15347	11.3308
WBGene00046309	21ur-2727	IV	16069473	16069493	-1	0.974453	0.605487	2.01099	0.896797	0	0.851849	1.11881	2.83269
WBGene00046310	21ur-4644	IV	14009393	14009413	1	0.103462	-1.37157	12.5687	10.7616	9.24582	3.4074	4.47525	4.9572
WBGene00046311	21ur-245	IV	16699591	16699611	-1	0.974453	-0.0549029	326.283	331.367	435.265	396.11	354.104	298.14
WBGene00046312	21ur-2870	IV	16252310	16252330	-1	0.347255	-0.5763	41.2252	51.5658	24.8926	23.4259	26.2921	30.4514
WBGene00046313	21ur-3912	IV	5820979	5820999	1	0.671937	0.888449	2.01099	1.79359	1.42243	3.4074	2.23763	4.24903
WBGene00046314	21ur-5435	IV	16254982	16255002	-1	0.648859	0.812811	3.51923	4.93238	4.2673	5.1111	12.3069	4.9572
WBGene00046315	21ur-4869	IV	14976397	14976417	1	0.0792713	0.603197	56.8104	66.363	95.3031	133.74	109.084	84.9806
WBGene00046316	21ur-5262	IV	13824165	13824185	1	1	0.0154635	337.846	321.502	402.549	392.277	333.966	344.172
WBGene00046317	21ur-3509	IV	15660307	15660327	1	0.703962	0.249313	82.4504	74.4342	85.346	91.5738	105.168	90.646
WBGene00046318	21ur-4870	IV	5099574	5099594	1	0.937656	-1.42681	0.502747	2.69039	0	0	0.559406	0.708172
WBGene00046319	21ur-193	IV	4845245	4845265	1	0.462856	3.01371	0.502747	0	0	0.425925	2.23763	2.12452
WBGene00046320	21ur-2840	IV	14747096	14747116	1	0.608214	1.48131	0.502747	0	1.42243	2.12962	1.67822	0.708172
WBGene00046321	21ur-3611	IV	5925397	5925417	1	#N/A	#N/A	0	0	0	0	0	0
WBGene00046322	21ur-3919	IV	16239449	16239469	1	0.858826	0.218093	106.582	106.719	143.666	181.444	125.866	105.518
WBGene00046323	21ur-3143	IV	17015779	17015799	-1	0.234708	-0.686266	28.6566	30.0427	29.1599	17.4629	16.2228	21.2452
WBGene00046324	21ur-2168	IV	15220415	15220435	-1	0.132478	-0.579865	56.3076	59.637	64.7207	44.2962	40.2773	35.4086
WBGene00046325	21ur-2449	IV	15732697	15732717	1	0.177632	3.29781	0	0	0.711217	1.27777	1.11881	3.54086
WBGene00046326	21ur-585	IV	15214367	15214387	-1	0.974453	0.0806481	11.0604	14.3488	15.6468	14.0555	11.7475	17.7043
WBGene00046327	21ur-67	IV	5505629	5505649	-1	0.991913	-0.608536	1.00549	0	0.711217	0	1.11881	0
WBGene00046328	21ur-456	IV	15118472	15118492	-1	0.549022	-0.312764	63.3461	58.2918	54.0525	40.8888	48.6684	53.1129
WBGene00046329	21ur-2278	IV	15066797	15066817	-1	0.974453	-0.937224	0	0.448399	0	0	0	0
WBGene00046330	21ur-4031	IV	15810938	15810958	1	0.481818	0.999896	1.00549	4.03559	2.13365	3.83332	7.27228	3.54086
WBGene00046331	21ur-4971	IV	15393157	15393177	-1	0.00586313	0.706895	48.7664	45.2883	43.3842	67.722	76.6387	81.4398
WBGene00046332	21ur-3261	IV	15115332	15115352	1	0.924526	-2.5987	0	0.448399	1.42243	0	0	0
WBGene00046333	21ur-4319	IV	16732810	16732830	1	0.508916	0.421803	2467.48	2485.92	3999.88	5592.39	3515.31	2882.97
WBGene00046334	21ur-4629	IV	16799770	16799790	-1	0.881642	-0.202294	49.2692	65.0178	49.7852	56.222	43.6337	42.4903
WBGene00046335	21ur-2814	IV	16167638	16167658	1	0.974453	-0.0887745	643.516	593.231	891.866	770.498	657.862	569.37
WBGene00046336	21ur-1248	IV	5932726	5932746	-1	0.974453	-0.438837	1.50824	2.24199	1.42243	0	0.559406	3.54086
WBGene00046337	21ur-2162	IV	5833693	5833713	-1	0.999078	0.469694	0	0.896797	0	1.27777	0	0
WBGene00046338	21ur-5002	IV	13699915	13699935	-1	1	0.0245637	0	0.448399	0	0.425925	0	0
WBGene00046339	21ur-3454	IV	14382935	14382955	-1	0.00649062	-0.548071	516.823	549.288	422.463	330.943	329.49	359.751
WBGene00046340	21ur-5029	IV	15495936	15495956	-1	0.48511	0.974336	2.51373	3.13879	2.13365	7.66664	3.91584	3.54086
WBGene00046341	21ur-1154	IV	16562186	16562206	-1	1	-0.0117496	80.4395	105.374	111.661	67.2961	126.985	101.269
WBGene00046342	21ur-2871	IV	16593668	16593688	1	0.883355	-0.444261	13.0714	9.41637	4.97852	8.94442	5.59406	5.66538
WBGene00046343	21ur-2955	IV	15089824	15089844	1	4.68235e-07	1.05836	76.9202	66.363	89.6133	181.444	159.99	138.802
WBGene00046344	21ur-4309	IV	15662439	15662459	1	0.974453	-0.291077	7.5412	4.48399	5.68974	1.27777	1.67822	12.0389
WBGene00046345	21ur-3647	IV	15815227	15815247	1	0.00156018	-0.732913	158.868	145.73	125.174	86.0368	89.505	83.5643
WBGene00046346	21ur-4399	IV	13987340	13987360	-1	0.724943	0.601756	4.52472	5.38078	4.97852	11.5	5.59406	4.9572
WBGene00046347	21ur-1187	IV	15904582	15904602	1	0.0235044	-1.0858	39.717	39.0107	32.0048	14.4814	14.5446	24.0779
WBGene00046348	21ur-342	IV	15160810	15160830	1	0.0190066	-0.466907	1141.23	1211.12	1147.19	718.535	850.298	965.947
WBGene00046349	21ur-1886	IV	14159715	14159735	1	0.0950991	-1.142	36.1978	29.5943	15.6468	9.37034	13.9852	14.1634
WBGene00046350	21ur-3314	IV	13701023	13701043	1	0.617043	-2.51083	2.01099	0	1.42243	0	0.559406	0
WBGene00046351	21ur-3150	IV	15399455	15399475	1	0.4268	-1.32212	10.0549	7.62278	9.24582	0.851849	3.91584	6.37355
WBGene00046352	21ur-3433	IV	5761176	5761196	-1	0.778884	0.625377	3.01648	3.58719	2.13365	5.96294	3.35644	4.24903
WBGene00046353	21ur-2960	IV	14125770	14125790	1	0.53378	1.89347	0.502747	0.896797	0	1.7037	0.559406	3.54086
WBGene00046354	21ur-4268	IV	14895171	14895191	1	0.563134	0.613435	9.55218	6.27758	4.2673	13.2037	11.7475	5.66538
WBGene00046355	21ur-4549	IV	5803585	5803605	1	#N/A	#N/A	0	0	0	0	0	0
WBGene00046356	21ur-4831	IV	14368459	14368479	1	1	0.00948268	76.4175	62.7758	65.432	79.222	68.2476	57.3619
WBGene00046357	21ur-2820	IV	15366573	15366593	-1	0.114288	0.68731	28.6566	30.0427	29.8711	43.0184	36.9208	63.7355
WBGene00046358	21ur-4185	IV	14569218	14569238	-1	0.838841	-0.185045	319.244	353.338	494.296	420.388	335.084	267.689
WBGene00046359	21ur-1750	IV	4961243	4961263	-1	0.974453	0.823248	0	0.448399	0	0.425925	0.559406	0
WBGene00046360	21ur-4712	IV	14564280	14564300	1	0.738029	-0.447422	29.662	22.8683	12.0907	12.3518	12.8663	23.3697
WBGene00046361	21ur-5450	IV	14495784	14495804	1	0.220408	0.710523	85.9697	118.826	125.174	145.24	248.376	145.883
WBGene00046362	21ur-3114	IV	14489179	14489199	1	0.917233	0.194657	86.9752	111.651	108.105	94.1293	152.159	104.809
WBGene00046363	21ur-4436	IV	15422228	15422248	1	0.00185786	0.61368	168.42	202.676	174.248	303.684	276.347	254.234
WBGene00046364	21ur-4924	IV	16253668	16253688	1	1	0.00181012	0.502747	2.24199	1.42243	0.425925	1.11881	2.83269
WBGene00046365	21ur-532	IV	16782419	16782439	-1	0.255946	1.16823	2.51373	3.58719	4.2673	7.66664	5.59406	9.91441
WBGene00046366	21ur-673	IV	16177805	16177825	-1	0.828601	0.476938	7.03845	9.41637	5.68974	8.09257	10.6287	12.7471
WBGene00046367	21ur-3062	IV	16718183	16718203	-1	0.7781	1.09204	1.50824	0.896797	0	1.27777	2.79703	1.41634
WBGene00046368	21ur-920	IV	14267967	14267987	-1	0.995206	-0.0730851	35.695	31.8363	14.2243	17.037	25.7327	36.1168
WBGene00046369	21ur-4717	IV	14969969	14969989	-1	0.886572	-0.462682	9.04944	12.5552	7.11217	6.38887	5.59406	9.20624
WBGene00046370	21ur-3175	IV	14741860	14741880	1	0.929684	0.186383	104.069	114.342	187.05	172.499	154.396	132.428
WBGene00046371	21ur-1570	IV	15961111	15961131	1	0.974453	0.928754	0	0.896797	0	0	1.11881	0.708172
WBGene00046372	21ur-4897	IV	15273825	15273845	1	0.355488	2.23913	0.502747	0.448399	1.42243	3.83332	3.91584	2.83269
WBGene00046373	21ur-4857	IV	16107311	16107331	1	0.974453	0.0577355	708.873	849.267	1120.17	909.775	1048.89	827.145
WBGene00046374	21ur-4539	IV	14976503	14976523	1	0.997087	0.0303497	66.8653	64.121	57.6086	64.3146	67.6882	60.9028
WBGene00046375	21ur-3397	IV	16112451	16112471	-1	0.974453	0.986352	0	0	0	0	0.559406	0
WBGene00046376	21ur-81	IV	17173257	17173277	-1	0.435061	-1.21084	6.53571	4.93238	4.97852	2.12962	2.23763	2.83269
WBGene00046377	21ur-3921	IV	16792626	16792646	-1	0.919129	-0.965645	5.02747	1.79359	0	0.425925	1.11881	2.12452
WBGene00046378	21ur-1103	IV	4840702	4840722	-1	0.974453	1.61604	0	0	0	0.851849	0	0
WBGene00046379	21ur-147	IV	14395216	14395236	-1	0.556501	-0.314655	103.063	101.338	94.5919	87.7405	79.9951	72.2336
WBGene00046380	21ur-3107	IV	16281978	16281998	1	1	0.0245638	0	0.448399	0	0	0.559406	0
WBGene00046381	21ur-4508	IV	16557825	16557845	-1	0.98946	-0.0532572	26.1428	43.4947	46.9403	37.4814	50.3466	23.3697
WBGene00046382	21ur-5258	IV	14457023	14457043	-1	0.974453	1.90837	0	0	0	0.425925	0	0.708172
WBGene00046383	21ur-3174	IV	14250081	14250101	-1	0.854818	-1.77796	0.502747	2.69039	0	0.851849	0	0
WBGene00046384	21ur-4931	IV	15821329	15821349	-1	0.0933857	-0.515572	289.079	265.9	219.055	140.129	196.911	206.786
WBGene00046385	21ur-5441	IV	14735127	14735147	-1	0.974453	1.18502	0	0.448399	0	0	0	1.41634
WBGene00046386	21ur-1119	IV	15483473	15483493	1	1	0.0366341	1.00549	1.79359	0	0	1.67822	1.41634
WBGene00046387	21ur-350	IV	15719723	15719743	1	0.239381	-0.581602	37.706	38.1139	27.7375	22.9999	20.1386	26.9105
WBGene00046388	21ur-5106	IV	15180632	15180652	1	0.239171	0.989045	9.55218	5.82918	3.55609	11.5	12.8663	14.1634
WBGene00046389	21ur-492	IV	15389512	15389532	1	0.834077	0.214217	1251.34	1422.32	2206.2	2195.64	1917.09	1545.23
WBGene00046390	21ur-1602	IV	14249986	14250006	1	0.158714	0.573695	33.1813	29.1459	34.1384	63.0368	40.8367	37.5331
WBGene00046391	21ur-2720	IV	16728095	16728115	1	0.00750649	-0.653433	767.191	745.687	588.176	462.128	438.015	436.234
WBGene00046392	21ur-2453	IV	14908748	14908768	-1	0.770463	-1.173	2.51373	2.69039	0.711217	0.851849	1.11881	0.708172
WBGene00046393	21ur-5287	IV	16605821	16605841	1	0.570605	1.40938	2.01099	0	1.42243	2.98147	1.67822	4.24903
WBGene00046394	21ur-1503	IV	15421668	15421688	1	0.379958	-0.464572	108.593	99.5445	97.4367	78.796	68.2476	74.3581
WBGene00046395	21ur-4681	IV	13727066	13727086	-1	1	0.0396633	3.01648	6.27758	12.8019	8.09257	8.3911	5.66538
WBGene00046396	21ur-5414	IV	15687820	15687840	1	0.567458	2.39397	0.502747	0	0	0	1.11881	2.12452
WBGene00046397	21ur-1460	IV	15914825	15914845	1	0.974453	-1.25784	0.502747	0.896797	0	0.425925	0	0
WBGene00046398	21ur-2584	IV	13762282	13762302	-1	0.63224	0.537003	73.9037	139.452	94.5919	71.9813	203.065	172.794
WBGene00046399	21ur-2750	IV	16244086	16244106	1	0.0492003	2.34461	0	1.3452	2.13365	4.68517	5.03466	7.08172
WBGene00046400	21ur-769	IV	17156745	17156765	1	0.919321	-0.155603	60.8323	66.8114	77.5227	66.4442	66.01	50.2802
WBGene00046401	21ur-2251	IV	15555447	15555467	-1	0.822897	-1.26094	2.01099	3.58719	2.13365	1.27777	0.559406	1.41634
WBGene00046402	21ur-954	IV	5438539	5438559	1	0.681206	0.228219	136.244	141.694	130.864	128.203	188.52	163.588
WBGene00046403	21ur-3642	IV	16716264	16716284	-1	0.952325	0.157153	601.285	621.032	900.401	1025.63	760.233	578.577
WBGene00046404	21ur-4955	IV	5193423	5193443	-1	0.0236301	1.30674	4.02197	6.72598	7.11217	16.1851	10.6287	16.9961
WBGene00046405	21ur-1198	IV	6180344	6180364	-1	0.974453	-0.11256	9.04944	14.7972	7.82339	9.79627	10.6287	9.20624
WBGene00046406	21ur-5338	IV	14369172	14369192	-1	0.934429	0.112402	237.296	253.345	312.935	307.943	320.54	237.238
WBGene00046407	21ur-1897	IV	15678016	15678036	1	0.829683	-0.361581	35.1923	31.3879	24.1814	10.6481	27.9703	33.2841
WBGene00046408	21ur-1525	IV	15433612	15433632	-1	0.664874	1.6814	0	0.896797	0.711217	0.851849	2.23763	2.12452
WBGene00046409	21ur-241	IV	14624948	14624968	-1	0.992387	-0.0560699	32.1758	34.0783	20.6253	20.8703	30.7674	33.2841
WBGene00046410	21ur-645	IV	13706049	13706069	-1	2.27661e-08	1.54468	21.1154	22.4199	28.4487	85.1849	61.5347	59.4865
WBGene00046411	21ur-4453	IV	16897545	16897565	1	2.00445e-06	1.83154	9.55218	6.27758	7.11217	31.0925	29.0891	20.537
WBGene00046412	21ur-3834	IV	15087132	15087152	-1	0.974453	1.08038	0	0.448399	0	0	0.559406	0.708172
WBGene00046413	21ur-4212	IV	15232644	15232664	1	0.959526	-1.04659	0	0	1.42243	0	0.559406	0
WBGene00046414	21ur-4330	IV	15981548	15981568	1	0.752989	0.496469	4.02197	8.07118	7.82339	11.074	10.0693	6.37355
WBGene00046415	21ur-1906	IV	15707250	15707270	-1	0.963888	-0.119006	675.189	636.278	999.971	960.46	636.605	527.588
WBGene00046416	21ur-3796	IV	5614621	5614641	-1	0.974453	-0.577446	2.01099	0.448399	0.711217	0.425925	1.67822	0
WBGene00046417	21ur-1212	IV	4876800	4876820	1	0.979648	-0.186537	3.01648	7.62278	0.711217	1.27777	5.59406	3.54086
WBGene00046418	21ur-1310	IV	15413573	15413593	-1	0.880525	-1.77219	1.00549	0	0	0	0	0
WBGene00046419	21ur-1228	IV	16363632	16363652	1	0.785986	0.539657	4.02197	3.58719	3.55609	3.83332	4.47525	8.49806
WBGene00046420	21ur-403	IV	15621476	15621496	-1	#N/A	#N/A	0	0	0	0	0	0
WBGene00046421	21ur-281	IV	5721217	5721237	1	0.974453	0.986352	0	0	0	0	0	0.708172
WBGene00046422	21ur-5358	IV	14668197	14668217	1	0.499675	-0.346092	87.4779	90.5765	71.1217	64.7405	58.7377	73.6499
WBGene00046423	21ur-4341	IV	14587486	14587506	1	0.931198	0.189882	50.7774	53.3594	80.3675	101.796	53.703	52.4047
WBGene00046424	21ur-1084	IV	5119729	5119749	1	#N/A	#N/A	0	0	0	0	0	0
WBGene00046425	21ur-3843	IV	5896155	5896175	1	1	-0.0127546	149.818	136.762	154.334	173.777	134.258	126.763
WBGene00046426	21ur-3120	IV	14408847	14408867	-1	0.541837	-0.301483	443.422	381.587	405.394	418.684	336.763	240.779
WBGene00046427	21ur-5254	IV	16799356	16799376	-1	0.938003	-1.74301	1.50824	0.448399	0	0	0	0.708172
WBGene00046428	21ur-2285	IV	16069992	16070012	-1	0.997198	0.0305142	71.8928	56.0498	49.7852	57.0739	59.2971	66.5682
WBGene00046429	21ur-5109	IV	15997222	15997242	-1	0.516792	0.356893	908.463	921.459	1409.63	1501.81	1292.79	1351.9
WBGene00046430	21ur-4986	IV	14568960	14568980	1	0.00642055	-0.683098	143.786	127.794	128.019	83.9071	75.5199	89.9379
WBGene00046431	21ur-3927	IV	14704960	14704980	-1	0.828881	0.75704	1.00549	4.48399	2.13365	3.83332	5.03466	4.24903
WBGene00046432	21ur-2097	IV	14728245	14728265	1	1	0.0245638	0.502747	0	0	0	0.559406	0
WBGene00046433	21ur-3008	IV	15273585	15273605	1	1	0.0739869	7.03845	6.27758	7.11217	7.66664	3.35644	10.6226
WBGene00046434	21ur-755	IV	13874671	13874691	1	1	0.0831045	0	0.896797	0	0.425925	0.559406	0
WBGene00046435	21ur-1626	IV	5035214	5035234	-1	0.611177	-0.394254	46.2527	42.5979	35.5609	30.6666	28.5297	36.1168
WBGene00046436	21ur-4588	IV	5099218	5099238	1	1	0.0245637	0.502747	0	0	0	0.559406	0
WBGene00046437	21ur-1146	IV	5149287	5149307	-1	1.42555e-07	1.77004	22.6236	34.0783	39.8282	132.037	109.644	84.2725
WBGene00046438	21ur-2159	IV	15346684	15346704	1	0.974453	0.108511	38.7115	58.2918	63.2983	61.3331	64.8911	45.323
WBGene00046439	21ur-2711	IV	17046023	17046043	1	0.995043	0.112127	7.5412	4.03559	6.40095	2.12962	8.3911	9.20624
WBGene00046440	21ur-1703	IV	14234237	14234257	1	0.265362	-0.608719	141.272	137.658	86.0573	44.7221	100.134	96.3114
WBGene00046441	21ur-2888	IV	5335354	5335374	1	0.18424	1.97046	1.50824	0.896797	0.711217	2.55555	8.3911	1.41634
WBGene00046442	21ur-4458	IV	15609485	15609505	1	0.974453	-0.0754726	109.599	91.4733	96.7255	115.851	95.6585	69.4009
WBGene00046443	21ur-2030	IV	15967787	15967807	-1	1	0.0050092	36.1978	36.3203	39.1169	39.1851	36.3614	36.1168
WBGene00046444	21ur-2920	IV	15245179	15245199	-1	0.903259	2.79985	0	0	0	0	0	2.12452
WBGene00046445	21ur-2974	IV	14144752	14144772	-1	0.763469	-0.200897	108.091	118.377	118.062	90.7219	100.693	109.058
WBGene00046446	21ur-4004	IV	15918086	15918106	-1	0.0115879	0.986557	15.0824	12.5552	16.358	25.1296	31.8862	29.7432
WBGene00046447	21ur-701	IV	16122701	16122721	1	1	0.0229119	16.0879	15.694	12.8019	18.7407	12.3069	14.1634
WBGene00046448	21ur-1423	IV	4942507	4942527	-1	0.808356	1.12949	1.50824	1.79359	0	1.7037	1.11881	4.9572
WBGene00046449	21ur-4410	IV	15486615	15486635	-1	1	0.0245637	0.502747	0	0	0	0	0.708172
WBGene00046450	21ur-2410	IV	16380638	16380658	1	1.28002e-05	1.67558	13.5742	13.452	12.8019	48.5554	44.1931	33.9923
WBGene00046451	21ur-3016	IV	15835924	15835944	-1	0.88172	-0.156437	76.9202	65.0178	76.1002	76.2405	60.4159	57.3619
WBGene00046452	21ur-5355	IV	15532638	15532658	-1	0.79621	-1.0755	1.50824	2.69039	2.84487	0.851849	1.11881	1.41634
WBGene00046453	21ur-5040	IV	14635051	14635071	-1	#N/A	#N/A	0	0	0	0	0	0
WBGene00046454	21ur-1439	IV	13612687	13612707	1	0.131529	1.91239	0.502747	0.448399	3.55609	5.1111	5.59406	4.24903
WBGene00046455	21ur-156	IV	15592496	15592516	-1	0.979211	-0.0461505	169.426	150.662	220.477	212.11	180.129	128.179
WBGene00046456	21ur-234	IV	14681084	14681104	1	0.952325	-0.33261	8.04395	7.62278	7.82339	5.1111	7.27228	6.37355
WBGene00046457	21ur-4951	IV	13828642	13828662	1	0.959526	-0.119692	234.28	252	231.857	183.999	187.961	291.059
WBGene00046458	21ur-753	IV	15793319	15793339	1	0.546848	1.9519	0.502747	0.448399	0	0.851849	0.559406	2.83269
WBGene00046459	21ur-5280	IV	16529118	16529138	-1	0.974453	0.986352	0	0	0	0	0.559406	0
WBGene00046460	21ur-2847	IV	5213742	5213762	1	0.812427	0.590915	4.02197	1.79359	9.24582	8.09257	7.83169	5.66538
WBGene00046461	21ur-2142	IV	16387132	16387152	1	0.974453	0.139139	18.0989	16.5907	24.1814	23.8518	25.1733	14.8716
WBGene00046462	21ur-4554	IV	14502715	14502735	-1	0.385092	-0.239165	4361.33	4475.02	4971.41	4582.1	3762.01	3350.36
WBGene00046463	21ur-83	IV	5979490	5979510	1	0.896542	0.295189	13.5742	27.3523	19.9141	20.4444	35.2426	19.1206
WBGene00046464	21ur-1768	IV	15664760	15664780	-1	0.443865	1.50624	0.502747	2.69039	0	2.55555	3.91584	3.54086
WBGene00046465	21ur-871	IV	15314222	15314242	1	1	-0.0554742	7.5412	6.27758	2.13365	0.425925	0.559406	14.8716
WBGene00046466	21ur-158	IV	13807551	13807571	1	0.974453	-0.937224	0.502747	0	0	0	0	0
WBGene00046467	21ur-1494	IV	16887948	16887968	-1	0.974453	0.168029	8.04395	6.72598	2.84487	3.83332	6.71288	9.91441
WBGene00046468	21ur-2203	IV	14011651	14011671	1	0.856853	-0.326619	15.5851	10.3132	11.3795	9.79627	10.0693	9.91441
WBGene00046469	21ur-1141	IV	13842496	13842516	-1	0.974453	-0.937229	0.502747	0	0	0	0	0
WBGene00046470	21ur-4814	IV	15098667	15098687	1	0.810713	-0.190472	584.192	519.694	541.236	630.368	427.387	381.705
WBGene00046471	21ur-115	IV	16909225	16909245	-1	0.976576	0.0685584	22.6236	26.9039	36.9833	31.5184	28.5297	29.7432
WBGene00046472	21ur-4852	IV	15267467	15267487	1	0.824584	-0.273118	52.2856	66.8114	44.8067	48.1295	29.0891	59.4865
WBGene00046473	21ur-2731	IV	15922059	15922079	-1	0.974453	0.182546	3.01648	1.3452	2.13365	2.12962	0.559406	4.9572
WBGene00046474	21ur-2169	IV	16449251	16449271	-1	1	0	0	0	0	0	0	0
WBGene00046475	21ur-4430	IV	6039092	6039112	1	0.881642	0.757369	2.51373	2.24199	0.711217	2.12962	3.91584	3.54086
WBGene00046476	21ur-1163	IV	5499090	5499110	1	0.974453	-0.937224	0	0.448399	0	0	0	0
WBGene00046477	21ur-2396	IV	15229392	15229412	-1	0.974453	1.10309	0	0.896797	0	0	0	2.12452
WBGene00046478	21ur-905	IV	5141919	5141939	-1	0.974453	0.42277	0.502747	1.3452	0.711217	0.425925	1.11881	2.12452
WBGene00046479	21ur-5125	IV	15864621	15864641	-1	0.825609	0.515324	12.5687	8.07118	4.2673	4.68517	12.3069	19.8288
WBGene00046480	21ur-5361	IV	14049246	14049266	1	0.390531	-1.15026	17.0934	9.41637	4.2673	3.83332	3.35644	7.08172
WBGene00046481	21ur-3075	IV	16990872	16990892	1	0.559064	3.38153	0	0	0	1.27777	1.11881	0.708172
WBGene00046482	21ur-97	IV	5952891	5952911	-1	0.0961285	1.65241	3.01648	1.3452	2.84487	7.66664	6.71288	7.78989
WBGene00046483	21ur-4349	IV	14589710	14589730	-1	5.21087e-06	2.14099	5.53021	6.27758	9.24582	20.4444	39.1584	31.8677
WBGene00046484	21ur-3812	IV	16985629	16985649	1	0.980317	-0.302552	0.502747	0.896797	0.711217	0.425925	0	1.41634
WBGene00046485	21ur-1976	IV	16044323	16044343	1	0.974453	-0.937228	0	0	0.711217	0	0	0
WBGene00046486	21ur-561	IV	15659478	15659498	-1	0.974453	1.90795	0	0	0	0.425925	0	0.708172
WBGene00046487	21ur-4518	IV	14832270	14832290	1	0.88172	0.519109	2.01099	2.69039	3.55609	4.68517	3.91584	2.83269
WBGene00046488	21ur-351	IV	14646740	14646760	-1	0.981968	-0.606443	0.502747	0	1.42243	0	0.559406	0.708172
WBGene00046489	21ur-2187	IV	15273246	15273266	-1	0.654735	0.358711	21.1154	19.2811	29.1599	31.5184	24.0545	32.5759
WBGene00046490	21ur-4475	IV	16563995	16564015	-1	0.547054	-0.253665	263.942	204.021	261.728	209.981	175.094	226.615
WBGene00046491	21ur-1317	IV	14269698	14269718	1	0.0430081	-0.840934	93.5109	90.1281	70.4105	38.7591	47.5495	56.6538
WBGene00046492	21ur-876	IV	15965746	15965766	-1	0.190272	-1.48283	8.54669	9.86477	5.68974	2.55555	3.35644	2.83269
WBGene00046493	21ur-1996	IV	15590012	15590032	-1	0.957439	2.2032	0	0	0	0	0	1.41634
WBGene00046494	21ur-4824	IV	14811539	14811559	-1	0.974453	0.986352	0	0	0	0	0.559406	0
WBGene00046495	21ur-765	IV	16459561	16459581	-1	0.978498	-0.0392627	248.357	202.228	222.611	204.018	224.881	226.615
WBGene00046496	21ur-4253	IV	5418442	5418462	-1	0.536945	0.426573	74.9092	117.929	134.42	130.759	203.065	104.809
WBGene00046497	21ur-3346	IV	14087433	14087453	-1	0.501692	1.14776	2.01099	0.896797	2.84487	3.83332	2.23763	6.37355
WBGene00046498	21ur-3866	IV	14289900	14289920	-1	0.738745	0.243708	46.2527	34.0783	40.5394	53.2406	39.7179	49.572
WBGene00046499	21ur-3052	IV	14960988	14961008	1	0.567063	-0.357271	49.2692	43.0463	32.0048	31.5184	32.4456	33.9923
WBGene00046500	21ur-396	IV	15137752	15137772	1	0.525566	-0.614663	35.695	31.8363	19.9141	12.3518	19.5792	26.2024
WBGene00046501	21ur-4401	IV	16696722	16696742	1	0.974453	-0.332262	11.0604	4.93238	4.2673	2.12962	3.91584	10.6226
WBGene00046502	21ur-4310	IV	15957046	15957066	-1	1.64763e-07	2.03416	15.0824	9.41637	14.2243	72.8331	51.4654	31.1596
WBGene00046503	21ur-25	IV	14891432	14891452	1	0.499364	-0.272353	642.007	563.637	588.888	637.183	473.258	372.499
WBGene00046504	21ur-2355	IV	15867089	15867109	-1	0.576796	-0.770032	28.1538	18.8327	13.5131	9.79627	11.1881	14.8716
WBGene00046505	21ur-1775	IV	14731632	14731652	-1	0.974453	1.61669	0	0	0	0.851849	0	0
WBGene00046506	21ur-1726	IV	16096237	16096257	-1	0.974453	0.884238	0.502747	0	0.711217	0.851849	0.559406	0.708172
WBGene00046507	21ur-204	IV	14856606	14856626	-1	0.974453	-0.937224	0	0.448399	0	0	0	0
WBGene00046508	21ur-2708	IV	15872575	15872595	-1	0.825609	0.23753	49.7719	52.0142	76.1002	64.7405	83.911	59.4865
WBGene00046509	21ur-718	IV	5171322	5171342	-1	0.0781302	1.69332	4.02197	0.448399	2.84487	3.83332	12.3069	7.08172
WBGene00046510	21ur-5088	IV	16886580	16886600	1	0.0384859	0.840326	13.0714	16.5907	16.358	24.2777	27.4109	31.1596
WBGene00046511	21ur-5074	IV	5771392	5771412	-1	0.388806	2.58195	0	0.896797	0	3.83332	0	2.12452
WBGene00046512	21ur-4359	IV	16562712	16562732	-1	0.974453	0.103535	24.1318	19.2811	22.0477	22.574	19.0198	29.0351
WBGene00046513	21ur-9	IV	14403686	14403706	1	0.950975	0.118301	130.714	147.523	123.041	127.351	147.124	162.88
WBGene00046514	21ur-2087	IV	6991825	6991845	-1	0.698885	0.611271	3.51923	3.13879	7.11217	8.09257	5.59406	6.37355
WBGene00046515	21ur-3136	IV	15811496	15811516	-1	0.842405	0.910264	2.51373	4.03559	0.711217	1.7037	3.35644	9.20624
WBGene00046516	21ur-212	IV	16794922	16794942	1	0.795965	-0.352571	24.1318	23.7651	22.7589	13.2037	16.2228	26.9105
WBGene00046517	21ur-5064	IV	17037586	17037606	1	0.975198	0.164096	2.01099	2.24199	2.13365	1.7037	2.79703	2.83269
WBGene00046518	21ur-1461	IV	15923720	15923740	1	0.21948	1.09845	6.03296	3.13879	2.13365	4.68517	10.0693	10.6226
WBGene00046519	21ur-3531	IV	13956059	13956079	-1	0.419458	-0.513155	48.7664	52.911	38.4057	24.7036	36.3614	38.2413
WBGene00046520	21ur-4566	IV	14534557	14534577	1	0.0135781	2.98501	1.00549	0.896797	0	4.25925	6.15347	6.37355
WBGene00046521	21ur-3755	IV	17154907	17154927	1	0.827085	0.449504	3.51923	6.72598	4.2673	5.96294	7.83169	6.37355
WBGene00046522	21ur-5324	IV	5106850	5106870	-1	0.00308126	1.71792	5.02747	4.93238	5.68974	15.7592	18.4604	16.9961
WBGene00046523	21ur-4766	IV	15281916	15281936	1	0.974453	-0.266878	8.54669	6.27758	2.84487	2.55555	6.15347	6.37355
WBGene00046524	21ur-823	IV	13945668	13945688	1	0.334599	-0.366196	146.802	124.206	169.981	117.129	111.881	111.891
WBGene00046525	21ur-3001	IV	14683913	14683933	-1	1	-0.00863703	2.51373	1.3452	2.13365	0.851849	1.67822	3.54086
WBGene00046526	21ur-1326	IV	14343120	14343140	1	0.000103571	1.58293	349.912	438.534	783.05	2047.42	1657.52	997.814
WBGene00046527	21ur-4795	IV	14367228	14367248	-1	3.68966e-07	1.18457	55.3021	42.1495	39.1169	93.7034	107.965	111.183
WBGene00046528	21ur-1581	IV	14372539	14372559	1	0.168842	0.349186	158.868	142.142	165.714	190.388	206.98	196.164
WBGene00046529	21ur-1465	IV	16462203	16462223	1	0.952325	0.741527	0.502747	1.3452	2.84487	1.7037	1.11881	4.9572
WBGene00046530	21ur-5175	IV	6075215	6075235	-1	0.100493	2.17739	1.00549	1.79359	0	2.55555	3.35644	8.49806
WBGene00046531	21ur-699	IV	14275852	14275872	1	0.923489	-1.67011	2.51373	0.448399	0	0.851849	0	0
WBGene00046532	21ur-1585	IV	16003007	16003027	1	0.00327497	2.60534	0.502747	0.896797	2.84487	7.66664	7.83169	7.78989
WBGene00046533	21ur-3089	IV	5747179	5747199	-1	1	-0.0173655	1.00549	0.896797	2.13365	0.851849	2.23763	0.708172
WBGene00046534	21ur-807	IV	15866991	15867011	1	0.1918	-0.312532	736.021	674.392	679.212	533.258	560.525	589.907
WBGene00046535	21ur-1127	IV	13826078	13826098	1	0.974453	0.193798	8.04395	5.38078	3.55609	4.68517	6.15347	9.20624
WBGene00046536	21ur-2153	IV	14340303	14340323	-1	0.90672	-0.752806	1.50824	4.03559	5.68974	1.7037	2.79703	2.12452
WBGene00046537	21ur-4574	IV	14604654	14604674	1	0.974453	0.477374	0	1.79359	1.42243	1.27777	1.11881	2.12452
WBGene00046538	21ur-1019	IV	14224018	14224038	-1	0.898853	-0.704144	5.02747	4.03559	0	0.851849	2.23763	2.83269
WBGene00046539	21ur-3381	IV	16367493	16367513	1	0.974453	0.0722105	1901.89	1840.68	2560.38	2884.36	2012.18	1725.82
WBGene00046540	21ur-3819	IV	15410497	15410517	1	0.229181	-0.307301	2966.71	2916.38	3758.78	3010.86	2294.13	2483.56
WBGene00046541	21ur-2417	IV	5803166	5803186	-1	0.834789	-1.00145	4.52472	2.69039	1.42243	0.851849	2.79703	0.708172
WBGene00046542	21ur-4463	IV	14830661	14830681	1	0.974453	0.915508	0	0.896797	0.711217	0.425925	0.559406	2.12452
WBGene00046543	21ur-619	IV	14982801	14982821	-1	0.0017747	-1.37584	38.2087	40.8043	30.5823	11.5	15.104	16.288
WBGene00046544	21ur-1489	IV	15793080	15793100	1	0.976576	-0.543235	1.00549	0.448399	0	0.425925	0.559406	0
WBGene00046545	21ur-10	IV	16888197	16888217	-1	0.342691	-0.394455	161.884	131.381	169.27	113.722	126.985	110.475
WBGene00046546	21ur-583	IV	14560115	14560135	1	0.135515	2.20021	0	2.24199	0	3.4074	2.79703	5.66538
WBGene00046547	21ur-1688	IV	5124603	5124623	-1	0.410112	-0.522269	205.623	181.601	108.816	96.259	98.4555	152.257
WBGene00046548	21ur-2743	IV	14230405	14230425	-1	0.92962	-0.852288	2.51373	2.69039	0.711217	0.851849	1.11881	1.41634
WBGene00046549	21ur-2149	IV	14297081	14297101	1	0.784162	-0.497212	20.1099	13.452	12.8019	4.68517	17.3416	11.3308
WBGene00046550	21ur-4356	IV	14600534	14600554	-1	0.034132	-0.708837	94.0136	75.331	73.2554	59.2035	49.2278	38.9495
WBGene00046551	21ur-2090	IV	13825040	13825060	1	0.864302	0.232266	44.2417	47.5303	65.432	71.1294	55.3812	56.6538
WBGene00046552	21ur-3850	IV	15360777	15360797	1	1	-0.00954831	262.434	259.623	336.406	294.314	266.277	290.351
WBGene00046553	21ur-1368	IV	16023875	16023895	-1	0.27326	-0.721982	26.6456	24.6619	14.9356	9.37034	16.2228	15.5798
WBGene00046554	21ur-1693	IV	16467302	16467322	-1	0.00072118	1.10055	49.7719	65.0178	86.0573	168.666	146.564	111.891
WBGene00046555	21ur-14	IV	16025550	16025570	-1	0.752248	0.182148	208.64	233.616	261.728	238.092	281.381	279.02
WBGene00046556	21ur-3338	IV	13600849	13600869	1	0.974453	0.264785	3.01648	1.79359	2.13365	2.55555	1.67822	4.24903
WBGene00046557	21ur-4736	IV	5594652	5594672	-1	0.689897	1.71474	0	0.896797	0.711217	0.851849	1.67822	2.83269
WBGene00046558	21ur-1746	IV	17210623	17210643	-1	0.881642	-1.4088	0.502747	2.24199	1.42243	0.851849	0	0.708172
WBGene00046559	21ur-4068	IV	6048982	6049002	-1	0.417399	0.988458	3.51923	2.24199	3.55609	5.53702	8.9505	3.54086
WBGene00046560	21ur-2143	IV	15179130	15179150	-1	0.974453	0.731904	0.502747	0.448399	0	0.425925	0.559406	0.708172
WBGene00046561	21ur-3749	IV	15084091	15084111	1	0.413757	-0.969412	12.5687	11.21	8.5346	2.98147	5.59406	8.49806
WBGene00046562	21ur-462	IV	14042459	14042479	-1	0.0324438	-0.76308	106.08	120.619	96.0143	53.2406	69.9258	67.9845
WBGene00046563	21ur-4142	IV	13715593	13715613	-1	0.974453	-0.937224	0.502747	0	0	0	0	0
WBGene00046564	21ur-1600	IV	13646753	13646773	1	0.974453	-1.1597	2.01099	0	0.711217	0	0.559406	0.708172
WBGene00046565	21ur-1195	IV	15268510	15268530	-1	0.0405633	1.38248	3.01648	5.38078	2.84487	10.6481	9.50991	9.91441
WBGene00046566	21ur-3772	IV	14830744	14830764	1	0.924526	2.59677	0	0	0	0	1.11881	0.708172
WBGene00046567	21ur-937	IV	16612113	16612133	-1	0.697107	-0.246619	1335.8	1426.8	1956.56	1695.18	1355.44	923.456
WBGene00046568	21ur-4380	IV	16192625	16192645	-1	0.585719	-0.228286	254.893	219.267	217.632	195.073	190.758	205.37
WBGene00046569	21ur-4805	IV	15309942	15309962	1	0.133702	0.928521	9.04944	13.9004	9.95704	23.4259	15.6634	24.0779
WBGene00046570	21ur-1715	IV	13759730	13759750	-1	0.606714	-1.58991	5.53021	4.03559	3.55609	0.425925	3.91584	0
WBGene00046571	21ur-4610	IV	16104395	16104415	1	1	0.0567175	0.502747	0	0.711217	0	0.559406	0.708172
WBGene00046572	21ur-4027	IV	14862211	14862231	-1	0.142401	0.630758	28.1538	34.0783	44.0955	57.9257	55.3812	49.572
WBGene00046573	21ur-4289	IV	15898909	15898929	-1	0.959526	0.359737	12.0659	18.8327	12.8019	5.53702	29.0891	21.9533
WBGene00046574	21ur-266	IV	15845754	15845774	1	0.570536	2.82233	0	0	0.711217	1.7037	1.67822	0.708172
WBGene00046575	21ur-4086	IV	14364038	14364058	1	0.0981556	-0.502264	157.36	156.94	122.329	90.296	101.812	118.265
WBGene00046576	21ur-680	IV	16164877	16164897	1	0.306423	-0.615388	32.6785	27.3523	24.8926	20.4444	13.9852	21.2452
WBGene00046577	21ur-4193	IV	16211364	16211384	1	0.41625	1.21318	2.01099	0.896797	2.13365	3.83332	3.91584	3.54086
WBGene00046578	21ur-4464	IV	14503331	14503351	1	1	-0.0341212	7.5412	3.13879	2.13365	4.25925	2.79703	5.66538
WBGene00046579	21ur-4014	IV	15137220	15137240	-1	0.974453	-0.104198	24.1318	26.4555	21.3365	21.7222	26.8515	18.4125
WBGene00046580	21ur-4244	IV	15371967	15371987	-1	0.907077	0.962686	1.00549	0.896797	0.711217	0.851849	2.23763	2.12452
WBGene00046581	21ur-1201	IV	16357434	16357454	1	0.976576	0.094889	18.6016	12.1068	27.7375	26.4073	18.4604	16.288
WBGene00046582	21ur-973	IV	14046590	14046610	1	#N/A	#N/A	0	0	0	0	0	0
WBGene00046583	21ur-2809	IV	14745714	14745734	1	0.952325	0.134561	281.035	282.043	258.172	330.943	258.446	312.304
WBGene00046584	21ur-205	IV	14506800	14506820	-1	0.978054	0.0360023	310.697	280.698	394.725	382.906	311.589	313.012
WBGene00046585	21ur-1545	IV	16593501	16593521	1	0.000124139	1.06095	111.107	128.242	142.955	312.629	283.06	198.996
WBGene00046586	21ur-4372	IV	16016527	16016547	-1	0.766791	-0.234834	184.005	182.947	165.714	203.592	143.767	103.393
WBGene00046587	21ur-2040	IV	14561431	14561451	1	0.974453	0.895659	1.00549	0	0	0	0.559406	1.41634
WBGene00046588	21ur-3215	IV	15537031	15537051	1	0.974453	-0.0698957	897.403	869.893	1102.39	1132.11	855.332	742.872
WBGene00046589	21ur-2999	IV	5719805	5719825	1	4.03574e-09	1.92632	54.2966	94.6121	118.062	440.406	323.337	245.736
WBGene00046590	21ur-1663	IV	5605864	5605884	1	0.366495	-1.99616	5.53021	4.48399	2.13365	0	0.559406	2.83269
WBGene00046591	21ur-3157	IV	14183190	14183210	-1	0.00246273	1.6093	4.52472	5.82918	9.24582	22.9999	19.0198	15.5798
WBGene00046592	21ur-2525	IV	15342077	15342097	1	0.000135795	0.96218	45.2472	48.4271	43.3842	90.7219	98.4555	77.8989
WBGene00046593	21ur-4443	IV	14592575	14592595	1	1	0.00880942	16.5906	15.2456	22.0477	19.5925	16.7822	16.9961
WBGene00046594	21ur-3902	IV	15348127	15348147	1	0.88554	-0.172245	158.365	130.932	201.986	177.185	139.292	116.848
WBGene00046595	21ur-4109	IV	6083760	6083780	1	0.93304	2.20442	0.502747	0	0	1.27777	0	1.41634
WBGene00046596	21ur-1412	IV	15122730	15122750	-1	0.137541	-0.417051	386.612	469.922	460.869	274.721	368.089	344.88
WBGene00046597	21ur-1508	IV	15535733	15535753	1	0.957439	-0.848206	1.00549	0.448399	0.711217	0	0	1.41634
WBGene00046598	21ur-2555	IV	16616334	16616354	1	3.64187e-08	1.77334	42.7335	43.0463	48.3628	192.092	177.891	85.6888
WBGene00046599	21ur-4015	IV	16221710	16221730	-1	0.797596	1.52882	0.502747	0.448399	0	2.12962	0	0.708172
WBGene00046600	21ur-4062	IV	15916585	15916605	-1	5.14637e-08	2.35344	4.02197	6.27758	5.68974	28.5369	31.3268	21.2452
WBGene00046601	21ur-397	IV	16831313	16831333	-1	0.995897	-0.0686591	13.5742	12.5552	12.8019	11.074	13.4258	12.7471
WBGene00046602	21ur-2860	IV	16684683	16684703	-1	0.00296665	1.20295	12.5687	8.96797	18.4916	24.2777	34.6832	31.1596
WBGene00046603	21ur-2595	IV	14819461	14819481	1	0.445129	1.73302	1.00549	0.448399	0.711217	0	3.91584	3.54086
WBGene00046604	21ur-2996	IV	5268540	5268560	-1	#N/A	#N/A	0	0	0	0	0	0
WBGene00046605	21ur-4823	IV	14817796	14817816	1	0.808576	0.223394	60.8323	44.8399	58.3198	63.8887	63.2129	63.7355
WBGene00046606	21ur-4329	IV	15314092	15314112	1	0.974453	-0.0953929	144.288	115.238	107.394	97.9627	92.8615	154.382
WBGene00046607	21ur-2944	IV	13906388	13906408	1	0.000431681	-1.02476	734.01	573.502	411.795	243.629	266.837	336.382
WBGene00046608	21ur-2501	IV	6130039	6130059	-1	0.974453	-0.0757258	44.7444	33.6299	30.5823	25.1296	35.802	43.9067
WBGene00046609	21ur-5299	IV	16086370	16086390	-1	0.732193	-0.50376	13.0714	13.9004	12.0907	8.09257	7.83169	12.0389
WBGene00046610	21ur-2995	IV	14122316	14122336	-1	0.000261594	1.21138	16.5906	19.2811	25.6038	44.2962	47.5495	48.8639
WBGene00046611	21ur-2081	IV	5194049	5194069	-1	0.208145	-0.513115	232.269	192.363	152.2	109.037	128.663	168.545
WBGene00046612	21ur-3076	IV	13962739	13962759	-1	1	0.0245637	0	0.448399	0	0	0.559406	0
WBGene00046613	21ur-1430	IV	5566428	5566448	1	0.041648	1.00536	516.321	574.399	1595.97	2164.12	1510.4	1714.48
WBGene00046614	21ur-4150	IV	16818302	16818322	1	0.645106	0.842414	3.51923	2.24199	2.13365	4.25925	4.47525	5.66538
WBGene00046615	21ur-5343	IV	14658508	14658528	-1	0.0223606	1.20323	8.04395	11.21	2.13365	16.1851	15.6634	20.537
WBGene00046616	21ur-2418	IV	15583405	15583425	-1	1	-0.0388553	22.1208	16.1424	15.6468	18.3148	17.901	16.288
WBGene00046617	21ur-3723	IV	14398349	14398369	-1	0.039746	-0.942435	50.7774	34.9751	36.9833	24.7036	15.104	24.0779
WBGene00046618	21ur-3479	IV	14609436	14609456	-1	0.766483	0.591279	5.53021	4.48399	0.711217	7.66664	2.79703	6.37355
WBGene00046619	21ur-3712	IV	15367508	15367528	-1	0.974453	-0.470551	1.50824	1.3452	0.711217	1.27777	0.559406	0.708172
WBGene00046620	21ur-1691	IV	13706619	13706639	-1	0.974453	0.0748453	299.134	296.84	337.828	408.036	285.297	288.226
WBGene00046621	21ur-3543	IV	14312672	14312692	1	1	0.148173	0.502747	1.3452	0.711217	0	1.67822	1.41634
WBGene00046622	21ur-726	IV	14458526	14458546	-1	0.29034	-0.263224	824.504	789.63	952.32	761.553	688.07	686.219
WBGene00046623	21ur-3854	IV	15565137	15565157	-1	0.437188	-0.619879	15.5851	21.5231	15.6468	13.6296	10.6287	9.91441
WBGene00046624	21ur-517	IV	15567476	15567496	-1	0.021852	1.59482	5.02747	3.13879	2.84487	11.5	9.50991	12.7471
WBGene00046625	21ur-728	IV	14138784	14138804	-1	0.781993	0.536996	3.01648	5.38078	4.97852	8.51849	6.15347	4.24903
WBGene00046626	21ur-5397	IV	16113213	16113233	-1	1	0.0138561	258.412	268.591	310.091	336.055	276.906	229.448
WBGene00046627	21ur-2802	IV	14993066	14993086	1	0.974453	0.496618	1.00549	1.3452	0.711217	1.7037	0	2.83269
WBGene00046628	21ur-2353	IV	14482080	14482100	-1	0.974453	-0.120099	9.55218	11.6584	11.3795	7.24072	11.7475	11.3308
WBGene00046629	21ur-2084	IV	14288864	14288884	1	0.809876	-0.740686	12.0659	15.694	4.97852	2.98147	7.83169	9.20624
WBGene00046630	21ur-1825	IV	17052315	17052335	-1	0.640317	0.414146	120.659	189.673	253.904	192.518	342.357	215.992
WBGene00046631	21ur-515	IV	15487158	15487178	-1	0.0557515	1.08243	6.53571	9.41637	8.5346	14.4814	21.2574	16.288
WBGene00046632	21ur-3963	IV	16726444	16726464	-1	0.657621	0.293254	40.2197	38.1139	32.0048	45.9999	45.8713	43.9067
WBGene00046633	21ur-2487	IV	16256895	16256915	-1	0.205369	-0.490416	94.0136	108.512	84.6348	61.3331	73.2822	70.8172
WBGene00046634	21ur-1785	IV	13714108	13714128	1	0.847879	0.926503	2.51373	1.79359	0.711217	1.27777	1.67822	7.08172
WBGene00046635	21ur-5016	IV	5854809	5854829	-1	0.365216	-1.51926	5.53021	4.48399	5.68974	1.7037	1.67822	2.12452
WBGene00046636	21ur-4153	IV	4889933	4889953	-1	0.911947	0.467388	4.02197	5.38078	10.6683	4.25925	10.6287	12.7471
WBGene00046637	21ur-3258	IV	13833653	13833673	1	1	0	0	0	0	0	0	0
WBGene00046638	21ur-833	IV	15296404	15296424	1	6.97794e-06	1.35198	18.6016	21.5231	25.6038	68.1479	52.0248	44.6148
WBGene00046639	21ur-3332	IV	17161772	17161792	-1	0.917233	0.502113	3.01648	7.17438	3.55609	3.83332	5.59406	10.6226
WBGene00046640	21ur-2811	IV	14028400	14028420	-1	0.546115	0.989053	2.01099	3.13879	1.42243	5.1111	3.35644	4.9572
WBGene00046641	21ur-4906	IV	15610508	15610528	-1	0.974453	-0.124088	49.7719	43.9431	47.6515	34.9258	41.9555	53.8211
WBGene00046642	21ur-3382	IV	14459648	14459668	1	0.502613	-0.74925	34.1868	24.6619	11.3795	11.9259	10.0693	20.537
WBGene00046643	21ur-4222	IV	15592988	15593008	1	0.74861	-0.421741	24.1318	17.0391	12.8019	12.7777	15.104	12.7471
WBGene00046644	21ur-2216	IV	14606071	14606091	-1	0.974453	-0.267243	2.51373	2.24199	2.13365	0.851849	2.23763	2.83269
WBGene00046645	21ur-3208	IV	15125779	15125799	-1	0.0201508	1.64368	2.01099	3.13879	2.84487	10.2222	7.27228	7.08172
WBGene00046646	21ur-508	IV	15587310	15587330	-1	5.6649e-06	1.08239	44.2417	35.8719	33.4272	86.0368	81.1139	73.6499
WBGene00046647	21ur-1836	IV	15934779	15934799	1	8.16367e-10	1.65989	25.6401	29.1459	25.6038	109.463	78.8763	64.4437
WBGene00046648	21ur-3389	IV	4849314	4849334	1	1	0	0	0	0	0	0	0
WBGene00046649	21ur-2	IV	16435595	16435615	-1	0.012604	0.868222	44.2417	67.7082	78.2339	115	135.936	94.1869
WBGene00046650	21ur-1925	IV	13955566	13955586	1	0.834775	0.734246	2.51373	3.13879	1.42243	1.7037	5.59406	4.9572
WBGene00046651	21ur-2245	IV	6162942	6162962	1	3.43143e-05	1.24844	38.7115	39.9075	58.3198	138	101.253	81.4398
WBGene00046652	21ur-187	IV	5815839	5815859	1	0.974453	0.659325	1.00549	2.24199	0.711217	2.55555	1.67822	2.12452
WBGene00046653	21ur-3546	IV	15919055	15919075	1	0.974453	-0.173702	11.5632	10.3132	7.11217	8.51849	8.9505	8.49806
WBGene00046654	21ur-3780	IV	6025772	6025792	1	0.996795	0.203906	4.02197	1.79359	0	1.27777	2.79703	2.83269
WBGene00046655	21ur-182	IV	15928268	15928288	1	0.77684	0.384224	11.0604	12.5552	14.9356	12.3518	22.9357	14.8716
WBGene00046656	21ur-1556	IV	5161675	5161695	-1	0.897296	0.196809	32.1758	32.2847	34.8496	42.1665	36.9208	33.9923
WBGene00046657	21ur-3481	IV	14554443	14554463	-1	0.974453	0.165645	14.0769	15.2456	21.3365	17.037	22.9357	16.288
WBGene00046658	21ur-4771	IV	5918874	5918894	1	1	0.0444694	10.0549	13.0036	9.95704	14.9074	8.3911	10.6226
WBGene00046659	21ur-1987	IV	15834128	15834148	-1	0.141042	-1.22112	18.6016	15.694	14.2243	5.96294	7.27228	7.78989
WBGene00046660	21ur-5424	IV	15772780	15772800	1	0.00234254	1.91416	5.02747	3.13879	4.2673	13.6296	16.7822	16.288
WBGene00046661	21ur-4494	IV	15780188	15780208	-1	0.974453	-0.165166	8.54669	9.86477	9.24582	11.074	5.59406	7.78989
WBGene00046662	21ur-4261	IV	16135135	16135155	1	0.979648	0.185491	2.51373	2.24199	1.42243	2.12962	2.23763	2.83269
WBGene00046663	21ur-885	IV	13904779	13904799	1	0.384007	1.83217	0	1.79359	0.711217	4.25925	3.35644	1.41634
WBGene00046664	21ur-1093	IV	16604058	16604078	1	0.974453	0.460165	1.50824	0.896797	2.84487	1.27777	1.67822	4.24903
WBGene00046665	21ur-4620	IV	6066041	6066061	-1	0.00192558	1.6436	4.02197	4.93238	6.40095	14.9074	13.4258	19.1206
WBGene00046666	21ur-4277	IV	16839036	16839056	-1	0.766791	-0.298863	39.2142	58.7402	42.673	30.6666	44.1931	40.3658
WBGene00046667	21ur-3778	IV	17194749	17194769	-1	#N/A	#N/A	0	0	0	0	0	0
WBGene00046668	21ur-4944	IV	13714515	13714535	1	1	-0.0979928	1.00549	0.448399	0	0	0	1.41634
WBGene00046669	21ur-3673	IV	14992863	14992883	1	0.175705	1.29627	4.52472	1.79359	1.42243	6.38887	6.71288	6.37355
WBGene00046670	21ur-5395	IV	16607787	16607807	-1	0.883999	-0.0985258	386.109	407.146	447.355	391.851	405.01	359.751
WBGene00046671	21ur-3566	IV	16051924	16051944	-1	1	0.256468	1.00549	0.448399	0	1.7037	0	0
WBGene00046672	21ur-1252	IV	15549417	15549437	-1	0.974453	0.244513	1.00549	4.03559	1.42243	2.12962	2.23763	3.54086
WBGene00046673	21ur-4099	IV	5600776	5600796	-1	0.221032	-0.670677	31.1703	32.2847	34.1384	18.7407	20.1386	22.6615
WBGene00046674	21ur-3404	IV	17015530	17015550	-1	1	0.0245639	0	0.448399	0	0	0	0.708172
WBGene00046675	21ur-3769	IV	5113614	5113634	1	0.873512	-0.708044	2.51373	4.03559	3.55609	1.7037	1.11881	3.54086
WBGene00046676	21ur-4203	IV	15399073	15399093	-1	0.0018555	1.26827	17.0934	13.452	7.82339	28.111	30.7674	36.1168
WBGene00046677	21ur-2228	IV	16019139	16019159	1	0.811732	-0.907082	7.03845	2.24199	2.84487	2.12962	2.23763	2.12452
WBGene00046678	21ur-4936	IV	14692106	14692126	1	0.131295	1.28848	4.52472	4.48399	1.42243	5.96294	7.83169	13.4553
WBGene00046679	21ur-1316	IV	17049689	17049709	1	0.877078	-0.501243	6.03296	7.62278	7.11217	2.55555	6.71288	5.66538
WBGene00046680	21ur-57	IV	17217670	17217690	-1	0.0900758	0.713288	81.4449	77.573	76.1002	77.5183	128.104	182
WBGene00046681	21ur-4860	IV	14038775	14038795	-1	0.0549016	-0.783332	74.4065	66.363	50.4964	31.5184	33.5644	47.4475
WBGene00046682	21ur-2109	IV	16564215	16564235	-1	0.306827	0.417198	72.3955	69.5018	62.5871	74.1109	84.4704	116.848
WBGene00046683	21ur-3369	IV	16178567	16178587	1	1	0.0245638	0.502747	0	0	0	0.559406	0
WBGene00046684	21ur-797	IV	15795112	15795132	-1	0.822256	-0.260444	43.2362	49.7722	35.5609	30.2406	35.2426	43.1985
WBGene00046685	21ur-2403	IV	5976934	5976954	-1	1	0	0	0	0	0	0	0
WBGene00046686	21ur-1066	IV	16669345	16669365	-1	0.973866	-0.374217	10.0549	9.41637	1.42243	4.25925	3.91584	8.49806
WBGene00046687	21ur-3049	IV	14176971	14176991	-1	0.136215	0.963166	6.03296	8.07118	4.2673	13.2037	9.50991	14.1634
WBGene00046688	21ur-5193	IV	16534326	16534346	-1	0.897296	-0.672842	6.03296	3.58719	4.97852	5.96294	2.79703	0
WBGene00046689	21ur-4331	IV	15345677	15345697	1	0.974453	0.986352	0	0	0	0	0	0.708172
WBGene00046690	21ur-256	IV	16716154	16716174	1	0.781993	-0.538016	14.5797	15.694	11.3795	6.38887	10.0693	12.7471
WBGene00046691	21ur-4654	IV	14417634	14417654	1	0.843701	-0.562294	5.02747	3.58719	4.2673	2.55555	3.35644	2.83269
WBGene00046692	21ur-2123	IV	14713082	14713102	1	0.775269	0.204277	376.557	412.527	561.15	609.072	520.248	422.779
WBGene00046693	21ur-3249	IV	15166094	15166114	1	0.724647	-0.439301	21.6181	17.4875	12.0907	11.074	11.1881	16.288
WBGene00046694	21ur-5138	IV	14620182	14620202	1	0.974453	-0.68646	1.00549	2.69039	0.711217	0.425925	1.67822	0.708172
WBGene00046695	21ur-2096	IV	15090048	15090068	1	0.0341315	-0.619654	76.4175	92.3701	93.1694	62.185	57.6189	49.572
WBGene00046696	21ur-964	IV	16130415	16130435	1	0.613632	1.25707	0.502747	2.69039	0.711217	3.4074	2.79703	3.54086
WBGene00046697	21ur-3410	IV	14273943	14273963	1	0.959526	0.608724	0.502747	0.896797	0.711217	1.27777	0.559406	1.41634
WBGene00046698	21ur-328	IV	16613398	16613418	-1	0.974453	-1.28204	0.502747	0.896797	0	0.425925	0	0
WBGene00046699	21ur-1396	IV	15180209	15180229	1	0.974895	0.308327	2.01099	0	1.42243	2.12962	0.559406	1.41634
WBGene00046700	21ur-1798	IV	16635030	16635050	1	0.630379	0.639871	4.52472	3.58719	4.2673	6.38887	3.91584	9.20624
WBGene00046701	21ur-1171	IV	16747881	16747901	1	0.0973386	3.44006	0.502747	0	0	2.98147	1.11881	2.12452
WBGene00046702	21ur-3424	IV	16381897	16381917	1	0.037737	2.11814	3.01648	1.3452	0.711217	5.96294	7.83169	9.20624
WBGene00046703	21ur-897	IV	15351850	15351870	1	0.00184566	1.11351	26.1428	26.4555	29.1599	63.4628	52.5842	60.1946
WBGene00046704	21ur-666	IV	13945623	13945643	1	0.170171	-1.29595	12.5687	18.3843	11.3795	2.98147	5.03466	9.91441
WBGene00046705	21ur-5045	IV	16540737	16540757	1	0.131564	-1.03643	34.1868	27.3523	23.4702	11.5	13.4258	16.9961
WBGene00046706	21ur-2940	IV	14162140	14162160	1	0.916631	-0.307975	14.0769	19.2811	12.0907	8.94442	16.2228	12.0389
WBGene00046707	21ur-1948	IV	5865880	5865900	-1	0.759331	2.48294	0	0	0	0.425925	0.559406	0.708172
WBGene00046708	21ur-4092	IV	16691068	16691088	-1	0.91114	0.193923	34.6895	37.6655	24.1814	37.4814	35.802	38.2413
WBGene00046709	21ur-2043	IV	14287833	14287853	-1	0.49648	-0.625439	61.3351	45.7367	26.315	19.1666	21.2574	47.4475
WBGene00046710	21ur-1209	IV	15955708	15955728	-1	0.431899	-0.532568	39.717	42.1495	21.3365	20.4444	25.1733	26.9105
WBGene00046711	21ur-3245	IV	15287986	15288006	1	4.78396e-05	1.21474	40.2197	44.3915	51.9188	131.611	102.931	79.3153
WBGene00046712	21ur-1004	IV	6993931	6993951	-1	0.974453	0.986352	0	0	0	0	0.559406	0
WBGene00046713	21ur-5197	IV	14748180	14748200	-1	0.292154	-0.338001	308.686	254.69	269.551	231.277	194.114	233.697
WBGene00046714	21ur-3254	IV	14852554	14852574	1	0.761103	-0.504521	12.0659	10.7616	11.3795	7.66664	6.71288	9.91441
WBGene00046715	21ur-843	IV	17184417	17184437	1	1	0	0	0	0	0	0	0
WBGene00046716	21ur-2016	IV	16041601	16041621	-1	0.993054	-0.036607	434.876	457.815	625.16	627.813	485.565	363.292
WBGene00046717	21ur-4785	IV	15573892	15573912	1	0.974453	-0.0384218	371.53	391.9	357.742	359.48	356.342	376.748
WBGene00046718	21ur-4667	IV	15487292	15487312	-1	0.904757	-0.352712	15.0824	19.2811	8.5346	11.9259	6.71288	15.5798
WBGene00046719	21ur-3472	IV	14441919	14441939	-1	0.57607	1.21406	3.01648	0.448399	0.711217	2.12962	1.67822	6.37355
WBGene00046720	21ur-3217	IV	17190929	17190949	1	0.963216	1.76235	0	0	0	0.425925	0.559406	0
WBGene00046721	21ur-2513	IV	14615349	14615369	1	0.000266205	1.34879	15.5851	14.7972	23.4702	55.7961	45.8713	31.8677
WBGene00046722	21ur-4914	IV	15107123	15107143	-1	0.380694	1.30559	3.51923	2.24199	0	4.68517	6.15347	4.24903
WBGene00046723	21ur-2531	IV	15095301	15095321	1	1	-0.0318943	7.03845	8.07118	2.84487	2.12962	6.15347	9.91441
WBGene00046724	21ur-486	IV	16888988	16889008	-1	0.454031	1.09533	2.01099	2.69039	0.711217	4.68517	4.47525	2.83269
WBGene00046725	21ur-4120	IV	15987662	15987682	1	0.261735	1.66074	2.01099	0.896797	0.711217	6.38887	2.79703	2.12452
WBGene00046726	21ur-2422	IV	13716652	13716672	1	0.264885	-0.376707	82.4504	75.7794	88.9021	63.0368	60.4159	66.5682
WBGene00046727	21ur-3375	IV	15959629	15959649	1	1	-0.0211065	197.077	239.445	208.387	161.425	265.159	210.327
WBGene00046728	21ur-3977	IV	16635235	16635255	1	0.279685	-0.482319	183	139.004	124.463	96.6849	111.881	111.891
WBGene00046729	21ur-3629	IV	13725032	13725052	1	4.12713e-08	1.78502	38.7115	41.7011	54.7637	203.166	166.144	92.0624
WBGene00046730	21ur-224	IV	5861273	5861293	1	0.96546	0.144917	31.673	20.6263	32.716	28.5369	33.005	31.8677
WBGene00046731	21ur-1030	IV	14533350	14533370	1	0.974453	-0.149297	12.0659	9.86477	5.68974	5.96294	8.9505	10.6226
WBGene00046732	21ur-4591	IV	16207023	16207043	-1	2.13886e-06	1.6741	16.5906	15.694	13.5131	65.5924	49.2278	30.4514
WBGene00046733	21ur-372	IV	13646531	13646551	-1	0.332437	-0.58175	44.7444	47.5303	46.2291	29.8147	29.6485	33.2841
WBGene00046734	21ur-298	IV	6381765	6381785	1	1	0	0	0	0	0	0	0
WBGene00046735	21ur-744	IV	15664507	15664527	-1	0.442592	0.292995	325.78	406.249	502.119	554.128	536.471	417.822
WBGene00046736	21ur-3465	IV	6166487	6166507	-1	0.974453	-0.668084	0.502747	0.448399	0.711217	0.425925	0.559406	0
WBGene00046737	21ur-4175	IV	4918437	4918457	1	0.118893	4.05639	0	0	0	0	1.67822	3.54086
WBGene00046738	21ur-2667	IV	15477978	15477998	1	0.0067906	1.66103	4.52472	6.27758	4.97852	13.6296	14.5446	22.6615
WBGene00046739	21ur-2470	IV	14044625	14044645	1	0.959387	0.423781	4.52472	3.13879	1.42243	2.12962	5.59406	4.9572
WBGene00046740	21ur-1447	IV	16052166	16052186	-1	0.612149	0.285933	245.34	279.801	413.928	363.314	447.525	331.425
WBGene00046741	21ur-1887	IV	16818305	16818325	1	0.645106	0.842414	3.51923	2.24199	2.13365	4.25925	4.47525	5.66538
WBGene00046742	21ur-4643	IV	14315942	14315962	1	0.173871	-0.949799	21.6181	17.0391	17.7804	6.81479	8.9505	14.1634
WBGene00046743	21ur-5271	IV	16103522	16103542	1	0.448821	0.656656	12.5687	10.7616	16.358	21.2962	27.4109	12.7471
WBGene00046744	21ur-2411	IV	13624881	13624901	1	0.840415	-0.825806	4.02197	3.58719	4.2673	1.7037	2.23763	2.83269
WBGene00046745	21ur-4974	IV	14104562	14104582	-1	0.738127	-0.201616	877.293	944.776	1044.78	1084.4	785.407	619.651
WBGene00046746	21ur-3293	IV	16035819	16035839	1	0.670081	-1.25144	3.51923	3.13879	2.13365	1.27777	1.67822	0.708172
WBGene00046747	21ur-1263	IV	15271869	15271889	1	0.874581	0.507029	5.53021	6.27758	1.42243	7.66664	7.27228	4.24903
WBGene00046748	21ur-5059	IV	15809339	15809359	-1	6.19095e-12	1.72125	41.728	42.5979	46.9403	189.536	129.782	109.767
WBGene00046749	21ur-3224	IV	14431402	14431422	-1	0.974453	-0.0609536	199.088	200.883	251.771	213.814	222.644	186.957
WBGene00046750	21ur-3604	IV	14750086	14750106	1	0.304821	0.48806	137.753	150.214	123.041	149.074	233.272	195.455
WBGene00046751	21ur-3578	IV	13995193	13995213	1	0.974453	0.986352	0	0	0	0	0	0.708172
WBGene00046752	21ur-4398	IV	15974615	15974635	-1	0.22276	-0.628426	89.4889	67.7082	56.8974	33.2221	42.5149	64.4437
WBGene00046753	21ur-1180	IV	5824387	5824407	-1	0.974453	0.0598525	49.7719	42.5979	37.6945	46.4258	46.9901	42.4903
WBGene00046754	21ur-3657	IV	15569086	15569106	-1	0.795715	-0.160591	169.928	167.701	208.387	162.703	171.738	152.257
WBGene00046755	21ur-4054	IV	15623971	15623991	1	0.567458	-2.52581	1.50824	1.79359	0	0.425925	0	0
WBGene00046756	21ur-114	IV	17203490	17203510	1	0.834775	1.65015	0	0.448399	0	0	0.559406	1.41634
WBGene00046757	21ur-2882	IV	14644034	14644054	1	0.96546	-0.288891	8.04395	6.27758	6.40095	10.2222	4.47525	1.41634
WBGene00046758	21ur-4748	IV	14494642	14494662	1	0.881642	0.129968	526.376	497.274	657.876	743.664	591.293	500.678
WBGene00046759	21ur-531	IV	15334003	15334023	-1	0.974453	0.0914924	281.035	285.182	302.267	340.74	296.485	286.81
WBGene00046760	21ur-2623	IV	16536115	16536135	-1	0.974453	0.0531756	845.62	910.698	1106.65	1300.77	1025.95	640.188
WBGene00046761	21ur-5282	IV	5047836	5047856	-1	0.000181048	1.53269	22.6236	26.4555	28.4487	106.907	72.7228	42.4903
WBGene00046762	21ur-1513	IV	14702666	14702686	-1	1	0.00671384	0.502747	0.896797	0.711217	0.425925	1.67822	0
WBGene00046763	21ur-140	IV	14391426	14391446	1	0.265286	-0.736859	46.7554	44.3915	22.0477	18.3148	22.3763	28.3269
WBGene00046764	21ur-126	IV	5927883	5927903	1	0.974453	0.126613	53.2911	56.4982	96.0143	85.1849	74.4011	62.3191
WBGene00046765	21ur-3337	IV	15542243	15542263	-1	0.821441	0.220343	37.706	44.3915	39.1169	52.3887	38.0396	50.9884
WBGene00046766	21ur-1028	IV	9132124	9132144	-1	0.996107	0.445295	2.01099	0	0	0	0	2.83269
WBGene00046767	21ur-444	IV	15661813	15661833	1	0.0642817	-0.350609	860.199	883.345	867.685	738.553	663.456	644.437
WBGene00046768	21ur-1840	IV	6498732	6498752	1	0.974453	1.90837	0	0	0	0.425925	0	0.708172
WBGene00046769	21ur-3272	IV	16793446	16793466	-1	0.637363	0.254734	86.4724	76.2278	98.1479	130.759	88.9456	88.5215
WBGene00046770	21ur-1651	IV	13906385	13906405	1	0.000431968	-1.02438	734.01	573.053	411.795	243.629	266.837	336.382
WBGene00046771	21ur-2361	IV	15571743	15571763	1	0.781993	-0.215757	392.645	351.545	321.47	224.462	269.074	427.028
WBGene00046772	21ur-1346	IV	14092027	14092047	-1	0.349853	-0.729762	30.1648	27.8007	17.0692	15.3333	10.0693	20.537
WBGene00046773	21ur-453	IV	14998088	14998108	1	0.247261	0.436185	158.868	166.356	200.563	259.388	258.446	191.206
WBGene00046774	21ur-4722	IV	16522053	16522073	1	0.976746	-0.42556	0.502747	0.896797	0	0.425925	0	0.708172
WBGene00046775	21ur-2066	IV	15277255	15277275	-1	0.808604	-0.370426	23.6291	17.4875	14.9356	14.9074	11.1881	17.7043
WBGene00046776	21ur-3653	IV	14575782	14575802	-1	0.990473	-0.678173	0	0.896797	0	0	0.559406	0
WBGene00046777	21ur-189	IV	16178841	16178861	1	0.686184	-0.915251	9.04944	8.07118	3.55609	2.12962	2.23763	7.08172
WBGene00046778	21ur-411	IV	14429515	14429535	1	0.916525	1.7834	0.502747	0	0	1.27777	0	0.708172
WBGene00046779	21ur-4069	IV	15881160	15881180	1	0.387342	0.953747	4.02197	3.58719	2.84487	7.24072	6.15347	7.08172
WBGene00046780	21ur-5224	IV	15106948	15106968	1	0.832396	-0.407063	18.6016	14.3488	14.9356	7.24072	14.5446	14.8716
WBGene00046781	21ur-2614	IV	14244229	14244249	-1	0.179456	1.48984	1.00549	3.13879	2.13365	5.53702	7.27228	4.9572
WBGene00046782	21ur-773	IV	15318201	15318221	-1	0.664874	-0.368975	34.1868	25.1103	28.4487	20.0185	23.4951	24.786
WBGene00046783	21ur-47	IV	14383780	14383800	-1	0.379129	-0.297853	1999.42	2024.52	2558.96	2009.09	1796.25	1546.65
WBGene00046784	21ur-3681	IV	13988049	13988069	1	0.423613	0.280725	108.593	116.135	113.084	123.518	132.579	155.798
WBGene00046785	21ur-664	IV	5970039	5970059	-1	0.897296	1.51594	0.502747	0	0	0.425925	0.559406	0.708172
WBGene00046786	21ur-2992	IV	15240252	15240272	-1	0.473943	2.12569	0.502747	0	0.711217	1.27777	2.79703	0.708172
WBGene00046787	21ur-611	IV	16563807	16563827	-1	0.961372	0.473027	2.01099	1.3452	2.13365	2.55555	2.79703	2.12452
WBGene00046788	21ur-5448	IV	15662930	15662950	1	0.974453	-1.9106	0	0.448399	0.711217	0	0	0
WBGene00046789	21ur-5127	IV	15354975	15354995	-1	0.314172	0.745954	6.53571	7.17438	7.11217	9.79627	9.50991	16.288
WBGene00046790	21ur-2639	IV	15174576	15174596	1	0.860146	-0.137542	397.673	355.58	378.367	368.425	321.099	338.506
WBGene00046791	21ur-3288	IV	16191949	16191969	-1	0.310042	-0.776803	29.1593	26.0071	19.2029	11.074	13.9852	19.1206
WBGene00046792	21ur-1265	IV	15160807	15160827	1	0.0190066	-0.466907	1141.23	1211.12	1147.19	718.535	850.298	965.947
WBGene00046793	21ur-479	IV	14170960	14170980	1	#N/A	#N/A	0	0	0	0	0	0
WBGene00046794	21ur-4270	IV	5872488	5872508	1	#N/A	#N/A	0	0	0	0	0	0
WBGene00046795	21ur-428	IV	16830052	16830072	1	0.974453	-0.14117	273.494	290.562	381.924	120.963	321.659	416.405
WBGene00046796	21ur-2343	IV	14474434	14474454	1	0.822314	0.560635	2.51373	3.58719	3.55609	2.12962	6.15347	6.37355
WBGene00046797	21ur-889	IV	16531098	16531118	1	0.973867	0.848509	0.502747	0.896797	0	1.27777	0	1.41634
WBGene00046798	21ur-3100	IV	13961570	13961590	-1	0.276338	1.3768	2.01099	1.3452	2.84487	5.53702	5.03466	4.9572
WBGene00046799	21ur-4740	IV	16703282	16703302	1	0.736663	-1.09874	6.53571	5.38078	2.13365	0.851849	1.11881	4.9572
WBGene00046800	21ur-2752	IV	15818283	15818303	1	0.630288	0.423186	30.6675	36.7687	39.1169	38.3332	66.01	38.2413
WBGene00046801	21ur-5227	IV	14495919	14495939	1	0.143005	0.455247	271.483	241.687	270.974	471.073	340.679	259.899
WBGene00046802	21ur-4520	IV	5194537	5194557	-1	#N/A	#N/A	0	0	0	0	0	0
WBGene00046803	21ur-5302	IV	5330320	5330340	-1	#N/A	#N/A	0	0	0	0	0	0
WBGene00046804	21ur-3011	IV	5522811	5522831	1	0.452581	1.79882	0	0.896797	1.42243	0.425925	3.91584	3.54086
WBGene00046805	21ur-2703	IV	15978206	15978226	-1	0.895489	0.392001	18.6016	18.8327	7.11217	12.3518	22.3763	24.786
WBGene00046806	21ur-526	IV	6489717	6489737	1	0.974453	0.101577	563.076	615.203	898.267	1072.48	738.416	414.281
WBGene00046807	21ur-369	IV	5481027	5481047	1	0.974453	-0.452536	1.50824	1.3452	2.84487	0	2.79703	1.41634
WBGene00046808	21ur-4826	IV	14965714	14965734	1	4.46064e-05	1.36365	21.1154	23.3167	36.2721	82.6294	71.0446	49.572
WBGene00046809	21ur-306	IV	15425195	15425215	1	#N/A	#N/A	0	0	0	0	0	0
WBGene00046810	21ur-1048	IV	5757986	5758006	-1	0.974453	0.986352	0	0	0	0	0.559406	0
WBGene00046811	21ur-2687	IV	16250693	16250713	-1	0.530329	-0.588433	35.695	22.8683	21.3365	12.7777	15.104	26.2024
WBGene00046812	21ur-4994	IV	16274867	16274887	1	1	0.0158202	117.14	106.27	105.26	120.963	101.253	109.767
WBGene00046813	21ur-591	IV	15302717	15302737	1	0.621683	-0.796997	19.6071	14.7972	6.40095	6.81479	4.47525	12.7471
WBGene00046814	21ur-2282	IV	15542639	15542659	-1	1	0.0245637	0	0.448399	0	0	0	0.708172
WBGene00046815	21ur-2662	IV	14321652	14321672	1	0.974453	0.0736442	276.008	317.915	415.351	423.795	355.782	279.02
WBGene00046816	21ur-3571	IV	14132514	14132534	1	0.808159	-0.330658	28.1538	34.9751	22.0477	21.2962	19.0198	28.3269
WBGene00046817	21ur-2192	IV	15219426	15219446	-1	0.330924	-0.339138	146.802	143.488	154.334	138	100.134	111.891
WBGene00046818	21ur-1864	IV	16252791	16252811	1	0.858849	2.48908	0	0	0	0.425925	0.559406	0.708172
WBGene00046819	21ur-2490	IV	15279422	15279442	1	0.985296	-0.128563	4.52472	2.24199	5.68974	4.25925	3.91584	2.83269
WBGene00046820	21ur-5207	IV	15875293	15875313	1	0.215067	-0.349922	322.763	277.559	312.224	250.444	213.134	252.109
WBGene00046821	21ur-2640	IV	16461070	16461090	-1	0.882113	1.898	0	0	0	0	1.11881	0
WBGene00046822	21ur-4727	IV	16625590	16625610	1	0.743874	0.206701	231.263	215.231	331.427	343.721	256.768	293.891
WBGene00046823	21ur-3237	IV	14638070	14638090	1	0.604677	1.41826	1.50824	1.3452	0	0.851849	3.91584	3.54086
WBGene00046824	21ur-2423	IV	14805483	14805503	1	0.44566	-0.3584	99.0411	92.3701	79.6563	60.0554	65.4506	87.8133
WBGene00046825	21ur-1590	IV	15363959	15363979	1	0.221061	-0.407652	135.239	114.79	108.105	86.0368	83.911	101.269
WBGene00046826	21ur-3729	IV	14433171	14433191	-1	0.0968978	-0.557249	256.401	223.303	161.446	123.944	139.852	174.21
WBGene00046827	21ur-3452	IV	16794723	16794743	1	0.482961	-0.1921	567.098	516.555	495.718	428.906	449.203	507.051
WBGene00046828	21ur-578	IV	16786607	16786627	1	1.73142e-05	1.45404	14.0769	13.0036	16.358	45.148	35.2426	36.8249
WBGene00046829	21ur-4186	IV	5337359	5337379	-1	0.957439	0.141545	203.612	186.534	265.284	276.851	255.649	188.374
WBGene00046830	21ur-3732	IV	15536062	15536082	1	0.00192686	-1.03928	172.442	142.591	115.928	60.9072	67.1288	82.8561
WBGene00046831	21ur-1873	IV	14716806	14716826	-1	0.0100478	1.91042	3.51923	3.58719	2.84487	12.3518	20.698	4.24903
WBGene00046832	21ur-534	IV	16005042	16005062	1	0.968966	2.05792	0	0	0	0	0.559406	0.708172
WBGene00046833	21ur-3984	IV	13646547	13646567	1	0.993677	0.21888	1.00549	1.3452	0	2.12962	0.559406	0
WBGene00046834	21ur-2702	IV	14921635	14921655	1	0.978498	-0.279785	1.50824	0.448399	0.711217	0.851849	0	1.41634
WBGene00046835	21ur-3169	IV	15714592	15714612	-1	0.683593	-1.70268	2.01099	2.69039	1.42243	1.7037	0	0
WBGene00046836	21ur-794	IV	15561773	15561793	-1	0.0134365	0.800787	37.706	26.9039	26.315	50.2591	52.5842	56.6538
WBGene00046837	21ur-2132	IV	15392573	15392593	-1	1	0.0208037	443.925	415.666	576.086	573.72	470.461	408.615
WBGene00046838	21ur-1000	IV	14721565	14721585	-1	0.324381	0.402489	127.698	121.068	132.286	205.722	171.738	123.93
WBGene00046839	21ur-3284	IV	15350531	15350551	1	0.974453	-0.346548	6.53571	4.93238	4.97852	2.12962	2.79703	8.49806
WBGene00046840	21ur-4542	IV	4956233	4956253	-1	1	0.0245637	0	0.448399	0	0.425925	0	0
WBGene00046841	21ur-1860	IV	5565661	5565681	-1	7.87567e-16	1.60769	90.9971	78.4698	106.683	330.092	261.802	242.903
WBGene00046842	21ur-3354	IV	14485452	14485472	1	1	-0.109282	3.01648	2.69039	0.711217	0	3.35644	2.83269
WBGene00046843	21ur-2968	IV	5440347	5440367	-1	0.974453	-0.305617	3.51923	7.62278	2.84487	4.25925	1.67822	5.66538
WBGene00046844	21ur-2024	IV	15711614	15711634	-1	0.198009	-1.1589	17.0934	16.5907	14.9356	5.96294	5.59406	10.6226
WBGene00046845	21ur-3897	IV	15616639	15616659	-1	1	0.00365747	481.128	425.082	534.124	486.832	445.288	510.592
WBGene00046846	21ur-423	IV	16099705	16099725	-1	0.974453	-0.123229	60.3296	42.1495	44.8067	39.1851	43.6337	53.1129
WBGene00046847	21ur-3887	IV	14405014	14405034	1	0.668486	-0.73548	13.5742	10.3132	4.2673	5.53702	7.27228	4.24903
WBGene00046848	21ur-68	IV	15183020	15183040	-1	3.99337e-06	1.41102	194.563	195.502	230.434	733.016	550.456	363.292
WBGene00046849	21ur-273	IV	5802348	5802368	-1	0.974453	0.986352	0	0	0	0.425925	0	0
WBGene00046850	21ur-3740	IV	6078416	6078436	1	0.168062	-0.335311	279.527	282.94	285.198	240.647	214.253	215.992
WBGene00046851	21ur-1919	IV	16194036	16194056	-1	0.974453	-0.100312	51.7829	46.1851	66.1432	58.3517	43.0743	50.2802
WBGene00046852	21ur-4705	IV	6444658	6444678	-1	0.590302	0.709434	7.03845	3.13879	3.55609	6.38887	7.27228	9.20624
WBGene00046853	21ur-2934	IV	13948777	13948797	-1	0.347255	-0.264631	2550.43	2581.43	3003.47	2302.12	2402.65	2065.03
WBGene00046854	21ur-1164	IV	15817413	15817433	-1	0.895489	-2.0116	1.00549	1.3452	0	0	0	0.708172
WBGene00046855	21ur-2296	IV	14874511	14874531	-1	0.780574	1.39643	1.00549	0	0.711217	1.27777	1.67822	1.41634
WBGene00046856	21ur-4592	IV	14512325	14512345	1	0.468869	2.83171	0	0	0	0.851849	0.559406	0.708172
WBGene00046857	21ur-2680	IV	14716285	14716305	1	0.936132	-1.0759	0.502747	0	2.84487	0.851849	0.559406	0
WBGene00046858	21ur-628	IV	14690413	14690433	-1	0.798914	0.248341	720.436	926.84	1156.44	1282.88	1283.84	761.285
WBGene00046859	21ur-4615	IV	13877232	13877252	-1	0.795715	-0.171332	146.299	143.039	148.644	100.944	146.564	143.051
WBGene00046860	21ur-4388	IV	16364994	16365014	1	0.000143415	1.419	13.5742	15.694	16.358	52.3887	34.1238	33.9923
WBGene00046861	21ur-40	IV	15487971	15487991	-1	0.974453	0.117894	16.5906	15.694	17.7804	19.5925	18.4604	15.5798
WBGene00046862	21ur-2875	IV	15362983	15363003	-1	0.953862	-0.119108	394.656	463.196	591.733	487.258	462.07	383.121
WBGene00046863	21ur-1844	IV	15396239	15396259	1	0.795896	-0.871628	6.53571	4.93238	2.84487	2.12962	1.67822	4.24903
WBGene00046864	21ur-5052	IV	15845751	15845771	1	0.570536	2.82233	0	0	0.711217	1.7037	1.67822	0.708172
WBGene00046865	21ur-999	IV	16213863	16213883	1	0.828207	-0.233327	121.162	111.651	82.5012	64.7405	86.1486	119.681
WBGene00046866	21ur-1235	IV	5888787	5888807	-1	1	-0.0293672	37.706	31.8363	25.6038	36.6295	26.2921	30.4514
WBGene00046867	21ur-408	IV	14848763	14848783	-1	0.903259	2.79986	0	0	0	0	0	2.12452
WBGene00046868	21ur-3027	IV	14176647	14176667	1	1.73982e-05	1.29554	29.662	28.2491	44.8067	96.259	86.1486	65.1518
WBGene00046869	21ur-2938	IV	5797001	5797021	-1	1	0.30914	2.01099	0	0	0.425925	0	2.12452
WBGene00046870	21ur-2236	IV	5592162	5592182	-1	0.776659	0.747297	5.53021	5.38078	0.711217	4.68517	7.83169	7.78989
WBGene00046871	21ur-2658	IV	16884222	16884242	-1	0.974453	0.986352	0	0	0	0	0	0.708172
WBGene00046872	21ur-4739	IV	15899893	15899913	1	0.957439	0.231088	40.2197	21.0747	20.6253	25.5555	29.6485	41.7822
WBGene00046873	21ur-3952	IV	17034816	17034836	-1	0.828161	-0.756798	3.51923	3.13879	4.97852	2.12962	4.47525	0
WBGene00046874	21ur-3492	IV	15216338	15216358	-1	0.135605	-1.37953	17.5961	13.9004	9.95704	2.55555	6.15347	7.78989
WBGene00046875	21ur-103	IV	4835169	4835189	1	0.974453	-0.1168	193.055	182.498	157.89	126.074	122.51	245.736
WBGene00046876	21ur-3941	IV	16077023	16077043	1	1	0.0322736	27.1483	18.3843	22.0477	20.8703	22.3763	26.2024
WBGene00046877	21ur-1673	IV	14997272	14997292	-1	0.732739	0.333104	15.5851	13.9004	15.6468	14.9074	21.8169	20.537
WBGene00046878	21ur-1225	IV	16260008	16260028	-1	0.905076	-0.189293	48.2637	69.9502	46.2291	42.5925	56.5	46.0312
WBGene00046879	21ur-2172	IV	14885188	14885208	1	3.99391e-07	1.30537	34.6895	32.7331	32.716	94.5553	81.6733	70.109
WBGene00046880	21ur-5054	IV	15267023	15267043	1	0.827457	-0.305743	32.6785	26.4555	19.2029	19.1666	22.9357	21.9533
WBGene00046881	21ur-969	IV	14048154	14048174	-1	0.836704	0.137613	420.296	424.633	562.573	540.072	530.317	474.475
WBGene00046882	21ur-5234	IV	15614141	15614161	-1	0.957439	0.307108	6.03296	4.93238	4.2673	4.25925	7.27228	7.78989
WBGene00046883	21ur-1135	IV	14707515	14707535	-1	0.0306834	-1.57759	17.5961	12.5552	11.3795	2.98147	5.03466	6.37355
WBGene00046884	21ur-1681	IV	14412658	14412678	-1	0.000604773	1.19619	55.8049	69.0534	75.389	188.685	158.871	109.058
WBGene00046885	21ur-2292	IV	15703316	15703336	1	0.721637	-0.238969	524.867	542.562	603.823	610.776	486.684	315.845
WBGene00046886	21ur-2427	IV	5600999	5601019	1	0.974453	-0.937224	0	0.448399	0	0	0	0
WBGene00046887	21ur-2678	IV	14685608	14685628	1	0.760765	-0.521605	17.0934	21.0747	9.95704	5.96294	16.2228	12.0389
WBGene00046888	21ur-1342	IV	13989627	13989647	1	0.372999	-0.476405	56.3076	57.8434	37.6945	38.7591	30.2079	41.074
WBGene00046889	21ur-215	IV	15072828	15072848	-1	0.974453	0.143182	24.6346	28.6975	18.4916	33.2221	26.8515	19.1206
WBGene00046890	21ur-5250	IV	14852193	14852213	-1	#N/A	#N/A	0	0	0	0	0	0
WBGene00046891	21ur-5089	IV	16908390	16908410	1	0.0435152	0.932425	18.6016	16.5907	15.6468	34.074	21.2574	42.4903
WBGene00046892	21ur-4249	IV	15985969	15985989	1	7.42108e-05	1.37754	23.1263	20.1779	25.6038	63.8887	69.9258	43.1985
WBGene00046893	21ur-2160	IV	15308805	15308825	-1	0.57607	-1.11036	3.51923	8.51957	5.68974	2.98147	1.11881	4.24903
WBGene00046894	21ur-2831	IV	14031540	14031560	-1	0.0294178	1.27037	4.52472	8.07118	13.5131	16.6111	22.9357	21.9533
WBGene00046895	21ur-4302	IV	5956169	5956189	-1	0.840722	0.171278	1061.8	1199.91	1673.49	1659.83	1467.88	1300.2
WBGene00046896	21ur-870	IV	6993583	6993603	-1	0.974453	0.802256	0	0.448399	0	0.425925	0.559406	0
WBGene00046897	21ur-2262	IV	6164139	6164159	-1	0.182267	1.58248	2.01099	2.24199	3.55609	10.2222	10.0693	2.12452
WBGene00046898	21ur-4987	IV	16014564	16014584	-1	0.107818	-0.50176	93.5109	86.0925	103.126	67.2961	63.2129	68.6927
WBGene00046899	21ur-1070	IV	15568697	15568717	-1	0.0195772	1.39215	5.02747	9.86477	7.11217	22.9999	21.8169	12.7471
WBGene00046900	21ur-235	IV	16980480	16980500	-1	0.365698	-0.554335	112.112	115.687	94.5919	60.9072	71.0446	88.5215
WBGene00046901	21ur-3612	IV	14867071	14867091	1	0.957439	-0.598598	2.51373	0.896797	1.42243	0.851849	2.23763	0
WBGene00046902	21ur-1689	IV	16093040	16093060	-1	0.365471	-0.4959	225.733	198.192	187.05	118.833	142.649	172.794
WBGene00046903	21ur-1292	IV	16617145	16617165	1	7.53084e-08	1.26613	76.4175	88.3345	106.683	244.907	229.357	174.21
WBGene00046904	21ur-3828	IV	5766033	5766053	-1	0.111555	0.885174	11.0604	8.51957	5.68974	16.1851	14.5446	16.9961
WBGene00046905	21ur-1397	IV	15180636	15180656	1	0.239171	0.989045	9.55218	5.82918	3.55609	11.5	12.8663	14.1634
WBGene00046906	21ur-4851	IV	13694512	13694532	-1	0.0980439	-1.13299	19.6071	18.8327	14.9356	8.51849	6.15347	9.91441
WBGene00046907	21ur-3868	IV	5578593	5578613	-1	0.974453	-0.387502	4.52472	4.93238	2.13365	2.98147	4.47525	1.41634
WBGene00046908	21ur-5174	IV	15126422	15126442	1	0.470902	0.390026	31.1703	36.7687	44.8067	46.4258	54.2624	46.0312
WBGene00046909	21ur-175	IV	14381738	14381758	1	0.622341	0.778225	2.01099	4.03559	1.42243	5.1111	3.91584	4.24903
WBGene00046910	21ur-557	IV	14053460	14053480	-1	0.682651	-0.215978	178.978	177.566	193.451	196.777	152.718	121.097
WBGene00046911	21ur-4274	IV	14928047	14928067	1	0.000422504	1.21842	24.6346	25.1103	32.0048	69.4257	64.8911	53.8211
WBGene00046912	21ur-582	IV	16040612	16040632	-1	0.974453	0.162017	4.52472	4.48399	5.68974	2.98147	7.27228	6.37355
WBGene00046913	21ur-725	IV	16789550	16789570	1	1	-0.105434	0	0	1.42243	0	0.559406	0.708172
WBGene00046914	21ur-821	IV	16120310	16120330	-1	0.880634	0.859768	3.51923	1.79359	0	3.4074	1.67822	4.9572
WBGene00046915	21ur-2420	IV	14816894	14816914	-1	0.974453	-0.15086	10.0549	15.694	9.95704	8.09257	11.1881	13.4553
WBGene00046916	21ur-1505	IV	15279790	15279810	1	0.824981	-1.89355	1.50824	2.24199	0	0.425925	0.559406	0
WBGene00046917	21ur-4569	IV	16662196	16662216	-1	0.547054	-0.548325	22.6236	28.2491	16.358	11.9259	14.5446	20.537
WBGene00046918	21ur-1099	IV	15679229	15679249	1	0.645212	-0.509771	19.6071	17.0391	26.315	9.79627	12.3069	22.6615
WBGene00046919	21ur-2395	IV	14868451	14868471	-1	0.0712048	-0.918507	110.604	116.135	105.971	34.4999	50.3466	92.7705
WBGene00046920	21ur-603	IV	16541430	16541450	-1	0.607192	0.28592	2149.74	2054.56	2954.4	3758.36	2713.68	2251.99
WBGene00046921	21ur-2645	IV	16789244	16789264	1	0.974453	-0.937224	0	0	0.711217	0	0	0
WBGene00046922	21ur-1477	IV	14036297	14036317	-1	0.944878	0.164578	23.6291	24.2135	14.9356	29.3888	20.698	20.537
WBGene00046923	21ur-4292	IV	13818023	13818043	1	0.0877749	0.731434	67.368	97.7509	113.795	154.185	181.248	126.055
WBGene00046924	21ur-358	IV	14908543	14908563	-1	0.0340897	1.40471	11.0604	7.62278	2.13365	23.8518	18.4604	14.1634
WBGene00046925	21ur-1462	IV	16115543	16115563	1	0.182267	-0.717083	37.706	39.9075	31.2935	17.4629	23.4951	26.2024
WBGene00046926	21ur-4407	IV	13873770	13873790	-1	0.872509	0.537719	3.01648	3.58719	3.55609	8.09257	3.35644	2.83269
WBGene00046927	21ur-3260	IV	14979888	14979908	1	0.236576	-0.366163	471.576	402.662	482.916	420.813	347.391	281.852
WBGene00046928	21ur-2154	IV	14695984	14696004	1	0.828207	-0.930837	3.51923	6.72598	1.42243	1.7037	1.11881	3.54086
WBGene00046929	21ur-4576	IV	16605152	16605172	-1	0.530005	-0.728366	12.5687	10.3132	8.5346	6.38887	5.03466	7.78989
WBGene00046930	21ur-1751	IV	16196100	16196120	-1	0.0951299	1.13188	7.03845	7.17438	9.24582	25.1296	16.2228	8.49806
WBGene00046931	21ur-3195	IV	15788295	15788315	1	7.53084e-08	1.55182	37.2032	53.3594	60.4534	178.036	144.327	116.848
WBGene00046932	21ur-2928	IV	16205483	16205503	1	0.150563	1.1001	3.01648	5.82918	4.97852	7.66664	12.3069	9.91441
WBGene00046933	21ur-3607	IV	5430087	5430107	1	0.808356	-0.460029	10.5577	15.694	12.8019	10.6481	7.83169	9.91441
WBGene00046934	21ur-5178	IV	16129948	16129968	-1	0.959526	-0.560745	4.52472	3.13879	2.13365	1.27777	3.35644	2.12452
WBGene00046935	21ur-3088	IV	14730360	14730380	-1	0.974453	-0.937224	0	0.448399	0	0	0	0
WBGene00046936	21ur-169	IV	14177689	14177709	-1	0.872302	-0.712768	8.04395	5.38078	2.84487	1.7037	2.23763	6.37355
WBGene00046937	21ur-4751	IV	6389520	6389540	-1	0.876254	1.34021	0.502747	0.448399	0	1.27777	0.559406	0.708172
WBGene00046938	21ur-2126	IV	16528011	16528031	-1	0.780574	0.486266	7.03845	11.6584	6.40095	13.2037	12.3069	9.91441
WBGene00046939	21ur-4834	IV	15743682	15743702	1	0.626462	0.334524	910.474	882.897	1374.78	1869.38	1352.64	769.075
WBGene00046940	21ur-2538	IV	15536065	15536085	1	0.00192173	-1.04095	172.945	142.591	115.928	60.9072	67.1288	82.8561
WBGene00046941	21ur-3572	IV	13758483	13758503	-1	0.455785	0.458657	12.5687	20.6263	17.7804	20.8703	22.9357	26.9105
WBGene00046942	21ur-1910	IV	14982276	14982296	1	0.629597	0.278336	112.112	86.9893	142.955	139.277	144.327	128.887
WBGene00046943	21ur-750	IV	14486519	14486539	1	0.974453	-0.546163	3.51923	1.3452	2.84487	1.27777	0.559406	3.54086
WBGene00046944	21ur-1483	IV	14704386	14704406	-1	0.245309	-0.63513	111.107	98.1993	53.3413	40.0369	53.1436	77.8989
WBGene00046945	21ur-4452	IV	16006060	16006080	-1	0.762842	0.666584	3.01648	4.48399	1.42243	2.98147	5.03466	7.08172
WBGene00046946	21ur-2756	IV	13712624	13712644	1	0.974453	-0.570243	2.51373	2.69039	0	1.7037	1.11881	0.708172
WBGene00046947	21ur-3940	IV	16026135	16026155	-1	0.959526	0.0810522	235.285	236.754	257.461	286.221	244.461	238.654
WBGene00046948	21ur-2252	IV	15604944	15604964	-1	0.239171	-0.602768	80.9422	65.4662	42.673	33.2221	42.5149	50.2802
WBGene00046949	21ur-1102	IV	14737763	14737783	1	0.825029	-0.587966	8.04395	9.41637	5.68974	2.12962	6.71288	7.08172
WBGene00046950	21ur-1993	IV	5482674	5482694	1	1	0	0	0	0	0	0	0
WBGene00046951	21ur-762	IV	6196117	6196137	1	0.00729702	0.616401	59.8268	71.2954	73.9666	106.055	93.9803	114.016
WBGene00046952	21ur-3936	IV	16691442	16691462	1	0.974453	-0.590721	3.01648	1.3452	0.711217	0.425925	1.67822	1.41634
WBGene00046953	21ur-1484	IV	14886425	14886445	-1	0.773738	0.455843	8.54669	10.3132	14.9356	17.8888	9.50991	18.4125
WBGene00046954	21ur-4524	IV	14565961	14565981	-1	0.738745	1.20622	1.50824	1.3452	0	1.27777	1.67822	4.24903
WBGene00046955	21ur-5105	IV	13954115	13954135	1	0.816567	-0.161118	1497.18	1581.5	2024.83	1734.36	1587.04	1239.3
WBGene00046956	21ur-260	IV	14856368	14856388	1	0.923489	-0.335019	14.0769	13.452	12.0907	8.51849	7.83169	15.5798
WBGene00046957	21ur-4680	IV	13819066	13819086	1	0.974453	0.0775232	128.2	124.206	97.4367	113.296	106.287	152.257
WBGene00046958	21ur-3108	IV	5784988	5785008	1	0.376224	0.410367	30.6675	34.9751	39.1169	57.9257	40.2773	38.9495
WBGene00046959	21ur-607	IV	15099164	15099184	-1	0.974453	0.0856947	122.67	100.89	145.088	140.981	125.866	122.514
WBGene00046960	21ur-3816	IV	16150815	16150835	-1	0.98946	-0.0572775	32.1758	25.5587	23.4702	25.9814	20.1386	32.5759
WBGene00046961	21ur-1564	IV	13721461	13721481	-1	0.547054	0.497313	17.5961	11.6584	15.6468	17.4629	20.698	25.4942
WBGene00046962	21ur-2611	IV	14412346	14412366	-1	0.974453	1.90837	0	0	0	0.425925	0	0.708172
WBGene00046963	21ur-1367	IV	16891847	16891867	-1	1	0.00430675	108.091	86.0925	91.747	94.9812	83.3516	109.058
WBGene00046964	21ur-2086	IV	15625722	15625742	1	0.974453	0.156405	38.2087	39.0107	29.1599	29.3888	49.7872	40.3658
WBGene00046965	21ur-3665	IV	14609030	14609050	1	0.406224	1.62699	1.50824	1.3452	0	2.12962	3.91584	3.54086
WBGene00046966	21ur-4063	IV	15960756	15960776	-1	0.00176134	1.65009	5.02747	5.82918	7.82339	22.1481	20.698	14.1634
WBGene00046967	21ur-1466	IV	14227013	14227033	1	0.974453	0.109002	198.082	205.367	253.904	280.258	245.579	180.584
WBGene00046968	21ur-201	IV	16024537	16024557	-1	0.941851	0.604367	0.502747	3.58719	2.84487	2.98147	3.35644	4.24903
WBGene00046969	21ur-868	IV	14662649	14662669	-1	1	0.0518155	2.01099	2.69039	0	1.27777	0.559406	3.54086
WBGene00046970	21ur-1899	IV	15397446	15397466	1	0.387695	-0.851708	19.1044	15.2456	14.2243	5.53702	7.27228	14.8716
WBGene00046971	21ur-452	IV	15786745	15786765	1	0.476498	-0.240415	396.164	336.299	368.41	303.258	312.149	316.553
WBGene00046972	21ur-3094	IV	13920645	13920665	-1	0.131258	2.23225	2.01099	0.448399	0.711217	6.81479	4.47525	3.54086
WBGene00046973	21ur-1682	IV	15613706	15613726	-1	0.934091	-0.383656	7.5412	5.38078	3.55609	5.1111	3.35644	4.24903
WBGene00046974	21ur-469	IV	14571278	14571298	-1	0.881267	-0.750444	8.54669	3.13879	4.2673	0.851849	3.91584	4.9572
WBGene00046975	21ur-4501	IV	16554058	16554078	1	0.974453	-0.259047	11.5632	6.72598	4.2673	3.83332	8.3911	7.08172
WBGene00046976	21ur-1400	IV	15422381	15422401	1	0.0312684	0.527761	71.39	70.3986	71.1217	95.4071	104.609	107.642
WBGene00046977	21ur-698	IV	16054337	16054357	1	0.931748	-0.477918	5.02747	7.17438	5.68974	2.12962	3.35644	7.78989
WBGene00046978	21ur-75	IV	14813729	14813749	1	0.00994986	0.957377	21.6181	20.1779	19.2029	53.6665	29.0891	34.7004
WBGene00046979	21ur-1522	IV	14914002	14914022	-1	0.827684	-0.632606	11.5632	11.21	8.5346	6.38887	2.79703	11.3308
WBGene00046980	21ur-1619	IV	16247111	16247131	-1	0.0564689	-1.12431	57.8159	52.0142	23.4702	14.9074	19.0198	28.3269
WBGene00046981	21ur-3003	IV	5829425	5829445	-1	0.968966	0.208844	28.6566	25.5587	40.5394	38.3332	41.9555	28.3269
WBGene00046982	21ur-5339	IV	16673604	16673624	-1	0.531729	3.02935	0	0	0	0.425925	0	2.12452
WBGene00046983	21ur-4353	IV	14887960	14887980	-1	0.876254	0.949406	0.502747	0.448399	2.13365	0.851849	3.35644	1.41634
WBGene00046984	21ur-3121	IV	16727323	16727343	1	0.974453	-0.360159	2.01099	2.24199	1.42243	0.851849	2.23763	1.41634
WBGene00046985	21ur-1176	IV	15425349	15425369	-1	0.253232	1.41119	2.01099	3.58719	0.711217	6.81479	4.47525	6.37355
WBGene00046986	21ur-2685	IV	15541081	15541101	-1	0.528067	-0.557725	23.1263	22.8683	20.6253	10.2222	17.3416	18.4125
WBGene00046987	21ur-1312	IV	16550925	16550945	1	0.000375759	1.44367	9.55218	12.1068	7.11217	29.3888	23.4951	26.9105
WBGene00046988	21ur-4190	IV	15777865	15777885	1	1.95351e-05	1.85466	7.5412	5.82918	9.24582	24.2777	21.2574	35.4086
WBGene00046989	21ur-3349	IV	13625974	13625994	-1	0.379958	-0.596444	45.7499	52.0142	28.4487	23.8518	27.4109	33.2841
WBGene00046990	21ur-5236	IV	15976781	15976801	-1	0.65746	-0.369478	32.1758	34.5267	27.7375	21.7222	21.2574	31.1596
WBGene00046991	21ur-2787	IV	15848479	15848499	1	0.939075	-1.47034	0.502747	0.448399	0.711217	0	0.559406	0
WBGene00046992	21ur-3586	IV	16555049	16555069	1	#N/A	#N/A	0	0	0	0	0	0
WBGene00046993	21ur-5144	IV	16006585	16006605	-1	0.0100478	1.05452	17.5961	10.3132	16.358	36.2036	29.0891	24.786
WBGene00046994	21ur-2977	IV	13824087	13824107	1	0.219679	1.24293	2.51373	2.24199	3.55609	8.51849	7.27228	2.83269
WBGene00046995	21ur-3473	IV	14486992	14487012	1	1	-0.0147591	34.6895	17.9359	24.1814	23.4259	25.1733	27.6187
WBGene00046996	21ur-52	IV	16902981	16903001	1	1.81511e-07	1.37468	46.2527	45.2883	43.3842	120.537	116.916	112.599
WBGene00046997	21ur-153	IV	16163472	16163492	1	0.0128358	0.995197	22.6236	27.8007	37.6945	78.796	55.3812	38.2413
WBGene00046998	21ur-4466	IV	16543448	16543468	1	0.0498815	1.03716	17.0934	15.694	13.5131	30.2406	34.1238	31.1596
WBGene00046999	21ur-2828	IV	16878859	16878879	1	0.891826	0.487433	4.52472	5.38078	2.13365	3.83332	7.27228	6.37355
WBGene00047000	21ur-5259	IV	13731968	13731988	-1	0.358596	-0.848517	19.1044	23.7651	8.5346	8.51849	10.6287	9.91441
WBGene00047001	21ur-681	IV	14179762	14179782	1	0.0355918	1.56091	3.01648	2.24199	3.55609	8.09257	9.50991	7.78989
WBGene00047002	21ur-1450	IV	15087584	15087604	-1	0.827619	0.504586	3.01648	4.48399	2.84487	3.4074	6.15347	5.66538
WBGene00047003	21ur-988	IV	14961570	14961590	1	0.974453	1.03702	0	0.448399	0	0	0.559406	0.708172
WBGene00047004	21ur-2567	IV	6031396	6031416	-1	0.967882	-0.115332	96.0246	74.8826	99.5704	80.0738	86.1486	82.8561
WBGene00047005	21ur-571	IV	14568057	14568077	1	0.008732	1.14702	12.0659	12.5552	10.6683	20.4444	28.5297	30.4514
WBGene00047006	21ur-3783	IV	16689910	16689930	1	0.00429867	1.34847	9.55218	8.51957	9.24582	29.3888	20.1386	19.1206
WBGene00047007	21ur-284	IV	14274094	14274114	1	0.102271	-0.603769	81.9477	79.815	73.2554	43.4443	47.5495	65.1518
WBGene00047008	21ur-2358	IV	14190706	14190726	1	0.0437524	2.88617	0.502747	0.448399	0.711217	2.12962	4.47525	5.66538
WBGene00047009	21ur-24	IV	14306368	14306388	1	1	-0.00400021	22.1208	14.7972	18.4916	10.6481	17.901	27.6187
WBGene00047010	21ur-3593	IV	15341421	15341441	-1	0.704702	1.98325	0	0	0.711217	0	1.67822	0.708172
WBGene00047011	21ur-4337	IV	14296454	14296474	-1	0.00584041	2.04024	3.01648	2.69039	4.2673	12.7777	7.27228	20.537
WBGene00047012	21ur-5364	IV	14310457	14310477	-1	0.974453	-0.181154	22.6236	32.2847	16.358	17.037	20.698	26.2024
WBGene00047013	21ur-4684	IV	17205944	17205964	1	0.872509	0.168547	181.492	212.541	219.055	198.481	289.773	200.413
WBGene00047014	21ur-4589	IV	15256167	15256187	1	0.567063	-0.239457	3171.83	3411.42	4073.85	3625.47	2950.87	2447.44
WBGene00047015	21ur-438	IV	14732559	14732579	-1	0.687746	-0.607823	14.0769	17.4875	13.5131	8.51849	13.9852	7.08172
WBGene00047016	21ur-4664	IV	5712071	5712091	1	0.818915	1.74587	0.502747	0	0	1.27777	0.559406	0
WBGene00047017	21ur-3636	IV	13886176	13886196	1	0.118462	1.57796	1.00549	2.24199	3.55609	6.81479	9.50991	2.83269
WBGene00047018	21ur-854	IV	16447035	16447055	1	0.839117	-1.36259	1.00549	2.69039	0.711217	0	1.11881	0.708172
WBGene00047019	21ur-2902	IV	15727963	15727983	-1	0.146973	0.476236	59.8268	85.6441	94.5919	105.203	128.663	98.4359
WBGene00047020	21ur-4325	IV	14709749	14709769	-1	0.059146	1.67785	1.50824	3.13879	4.2673	12.7777	9.50991	4.9572
WBGene00047021	21ur-108	IV	14097002	14097022	-1	1.92196e-11	1.33668	57.8159	56.9466	63.2983	146.518	147.683	154.382
WBGene00047022	21ur-4342	IV	15160544	15160564	1	0.974453	-0.937224	0.502747	0	0	0	0	0
WBGene00047023	21ur-908	IV	16137301	16137321	-1	0.974453	0.045872	1091.46	1053.29	1387.58	1432.38	1215.03	995.69
WBGene00047024	21ur-3958	IV	6410389	6410409	1	0.00137587	1.29688	12.0659	12.5552	11.3795	35.7777	27.4109	24.786
WBGene00047025	21ur-4391	IV	14041478	14041498	-1	0.528067	-1.6009	4.52472	2.69039	2.84487	0.851849	1.11881	1.41634
WBGene00047026	21ur-2415	IV	14976914	14976934	-1	0.229181	-1.16306	15.5851	10.3132	10.6683	4.25925	3.35644	9.20624
WBGene00047027	21ur-3600	IV	5838088	5838108	1	0.246625	1.1507	3.51923	2.69039	1.42243	6.81479	6.15347	4.24903
WBGene00047028	21ur-4825	IV	14972330	14972350	1	0.973866	-0.330272	8.04395	4.03559	5.68974	2.98147	5.03466	6.37355
WBGene00047029	21ur-1375	IV	15684063	15684083	-1	0.974453	0.0916352	128.703	137.21	192.029	170.37	168.941	145.883
WBGene00047030	21ur-2167	IV	14092272	14092292	-1	0.974453	0.259981	3.01648	3.58719	0.711217	2.12962	2.79703	4.24903
WBGene00047031	21ur-1039	IV	15248478	15248498	-1	0.885282	-0.441158	7.5412	6.72598	7.82339	3.4074	6.71288	6.37355
WBGene00047032	21ur-3924	IV	14695110	14695130	-1	0.270054	-0.764325	15.5851	14.7972	10.6683	8.09257	7.27228	9.20624
WBGene00047033	21ur-5110	IV	17205987	17206007	-1	0.65175	1.67194	1.00549	0	0.711217	2.55555	0.559406	2.12452
WBGene00047034	21ur-5279	IV	5334389	5334409	-1	0.881267	0.245187	358.961	360.064	492.162	666.998	535.352	230.864
WBGene00047035	21ur-2591	IV	6444655	6444675	-1	0.590302	0.709434	7.03845	3.13879	3.55609	6.38887	7.27228	9.20624
WBGene00047036	21ur-2578	IV	16447477	16447497	-1	0.925292	1.08646	0.502747	1.3452	0	0.851849	0.559406	2.83269
WBGene00047037	21ur-5166	IV	15891999	15892019	1	0.613043	-0.462811	54.7994	52.911	34.8496	28.9629	26.8515	48.8639
WBGene00047038	21ur-2182	IV	6403760	6403780	-1	1	0.0245639	0.502747	0	0	0.425925	0	0
WBGene00047039	21ur-1767	IV	16038059	16038079	-1	1	0.105818	0	0.448399	0.711217	0	0.559406	0.708172
WBGene00047040	21ur-5420	IV	16634120	16634140	1	0.0610702	2.0234	1.50824	2.69039	0.711217	5.1111	8.9505	7.08172
WBGene00047041	21ur-4815	IV	14599774	14599794	1	#N/A	#N/A	0	0	0	0	0	0
WBGene00047042	21ur-3530	IV	13603904	13603924	1	0.876254	0.463406	3.51923	4.03559	9.95704	5.96294	11.7475	5.66538
WBGene00047043	21ur-1043	IV	15606134	15606154	1	0.996107	-0.162257	1.00549	1.3452	0.711217	0	2.23763	0.708172
WBGene00047044	21ur-4758	IV	5610789	5610809	-1	0.0139205	1.48877	5.53021	4.48399	4.97852	17.037	11.1881	13.4553
WBGene00047045	21ur-196	IV	16018632	16018652	1	0.974453	-0.539234	1.50824	2.69039	0.711217	0.425925	1.67822	1.41634
WBGene00047046	21ur-775	IV	16820706	16820726	-1	0.0718157	-0.703665	143.786	100.89	105.971	52.8146	69.9258	94.1869
WBGene00047047	21ur-3067	IV	15267812	15267832	-1	1	0.0245639	0	0.448399	0	0	0.559406	0
WBGene00047048	21ur-1608	IV	13818368	13818388	1	1	-0.0884787	5.02747	5.38078	1.42243	2.12962	1.67822	7.78989
WBGene00047049	21ur-4608	IV	15426853	15426873	1	0.0222791	1.71855	5.53021	1.79359	3.55609	18.3148	10.6287	5.66538
WBGene00047050	21ur-1046	IV	15613539	15613559	-1	0.9778	-0.337764	3.01648	2.24199	0	3.4074	0	0.708172
WBGene00047051	21ur-1319	IV	15925652	15925672	1	0.552529	1.15234	3.51923	1.3452	0	3.4074	4.47525	3.54086
WBGene00047052	21ur-2215	IV	14706785	14706805	-1	0.974453	-0.485373	5.53021	4.03559	0	1.27777	2.23763	3.54086
WBGene00047053	21ur-594	IV	5821540	5821560	1	0.766791	-0.179965	130.714	123.758	132.286	123.518	115.238	101.269
WBGene00047054	21ur-4030	IV	13924307	13924327	-1	0.311364	1.33826	2.01099	1.79359	3.55609	5.1111	3.35644	9.91441
WBGene00047055	21ur-5432	IV	13998335	13998355	-1	0.860834	-0.192281	2350.84	2292.21	3537.59	2951.23	2587.25	1618.17
WBGene00047056	21ur-1732	IV	15177767	15177787	-1	0.854927	1.33137	0	0	1.42243	1.7037	0.559406	0.708172
WBGene00047057	21ur-1244	IV	14608265	14608285	1	0.336769	1.5019	2.51373	1.79359	1.42243	2.55555	8.3911	5.66538
WBGene00047058	21ur-5111	IV	15126994	15127014	1	0.886572	0.736351	2.01099	3.58719	2.13365	2.12962	6.71288	4.24903
WBGene00047059	21ur-4945	IV	15715031	15715051	1	0.974453	0.360987	1.00549	1.79359	2.13365	2.98147	1.11881	2.12452
WBGene00047060	21ur-4182	IV	14435217	14435237	1	1	0.23331	0	1.3452	0	0.425925	0.559406	0.708172
WBGene00047061	21ur-818	IV	6494083	6494103	1	1	0.127376	1.50824	1.3452	0.711217	0.425925	2.23763	1.41634
WBGene00047062	21ur-2774	IV	15602251	15602271	-1	0.691316	-0.181135	224.728	186.085	202.697	194.222	162.228	184.125
WBGene00047063	21ur-3537	IV	16209232	16209252	1	0.773998	-0.490266	30.1648	22.8683	12.8019	8.09257	15.104	24.786
WBGene00047064	21ur-5019	IV	14475696	14475716	1	0.989573	-0.0330847	316.228	282.043	379.079	341.592	332.287	279.02
WBGene00047065	21ur-503	IV	15068604	15068624	1	1	-0.0262207	180.989	198.641	283.776	143.537	262.921	245.028
WBGene00047066	21ur-3146	IV	14904903	14904923	-1	0.78494	-2.11267	2.51373	2.24199	0	0	1.11881	0
WBGene00047067	21ur-123	IV	16474023	16474043	-1	0.974453	0.372467	3.51923	3.13879	1.42243	4.68517	1.67822	4.24903
WBGene00047068	21ur-808	IV	15438538	15438558	-1	0.380694	-0.90124	33.684	25.5587	14.2243	8.94442	7.27228	24.0779
WBGene00047069	21ur-1131	IV	14250926	14250946	1	0.991913	0.305837	0	0.896797	1.42243	0.851849	0.559406	1.41634
WBGene00047070	21ur-2012	IV	15701559	15701579	1	#N/A	#N/A	0	0	0	0	0	0
WBGene00047071	21ur-3973	IV	16801182	16801202	-1	0.881267	-0.162935	172.945	136.313	217.632	181.444	153.277	133.136
WBGene00047072	21ur-994	IV	14683633	14683653	-1	0.974453	0.0699888	302.151	283.388	335.694	339.462	304.876	320.802
WBGene00047073	21ur-5037	IV	17056274	17056294	1	0.953923	-0.394245	7.03845	7.62278	2.84487	2.98147	4.47525	6.37355
WBGene00047074	21ur-2714	IV	16120735	16120755	1	0.953923	0.114058	166.409	171.288	214.788	189.536	215.931	191.206
WBGene00047075	21ur-1362	IV	14183831	14183851	1	4.48491e-05	1.50029	12.0659	18.8327	19.9141	55.7961	49.2278	36.8249
WBGene00047076	21ur-596	IV	16660139	16660159	-1	0.974453	0.312961	5.02747	1.79359	0.711217	1.7037	4.47525	3.54086
WBGene00047077	21ur-4670	IV	16123419	16123439	-1	0.974453	0.156336	35.695	34.5267	42.673	42.1665	44.1931	38.9495
WBGene00047078	21ur-1497	IV	16392892	16392912	-1	0.914151	-0.2596	14.5797	15.694	17.0692	12.7777	14.5446	12.0389
WBGene00047079	21ur-4902	IV	6190169	6190189	1	8.76729e-10	1.80982	20.6126	22.8683	16.358	82.6294	60.9753	67.9845
WBGene00047080	21ur-3981	IV	14714440	14714460	-1	1	-0.00206454	104.571	116.135	134.42	124.796	103.49	125.346
WBGene00047081	21ur-4209	IV	16196421	16196441	-1	0.974453	-1.9106	0	0.448399	0.711217	0	0	0
WBGene00047082	21ur-2161	IV	13610116	13610136	-1	4.46547e-07	1.81569	10.0549	12.5552	22.7589	60.9072	54.2624	38.9495
WBGene00047083	21ur-5196	IV	5840485	5840505	-1	1	0.0316357	1.00549	4.93238	0.711217	1.27777	1.67822	4.24903
WBGene00047084	21ur-5028	IV	5809473	5809493	-1	0.346419	0.783097	8.54669	4.48399	5.68974	11.5	10.6287	9.91441
WBGene00047085	21ur-3311	IV	14866776	14866796	1	0.535089	0.643576	16.0879	21.0747	20.6253	13.6296	48.6684	28.3269
WBGene00047086	21ur-4536	IV	14931035	14931055	1	0.974453	0.0683596	212.662	245.722	349.919	333.073	299.842	211.743
WBGene00047087	21ur-382	IV	16217542	16217562	-1	0.182164	-0.837175	31.1703	28.6975	27.0262	12.3518	15.104	21.9533
WBGene00047088	21ur-5263	IV	15503822	15503842	1	0.701353	1.4115	0.502747	0.896797	0	0.425925	1.11881	2.83269
WBGene00047089	21ur-1360	IV	15711337	15711357	-1	0.943359	0.51124	4.52472	3.58719	1.42243	2.12962	5.59406	6.37355
WBGene00047090	21ur-3447	IV	15177093	15177113	-1	0.974453	0.416657	0.502747	1.3452	2.13365	0.851849	1.67822	2.83269
WBGene00047091	21ur-1352	IV	16582437	16582457	-1	0.931748	-0.308067	14.5797	15.694	10.6683	6.81479	16.7822	9.91441
WBGene00047092	21ur-2909	IV	16801420	16801440	-1	0.00740491	1.0049	15.0824	14.7972	7.82339	29.3888	25.7327	21.9533
WBGene00047093	21ur-4786	IV	14450836	14450856	1	0.558942	-0.596409	21.6181	20.6263	12.0907	11.074	10.6287	14.8716
WBGene00047094	21ur-3432	IV	15713344	15713364	1	0.00300921	1.54378	6.53571	6.27758	9.95704	20.4444	20.698	24.0779
WBGene00047095	21ur-2304	IV	16783103	16783123	1	0.279685	1.95051	0.502747	0.448399	1.42243	2.12962	1.67822	4.9572
WBGene00047096	21ur-2892	IV	13840377	13840397	-1	0.550989	0.550322	20.1099	27.3523	27.0262	25.9814	55.3812	27.6187
WBGene00047097	21ur-836	IV	16143088	16143108	1	0.482961	2.46806	0	0	0	0	1.67822	0
WBGene00047098	21ur-1937	IV	16175842	16175862	-1	0.974453	-0.520085	2.51373	0	0	0	1.11881	0.708172
WBGene00047099	21ur-2541	IV	5918050	5918070	1	0.974453	0.124617	48.7664	42.1495	29.8711	36.2036	51.4654	45.323
WBGene00047100	21ur-4513	IV	15844269	15844289	1	0.988704	-0.114873	6.53571	4.93238	2.84487	3.4074	3.91584	6.37355
WBGene00047101	21ur-2874	IV	15140446	15140466	-1	0.951461	0.372383	1.00549	4.48399	8.5346	6.81479	5.59406	4.9572
WBGene00047102	21ur-5094	IV	5735630	5735650	-1	0.0198222	1.95818	1.00549	2.24199	3.55609	8.09257	10.0693	7.08172
WBGene00047103	21ur-4888	IV	17228313	17228333	1	0.0326272	0.978171	11.5632	12.1068	12.0907	22.9999	27.9703	19.1206
WBGene00047104	21ur-4043	IV	14900180	14900200	1	0.827216	-0.573057	13.0714	9.41637	4.2673	3.83332	9.50991	4.9572
WBGene00047105	21ur-1118	IV	16083731	16083751	1	0.974453	-0.200248	10.0549	11.6584	6.40095	6.38887	6.71288	12.0389
WBGene00047106	21ur-3073	IV	16670183	16670203	1	0.972523	1.90708	0	0	0	0.425925	0	0.708172
WBGene00047107	21ur-5446	IV	13898672	13898692	1	0.901652	0.81146	4.52472	2.24199	0	0.851849	4.47525	7.08172
WBGene00047108	21ur-2117	IV	13726636	13726656	1	0.974453	-0.287861	5.02747	5.38078	2.13365	2.98147	2.79703	4.9572
WBGene00047109	21ur-564	IV	16873768	16873788	1	1	-0.0447577	0	0.448399	2.13365	0	1.67822	0.708172
WBGene00047110	21ur-2598	IV	13749309	13749329	-1	1	-0.0882701	3.01648	1.3452	0.711217	0.425925	1.67822	2.83269
WBGene00047111	21ur-2984	IV	5745366	5745386	1	0.183469	0.95839	5.53021	4.48399	7.82339	16.1851	8.9505	7.78989
WBGene00047112	21ur-5325	IV	15884514	15884534	1	0.893588	-1.23923	0.502747	1.3452	0.711217	0.425925	0	0.708172
WBGene00047113	21ur-1555	IV	15071971	15071991	-1	0.712489	-0.348051	69.379	66.8114	48.3628	28.9629	48.6684	69.4009
WBGene00047114	21ur-1204	IV	5930555	5930575	1	0.974453	-0.135062	13.5742	6.27758	4.2673	8.09257	5.03466	9.20624
WBGene00047115	21ur-4794	IV	14136624	14136644	1	0.541837	-1.40599	6.03296	4.48399	4.97852	0.851849	1.67822	3.54086
WBGene00047116	21ur-3173	IV	14161969	14161989	-1	0.88213	0.166322	39.717	43.4947	50.4964	57.4998	44.1931	46.7394
WBGene00047117	21ur-20	IV	16631999	16632019	1	0.0329334	1.12297	9.55218	5.82918	6.40095	18.7407	12.3069	16.288
WBGene00047118	21ur-1210	IV	14126405	14126425	-1	0.0200659	1.39064	5.53021	7.17438	4.2673	16.6111	11.1881	17.7043
WBGene00047119	21ur-3457	IV	16383213	16383233	-1	0.0900758	0.943311	8.04395	8.51957	5.68974	17.4629	12.8663	12.7471
WBGene00047120	21ur-892	IV	16015411	16015431	1	5.91241e-05	1.8343	17.0934	23.7651	25.6038	137.148	54.8218	42.4903
WBGene00047121	21ur-2517	IV	15358216	15358236	-1	0.516792	-1.08827	8.54669	5.82918	2.13365	1.7037	2.23763	4.24903
WBGene00047122	21ur-4144	IV	5587414	5587434	-1	0.930761	0.893891	0.502747	0.448399	0.711217	0	1.11881	2.12452
WBGene00047123	21ur-1327	IV	16357142	16357162	1	0.613043	-1.07359	7.5412	5.38078	2.84487	0.851849	2.79703	4.24903
WBGene00047124	21ur-5008	IV	15089492	15089512	1	0.697314	-0.313639	200.093	229.58	188.473	172.925	195.233	128.887
WBGene00047125	21ur-1871	IV	14441329	14441349	-1	1	0.00947681	200.093	191.018	176.382	201.888	184.604	184.833
WBGene00047126	21ur-4172	IV	14602881	14602901	1	1	0.0245638	0	0.448399	0	0	0	0.708172
WBGene00047127	21ur-3000	IV	16225247	16225267	1	0.300192	1.1849	3.01648	2.24199	1.42243	5.96294	3.91584	5.66538
WBGene00047128	21ur-365	IV	16611465	16611485	-1	0.00451282	-0.568471	858.691	818.327	834.969	687.016	525.283	478.724
WBGene00047129	21ur-3282	IV	16215567	16215587	-1	0.365471	0.746171	6.03296	7.17438	5.68974	10.6481	10.0693	11.3308
WBGene00047130	21ur-1301	IV	14483678	14483698	-1	0.995287	0.303855	1.00549	0.448399	0	0	0.559406	1.41634
WBGene00047131	21ur-5401	IV	16137118	16137138	1	0.406224	-0.7781	36.1978	50.2206	22.7589	12.7777	23.4951	28.3269
WBGene00047132	21ur-1601	IV	5751017	5751037	-1	0.974453	0.258917	6.03296	5.38078	7.82339	5.1111	6.15347	12.0389
WBGene00047133	21ur-1054	IV	16220680	16220700	-1	0.973867	-1.00174	0	1.3452	0.711217	0.425925	0.559406	0
WBGene00047134	21ur-11	IV	17035805	17035825	-1	0.356976	1.02769	1.50824	2.69039	5.68974	7.66664	5.59406	5.66538
WBGene00047135	21ur-3183	IV	14399897	14399917	1	0.499893	0.944558	3.01648	3.58719	2.13365	6.38887	5.03466	5.66538
WBGene00047136	21ur-3656	IV	16798834	16798854	-1	0.785986	-0.888146	4.02197	2.24199	2.13365	0.425925	2.23763	2.12452
WBGene00047137	21ur-2098	IV	15314039	15314059	1	0.270054	1.68776	2.01099	0.896797	1.42243	1.7037	2.79703	9.91441
WBGene00047138	21ur-1770	IV	13820102	13820122	-1	0.829683	-0.178303	175.961	181.153	165.002	192.518	145.446	121.806
WBGene00047139	21ur-647	IV	13762729	13762749	1	1	0.0572317	0.502747	1.3452	0.711217	0.851849	1.11881	0.708172
WBGene00047140	21ur-3860	IV	14829889	14829909	1	0.208627	-0.525023	70.3845	60.9822	58.3198	37.4814	46.4307	48.8639
WBGene00047141	21ur-2369	IV	16171215	16171235	1	0.812705	1.12452	1.50824	0.896797	0	2.55555	2.79703	0
WBGene00047142	21ur-2005	IV	14587076	14587096	1	0.555817	0.3769	94.0136	125.103	101.704	106.055	176.213	135.261
WBGene00047143	21ur-1905	IV	15974975	15974995	-1	0.8208	-2.29078	1.50824	1.3452	0	0.425925	0	0
WBGene00047144	21ur-1109	IV	16452010	16452030	1	0.371675	-0.414439	55.3021	63.6726	73.2554	50.685	41.3961	51.6966
WBGene00047145	21ur-4215	IV	16600396	16600416	-1	0.630119	-0.562306	20.1099	23.7651	20.6253	13.2037	15.104	15.5798
WBGene00047146	21ur-4133	IV	16133251	16133271	-1	0.136105	1.07057	5.53021	6.27758	7.82339	10.6481	16.2228	14.1634
WBGene00047147	21ur-3371	IV	14538531	14538551	1	0.997468	0.126869	3.01648	3.58719	2.84487	1.7037	3.91584	4.9572
WBGene00047148	21ur-2930	IV	16605367	16605387	1	1	0.0208986	1.50824	0	0.711217	0	2.23763	0
WBGene00047149	21ur-4546	IV	15774000	15774020	-1	0.905674	-2.77922	0	0	2.13365	0	0	0
WBGene00047150	21ur-3833	IV	14027510	14027530	-1	0.991943	-0.0426408	28.1538	36.7687	34.1384	31.0925	31.3268	33.9923
WBGene00047151	21ur-2390	IV	13811720	13811740	1	0.724098	1.13248	0	1.79359	0.711217	2.55555	2.23763	0.708172
WBGene00047152	21ur-2956	IV	16258620	16258640	-1	0.99636	0.0733546	9.04944	10.3132	7.11217	6.81479	8.3911	13.4553
WBGene00047153	21ur-2744	IV	14294792	14294812	-1	0.000782913	1.38472	11.5632	14.3488	9.24582	41.3147	24.0545	26.9105
WBGene00047154	21ur-3648	IV	4836613	4836633	-1	0.974453	-0.373742	9.55218	4.93238	2.13365	4.25925	1.11881	7.78989
WBGene00047155	21ur-1984	IV	14413907	14413927	-1	0.337559	-0.443309	92.5054	75.331	66.8544	53.2406	55.9406	64.4437
WBGene00047156	21ur-3081	IV	17157980	17158000	1	1	-0.0159566	56.8104	67.2598	68.2768	77.0924	60.4159	50.9884
WBGene00047157	21ur-925	IV	14972386	14972406	-1	0.98946	0.0312704	294.609	290.562	361.298	321.999	293.129	351.253
WBGene00047158	21ur-3515	IV	15664124	15664144	-1	0.190435	0.688409	11.0604	12.5552	12.0907	18.7407	18.4604	20.537
WBGene00047159	21ur-4968	IV	16368992	16369012	-1	1	0.393397	0	0.896797	0	0	0.559406	0.708172
WBGene00047160	21ur-5314	IV	15779929	15779949	-1	0.969474	-0.747223	4.02197	2.69039	0.711217	1.7037	0	2.83269
WBGene00047161	21ur-3305	IV	14927231	14927251	-1	0.842405	-0.186521	89.4889	85.6441	101.704	83.4812	94.5397	63.7355
WBGene00047162	21ur-5454	IV	14743903	14743923	-1	0.881267	-0.530601	10.0549	8.07118	3.55609	5.1111	4.47525	5.66538
WBGene00047163	21ur-2554	IV	13954271	13954291	1	0.427524	-1.11412	11.5632	9.41637	5.68974	4.25925	3.91584	4.24903
WBGene00047164	21ur-5275	IV	14404217	14404237	1	0.319916	0.712938	8.04395	10.3132	5.68974	16.1851	12.3069	11.3308
WBGene00047165	21ur-1085	IV	14120833	14120853	1	0.967827	1.42326	0	0.448399	0	0.425925	1.11881	0
WBGene00047166	21ur-376	IV	14863583	14863603	-1	0.974453	1.0869	0.502747	0.448399	0	0.851849	0.559406	0.708172
WBGene00047167	21ur-3130	IV	15212192	15212212	1	0.959847	0.966682	0.502747	0.896797	0	0.425925	1.11881	1.41634
WBGene00047168	21ur-1598	IV	13810184	13810204	1	8.47412e-07	2.74806	1.50824	4.03559	3.55609	20.8703	24.0545	15.5798
WBGene00047169	21ur-2158	IV	5329348	5329368	1	0.957439	2.2032	0	0	0	0	0	1.41634
WBGene00047170	21ur-1761	IV	15727515	15727535	1	0.974453	-0.124401	37.706	39.4591	28.4487	34.074	34.1238	29.0351
WBGene00047171	21ur-1369	IV	14721048	14721068	-1	1	0	0	0	0	0	0	0
WBGene00047172	21ur-3620	IV	17032691	17032711	1	0.535808	-0.69997	13.5742	13.0036	16.358	10.6481	8.9505	6.37355
WBGene00047173	21ur-623	IV	6174272	6174292	1	0.828207	-0.748971	5.02747	5.82918	2.84487	2.12962	3.35644	2.83269
WBGene00047174	21ur-4801	IV	16078258	16078278	1	0.734734	0.869271	2.01099	3.13879	2.84487	2.98147	2.79703	9.20624
WBGene00047175	21ur-4927	IV	15880204	15880224	1	0.794587	-0.358257	75.9147	67.2598	42.673	36.2036	44.1931	65.86
WBGene00047176	21ur-991	IV	16543828	16543848	1	0.0230478	0.995599	15.5851	11.21	15.6468	36.6295	19.5792	26.9105
WBGene00047177	21ur-1704	IV	16696700	16696720	-1	0.904757	1.21513	0.502747	0.448399	0.711217	0.425925	0	3.54086
WBGene00047178	21ur-702	IV	16571635	16571655	-1	0.974453	-0.106947	14.5797	17.9359	14.9356	15.3333	13.9852	14.8716
WBGene00047179	21ur-689	IV	5284106	5284126	-1	0.724588	-0.275542	81.4449	63.2242	51.9188	60.4813	53.1436	48.8639
WBGene00047180	21ur-2921	IV	14757962	14757982	1	0.550515	-0.558326	17.0934	22.4199	22.7589	13.2037	16.2228	12.7471
WBGene00047181	21ur-5156	IV	16176738	16176758	-1	8.53282e-05	1.58402	16.5906	9.86477	21.3365	45.9999	43.6337	50.9884
WBGene00047182	21ur-4003	IV	15885074	15885094	-1	0.284615	0.992858	5.53021	4.48399	7.82339	13.6296	8.3911	12.7471
WBGene00047183	21ur-3855	IV	15483813	15483833	-1	1	0.249234	1.00549	0.448399	0	0	1.11881	0.708172
WBGene00047184	21ur-1259	IV	13889092	13889112	-1	0.631577	-0.954945	8.04395	7.62278	2.13365	2.55555	3.35644	3.54086
WBGene00047185	21ur-336	IV	16011237	16011257	-1	1	0.0966095	3.01648	2.69039	3.55609	3.4074	2.23763	4.24903
WBGene00047186	21ur-312	IV	16122123	16122143	1	0.974453	0.141013	26.1428	21.5231	19.2029	22.9999	29.0891	21.9533
WBGene00047187	21ur-5430	IV	5103112	5103132	1	0.075113	2.33409	0.502747	0.448399	2.13365	5.96294	5.59406	2.12452
WBGene00047188	21ur-622	IV	6174615	6174635	-1	0.930503	1.43268	0.502747	0	0	0.425925	1.11881	0
WBGene00047189	21ur-2255	IV	16601240	16601260	-1	0.954712	-2.00073	1.00549	1.3452	0	0	0	0.708172
WBGene00047190	21ur-2710	IV	15334521	15334541	-1	1	-0.00981949	1201.06	1111.58	1237.52	1393.63	1187.06	942.577
WBGene00047191	21ur-615	IV	6047945	6047965	1	0.104439	-0.837649	37.2032	29.1459	29.1599	16.6111	21.2574	15.5798
WBGene00047192	21ur-1276	IV	16520746	16520766	-1	1.71308e-07	1.37603	33.684	31.3879	41.9618	109.889	83.3516	80.7316
WBGene00047193	21ur-1076	IV	13606514	13606534	-1	0.491803	-1.44439	4.52472	4.93238	4.97852	1.7037	2.79703	0.708172
WBGene00047194	21ur-4307	IV	16279147	16279167	1	0.792904	-0.153483	386.612	345.715	393.303	375.665	354.664	279.02
WBGene00047195	21ur-5293	IV	14104281	14104301	-1	0.505129	-2.79087	3.01648	1.3452	2.84487	0.425925	0.559406	0
WBGene00047196	21ur-294	IV	14887062	14887082	1	0.875137	-0.171987	189.535	203.125	270.974	250.018	162.228	174.21
WBGene00047197	21ur-5335	IV	15174994	15175014	1	0.533392	-0.416105	99.5438	89.6797	80.3675	45.5739	56.5	101.977
WBGene00047198	21ur-1742	IV	16096595	16096615	-1	0.0208047	1.02139	8.54669	10.7616	13.5131	21.7222	25.1733	18.4125
WBGene00047199	21ur-3699	IV	16042507	16042527	1	0.997087	0.0494894	18.0989	27.3523	25.6038	21.7222	21.8169	30.4514
WBGene00047200	21ur-5212	IV	16079841	16079861	1	0.996795	-0.140656	1.00549	4.03559	4.2673	2.12962	2.79703	3.54086
WBGene00047201	21ur-2205	IV	15864545	15864565	1	0.959526	-0.367097	10.0549	8.51957	5.68974	3.4074	3.35644	12.7471
WBGene00047202	21ur-4714	IV	14971774	14971794	-1	0.0122796	0.995635	19.1044	21.9715	35.5609	59.2035	55.3812	34.7004
WBGene00047203	21ur-228	IV	16558450	16558470	1	0.428987	0.502268	21.6181	20.6263	25.6038	23.4259	34.1238	38.9495
WBGene00047204	21ur-2371	IV	14983174	14983194	-1	0.347255	-0.608924	110.101	73.9858	57.6086	55.7961	40.2773	63.0273
WBGene00047205	21ur-1749	IV	5981472	5981492	-1	0.974453	-0.102267	36.7005	37.2171	45.5179	26.8332	31.8862	53.1129
WBGene00047206	21ur-2698	IV	13946067	13946087	1	0.0613795	-0.538778	319.747	291.459	339.962	222.759	259.005	171.378
WBGene00047207	21ur-3512	IV	16688964	16688984	1	1	0.058507	1.50824	0.448399	0.711217	0.425925	1.67822	0.708172
WBGene00047208	21ur-320	IV	14305745	14305765	-1	0.0031737	-0.813277	130.714	139.9	98.8592	71.9813	61.5347	77.8989
WBGene00047209	21ur-267	IV	6397494	6397514	-1	0.974453	-1.19856	0.502747	0.896797	1.42243	0	0.559406	0.708172
WBGene00047210	21ur-1431	IV	14686579	14686599	-1	0.974453	-0.623906	0	1.3452	1.42243	0	1.11881	0.708172
WBGene00047211	21ur-785	IV	14403915	14403935	1	0.902441	-0.275079	50.2747	57.395	34.1384	20.4444	40.2773	58.0701
WBGene00047212	21ur-655	IV	16683319	16683339	1	0.640773	-0.558271	22.6236	20.1779	14.2243	11.5	9.50991	18.4125
WBGene00047213	21ur-4233	IV	14338850	14338870	1	0.000152659	0.967374	210.148	201.779	301.556	520.48	487.802	381.705
WBGene00047214	21ur-1309	IV	15990337	15990357	-1	1	0.0590639	5.53021	2.24199	8.5346	6.81479	6.71288	2.83269
WBGene00047215	21ur-2360	IV	15321383	15321403	1	0.984806	-0.0435597	139.764	109.858	204.83	175.055	132.579	130.304
WBGene00047216	21ur-1692	IV	13761626	13761646	-1	0.949408	0.317742	9.04944	5.82918	9.95704	5.53702	6.15347	19.8288
WBGene00047217	21ur-2060	IV	14977860	14977880	1	0.473356	-0.835541	13.0714	11.21	7.11217	5.1111	4.47525	8.49806
WBGene00047218	21ur-3330	IV	16356106	16356126	-1	2.77072e-05	2.05747	5.02747	5.82918	5.68974	25.1296	23.4951	19.8288
WBGene00047219	21ur-5383	IV	15753829	15753849	-1	0.975188	0.353067	2.51373	0.896797	0	0.425925	3.35644	0.708172
WBGene00047220	21ur-5187	IV	5861524	5861544	-1	1	-0.158394	1.50824	1.79359	0	0	0.559406	2.83269
WBGene00047221	21ur-3216	IV	5970439	5970459	-1	0.612149	0.258192	72.8983	62.3274	72.5441	81.3516	81.1139	85.6888
WBGene00047222	21ur-1975	IV	16587495	16587515	-1	3.43143e-05	0.852913	99.5438	102.683	118.773	192.518	181.807	203.954
WBGene00047223	21ur-230	IV	14883005	14883025	1	0.0238604	0.975807	27.1483	26.0071	12.0907	29.8147	54.2624	47.4475
WBGene00047224	21ur-496	IV	14047175	14047195	1	0.249692	2.20811	0.502747	0.448399	1.42243	2.55555	2.23763	5.66538
WBGene00047225	21ur-3043	IV	5969462	5969482	1	0.000751446	1.82985	5.02747	3.13879	4.2673	17.4629	11.1881	14.8716
WBGene00047226	21ur-3322	IV	14359645	14359665	-1	0.00273353	1.08194	12.5687	15.2456	14.2243	29.8147	26.2921	33.2841
WBGene00047227	21ur-4482	IV	16221001	16221021	-1	0.797596	-2.75902	0	1.3452	0.711217	0	0	0
WBGene00047228	21ur-4700	IV	14292641	14292661	-1	0.974453	-0.294627	5.02747	3.58719	3.55609	2.98147	2.79703	4.24903
WBGene00047229	21ur-4421	IV	15755948	15755968	-1	0.345482	-0.31116	117.643	118.377	122.329	90.7219	104.609	93.4787
WBGene00047230	21ur-5071	IV	15282223	15282243	1	0.934429	2.49298	0	0	0	0.425925	0.559406	0.708172
WBGene00047231	21ur-4228	IV	13941867	13941887	1	0.805164	-0.455809	10.5577	8.96797	9.95704	6.81479	5.03466	9.91441
WBGene00047232	21ur-5184	IV	15768231	15768251	-1	0.923731	-0.171299	126.692	126	164.291	78.3701	122.51	170.669
WBGene00047233	21ur-4118	IV	5128074	5128094	-1	0.952662	0.456726	3.51923	4.03559	1.42243	2.55555	7.27228	2.83269
WBGene00047234	21ur-4874	IV	15566610	15566630	1	0.0638058	-0.443441	496.714	472.164	503.542	396.11	323.896	361.876
WBGene00047235	21ur-2295	IV	15340012	15340032	-1	0.688102	-0.265918	258.914	227.786	166.425	166.537	180.688	197.58
WBGene00047236	21ur-3882	IV	4961787	4961807	-1	0.000149965	2.06848	2.51373	4.93238	6.40095	19.5925	21.8169	14.8716
WBGene00047237	21ur-1040	IV	17199155	17199175	-1	#N/A	#N/A	0	0	0	0	0	0
WBGene00047238	21ur-5206	IV	16547814	16547834	1	0.402121	1.62453	1.00549	0.896797	0.711217	1.7037	5.03466	1.41634
WBGene00047239	21ur-2261	IV	16783873	16783893	1	0.975198	-0.109231	14.5797	10.7616	10.6683	12.3518	8.3911	12.7471
WBGene00047240	21ur-4523	IV	14671877	14671897	-1	0.888487	-0.287201	67.368	75.331	41.2506	38.3332	40.8367	72.9417
WBGene00047241	21ur-2284	IV	16137415	16137435	-1	0.688102	-0.588038	14.5797	11.21	12.0907	9.79627	6.15347	9.20624
WBGene00047242	21ur-109	IV	15759319	15759339	-1	0.974453	0.986352	0	0	0	0	0.559406	0
WBGene00047243	21ur-3706	IV	16381019	16381039	1	2.29528e-05	2.24588	2.51373	6.27758	6.40095	24.2777	26.8515	19.8288
WBGene00047244	21ur-2622	IV	16070775	16070795	-1	0.974453	0.331344	2.51373	2.24199	0.711217	2.12962	2.23763	2.83269
WBGene00047245	21ur-2933	IV	6062774	6062794	-1	0.00640617	1.07744	14.0769	25.1103	31.2935	56.222	50.3466	39.6576
WBGene00047246	21ur-4090	IV	15749851	15749871	-1	0.997087	0.0572464	22.1208	19.2811	11.3795	14.0555	17.3416	24.786
WBGene00047247	21ur-2699	IV	16212391	16212411	-1	0.827457	-0.269888	23.6291	28.6975	24.8926	28.9629	18.4604	15.5798
WBGene00047248	21ur-5419	IV	14092024	14092044	-1	0.349853	-0.729762	30.1648	27.8007	17.0692	15.3333	10.0693	20.537
WBGene00047249	21ur-2270	IV	14403788	14403808	-1	0.798932	-0.340819	42.7335	30.9395	19.2029	20.8703	18.4604	35.4086
WBGene00047250	21ur-33	IV	15818597	15818617	-1	0.534724	-1.45762	10.0549	4.03559	2.13365	0.425925	2.23763	3.54086
WBGene00047251	21ur-4284	IV	14906161	14906181	1	0.974453	-0.228196	3.51923	4.48399	4.97852	1.27777	1.67822	8.49806
WBGene00047252	21ur-3353	IV	14054533	14054553	-1	0.974453	0.229057	3.01648	1.79359	1.42243	0.851849	3.35644	3.54086
WBGene00047253	21ur-3232	IV	16977914	16977934	-1	0.496989	-0.429901	57.3131	60.9822	50.4964	31.9443	43.6337	50.9884
WBGene00047254	21ur-1230	IV	5443633	5443653	-1	0.780023	-0.615568	7.03845	5.82918	7.11217	3.83332	5.59406	3.54086
WBGene00047255	21ur-216	IV	15806516	15806536	1	0.975952	-0.0773776	30.1648	20.6263	20.6253	16.6111	22.3763	29.7432
WBGene00047256	21ur-2691	IV	14270029	14270049	-1	0.974453	1.09613	0	0.448399	0	0	0.559406	0.708172
WBGene00047257	21ur-1965	IV	16728285	16728305	-1	0.834223	0.801446	1.00549	1.79359	1.42243	1.27777	2.79703	3.54086
WBGene00047258	21ur-1075	IV	15706678	15706698	-1	0.728025	-0.784404	10.0549	9.41637	2.13365	5.1111	3.35644	4.24903
WBGene00047259	21ur-3329	IV	5565484	5565504	-1	0.881267	-0.301003	32.6785	33.6299	16.358	15.7592	26.2921	26.2024
WBGene00047260	21ur-346	IV	14490146	14490166	1	0.361736	2.03244	0.502747	0.448399	1.42243	0.851849	2.23763	6.37355
WBGene00047261	21ur-4926	IV	15403495	15403515	-1	0.846623	0.529396	6.03296	5.38078	1.42243	4.68517	5.59406	9.20624
WBGene00047262	21ur-2078	IV	15755953	15755973	-1	0.345482	-0.31116	117.643	118.377	122.329	90.7219	104.609	93.4787
WBGene00047263	21ur-1158	IV	15605529	15605549	1	0.0947295	1.30357	7.5412	6.72598	2.84487	20.0185	12.8663	9.91441
WBGene00047264	21ur-406	IV	13889751	13889771	-1	3.64999e-06	1.55681	31.673	22.8683	12.8019	56.648	63.2129	82.8561
WBGene00047265	21ur-1694	IV	14675220	14675240	-1	0.0835823	0.761707	14.5797	14.7972	22.0477	27.6851	25.1733	33.2841
WBGene00047266	21ur-327	IV	14982117	14982137	-1	0.986054	0.391431	0	0.896797	0	0	0	1.41634
WBGene00047267	21ur-2173	IV	14393939	14393959	1	0.549456	0.310791	258.412	217.473	244.659	272.166	275.228	347.004
WBGene00047268	21ur-1810	IV	13828448	13828468	1	0.435061	-1.05665	12.5687	8.96797	8.5346	2.98147	2.79703	9.20624
WBGene00047269	21ur-2559	IV	14904205	14904225	1	0.707281	-0.908106	6.03296	4.03559	3.55609	1.27777	3.35644	2.83269
WBGene00047270	21ur-2736	IV	17184635	17184655	-1	0.917233	-0.290953	20.1099	30.0427	12.0907	18.7407	12.3069	20.537
WBGene00047271	21ur-3225	IV	15889050	15889070	1	0.499958	-0.454719	51.7829	39.4591	44.8067	29.3888	27.4109	43.1985
WBGene00047272	21ur-1217	IV	15211948	15211968	1	0.690181	-0.193805	932.092	715.644	677.79	619.72	638.283	777.573
WBGene00047273	21ur-4848	IV	15690034	15690054	1	0.959526	-0.112151	111.107	83.4021	90.3246	88.5923	84.4704	90.646
WBGene00047274	21ur-3493	IV	15884846	15884866	1	1	0.0245637	0.502747	0	0	0	0.559406	0
WBGene00047275	21ur-4093	IV	16688711	16688731	1	0.294744	-0.542387	43.2362	41.2527	32.716	25.9814	23.4951	31.8677
WBGene00047276	21ur-1448	IV	17035628	17035648	1	0.505659	-0.732804	53.2911	51.5658	33.4272	14.9074	18.4604	50.9884
WBGene00047277	21ur-3218	IV	16553616	16553636	-1	0.809639	-0.636419	8.04395	11.6584	7.82339	1.27777	4.47525	12.7471
WBGene00047278	21ur-4260	IV	6164480	6164500	1	0.974453	-0.937224	0.502747	0	0	0	0	0
WBGene00047279	21ur-985	IV	15680618	15680638	1	0.688102	2.56621	0	0	0	0	1.11881	0.708172
WBGene00047280	21ur-5216	IV	14904658	14904678	1	0.0890343	-1.13392	25.6401	26.9039	13.5131	10.6481	7.83169	12.0389
WBGene00047281	21ur-5334	IV	15389736	15389756	-1	0.734734	-0.211669	368.513	353.787	410.372	433.165	290.332	251.401
WBGene00047282	21ur-1444	IV	15974097	15974117	-1	0.959526	-0.0993306	582.683	725.509	812.21	756.442	687.51	532.545
WBGene00047283	21ur-2911	IV	17156959	17156979	1	0.00352325	1.51455	8.54669	5.38078	12.8019	30.6666	22.3763	20.537
WBGene00047284	21ur-4917	IV	13728843	13728863	1	1	0.412041	1.00549	0	0	0	0	1.41634
WBGene00047285	21ur-143	IV	15655489	15655509	1	0.0707591	-1.08024	37.706	30.9395	18.4916	9.37034	19.0198	13.4553
WBGene00047286	21ur-2967	IV	16182013	16182033	-1	0.828207	1.09681	0.502747	1.3452	0.711217	1.27777	2.23763	2.12452
WBGene00047287	21ur-5374	IV	14984468	14984488	1	0.995206	0.0325752	893.883	910.698	1201.25	1286.29	940.922	844.141
WBGene00047288	21ur-1243	IV	16341706	16341726	-1	0.974453	-0.937224	0	0	0.711217	0	0	0
WBGene00047289	21ur-2636	IV	14967271	14967291	1	0.00370782	-1.55794	35.695	30.9395	22.0477	6.38887	11.7475	12.7471
WBGene00047290	21ur-993	IV	16572843	16572863	-1	0.974453	-0.131728	10.5577	6.72598	5.68974	8.09257	7.83169	4.9572
WBGene00047291	21ur-1756	IV	15868448	15868468	1	0.00181382	1.58142	7.03845	5.82918	8.5346	25.1296	19.0198	18.4125
WBGene00047292	21ur-1716	IV	14242028	14242048	1	0.00754952	1.032	21.1154	14.7972	10.6683	33.648	32.4456	30.4514
WBGene00047293	21ur-4028	IV	15544729	15544749	1	0.974453	0.435541	1.50824	0.448399	1.42243	0.851849	2.23763	1.41634
WBGene00047294	21ur-1603	IV	14567471	14567491	1	0.401837	2.19973	0	0.896797	0	2.12962	1.11881	1.41634
WBGene00047295	21ur-4073	IV	14888216	14888236	-1	0.0121353	1.20549	12.0659	13.452	16.358	37.4814	30.2079	27.6187
WBGene00047296	21ur-4531	IV	14748896	14748916	1	0.0384859	-0.508287	181.492	154.249	175.671	125.648	113.56	119.681
WBGene00047297	21ur-3462	IV	16804366	16804386	-1	0.539003	0.940413	3.01648	0.896797	4.2673	5.53702	5.03466	4.24903
WBGene00047298	21ur-2064	IV	14134497	14134517	-1	0.905674	1.52293	0.502747	0.448399	0	1.7037	1.11881	0
WBGene00047299	21ur-3652	IV	16083245	16083265	1	1	-0.0966771	2.01099	0.448399	0.711217	0.425925	0.559406	2.12452
WBGene00047300	21ur-1514	IV	15603279	15603299	1	0.00098486	-0.602415	387.115	361.858	342.095	224.462	257.886	237.238
WBGene00047301	21ur-3021	IV	14507530	14507550	1	0.889407	-0.439864	11.0604	7.62278	4.2673	5.96294	6.15347	4.9572
WBGene00047302	21ur-3390	IV	15072995	15073015	-1	#N/A	#N/A	0	0	0	0	0	0
WBGene00047303	21ur-2757	IV	14806408	14806428	1	0.741406	0.612327	8.04395	9.41637	17.7804	11.5	17.3416	24.786
WBGene00047304	21ur-3273	IV	13717736	13717756	-1	0.74861	0.261183	30.1648	35.8719	38.4057	41.7406	42.5149	40.3658
WBGene00047305	21ur-4774	IV	16630378	16630398	1	0.000424965	-0.558976	1156.82	1023.25	1122.3	768.794	702.614	769.783
WBGene00047306	21ur-286	IV	14388974	14388994	-1	0.076557	0.937956	11.0604	10.3132	14.2243	28.9629	17.901	19.8288
WBGene00047307	21ur-1411	IV	5051517	5051537	1	0.596875	0.95399	3.01648	1.79359	2.13365	4.25925	5.59406	3.54086
WBGene00047308	21ur-1268	IV	14040280	14040300	-1	0.974453	-0.398251	4.52472	6.27758	2.84487	2.98147	3.35644	4.24903
WBGene00047309	21ur-1183	IV	15756326	15756346	1	#N/A	#N/A	0	0	0	0	0	0
WBGene00047310	21ur-2019	IV	14850147	14850167	1	0.51454	-0.829062	20.6126	27.3523	13.5131	10.2222	13.9852	10.6226
WBGene00047311	21ur-743	IV	13646066	13646086	1	0.284615	0.380705	97.5328	127.794	120.907	174.203	151.599	123.222
WBGene00047312	21ur-4445	IV	5199840	5199860	-1	0.266572	1.13887	2.01099	2.69039	5.68974	7.66664	4.47525	9.91441
WBGene00047313	21ur-2601	IV	16530178	16530198	-1	0.0172526	0.745224	40.7225	39.4591	44.8067	77.5183	75.5199	54.5292
WBGene00047314	21ur-483	IV	15397130	15397150	-1	0.000971277	1.37472	7.03845	9.86477	9.95704	26.4073	26.2921	15.5798
WBGene00047315	21ur-835	IV	14642462	14642482	-1	0.0144966	-1.50073	19.6071	15.694	15.6468	5.1111	6.71288	6.37355
WBGene00047316	21ur-1237	IV	16027064	16027084	1	0.831698	0.236837	4282.4	4029.76	7855.39	8235.68	6158.51	4654.11
WBGene00047317	21ur-3056	IV	14407546	14407566	-1	0.974453	-0.087029	25.6401	24.2135	19.2029	17.8888	21.8169	26.2024
WBGene00047318	21ur-4723	IV	15237444	15237464	1	0.827457	0.31005	21.6181	21.9715	22.0477	22.9999	33.005	25.4942
WBGene00047319	21ur-1474	IV	13946600	13946620	1	0.974453	0.080642	49.2692	42.1495	60.4534	41.3147	60.4159	58.7783
WBGene00047320	21ur-1536	IV	16698565	16698585	-1	0.974453	-0.204542	31.673	34.0783	17.0692	15.3333	37.4802	19.8288
WBGene00047321	21ur-3418	IV	14628161	14628181	-1	0.974453	-0.19455	12.0659	10.3132	2.84487	5.1111	8.3911	9.20624
WBGene00047322	21ur-4373	IV	16977373	16977393	1	5.30748e-06	1.13287	35.1923	33.1815	46.2291	92.4256	87.2674	67.2763
WBGene00047323	21ur-953	IV	14975221	14975241	-1	0.959981	0.526369	2.51373	0.896797	1.42243	1.27777	1.67822	4.24903
WBGene00047324	21ur-2339	IV	16747706	16747726	-1	0.612149	-2.30474	1.00549	1.79359	0	0	0	0.708172
WBGene00047325	21ur-2679	IV	15296717	15296737	-1	0.719936	-0.33911	36.7005	41.2527	59.031	41.7406	30.7674	34.7004
WBGene00047326	21ur-4876	IV	17200621	17200641	-1	0.0185278	1.31788	9.55218	8.51957	28.4487	48.9813	29.6485	33.2841
WBGene00047327	21ur-53	IV	16774947	16774967	1	0.991671	-0.234795	2.01099	1.3452	0.711217	1.7037	1.67822	0
WBGene00047328	21ur-3017	IV	15291167	15291187	1	0.974453	-0.379052	2.01099	3.13879	4.2673	1.27777	4.47525	1.41634
WBGene00047329	21ur-4601	IV	16438574	16438594	-1	0.194017	-0.629218	73.9037	86.5409	52.6301	41.3147	42.5149	55.2374
WBGene00047330	21ur-1112	IV	13833948	13833968	-1	0.974453	-0.124504	41.728	38.1139	36.9833	23.8518	35.802	48.8639
WBGene00047331	21ur-2998	IV	14287105	14287125	1	0.900602	0.208864	18.6016	20.1779	22.0477	29.3888	17.3416	22.6615
WBGene00047332	21ur-88	IV	14328832	14328852	-1	0.788229	-0.204106	471.576	547.495	674.945	615.035	491.159	361.168
WBGene00047333	21ur-974	IV	15879095	15879115	-1	0.959526	0.346257	5.02747	2.69039	2.13365	4.25925	1.67822	7.08172
WBGene00047334	21ur-1870	IV	15768841	15768861	1	0.672199	0.443269	13.0714	12.5552	9.24582	17.4629	13.4258	16.9961
WBGene00047335	21ur-867	IV	15216970	15216990	-1	0.524935	0.4139	48.2637	70.3986	73.9666	103.926	86.708	64.4437
WBGene00047336	21ur-2993	IV	14920659	14920679	1	1	-0.0422345	1.50824	0.448399	0	1.27777	0.559406	0
WBGene00047337	21ur-3289	IV	17056010	17056030	1	0.0649635	0.82356	19.6071	20.6263	17.0692	32.3703	39.7179	29.7432
WBGene00047338	21ur-2291	IV	17158015	17158035	-1	0.555817	-0.348337	42.2307	43.9431	40.5394	31.0925	29.6485	39.6576
WBGene00047339	21ur-3628	IV	14506799	14506819	-1	0.978054	0.0360023	310.697	280.698	394.725	382.906	311.589	313.012
WBGene00047340	21ur-429	IV	13732433	13732453	1	0.575692	0.968462	4.02197	2.24199	0.711217	5.1111	2.79703	6.37355
WBGene00047341	21ur-5283	IV	15566414	15566434	1	0.206661	-0.698468	50.2747	49.3238	41.2506	20.4444	31.3268	36.1168
WBGene00047342	21ur-3754	IV	16272794	16272814	-1	0.0104916	1.99849	1.50824	1.3452	4.2673	8.94442	9.50991	7.78989
WBGene00047343	21ur-1181	IV	13627029	13627049	-1	0.974453	-0.163617	27.6511	18.3843	19.2029	14.0555	20.698	24.0779
WBGene00047344	21ur-3285	IV	16023759	16023779	-1	0.480273	-0.781654	23.1263	21.5231	7.11217	8.94442	8.3911	13.4553
WBGene00047345	21ur-5309	IV	16176140	16176160	-1	0.974453	0.832739	0.502747	0.448399	0	0.425925	0	1.41634
WBGene00047346	21ur-2264	IV	16457823	16457843	-1	0.00377418	-0.600484	709.878	672.15	604.534	450.628	456.476	402.95
WBGene00047347	21ur-2246	IV	16115580	16115600	-1	1.36159e-07	1.48168	24.1318	30.9395	22.7589	91.9997	58.7377	67.2763
WBGene00047348	21ur-3320	IV	16375191	16375211	-1	0.291636	-0.435533	735.518	668.562	500.697	483.85	445.288	480.141
WBGene00047349	21ur-420	IV	15061274	15061294	1	0.205369	-0.79807	59.3241	62.3274	33.4272	20.8703	25.1733	44.6148
WBGene00047350	21ur-3962	IV	5603867	5603887	-1	0.666569	-1.39317	4.52472	4.48399	0.711217	0	0.559406	3.54086
WBGene00047351	21ur-2310	IV	15408444	15408464	-1	0.996795	-0.41961	1.00549	0.896797	0	0.851849	0.559406	0
WBGene00047352	21ur-3805	IV	17166436	17166456	-1	0.974453	-0.060939	172.442	162.769	200.563	184.425	161.109	166.42
WBGene00047353	21ur-1879	IV	14016931	14016951	-1	0.974453	-0.470731	1.50824	1.79359	1.42243	0.851849	0.559406	2.12452
WBGene00047354	21ur-478	IV	16273671	16273691	-1	0.825609	-1.00804	1.00549	3.13879	1.42243	0.851849	0	2.12452
WBGene00047355	21ur-886	IV	5518665	5518685	-1	0.943448	0.0987302	234.28	228.683	302.267	306.666	255.089	254.234
WBGene00047356	21ur-4472	IV	15608923	15608943	1	0.883845	-0.15648	600.279	648.833	969.389	741.109	676.322	570.079
WBGene00047357	21ur-665	IV	5422742	5422762	-1	0.450163	-0.848718	12.0659	10.7616	10.6683	3.4074	7.83169	7.78989
WBGene00047358	21ur-1739	IV	14853439	14853459	1	0.197663	0.924967	5.02747	9.86477	14.2243	23.8518	16.2228	13.4553
WBGene00047359	21ur-2635	IV	14869442	14869462	-1	0.974453	-0.0907216	28.1538	25.1103	24.1814	24.2777	25.1733	23.3697
WBGene00047360	21ur-2332	IV	16598681	16598701	1	0.0123755	0.652549	508.277	540.32	703.394	1040.53	953.788	755.62
WBGene00047361	21ur-4145	IV	15717048	15717068	1	0.119956	0.521009	195.568	180.256	247.504	282.388	373.683	235.821
WBGene00047362	21ur-124	IV	15097953	15097973	1	0.160003	-0.461855	182.497	158.285	138.687	106.907	106.287	136.677
WBGene00047363	21ur-1347	IV	5214660	5214680	1	0.974453	-0.28217	10.5577	13.9004	4.97852	4.68517	5.59406	14.8716
WBGene00047364	21ur-4975	IV	4985802	4985822	-1	0.984151	-0.1739	7.5412	8.51957	0	5.53702	3.35644	5.66538
WBGene00047365	21ur-3724	IV	16216656	16216676	1	0.103955	1.00443	7.03845	5.38078	7.11217	12.3518	11.1881	15.5798
WBGene00047366	21ur-3168	IV	16773735	16773755	1	0.978054	-0.0694662	37.2032	34.0783	49.7852	43.0184	28.5297	43.1985
WBGene00047367	21ur-928	IV	14649446	14649466	1	0.969474	-0.110688	570.617	545.253	778.071	731.738	572.273	446.857
WBGene00047368	21ur-4726	IV	16104755	16104775	-1	0.974453	-1.6973	0.502747	0.448399	0	0	0	0
WBGene00047369	21ur-4191	IV	14515432	14515452	-1	0.967827	1.30584	1.00549	0	0	0.851849	1.67822	0
WBGene00047370	21ur-3368	IV	6498286	6498306	1	1	-0.0061218	0.502747	0.448399	0.711217	0.425925	1.11881	0
WBGene00047371	21ur-1927	IV	15956448	15956468	-1	0.974453	0.459834	0.502747	0.448399	2.84487	1.7037	1.67822	1.41634
WBGene00047372	21ur-4650	IV	4969308	4969328	1	0.422631	0.594425	21.6181	23.7651	29.1599	48.9813	31.8862	30.4514
WBGene00047373	21ur-246	IV	15758556	15758576	1	0.000248393	1.20832	133.228	136.313	209.098	439.554	383.193	279.02
WBGene00047374	21ur-1223	IV	15247907	15247927	-1	1	-0.143144	1.00549	1.3452	0	0.425925	1.11881	0.708172
WBGene00047375	21ur-4202	IV	16606772	16606792	1	0.377305	-2.17861	3.01648	4.48399	2.13365	0.425925	1.67822	0
WBGene00047376	21ur-1065	IV	14972050	14972070	-1	0.544463	0.401598	48.7664	40.3559	59.031	71.9813	68.2476	53.8211
WBGene00047377	21ur-3405	IV	6021565	6021585	1	0.934585	0.134224	180.486	162.32	218.344	244.907	222.644	145.175
WBGene00047378	21ur-2481	IV	5079651	5079671	-1	0.52688	-0.433037	21.6181	25.1103	27.0262	20.4444	17.901	15.5798
WBGene00047379	21ur-465	IV	14011090	14011110	1	0.233947	0.781503	15.0824	13.452	16.358	34.4999	29.0891	12.0389
WBGene00047380	21ur-539	IV	14355456	14355476	1	#N/A	#N/A	0	0	0	0	0	0
WBGene00047381	21ur-2041	IV	15898597	15898617	-1	0.714376	-1.17747	2.51373	4.03559	2.13365	0.851849	1.67822	1.41634
WBGene00047382	21ur-254	IV	6131197	6131217	-1	0.0170451	-0.727733	87.9806	90.1281	77.5227	45.5739	52.5842	57.3619
WBGene00047383	21ur-4493	IV	16616602	16616622	1	0.510341	0.694138	5.53021	6.27758	4.97852	5.53702	11.7475	10.6226
WBGene00047384	21ur-2790	IV	15337843	15337863	-1	6.21362e-09	1.371	54.2966	51.1174	68.988	175.055	132.02	139.51
WBGene00047385	21ur-2111	IV	14680336	14680356	1	0.134175	0.974855	7.5412	5.82918	4.97852	14.9074	11.7475	9.20624
WBGene00047386	21ur-1855	IV	4843081	4843101	-1	0.974453	0.946579	0	0.448399	0	0.425925	0	0.708172
WBGene00047387	21ur-1943	IV	14572574	14572594	1	0.557843	0.232068	84.9642	83.4021	89.6133	109.037	102.931	89.2297
WBGene00047388	21ur-2404	IV	5714189	5714209	1	0.936093	-0.126089	78.9312	74.4342	99.5704	84.759	78.8763	65.86
WBGene00047389	21ur-4324	IV	15690402	15690422	1	0.0575483	0.54824	93.5109	110.754	141.532	189.536	172.857	139.51
WBGene00047390	21ur-2959	IV	16532473	16532493	-1	1	-0.0383503	11.5632	8.07118	3.55609	5.53702	7.83169	9.91441
WBGene00047391	21ur-1902	IV	14266262	14266282	1	0.887199	0.219576	41.2252	45.2883	68.988	81.7775	51.4654	45.323
WBGene00047392	21ur-5402	IV	5497739	5497759	1	0.0113708	1.07627	37.2032	52.911	61.1647	160.999	84.4704	70.8172
WBGene00047393	21ur-3318	IV	6496145	6496165	1	0.427113	1.11576	4.02197	0.896797	0.711217	3.83332	3.91584	4.9572
WBGene00047394	21ur-255	IV	6131753	6131773	1	1	0.0245637	0	0.448399	0	0.425925	0	0
WBGene00047395	21ur-3348	IV	16190285	16190305	1	0.00160285	2.08325	5.02747	3.13879	0.711217	11.074	13.4258	15.5798
WBGene00047396	21ur-525	IV	5514405	5514425	1	0.160452	0.646335	25.1373	26.0071	37.6945	47.2776	44.1931	46.0312
WBGene00047397	21ur-3733	IV	13629642	13629662	-1	0.882113	-0.13461	163.895	143.936	162.157	136.296	146.564	145.175
WBGene00047398	21ur-2766	IV	13995662	13995682	1	0.974453	0.428451	0.502747	0.896797	2.84487	1.27777	2.79703	1.41634
WBGene00047399	21ur-3672	IV	15272925	15272945	-1	0.838577	-0.61941	107.085	99.5445	145.799	81.3516	72.1634	75.7744
WBGene00047400	21ur-4952	IV	16246907	16246927	-1	0.974453	0.462426	2.01099	1.79359	2.84487	1.27777	5.03466	2.83269
WBGene00047401	21ur-1911	IV	16105130	16105150	-1	0.979648	0.0499625	52.7884	61.879	68.2768	76.6664	55.9406	55.2374
WBGene00047402	21ur-4242	IV	15064994	15065014	-1	0.34342	-0.399033	81.4449	80.7118	93.1694	66.8702	53.703	72.9417
WBGene00047403	21ur-4111	IV	16619747	16619767	-1	0.974453	-0.0913117	40.7225	39.4591	33.4272	27.2592	39.7179	41.074
WBGene00047404	21ur-3579	IV	16705054	16705074	1	0.785433	-1.12927	1.50824	1.79359	3.55609	0	0.559406	2.83269
WBGene00047405	21ur-639	IV	13959123	13959143	1	0.974453	-1.13012	1.50824	0.896797	0	0	1.11881	0
WBGene00047406	21ur-4593	IV	15093741	15093761	1	0.897425	1.00341	0.502747	1.79359	0.711217	2.55555	2.79703	0.708172
WBGene00047407	21ur-2830	IV	14355243	14355263	-1	0.664874	-0.425159	62.8433	35.4235	27.0262	23.4259	30.7674	40.3658
WBGene00047408	21ur-4016	IV	14539451	14539471	1	0.0147106	1.54535	4.02197	4.48399	2.13365	11.5	10.6287	9.91441
WBGene00047409	21ur-2451	IV	14757099	14757119	1	0.974453	0.986352	0	0	0	0	0.559406	0
WBGene00047410	21ur-3710	IV	16715797	16715817	1	0.974453	0.198987	12.5687	13.0036	12.8019	11.9259	12.8663	19.8288
WBGene00047411	21ur-1124	IV	15569423	15569443	-1	0.995897	-0.0311327	259.417	273.075	342.095	344.573	271.312	237.238
WBGene00047412	21ur-695	IV	16558238	16558258	1	0.974453	0.986358	0	0	0	0.425925	0	0
WBGene00047413	21ur-4267	IV	13632908	13632928	1	0.928179	-0.555678	2.01099	2.24199	2.13365	1.27777	1.67822	1.41634
WBGene00047414	21ur-4479	IV	14924883	14924903	1	0.953156	1.33675	0	0	0.711217	0.851849	0.559406	0
WBGene00047415	21ur-3204	IV	13639937	13639957	-1	1	-0.0177828	42.7335	40.3559	34.8496	29.3888	43.0743	45.323
WBGene00047416	21ur-2042	IV	14008217	14008237	1	0.897296	0.29572	10.5577	9.41637	11.3795	11.9259	7.83169	19.1206
WBGene00047417	21ur-3356	IV	14149060	14149080	-1	0.0060032	1.86647	5.02747	4.03559	2.13365	17.8888	15.6634	7.78989
WBGene00047418	21ur-160	IV	14692398	14692418	-1	0.896542	-0.141855	248.357	217.473	317.203	262.37	251.733	192.623
WBGene00047419	21ur-4390	IV	16149734	16149754	1	0.808604	-0.526513	18.0989	10.3132	7.82339	6.81479	6.15347	12.7471
WBGene00047420	21ur-3251	IV	17051947	17051967	1	0.78472	-0.409058	32.1758	27.8007	15.6468	17.4629	16.2228	24.0779
WBGene00047421	21ur-3248	IV	15117048	15117068	1	0.85402	-0.58591	11.0604	3.13879	7.11217	3.4074	3.91584	7.08172
WBGene00047422	21ur-5192	IV	14970752	14970772	1	0.74861	-0.76413	10.5577	11.21	8.5346	4.68517	5.59406	7.78989
WBGene00047423	21ur-3411	IV	5777190	5777210	-1	0.974453	-0.0860402	45.2472	38.5623	27.7375	24.2777	31.3268	50.9884
WBGene00047424	21ur-2208	IV	15575844	15575864	-1	0.798932	1.12084	1.00549	1.79359	0	2.12962	2.23763	2.12452
WBGene00047425	21ur-3034	IV	15239983	15240003	-1	0.86474	1.39888	0.502747	0.896797	0	0.851849	1.67822	1.41634
WBGene00047426	21ur-2328	IV	13899128	13899148	-1	0.897296	-2.38627	1.00549	0	2.13365	0	0	0.708172
WBGene00047427	21ur-3744	IV	14030822	14030842	-1	0.974453	-1.97252	0.502747	0	0.711217	0	0	0
WBGene00047428	21ur-5046	IV	15055571	15055591	-1	0.974453	0.986352	0	0	0	0.425925	0	0
WBGene00047429	21ur-1797	IV	14394498	14394518	-1	0.118893	0.696777	66.8653	104.028	83.9236	92.8516	179.01	142.343
WBGene00047430	21ur-181	IV	13983432	13983452	1	1	0	0	0	0	0	0	0
WBGene00047431	21ur-1170	IV	17019021	17019041	1	0.000253779	1.19394	35.1923	29.1459	42.673	108.611	65.4506	67.2763
WBGene00047432	21ur-2655	IV	14544895	14544915	-1	1	0.481168	0.502747	0.448399	0	0	0	1.41634
WBGene00047433	21ur-3567	IV	5876806	5876826	1	0.747154	-1.99466	3.01648	1.79359	0.711217	1.27777	0	0
WBGene00047434	21ur-2807	IV	15104858	15104878	-1	0.968966	2.05792	0	0	0	0	0.559406	0.708172
WBGene00047435	21ur-2976	IV	14239631	14239651	1	0.175592	-0.65987	48.7664	40.3559	61.1647	37.0554	27.9703	29.0351
WBGene00047436	21ur-936	IV	14220194	14220214	1	1	-0.107325	0	0.448399	0.711217	0.425925	0.559406	0
WBGene00047437	21ur-1299	IV	14702301	14702321	1	0.968966	0.29872	4.52472	6.72598	3.55609	5.96294	5.59406	7.08172
WBGene00047438	21ur-2589	IV	13704775	13704795	-1	0.690366	0.357288	15.5851	26.4555	31.2935	35.7777	28.5297	28.3269
WBGene00047439	21ur-387	IV	16802116	16802136	1	2.98183e-05	2.06798	5.53021	4.93238	5.68974	32.7962	15.104	18.4125
WBGene00047440	21ur-468	IV	14312259	14312279	-1	0.0400445	-0.685455	124.681	109.409	89.6133	53.2406	63.7723	86.397
WBGene00047441	21ur-2592	IV	16047459	16047479	1	9.44392e-11	1.67048	110.101	127.794	138.687	523.461	402.773	268.397
WBGene00047442	21ur-3244	IV	14940483	14940503	1	0.974453	0.0960951	333.824	357.822	352.052	286.647	438.575	391.619
WBGene00047443	21ur-3829	IV	15890587	15890607	1	0.974453	-0.168473	7.03845	10.3132	4.2673	5.1111	6.15347	8.49806
WBGene00047444	21ur-3953	IV	5105590	5105610	-1	0.974453	0.986352	0	0	0	0	0	0.708172
WBGene00047445	21ur-1336	IV	6390377	6390397	1	0.00650582	1.58552	4.02197	6.27758	4.97852	17.4629	16.2228	12.0389
WBGene00047446	21ur-2780	IV	16911760	16911780	1	0.236717	-0.342516	278.019	294.598	316.492	279.832	214.812	203.954
WBGene00047447	21ur-471	IV	15569637	15569657	-1	3.31446e-05	0.989163	52.2856	39.9075	38.4057	89.8701	87.8268	82.148
WBGene00047448	21ur-4646	IV	6164919	6164939	1	0.321196	1.11621	1.00549	4.48399	2.13365	6.81479	5.03466	4.9572
WBGene00047449	21ur-413	IV	15698781	15698801	1	0.54007	0.41778	26.6456	29.5943	23.4702	34.4999	42.5149	29.7432
WBGene00047450	21ur-3773	IV	15582979	15582999	1	0.391117	-0.94384	26.6456	26.4555	8.5346	8.94442	9.50991	14.1634
WBGene00047451	21ur-4108	IV	14179283	14179303	1	0.827619	-0.180923	374.043	374.413	524.878	428.906	346.273	345.588
WBGene00047452	21ur-3738	IV	14939384	14939404	1	1.02836e-05	1.32948	20.6126	17.4875	20.6253	58.3517	44.1931	43.1985
WBGene00047453	21ur-802	IV	14857042	14857062	1	0.116885	-0.492642	74.9092	71.2954	78.9451	52.8146	60.9753	45.323
WBGene00047454	21ur-4671	IV	14809271	14809291	1	0.931526	-0.130958	131.72	118.826	128.73	96.6849	119.713	131.012
WBGene00047455	21ur-3386	IV	6057117	6057137	-1	1	0.0075818	2.51373	1.79359	0	0.851849	1.67822	2.12452
WBGene00047456	21ur-1721	IV	15597170	15597190	1	0.651936	-1.49635	3.51923	0.448399	2.13365	0.851849	0.559406	0.708172
WBGene00047457	21ur-961	IV	14398613	14398633	-1	0.98946	0.119849	3.01648	1.3452	2.13365	2.12962	3.35644	1.41634
WBGene00047458	21ur-3026	IV	5795426	5795446	1	0.605974	0.270529	85.9697	96.8541	88.9021	95.4071	130.901	101.977
WBGene00047459	21ur-2465	IV	14582841	14582861	-1	0.89994	1.27409	0.502747	0.896797	0	1.7037	1.11881	0.708172
WBGene00047460	21ur-4467	IV	14338847	14338867	1	0.000152659	0.967374	210.148	201.779	301.556	520.48	487.802	381.705
WBGene00047461	21ur-1665	IV	15054811	15054831	-1	0.885651	-0.229612	31.1703	21.5231	36.2721	22.9999	26.8515	25.4942
WBGene00047462	21ur-2795	IV	17225880	17225900	1	0.712489	-0.817862	8.04395	5.82918	4.2673	3.83332	1.67822	4.9572
WBGene00047463	21ur-4614	IV	14931491	14931511	-1	1	0.02183	91.4999	104.477	122.329	100.092	101.812	121.097
WBGene00047464	21ur-4383	IV	16186121	16186141	1	0.988704	-0.22942	3.01648	0.448399	1.42243	2.12962	0.559406	1.41634
WBGene00047465	21ur-1956	IV	14749615	14749635	-1	0.0501931	-0.674416	68.3735	75.331	73.2554	41.7406	42.5149	52.4047
WBGene00047466	21ur-1676	IV	13750862	13750882	-1	0.962327	-0.10591	1164.86	1170.77	1574.63	1474.13	1005.25	1151.49
WBGene00047467	21ur-2426	IV	5528804	5528824	-1	0.130667	0.671601	19.6071	17.9359	16.358	34.9258	26.2921	24.0779
WBGene00047468	21ur-29	IV	13925921	13925941	1	0.974453	-0.937224	0.502747	0	0	0	0	0
WBGene00047469	21ur-5292	IV	14560449	14560469	1	0.653227	-1.92432	1.50824	4.93238	0	0.425925	0	1.41634
WBGene00047470	21ur-4435	IV	14363369	14363389	-1	0.537281	-0.226211	276.511	318.363	333.561	266.629	271.872	254.234
WBGene00047471	21ur-990	IV	14743675	14743695	1	0.934429	-0.490065	8.54669	3.13879	3.55609	1.27777	1.67822	8.49806
WBGene00047472	21ur-3129	IV	13946211	13946231	1	0.138902	-0.45762	283.549	246.171	218.344	186.129	163.347	196.164
WBGene00047473	21ur-135	IV	15777129	15777149	1	0.974453	0.450411	1.00549	2.69039	0	0.425925	2.79703	2.12452
WBGene00047474	21ur-4101	IV	13692200	13692220	1	0.762207	0.515738	4.02197	5.38078	10.6683	10.2222	8.9505	8.49806
WBGene00047475	21ur-4440	IV	16178838	16178858	1	0.686184	-0.915251	9.04944	8.07118	3.55609	2.12962	2.23763	7.08172
WBGene00047476	21ur-1644	IV	14378439	14378459	-1	0.0321919	1.16551	10.0549	12.1068	12.8019	28.111	22.3763	27.6187
WBGene00047477	21ur-4314	IV	14124072	14124092	-1	2.44269e-07	1.35875	294.609	328.228	495.007	1219.85	875.471	764.826
WBGene00047478	21ur-69	IV	15902148	15902168	-1	0.974453	-0.937224	0	0.448399	0	0	0	0
WBGene00047479	21ur-4123	IV	16993915	16993935	-1	#N/A	#N/A	0	0	0	0	0	0
WBGene00047480	21ur-2514	IV	16698976	16698996	-1	6.90599e-07	1.64726	12.5687	13.9004	16.358	53.6665	41.9555	36.1168
WBGene00047481	21ur-1924	IV	15602022	15602042	-1	0.237877	-0.504961	105.074	90.1281	84.6348	51.5369	63.7723	83.5643
WBGene00047482	21ur-4152	IV	4886776	4886796	1	0.0103354	0.783619	27.6511	23.3167	28.4487	49.8332	44.1931	41.074
WBGene00047483	21ur-1370	IV	16986835	16986855	1	0.437764	1.7762	1.00549	0.448399	0	1.7037	2.23763	1.41634
WBGene00047484	21ur-3711	IV	16187999	16188019	-1	0.251709	1.01593	2.51373	6.27758	2.84487	10.2222	7.27228	6.37355
WBGene00047485	21ur-3445	IV	16716455	16716475	1	0.91297	-1.79855	0	1.3452	0.711217	0	0.559406	0
WBGene00047486	21ur-4802	IV	14401748	14401768	1	0.912206	-0.454338	11.0604	7.62278	4.2673	4.25925	4.47525	8.49806
WBGene00047487	21ur-913	IV	15387749	15387769	-1	0.941184	-0.101928	694.293	606.683	793.718	649.535	608.634	692.592
WBGene00047488	21ur-5449	IV	15858875	15858895	-1	0.974453	-0.509327	2.51373	4.03559	1.42243	0	1.67822	4.24903
WBGene00047489	21ur-2493	IV	14730357	14730377	-1	0.974453	-0.937224	0	0.448399	0	0	0	0
WBGene00047490	21ur-3688	IV	14457400	14457420	-1	0.0310837	1.00952	10.5577	13.9004	14.2243	27.6851	26.8515	22.6615
WBGene00047491	21ur-5396	IV	16148140	16148160	-1	0.617043	0.464968	21.1154	14.7972	8.5346	15.7592	21.8169	25.4942
WBGene00047492	21ur-772	IV	16112080	16112100	-1	0.696432	-0.518176	18.6016	26.9039	10.6683	8.94442	12.3069	19.1206
WBGene00047493	21ur-2146	IV	14565446	14565466	-1	0.720684	0.536294	8.04395	6.27758	5.68974	11.5	8.9505	8.49806
WBGene00047494	21ur-433	IV	16590138	16590158	-1	0.974453	-0.501649	1.50824	0.896797	2.84487	0	1.67822	2.12452
WBGene00047495	21ur-78	IV	16614150	16614170	1	0.031752	1.49766	3.51923	3.13879	3.55609	14.9074	8.3911	4.24903
WBGene00047496	21ur-3664	IV	15817624	15817644	-1	0.974453	-0.456542	4.52472	1.79359	3.55609	0.851849	1.67822	4.9572
WBGene00047497	21ur-4053	IV	16089311	16089331	-1	0.981968	-0.500028	0.502747	0.896797	0	0.425925	0.559406	0
WBGene00047498	21ur-1090	IV	15346784	15346804	1	0.974453	-0.0967215	191.546	205.815	286.62	243.629	177.332	217.409
WBGene00047499	21ur-3762	IV	14913878	14913898	-1	0.974453	0.599228	0	1.3452	0.711217	0.851849	2.23763	0
WBGene00047500	21ur-4510	IV	15701663	15701683	1	0.974453	0.10527	444.428	418.356	624.449	781.572	479.971	334.965
WBGene00047501	21ur-751	IV	6023954	6023974	1	0.159085	0.82386	35.695	43.9431	58.3198	80.0738	113	49.572
WBGene00047502	21ur-2650	IV	5495645	5495665	1	0.772198	-0.320019	30.6675	32.7331	36.9833	25.9814	31.3268	22.6615
WBGene00047503	21ur-3906	IV	16725283	16725303	1	0.0809905	-1.00765	58.3186	40.8043	33.4272	18.3148	20.698	27.6187
WBGene00047504	21ur-1824	IV	4960014	4960034	-1	0.01014	4.14795	0.502747	0.448399	0	9.37034	6.71288	2.12452
WBGene00047505	21ur-4000	IV	16475766	16475786	-1	0.000854229	1.03547	19.1044	22.4199	19.2029	40.8888	42.5149	41.7822
WBGene00047506	21ur-850	IV	15412161	15412181	1	0.881267	0.167577	1118.61	1273.9	1554.01	1602.75	1726.89	1100.5
WBGene00047507	21ur-125	IV	17158376	17158396	1	0.57141	1.39808	1.00549	1.3452	0.711217	1.7037	4.47525	2.12452
WBGene00047508	21ur-1253	IV	14662131	14662151	-1	1	-0.0245774	3.51923	2.24199	3.55609	2.12962	2.23763	4.9572
WBGene00047509	21ur-542	IV	6044470	6044490	1	0.808809	0.704968	1.50824	7.17438	2.84487	4.68517	6.15347	8.49806
WBGene00047510	21ur-2800	IV	17235436	17235456	-1	0.419553	1.44719	2.01099	1.3452	0.711217	3.4074	4.47525	3.54086
WBGene00047511	21ur-518	IV	14265312	14265332	1	0.182267	-0.358301	686.752	602.199	585.332	430.184	441.931	592.74
WBGene00047512	21ur-2253	IV	14039457	14039477	1	0.974453	-0.359574	2.01099	3.58719	0.711217	1.27777	1.67822	2.12452
WBGene00047513	21ur-1884	IV	15758263	15758283	1	0.646615	-0.242381	258.914	226.441	261.017	185.703	214.253	231.572
WBGene00047514	21ur-1589	IV	16166988	16167008	-1	0.972662	0.100299	112.615	109.409	123.041	143.111	121.391	103.393
WBGene00047515	21ur-1786	IV	13711413	13711433	1	1.46346e-05	2.39799	4.02197	3.13879	2.84487	15.3333	18.4604	19.8288
WBGene00047516	21ur-4743	IV	15135100	15135120	1	0.0232059	1.2173	17.5961	10.7616	6.40095	20.4444	25.1733	37.5331
WBGene00047517	21ur-575	IV	15225453	15225473	1	0.513104	-0.232973	175.459	179.359	214.788	171.222	164.465	146.592
[truncated: 12,715 more rows]
