# Supplementary material for: SNPC-1.3 is a sex-specific transcription factor that drives male piRNA expression in C. elegans
Source: eLife. 2021 Feb 15;10:e60681. doi: 10.7554/eLife.60681 (PMC7884074; doi:10.7554/eLife.60681)
Supplement: Supplementary file 4. [file elife-60681-supp4.xlsx]

## Sheet: Sheet1
Table S4. List of guides, repair templates, and oligos used in this study
Guides and repair templates used for CRISPR
Strain	Genotype	Description	Source:	Method:	Guide RNA sequence	Repair Template
QK162	snpc-4(xk23) I [snpc-4::aid::ollas]	Inserted AID into QK188 with sgRNA targeting Ollas	this study	CRISPR insertion (Paix et al., 2017)	TCCGAGCTCGTTGGCGAATC	GGAGGCTCAGGACCTAAAGATCCAGCCAAACCTCCGGCCAAGGCACAAGTTGTGGGATGGCCACCGGTGAGATCATACCGGAAGAACGTGATGGTTTCCTGCCAAAAATCAAGCGGTGGCCCGGAGGCGGCGGCGTTCGTGAAGGGATCGGACTACAAAGATCATGACGGTGATTATAAAGATCATGATATCGATTACAAGGATGACGATGACAAG
QK171	snpc-1.3(xk27)[snpc-1.3(lof)] V	introduction of stop codon into snpc-1.3 coding region	this study	CRISPR insertion (Paix et al., 2017)	AGAGTGACTGCTGGACTTCGAGG	TTGATAAGAGTGACTGCCGGACTCCGAGGATAACTCGACGAATTTCTCAAAGCGTTTCTG
QK172	snpc-1.3(xk28)[snpc-1.3(1xtbs)] V	Site-specific mutations in the snpc-1.3 promoter	this study	CRISPR insertion (Paix et al., 2017)	TGGCAGAAGACCACCCAGTGCGG	GGTCTCGCCGCGCACTCTGCTACAGTAACCGACCCATGAGTGTGGCAGAAGACCACCCAGTGCGGAAAAGACCA
QK173	snpc-1.3(xk29)[snpc-1.3(2xtbs)] V	Site-specific mutations in the snpc-1.3 promoter	this study	CRISPR insertion (Paix et al., 2017)	TGGCAGAAGACCACCCAGTGCGG	GGTCTCGCCGCGCACTCTGCTACAGTAACCGACCCATGAGTGTGGCAGAAGACCAATGAGTGCGGAAAAGACCAATGAGGGAGCACATAGCTTTTAGGCCTTTCTTTCATTTTC
QK174	snpc-1.3(xk30)[snpc-1.3(3xtbs)] V	Site-specific mutations in the snpc-1.3 promoter	this study	CRISPR insertion (Paix et al., 2017)	TGGCAGAAGACCACCCAGTGCGG	GGTCTCGCCGCGCACTCTGCTACAGTAACCGACCCATGAGTGTGGCAGAAGACCAATGAGTGCGGAAAAGACCAATGAGGGAGCACATAGCTTTTAGGCCTTTCTTTCATTTTC
QK175	snpc-4(xk31)[snpc-4::3xflag] I	Inserted 3xFlag at C-terminus	this study	CRISPR insertion (Paix et al., 2017)	AAACCACGGTATGTCGGATT	CGATACGGAGAGTAATATTTCGCTCAAAGTTGAGTTAGATGACTACAAAGACCATGACGGTGATTATAAAGATCATGATATCGATTACAAGGATGACGATGACAAGATATTCTATTATTGAACAATATAACTATTTTACCCAATC
QK182	snpc-1.3(xk32)[snpc-1.3a::3xflag] V	Inserted 3xFlag at C-terminus of a isoform, deletion and PTC introduced into b isoform	this study	CRISPR insertion (Paix et al., 2017)	TGGAACAGATTGATCAAAGA	GATGGAAATTCGAATCACTCTACGATGCATAGCTAATCATCACTTCAGTCTAATTTAAGGTTACTTGTCATCGTCATCCTTGTAATCGATATCATGATCTTTATAATCACCGTCATGGTCTTTGTAGTCTGCTGCCGATCCTGAGGCTCCTGCCGATCCCGATGCTCCCTTACAAGGCTCTGAACATGACCTTCCGTTGC
QK184	snpc-1.3(xk33)[snpc-1.3a::ollas] V	Inserted Ollas at C-terminus of a isoform, deletion and PTC introduced into b isoform	this study	CRISPR insertion (Paix et al., 2017)	TGGAACAGATTGATCAAAGA	TGGAACAGATTGATCAAAGATGGAAATTCGAATCACTCTACGATGCATAGCTAATCATCACTtcaGTCTAATTTAAGGTTACTTTCCCATGAGACGTGGTCCGAGCTCGTTGGCGAATCCGGATGCTGCCGATCCTGAGGCTCCTGCCGATCCCGATGCTCCCTTACAAGGCTCTGAACATGACCTTCCGTTGCTCA
QK186	prde-1(xk34)[prde-1::ollas] V	Inserted Ollas at C-terminus	this study	CRISPR insertion (Paix et al., 2017)	AAAATGAACAGAAATCGCAA	TCTTGTGAGTTTATCAACTTTTCAGGTAAAAAATGTCCGGATTCGCCAACGAGCTCGGACCACGTCTCATGGGAAAGAACAGAAATCGCAAAGGACACGATTTAGAAAACAT
QK188	snpc-4(xk35)[snpc-4::ollas] I	Inserted Ollas at C-terminus	this study	CRISPR insertion (Paix et al., 2017)	AAACCACGGTATGTCGGATT	TGACATAGAGTTGGGTAAAATAGTTATATTGTTCAATAATAGAATATTCACTTTCCCATGAGACGTGGTCCGAGCTCGTTGGCGAATCCGGAATCTAACTCGACTTTGAGCGAAATATTACTCTCCGTATCGATCGAGACGT
QK192	snpc-1.3(xk36)[snpc-1.3a::3xflag(2xtbs)] V	3xFlag injected into the C-terminus of QK173	this study	CRISPR insertion (Paix et al., 2017)	TGGAACAGATTGATCAAAGA	GATGGAAATTCGAATCACTCTACGATGCATAGCTAATCATCACTTCAGTCTAATTTAAGGTTACTTGTCATCGTCATCCTTGTAATCGATATCATGATCTTTATAATCACCGTCATGGTCTTTGTAGTCTGCTGCCGATCCTGAGGCTCCTGCCGATCCCGATGCTCCCTTACAAGGCTCTGAACATGACCTTCCGTTGC
QK193	tra-1(xk37)[3xflag::tra-1] III	Inserted 3xFlag at N-terminus	this study	CRISPR insertion (Paix et al., 2017)	CTCGAATTAACCTCAGTACT	CTCTCCAAATTCAACAGGAAATCAAAAACAACGAAAACGGCGGCATGATGGACTACAAAGACCATGACGGTGATTATAAAGATCATGATATCGATTACAAGGATGACGATGACAAGGCCCCCAGCACCGAGGTTAATTCGAGGAATTTTGAATTAAAAAACTAATT
Oligos used for Quantitative RT-PCR and Quantitative PCR of ChIP samples
Sequence	Description
GGCGGGATTGTAGTGGAG	3.7 Mb (big) cluster F ChIP-qPCR primers
GAATCTTTTGGCAGCAGTCTACTAC	3.7 Mb (big) cluster R ChIP-qPCR primers
CCGGTTGTACAGCCCTAATC	2.5 Mb (small) cluster F ChIP-qPCR primers, from Kasper et al., 2014
CGCCTACCCACGTGTCTACT	2.5 Mb (small) cluster R ChIP-qPCR primers, from Kasper et al., 2014
AGCTTTCCTTTGCCCACTTT	intergenic F ChIP-qPCR primers, from Kasper et al., 2014
TAGCCAAACACAATCGACCA	intergenic RChIP-qPCR primers, from Kasper et al., 2014
ACGCTCGTGATGAGTTCAAG	eft-2 F qRT-PCR primers
ATTTGGTCCAGTTCCGTCTG	eft-2 R qRT-PCR primers
ACAAATGCGAGTTTGCCGAC	tra-1 F qRT-PCR primers
ACTCGAGTGAGCCACAACAG	tra-1 R qRT-PCR primers
AAATGCAGCCGAAATCGAC	snpc-4 F qRT-PCR primers (Figure 5)
TAACGAACATCAACTTCCGTG	snpc-4 R qRT-PCR primers (Figure 5)
TGAGCCAGGAGCAAGTACGA	snpc-4 F qRT-PCR primers (Figure 2)
TTGACATTCATGAGCCCTTCG	snpc-4 F qRT-PCR primers (Figure 2)
GCTGAAGTGTTGAGCAACGG	F snpc-1.3b specific qPCR (Figure 2, 5)
AGCAATTCGGCTAGTATCGGG	R snpc-1.3b specific qPCR (Figure 2, 5)
TCCTTCATGCGAATGACCCG	F snpc-1.3a specific qPCR detect both a and b (Figure 2)
GCGCTTTGAATCTACCCAGC	R snpc-1.3a specific qPCR detect both a and b (Figure 2)
ATCTCAACTCGAGACTGCC	U1 F qRT-PCR primers
TTAGGCCTACCCATTGCAC	U1 R qRT-PCR primers
21UR-1258 TaqMan probe: UAGACUUGAGUUAGAACGGUU	ThermoFisher
21UR-3142 TaqMan probe: GUAGGGUCGUCUCUUGAGAGC	ThermoFisher
21UR-3766 TaqMan probe: UGGAAGCUUGAUGGAAAAUGC	ThermoFisher
Bacterial and Virus Strains
E. coli OP50	Shared Fermentation Facility, The Pennsylvania State University
E. coli HB101	Shared Fermentation Facility, The Pennsylvania State University
E. coli HT115 RNAi clones	Kamath and Ahringer, 2003
